# Supplementary material for: Evolutionary and Functional Characterization of Cytochrome P450 in Cotton Reveal the Role of Subgenome Expression of GhCYP78A for Cotton Fiber Initiation
Source: Preprints.org preprint supplement (doi:10.20944/preprints202203.0049.v1), 2022-03-02
Supplement: Supplementary file 1 [file supplementary]

| <b>Cotton</b>               | <b>SRA</b>  | <b>Developmental stages</b> |
|-----------------------------|-------------|-----------------------------|
| <i>Gossypium raimondii</i>  | SRR203240   | 10 DPA                      |
|                             | SRR203250   | 20 DPA                      |
|                             |             |                             |
| <i>Gossypium herbaceum</i>  | SRR10609501 | 20 DPA                      |
|                             | SRR10609503 | 10 DPA                      |
|                             | SRR10609504 | 0 DPA                       |
|                             |             |                             |
| <i>Gossypium arboreum</i>   | SRR10609488 | 0 DPA                       |
|                             | SRR10609487 | 10 DPA                      |
|                             | SRR10609485 | 20 DPA                      |
|                             |             |                             |
| <i>Gossypium barbadense</i> | SRR3098092  | 0 DPA                       |
|                             | SRR3098093  | 10 DPA                      |
|                             | SRR3098094  | 20 DPA                      |

**Table S1** SRA accession numbers that were accessed for the different fiber developmental stages of different cotton species

| Gene ID                 | Forward Sequence                 | Reverse Sequence               |
|-------------------------|----------------------------------|--------------------------------|
| Gh_A03G020500.1         | GAATCAAGTAAAGGGCCTTCTCATG        | GATGAATCTGTAAGGAGGTCCTTTGAT    |
| Gh_A04G170100.1         | CCTCAACTATGGGGAGACGATGTA         | GAGAGCAACCTTTGCTTCTGTGGT       |
| Gh_A05G402400.1         | AATTATACATGGACAAGGTCAAGGGTATG    | GCTCCGCCATGGCTATCTATTTT        |
| Gh_A09G019200.1         | CAACCATCTGTAATTCATTCTTGACTCTT    | CAATATGGCATGTAATCAAATTTAACAGAA |
| Gh_A10G197500.1         | CATTAGGAAAAGATAGAAAGGGAGGG       | TGGCGTGCAGCACATAGATTAG         |
| Gh_A11G107100.1         | CTCAAAATCGAAAACCCATCTGG          | TGGATGCAAGGGCGAAGA             |
| Gh_A11G142900.1         | TAAGGTCATTCAAGCAAGTTTGGC         | AAGATCTCCTCCATATCGAGATCATCT    |
| Gh_A12G060900.1         | CAAGGGGTTTCATAATGGTGATCCTAT      | TCTTCAGCACTTGCGGGTG            |
| Gh_A13G019100.1         | AGAAAGCAAACAAAATCACATCCC         | GTCAACAACGAAGCTGTTTGTGTC       |
| Gh_D02G034000.1         | GCTTCTAATTCTTGCTCCATGTTGT        | GATGAATCTGTAAGGAGGTCCTTTGAT    |
| Gh_D04G019000.1         | CTTGGAATTTATGGTTTTTGGGAATAATTGT  | CGATGGATGTTGAGAAGTAACGTG       |
| Gh_D05G378900.1         | ATGGGGAGGGTGTTGGCG               | AAATGTGCCGACCACAGAGGATA        |
| Gh_D11G165300.1         | AGTCAATGTCAACACCATCATCACC        | CAAAGGCCACCCGTAGGATC           |
| Gh_D13G091900.1         | AATGGGTTTGGCCACCGTT              | GAGTTTCAAATGTTCAAGCAGGTCC      |
|                         |                                  |                                |
| <b>Internal Control</b> |                                  |                                |
| Gh_D10G015900.1         | TTCTTGAGTTGCTTACTGTACTTTGTTTTCTA | CTTGTGGGTTCTTCCCAGTTTC         |

**Table S2** Primer used for this study along with the internal control primer sequence of the UBQ14.
