# Supplementary material for: Evolutionary and Functional Characterization of Cytochrome P450 in Cotton Reveal the Role of Subgenome Expression of GhCYP78A for Cotton Fiber Initiation
Source: Preprints.org preprint supplement (doi:10.20944/preprints202203.0049.v1), 2022-03-02
Supplement: Supplementary file 1 [file Supplementary File.xlsx]

## Sheet: Dataset S1
Supplementary Dataset 1 – Identification and characterization of CYP450 in Gossypium raimondii genome with haeme binding and ERR triad motif position.
GeneID	Chr	Start	End	Strand	CYP name	rename_for_variants	Protein length	Haeme Binding Motif	Motif Pos	ERR Triad Motif	ERR Triad Pos	TM helices	Topology
Gorai.001G002600.1	Chr01	47621790	47623540	-	CYP736A195	GrCYP736A195.1	353	FGAGRRGC	432	KESFRLHP	356	0	o
Gorai.001G047200.1	Chr01	33592287	33593647	-	CYP82C138P	GrCYP82C138P	362	FGAGRRIC	322	KETMRLYP	244	0	o
Gorai.001G047200.2	Chr01	58282436	58286121	-	CYP727B4	GrCYP727B4.4	559	FGSGARAC	352	YESARVMP	245	1	i31-53o
Gorai.001G047200.3	Chr01	1886645	1890813	-	CYP736A355P	GrCYP736A355P	272	VGSGRRAD	31	NETMLLAG	250	1	i47-69o
Gorai.001G047200.4	Chr01	35941693	35943503	-	CYP716E46	GrCYP716E46	391	FGGGPRMC	331	CEVMRLAP	260	0	o
Gorai.001G047200.5	Chr01	1145423	1154806	-	CYP82D334P	GrCYP82D334P	428	VILGKRIS	120	KETLCLYP	263	0	o
Gorai.001G047200.6	Chr01	1436888	1439175	+	CYP714A30	GrCYP714A30.6	522	FGVGSRLC	342	QEALRLYP	266	1	i7-29o
Gorai.001G058600.1	Chr01	60556538	60559538	-	CYP72A506	GrCYP72A506	521	FGGGPRIC	462	NEVLRLYP	385	1	i12-34o
Gorai.001G063600.1	Chr01	16794235	16802585	+	CYP749A77	GrCYP749A77	543	FGLGPRSC	463	NETLRLYP	386	1	i7-24o
Gorai.001G063900.1	Chr01	1435826	1439175	+	CYP714A30	GrCYP714A30.1	402	FGVGSRLC	463	QEALRLYP	387	0	o
Gorai.001G088900.1	Chr01	21934039	21936661	-	CYP82C96a	GrCYP82C96a	525	FGSGRRSC	456	KETLRLYP	377	2	o4-26,i227-246o
Gorai.001G089000.1	Chr01	31044712	31046253	-	CYP736A354	GrCYP736A354	493	FGSGCRVC	373	KETLRLYL	311	1	i7-24o
Gorai.001G089100.1	Chr01	21964254	21966642	-	CYP82C96b	GrCYP82C96b	524	FGSGRRSC	515	KETLRLYP	436	3	i12-29,o62-84,i286-305o
Gorai.001G090300.1	Chr01	17126977	17130347	+	CYP735A40	GrCYP735A40	522	FAAGPRNC	458	NESLRLYP	385	1	i5-27o
Gorai.001G090300.2	Chr01	8512938	8515231	-	CYP735A41	GrCYP735A41	519	FAAGPRNC	458	NESLRLYP	385	1	i5-27o
Gorai.001G090300.3	Chr01	23231439	23233564	-	CYP81B89	GrCYP81B89	501	FGNGRRRC	430	NETFRMKP	356	0	o
Gorai.001G090300.5	Chr01	55666084	55668049	-	CYP87A96	GrCYP87A96	418	FGSGVRLR	392	NETIRLGN	319	1	i5-22o
Gorai.001G104400.1	Chr01	10049524	10051506	+	CYP89A152	GrCYP89A152	512	FGVGRRIC	446	LEGLRRHP	367	1	i5-27o
Gorai.001G104500.1	Chr01	57779914	57781455	+	CYP89A154	GrCYP89A154	513	FGVGRRIC	450	LEGLRRHP	368	0	o
Gorai.001G104600.1	Chr01	59205590	59207149	+	CYP89A153	GrCYP89A153	514	FGVGRRIC	450	LEGLRRHP	367	0	o
Gorai.001G111700.1	Chr01	55016568	55018380	+	CYP71AN51	GrCYP71AN51	507	FGFGRRRC	440	KETLRLHP	364	1	i9-28o
Gorai.001G111700.2	Chr01	1120589	1122109	-	CYP77B25	GrCYP77B25	506	FGAGRRIC	444	KETFRRHP	364	0	o
Gorai.001G115100.1	Chr01	3117325	3120107	+	CYP749A228	GrCYP749A228	512	FGLGPRSC	449	NETLRLYG	372	1	i3-25o
Gorai.001G134900.1	Chr01	32923842	32926063	-	CYP71AN78	GrCYP71AN78.1	516	FGAGRRVC	449	KETLRLHA	375	0	o
Gorai.001G188600.1	Chr01	3822546	3826823	-	CYP707A268	GrCYP707A268.2	409	FGNGVHAC	357	LEGLRMAS	287	0	o
Gorai.001G208200.1	Chr01	7370084	7374301	-	CYP87B29	GrCYP87B29.1	480	FGGGNRPC	421	NETLRLEN	348	2	o4-23,i276-298o
Gorai.001G208200.2	Chr01	7370087	7374205	-	CYP87B29	GrCYP87B29.2	480	FGGGNRPC	420	NETLRLEN	347	2	o4-23,i277-299o
Gorai.001G208200.4	Chr01	7341980	7344955	-	CYP87B30	GrCYP87B30	482	FGGGDRPC	423	NETLRLEN	350	1	i5-27o
Gorai.001G208200.5	Chr01	20904021	20907664	-	CYP90B35	GrCYP90B35.1	485	FGGGPRLC	459	NETLRLGN	376	1	i7-24o
Gorai.001G208200.6	Chr01	20904018	20908011	-	CYP90B35	GrCYP90B35.2	516	FGGGPRLC	428	NETLRLGN	345	1	i7-24o
Gorai.001G208700.1	Chr01	18697172	18699706	+	CYP749A75	GrCYP749A75	519	FGFGPRTC	453	NEALRLYP	376	1	i7-29o
Gorai.001G213800.1	Chr01	15666530	15675740	+	CYP74B25	GrCYP74B25.2	496	YTGNTRVC	149	YETLRMNP	383	0	o
Gorai.001G213800.2	Chr01	3562847	3565300	+	CYP72A502a	GrCYP72A502a.1	470	FGWGPRIC	456	YEVLRLYP	380	0	o
Gorai.001G213800.3	Chr01	3559636	3576081	+	CYP72A502a	GrCYP72A502a.2	518	FGWGPRIC	450	YEVLRLYP	374	1	i5-24o
Gorai.001G217300.1	Chr01	46571139	46573307	-	CYP76F93	GrCYP76F93	482	FGAGRRIC	439	KETFRMHP	363	1	i7-26o
Gorai.001G222700.1	Chr01	58751253	58753135	-	CYP93A88	GrCYP93A88	515	FGSGRRSC	446	KETLRLHP	362	1	i7-26o
Gorai.001G222800.1	Chr01	39734329	39736758	+	CYP93A89	GrCYP93A89.1	454	FGSGRRSC	447	KETLRLHP	364	1	i7-26o
Gorai.001G239400.1	Chr01	37470471	37475676	+	CYP87B31	GrCYP87B31.2	483	FGGGNRAC	402	EERMNLYP	227	3	o5-24,i271-293,o303-325i
Gorai.001G239600.1	Chr01	37470370	37475826	+	CYP87B31	GrCYP87B31.1	401	FGGGNRAC	415	EERMNLYP	240	2	o5-24,i271-293o
Gorai.002G043200.1	Chr02	41655053	41658679	+	CYP51G1	GrCYP51G1.1	486	FGGGRHGC	422	KEALRLHP	341	1	i7-29o
Gorai.002G043200.2	Chr02	41655269	41658423	+	CYP51G1	GrCYP51G1.2	486	FGGGRHGC	422	KEALRLHP	341	1	i7-29o
Gorai.002G043300.1	Chr02	41655737	41658423	+	CYP51G1	GrCYP51G1.3	486	FGGGRHGC	422	KEALRLHP	341	1	i7-29o
Gorai.002G043400.1	Chr02	12424016	12424834	+	CYP71BE175P	GrCYP71BE175P	191	INLGEMLC	170	KEAPKNLP	28	1	o4-23i
Gorai.002G043400.2	Chr02	57162298	57165260	+	CYP51G32	GrCYP51G32	486	FGGGRHGC	422	KEALRLHP	341	1	i7-29o
Gorai.002G043600.1	Chr02	59022733	59024713	+	CYP98A94	GrCYP98A94	508	FGAGRRVC	431	KEALRLHP	355	0	o
Gorai.002G043600.2	Chr02	3185743	3188379	-	CYP711A55	GrCYP711A55.1	430	FGIGPRAC	477	KEAMRFYI	401	1	i20-42o
Gorai.002G043600.3	Chr02	3185743	3188338	-	CYP711A55	GrCYP711A55.2	539	FHMGRQPL	87	KEAMRFYI	401	1	i20-42o
Gorai.002G062200.1	Chr02	4752137	4755592	+	CYP714A29	GrCYP714A29.2	523	FGLGTRLC	341	QEAMRLYP	265	1	i7-29o
Gorai.002G062400.1	Chr02	31981735	31983257	+	CYP71BC9P	GrCYP71BC9P	475	FGAGHRIC	308	NNTFRLHP	253	0	o
Gorai.002G062400.2	Chr02	4751502	4755592	+	CYP714A29	GrCYP714A29.1	400	FGLGTRLC	464	QEAMRLYP	388	0	o
Gorai.002G071900.1	Chr02	375647	377672	+	CYP71BE69	GrCYP71BE69	498	FGAGRRIC	429	KESIRLHP	354	1	i2-21o
Gorai.002G072000.1	Chr02	48277406	48281826	+	CYP75B105	GrCYP75B105.1	393	FGAGRRIC	440	KETFRIHP	360	1	i2-21o
Gorai.002G087900.1	Chr02	16099310	16100968	+	CYP701A52	GrCYP701A52	394	FGAGKRAC	322	HETLRKHS	247	0	o
Gorai.002G097100.1	Chr02	1558275	1563340	+	CYP716A119	GrCYP716A119	480	FGGGPRMC	420	CEVLRLAP	349	1	i5-24o
Gorai.002G097300.1	Chr02	8891627	8894187	-	CYP716A120	GrCYP716A120	476	FGGGPRMC	418	CEVMRLAP	347	1	o4-23i
Gorai.002G097400.1	Chr02	25116564	25118088	-	CYP81AT10P	GrCYP81AT10P	480	FGMGRRAS	365	DEMRRLLL	152	1	i7-24o
Gorai.002G097500.1	Chr02	36484986	36486590	-	CYP96A130	GrCYP96A130	499	FNAGPRTC	438	CEALRLYP	360	0	o
Gorai.002G097700.1	Chr02	8421127	8422639	-	CYP96A235	GrCYP96A235	291	FGAGPRIC	412	CEALRLYP	334	1	i5-24o
Gorai.002G097800.1	Chr02	3057272	3058804	-	CYP96K6a	GrCYP96K6a	510	FLAGPRIC	449	CETLRLHP	371	1	i3-25o
Gorai.002G097900.1	Chr02	6316774	6318560	-	CYP94C84	GrCYP94C84	500	FQAGQRVC	421	CESLRLFP	344	0	o
Gorai.002G097900.2	Chr02	638075	639784	+	CYP94C85	GrCYP94C85	517	FQAGLRVC	450	CESLRLFP	373	1	i21-43o
Gorai.002G098000.1	Chr02	55354940	55356811	+	CYP94A74	GrCYP94A74	506	FQAGPRIC	441	CESMRLYP	359	1	i2-24o
Gorai.002G098100.1	Chr02	36197433	36198965	-	CYP94B68	GrCYP94B68	510	FQAGPRVC	448	CESMRLYP	366	1	i2-24o
Gorai.002G098100.2	Chr02	2953515	2955309	-	CYP94B70	GrCYP94B70	515	FQAGPRVC	453	CESMRLYP	371	1	i5-27o
Gorai.002G098100.3	Chr02	11585311	11586843	-	CYP94B71	GrCYP94B71	510	FQAGPRVC	447	CESMRLYP	364	1	i7-29o
Gorai.002G098300.1	Chr02	3014817	3016356	-	CYP96K6b	GrCYP96K6b	511	FLAGPRIC	434	CETLRLHP	356	1	i5-27o
Gorai.002G129200.1	Chr02	41014387	41017220	-	CYP85A41	GrCYP85A41.4	412	FGGGTRQC	355	FETSRLAT	283	0	o
Gorai.002G130200.1	Chr02	15976553	15978241	-	CYP82D218	GrCYP82D218	412	FSSGRRMC	319	KETMRLYP	241	0	o
Gorai.002G184000.1	Chr02	12456157	12458595	-	CYP71BE176P	GrCYP71BE176P.3	372	FGAGRRIC	279	KETLRLHP	203	0	o
Gorai.002G228600.1	Chr02	773796	781025	-	CYP90C25	GrCYP90C25.5	516	FGGGQRLC	303	SETLRMAN	230	1	i17-34o
Gorai.002G228700.1	Chr02	9208496	9211406	-	CYP733A1a	GrCYP733A1a	446	FGSGPRMC	388	SETLRRAT	318	0	o
Gorai.002G228800.1	Chr02	55195098	55197010	+	CYP71AN72a	GrCYP71AN72a.1	447	FGFGRRAC	445	KETLRLHP	368	2	o6-28,i187-206o
Gorai.002G230900.1	Chr02	3586026	3588231	+	CYP72A505	GrCYP72A505	376	FGWGPRIC	456	YEVLRLYP	380	1	o10-32i
Gorai.002G241100.1	Chr02	44013112	44015265	+	CYP704A128	GrCYP704A128.2	512	YCKGKRNQ	101	TETLRLYP	372	1	i5-27o
Gorai.003G012100.1	Chr03	12300680	12302857	-	CYP71BE66	GrCYP71BE66	502	FGAGRRMC	433	SETLRLHP	357	1	i5-22o
Gorai.003G012100.2	Chr03	14893403	14895098	+	CYP736A338a	GrCYP736A338a	490	FGSGRRVC	428	SETLRLYP	351	1	i7-24o
Gorai.003G012100.3	Chr03	25069900	25071662	-	CYP81AT2	GrCYP81AT2	500	FGMGRRAC	428	SETLRLYP	355	1	i7-24o
Gorai.003G012100.4	Chr03	2488478	2491972	-	CYP81BA1	GrCYP81BA1	507	FGMGRRAC	439	SETLRLYP	364	0	o
Gorai.003G012100.5	Chr03	15247029	15249651	-	CYP81BA2	GrCYP81BA2	504	FGLGRRAC	434	SETLRLYP	359	0	o
Gorai.003G023600.1	Chr03	11099296	11101879	-	CYP728B43	GrCYP728B43	474	FGGGPRIC	413	METLRMFP	341	0	o
Gorai.003G023900.1	Chr03	43503379	43505836	-	CYP749A74	GrCYP749A74	519	FGIGPRTC	453	NEALRLYP	376	1	i7-29o
Gorai.003G024400.1	Chr03	41386569	41389059	+	CYP72A507	GrCYP72A507.2	514	FGWGPRIC	348	LEVMRLYP	273	1	i7-25o
Gorai.003G024500.1	Chr03	14393275	14396844	+	CYP724B28	GrCYP724B28	493	FGGGSRCC	431	NEALRYGN	360	1	i7-29o
Gorai.003G027500.1	Chr03	1133766	1140314	-	CYP82D335	GrCYP82D335	503	FGSGRRMC	907	KETLRLYP	829	1	i5-27o
Gorai.003G047300.1	Chr03	12265286	12267258	-	CYP71BE65	GrCYP71BE65	508	FGAGRRMC	438	KETLRLHP	362	1	i7-26o
Gorai.003G051700.1	Chr03	11954938	11966232	+	CYP710A140	GrCYP710A140	502	FGAGPHQC	432	REVIRYRP	358	2	o5-25,i67-86o
Gorai.003G058600.1	Chr03	53434845	53435684	+	CYP76F168P	GrCYP76F168P	239	FTAGTDTT	182	RENLQVIK	87	0	o
Gorai.003G077000.1	Chr03	47235935	47237846	+	CYP71BE70a	GrCYP71BE70a	507	FGAGRRIC	436	KETLRLHP	360	1	i7-25o
Gorai.003G107200.1	Chr03	47440823	47446631	-	CYP97A50	GrCYP97A50.1	469	FGGGPRKC	516	NESLRLYP	439	0	o
Gorai.003G107200.2	Chr03	47440822	47446505	-	CYP97A50	GrCYP97A50.2	587	FGGGPRKC	516	NESLRLYP	439	0	o
Gorai.003G107400.1	Chr03	47440844	47446505	-	CYP97A50	GrCYP97A50.3	511	FGGGPRKC	516	NESLRLYP	439	0	o
Gorai.003G120800.1	Chr03	6756063	6758568	+	CYP704A264	GrCYP704A264	506	FQAGPRVC	443	TETIRLYP	365	1	i7-26o
Gorai.003G123900.1	Chr03	3134743	3136989	+	CYP749A198	GrCYP749A198	516	FGIGPRSC	453	NETLRLYG	376	1	i7-29o
Gorai.003G125500.1	Chr03	41251056	41253600	+	CYP714E36	GrCYP714E36	516	FGVGPRVC	457	QESLRLYP	381	1	i7-29o
Gorai.003G125500.2	Chr03	12997815	13002224	-	CYP707A143	GrCYP707A143.1	399	FGNGVHSC	431	QETLRRSS	361	1	o22-44i
Gorai.003G125500.3	Chr03	12999713	13002224	-	CYP707A143	GrCYP707A143.2	430	FGNGVHSC	431	QETLRRSS	361	1	o22-44i
Gorai.003G125500.6	Chr03	48354337	48356948	-	CYP707A141	GrCYP707A141.1	384	FGNGTHSC	436	QETLRVAS	366	0	o
Gorai.003G129900.1	Chr03	52503432	52505210	+	CYP77B26	GrCYP77B26	505	FGAGRRIC	444	KETLRRHP	364	0	o
Gorai.003G162200.1	Chr03	52937507	52939995	+	CYP87A55	GrCYP87A55	470	FGGGMRFC	409	NETVRLAN	336	0	o
Gorai.003G162300.1	Chr03	3012026	3015149	+	CYP749A227	GrCYP749A227	516	FGLGPRSC	453	NETLRMYG	376	1	i7-29o
Gorai.003G162300.2	Chr03	43101605	43104220	-	CYP87A54	GrCYP87A54.1	474	FGGGLRFC	413	NETVRLAN	340	1	i2-21o
Gorai.003G165000.1	Chr03	20048914	20050417	+	CYP89A295	GrCYP89A295	492	FGARRRIC	423	LEGLRRHP	341	0	o
Gorai.003G165100.1	Chr03	36716216	36717842	+	CYP716E39	GrCYP716E39	482	FGGGPRMC	422	CEVMRLAP	351	1	i7-28o
Gorai.003G165300.1	Chr03	497239	500430	+	CYP716C26	GrCYP716C26	486	FGGGPRMC	427	YEVMRLTP	355	1	i7-29o
Gorai.003G165400.1	Chr03	1221801	1224847	+	CYP701A18	GrCYP701A18.2	504	FGAGKRAC	427	HETLRKHS	352	1	i5-22o
Gorai.003G165500.1	Chr03	60534096	60536482	+	CYP81AZ2	GrCYP81AZ2	457	FGLGRRAC	425	SETLRLNP	353	1	o4-23i
Gorai.003G165500.2	Chr03	60525101	60527733	+	CYP81AZ3	GrCYP81AZ3	428	FGLGRRGC	425	SETLRLNP	353	0	o
Gorai.003G165600.1	Chr03	1948277	1950146	-	CYP81B177	GrCYP81B177	500	FGAGRRGC	429	YETLRMYP	355	0	o
Gorai.003G165700.1	Chr03	59337596	59339339	+	CYP83F50	GrCYP83F50	492	FGAGRRVC	431	KETFRLQP	355	1	i2-21o
Gorai.003G165800.1	Chr03	1090932	1094092	-	CYP728D32	GrCYP728D32.1	312	FGGGARIC	414	METLRMNP	342	0	o
Gorai.003G166100.1	Chr03	5231302	5232913	-	CYP718A21	GrCYP718A21	484	FGGGPRTC	420	RECMRLFP	350	1	i7-25o
Gorai.004G009100.1	Chr04	4469778	4472273	+	CYP704A127	GrCYP704A127.5	559	YGRGAHIE	151	TETLRLYP	420	2	o32-54,i59-81o
Gorai.004G014400.1	Chr04	6750245	6752367	+	CYP704A129	GrCYP704A129.2	353	FHAGPRIC	288	TETLRLYP	211	0	o
Gorai.004G020800.1	Chr04	15648480	15650443	+	CYP78A202	GrCYP78A202	518	FGSGRRVC	455	KETLRVHP	378	2	o20-42,i49-71o
Gorai.004G095700.1	Chr04	17605306	17607373	+	CYP75A20	GrCYP75A20	510	FGAGRRIC	440	KETFRKHP	361	1	i7-26o
Gorai.004G129700.1	Chr04	47217593	47219555	+	CYP71BE72	GrCYP71BE72.2	508	FGAGRRVC	411	KETLRLHP	335	1	i7-26o
Gorai.004G149900.1	Chr04	47056331	47058667	+	CYP71BE74a	GrCYP71BE74a	508	FGAGRRVC	437	KETLRLHP	361	1	i7-26o
Gorai.004G149900.2	Chr04	47074404	47075995	+	CYP71BE74bP	GrCYP71BE74bP.1	213	FGAGRRVC	416	KETLRLHP	345	1	i7-26o
Gorai.004G149900.3	Chr04	47074337	47076314	+	CYP71BE74bP	GrCYP71BE74bP.2	506	FGAGRRVC	345	KETLRLHP	274	1	i5-24o
Gorai.004G155400.1	Chr04	61845984	61850808	+	CYP90A47	GrCYP90A47.2	473	FGGGPRLC	361	NETLRVAN	287	1	o4-21i
Gorai.004G155400.2	Chr04	55051480	55052885	-	CYP71AN52	GrCYP71AN52	436	FGFGRKGC	369	KETLRLHP	293	0	o
Gorai.004G159000.1	Chr04	2967500	2970000	+	CYP749A72a	GrCYP749A72a	525	FGLGPRSC	462	NETLRLYG	385	1	i16-38o
Gorai.004G177200.1	Chr04	53680653	53682552	+	CYP83F63	GrCYP83F63	485	FGAGRRVC	439	KETFRLQP	363	1	i2-21o
Gorai.004G177200.2	Chr04	4866114	4874265	-	CYP92A131	GrCYP92A131	510	FGAGRRMC	439	KETMRLHP	363	1	i5-24o
Gorai.004G177200.3	Chr04	4865995	4868398	-	CYP92A132_A131-fusion	GrCYP92A132_A131-fusion	510	FGAGRRMC	439	KETMRLHP	363	1	i7-26o
Gorai.004G187200.1	Chr04	45431226	45432987	+	CYP79D66	GrCYP79D66	533	FGRGRRGC	435	REAFRLHP	354	0	o
Gorai.004G187300.1	Chr04	50527220	50529590	-	CYP707A142	GrCYP707A142.1	409	FGSGTHSC	405	QETLRVAS	335	1	i5-27o
Gorai.004G187300.2	Chr04	50527228	50529586	-	CYP707A142	GrCYP707A142.2	463	FGSGSKLA	397	QETLRVAS	335	1	i5-27o
Gorai.004G187300.3	Chr04	11940658	11942166	+	CYP710A142	GrCYP710A142	502	LGAGPHQC	396	QETVREIA	248	1	i7-29o
Gorai.004G187300.4	Chr04	8333019	8335732	+	CYP79D64	GrCYP79D64	550	FSTGMRGC	476	REAFRLHP	397	1	i21-43o
Gorai.004G198400.1	Chr04	1066723	1068155	-	CYP82D148	GrCYP82D148.4	428	IIVGKRIS	208	KECLTIND	101	2	o10-32,i117-139o
Gorai.004G202000.1	Chr04	60498648	60501058	+	CYP81AZ1	GrCYP81AZ1	460	FGLRRRAC	428	SETLRLNP	356	1	i7-25o
Gorai.004G204700.1	Chr04	68366672	68368084	-	CYP706Q16P	GrCYP706Q16P	329	FGSGRRIC	261	KETLRLHP	185	0	o
Gorai.004G204800.1	Chr04	682277	683968	-	CYP706Q6	GrCYP706Q6	533	FGSGRRIC	464	KETLRLHP	388	1	i23-45o
Gorai.004G204900.1	Chr04	663866	665459	-	CYP706Q8	GrCYP706Q8	478	FGSGRRMC	409	KETLRLHP	333	0	o
Gorai.004G205000.1	Chr04	6336791	6340120	-	CYP71AH6	GrCYP71AH6	500	FGVGRRGC	462	KETLRLHP	386	2	o27-46,i90-112o
Gorai.004G205400.1	Chr04	66554159	66555103	+	CYP706Q10bP	GrCYP706Q10bP	258	SATALRVM	39	KETLRLHP	220	0	o
Gorai.004G213300.1	Chr04	3182311	3185657	+	CYP749A68	GrCYP749A68	511	FGLGPRSC	449	NETLRLYG	372	1	i3-25o
Gorai.004G219500.1	Chr04	60476101	60480905	-	CYP97C38	GrCYP97C38.2	548	FGSGFAIA	152	TESLRLYP	401	0	o
Gorai.004G255300.1	Chr04	36600306	36602428	-	CYP703A26	GrCYP703A26	524	FSAGKRKC	466	RETFRMHP	386	2	o15-34,i230-249o
Gorai.004G270700.1	Chr04	12356800	12359960	-	CYP71BE173P	GrCYP71BE173P	250	INLGEMLC	159	KEAPKTLP	28	1	o4-23i
Gorai.004G278200.1	Chr04	47621606	47623612	-	CYP736A195	GrCYP736A195.2	499	FGAGRRGC	286	KESFRLHP	210	1	i7-24o
Gorai.005G005900.1	Chr05	50193280	50196713	-	CYP88A81_scaf	GrCYP88A81_scaf	486	FGGGSRIC	427	DESMRRAN	356	1	i5-24o
Gorai.005G032600.1	Chr05	13543613	13545482	-	CYP82J11	GrCYP82J11	528	FGSGRRSC	457	KETFRLYP	379	2	o4-26,i315-337o
Gorai.005G032800.1	Chr05	32013822	32015265	+	CYP71BC8P	GrCYP71BC8P	430	FMGGIVTT	272	KETFRLYP	330	0	o
Gorai.005G032900.1	Chr05	16884554	16886457	+	CYP81B90	GrCYP81B90	542	FGTGRRRC	471	KETFRMCP	397	1	i35-54o
Gorai.005G033100.1	Chr05	46575262	46577298	-	CYP76F166	GrCYP76F166	500	FGAGRRIC	436	KETFRMHP	360	0	o
Gorai.005G033200.1	Chr05	2121401	2122991	-	CYP83F73	GrCYP83F73	497	FGAGRRVC	415	KETFRLQP	339	2	o4-23,i276-298o
Gorai.005G033300.1	Chr05	1986746	1987794	-	CYP83F71P	GrCYP83F71P	308	IAFGKRYD	58	KETFRLQS	229	0	o
Gorai.005G033400.1	Chr05	61390989	61392886	-	CYP76A49	GrCYP76A49	512	FGAGRRMC	443	KETFRLHP	367	2	o4-23,i69-91o
Gorai.005G033500.1	Chr05	43574411	43575787	-	CYP706B2bP	GrCYP706B2bP	450	FGSNDIAF	131	KETFRLHP	326	1	i21-43o
Gorai.005G033600.1	Chr05	43561922	43564436	-	CYP706B2a	GrCYP706B2a	527	FGSGRRKC	455	KETFRLHP	377	1	i21-43o
Gorai.005G033700.1	Chr05	49253280	49255134	-	CYP71BF18P	GrCYP71BF18P	527	FSSRRRIC	369	KETFRLYP	293	1	i17-39o
Gorai.005G079500.1	Chr05	22968861	22970716	-	CYP736A193	GrCYP736A193	513	FGSGRRGC	443	KEGLRLHP	366	2	o5-22,i302-324o
Gorai.005G079800.1	Chr05	22596254	22598138	-	CYP736A196	GrCYP736A196	499	FGAGRRLC	434	KEIFRLHP	357	1	i5-27o
Gorai.005G100400.1	Chr05	1098515	1100287	-	CYP82D151	GrCYP82D151	524	FSSGRRMC	447	KETLRLYP	369	2	o5-22,i105-127o
Gorai.005G100700.1	Chr05	11633700	11636650	+	CYP82L15	GrCYP82L15	515	FSSGRRSC	445	KETLRLYP	367	2	o4-21,i217-236o
Gorai.005G100700.2	Chr05	11712694	11715660	+	CYP82L17	GrCYP82L17	515	FSSGRRSC	445	KETLRLYP	367	2	o4-21,i216-233o
Gorai.005G105800.2	Chr05	56010660	56013359	+	CYP706P7	GrCYP706P7	533	FGSGRRIC	464	KETLRIHP	386	1	i20-42o
Gorai.005G146000.1	Chr05	12520605	12521302	-	CYP71BE180P	GrCYP71BE180P	159	FGAGRRMC	133	KETLRLHP	41	0	o
Gorai.005G175500.1	Chr05	15798169	15800022	+	CYP721A96	GrCYP721A96	434	FEEGKRIF	201	NETLRLYS	358	1	i7-26o
Gorai.005G176000.1	Chr05	37010794	37012329	-	CYP86A128	GrCYP86A128	511	FNAGPRTC	449	AETLRLYP	369	1	i7-24o
Gorai.005G176100.1	Chr05	47442388	47446505	-	CYP97A50	GrCYP97A50.6	616	GLATDRLC	228	NESLRLYP	439	0	o
Gorai.005G197400.1	Chr05	51052623	51054647	+	CYP92A220P	GrCYP92A220P	239	MLVPHQTC	87	KETMRLHL	76	0	o
Gorai.005G237800.1	Chr05	49856270	49859016	+	CYP73A26	GrCYP73A26	505	FGVGRRSC	440	KETLRLRM	362	1	i5-24o
Gorai.005G237800.2	Chr05	11107198	11108724	-	CYP84A77	GrCYP84A77	508	FGSGRRSC	438	KETLRLHP	362	0	o
Gorai.005G237800.3	Chr05	1897879	1902498	-	CYP736A197	GrCYP736A197	507	FGSGRRGC	440	KESLRLHP	363	1	i2-24o
Gorai.006G032500.1	Chr06	45729002	45731923	+	CYP704B42	GrCYP704B42	534	FQAGPRIC	473	TETLRLYP	396	1	i7-29o
Gorai.006G032600.1	Chr06	6772864	6775150	+	CYP704A263	GrCYP704A263.3	506	FAAGLSEE	345	TETLRLYP	365	2	o47-66,i333-355o
Gorai.006G041600.1	Chr06	4469772	4472279	+	CYP704A127	GrCYP704A127.2	508	FQAGPRIC	498	TETLRLYP	420	2	o32-54,i59-81o
Gorai.006G061800.1	Chr06	15117631	15118176	+	CYP83F68P	GrCYP83F68P	154	FGAGRRIC	120	KETFKLQP	44	0	o
Gorai.006G062000.1	Chr06	43474296	43477274	+	CYP706B19	GrCYP706B19	532	FGSGRRKC	463	KETFRLHP	385	1	i21-43o
Gorai.006G062100.1	Chr06	48277461	48281820	+	CYP75B105	GrCYP75B105.2	510	FGDGSGGS	188	KETFRIHP	360	1	i2-21o
Gorai.006G062200.1	Chr06	3599274	3601544	+	CYP72A504	GrCYP72A504.3	557	FEEGRRIF	219	KESLREMI	267	1	i13-32o
Gorai.006G081800.1	Chr06	43581094	43583162	+	CYP706B1a	GrCYP706B1a	536	FGSGRRMC	466	KETFRLHP	388	1	i21-43o
Gorai.006G111000.1	Chr06	4469778	4472273	+	CYP704A127	GrCYP704A127.6	588	FQAGPRIC	415	TETLRLYP	337	2	o32-54,i59-81o
Gorai.006G140400.1	Chr06	13565665	13568062	-	CYP92A133	GrCYP92A133	515	FGSGRRMC	445	KETMRKHP	369	1	i5-27o
Gorai.006G140500.1	Chr06	53698289	53700195	+	CYP83F48	GrCYP83F48	510	FGAGRRVC	444	KETFRLQP	368	1	i7-29o
Gorai.006G140600.1	Chr06	33554421	33557891	-	CYP82C52	GrCYP82C52	513	FGAGRRIC	446	KETLRLYP	368	2	o4-26,i218-240o
Gorai.006G140700.1	Chr06	9224167	9226910	+	CYP733A1b	GrCYP733A1b	477	FGSGPRMC	419	SETLRRAT	349	1	i5-27o
Gorai.006G140700.2	Chr06	16843393	16845959	-	CYP81T4	GrCYP81T4	518	FGVGRRAC	447	SETMRLFP	374	1	i7-26o
Gorai.006G156400.1	Chr06	44013053	44016335	+	CYP704A128	GrCYP704A128.1	383	FHAGPRIC	449	TETLRLYP	372	1	i5-27o
Gorai.006G198200.1	Chr06	35237473	35241784	-	CYP749A73	GrCYP749A73	513	FSMGPRSC	454	NETLRLYS	377	1	i7-29o
Gorai.006G211000.1	Chr06	6366067	6368997	+	CYP71AN47	GrCYP71AN47	525	FGCGRRDC	457	KETLRLHP	381	1	i32-51o
Gorai.006G211100.1	Chr06	66531967	66532858	+	CYP706Q15P	GrCYP706Q15P	150	FGSWRRMC	105	KETLRLHP	29	0	o
Gorai.006G211200.1	Chr06	89497	91210	-	CYP706Q3	GrCYP706Q3	522	FGSGRRIC	439	KETLRLHP	363	1	i25-44o
Gorai.006G216200.1	Chr06	3586026	3588231	+	CYP72A503	GrCYP72A503	518	FEEGKRIF	219	REILNKFN	117	1	i13-32o
Gorai.006G217000.1	Chr06	10622116	10626271	-	CYP90D39	GrCYP90D39.2	487	FGGGQRLC	425	TEALRMGN	353	1	i7-26o
Gorai.006G224300.1	Chr06	52595427	52597939	+	CYP706C46	GrCYP706C46	502	FGSGRRIC	432	KESLRLHP	356	1	i2-21o
Gorai.006G224400.1	Chr06	16043634	16045885	-	CYP82D146	GrCYP82D146	526	FGAGRRLC	459	KESLRLYP	381	1	i7-29o
Gorai.006G224400.2	Chr06	611711	617850	+	CYP722A1	GrCYP722A1	498	FGMGARTC	435	KESLRMAS	363	1	i5-27o
Gorai.007G008500.1	Chr07	58235813	58238243	+	CYP73A25	GrCYP73A25	505	FGVGRRSC	440	KETLRLRM	362	0	o
Gorai.007G008700.1	Chr07	58724700	58728603	-	CYP728G3	GrCYP728G3	494	FGAGPRVC	435	QELMRVNP	362	1	i20-42o
Gorai.007G041400.1	Chr07	48046347	48047858	-	CYP710A70a	GrCYP710A70a	503	LGAGPHQC	433	READRFEP	406	1	i7-29o
Gorai.007G042500.1	Chr07	4469778	4472273	+	CYP704A127	GrCYP704A127.1	441	FQAGPRIC	527	TETLRLYP	420	1	i39-61o
Gorai.007G049600.1	Chr07	221412	224591	-	CYP734A58	GrCYP734A58	518	FGLGVRTC	452	NESLRLYP	376	1	i7-29o
Gorai.007G092500.1	Chr07	8441124	8444246	-	CYP734A57	GrCYP734A57.2	515	FGLGVRTC	392	NESLRLYP	316	1	i7-29o
Gorai.007G092500.2	Chr07	1169661	1171434	-	CYP82D324P	GrCYP82D324P	374	FNLQKIHC	352	KETLHLYP	316	1	o10-32i
Gorai.007G092500.3	Chr07	15734904	15737518	+	CYP85A42	GrCYP85A42	466	FGGGSRHC	407	FETSRLAT	335	1	i2-24o
Gorai.007G092600.1	Chr07	9305651	9308523	-	CYP724A1	GrCYP724A1	438	FGGGPRLC	409	YESLRCGN	339	2	o4-26,i278-300o
Gorai.007G092700.1	Chr07	8085846	8088501	+	CYP86B33P	GrCYP86B33P	539	FNSGPRLC	412	SEALRLYP	335	2	o27-49,i61-78o
Gorai.007G092700.2	Chr07	55195168	55205127	+	CYP71AN72a	GrCYP71AN72a.2	513	FVAGSYTT	279	KETLRLHP	337	2	o6-28,i214-233o
Gorai.007G092700.3	Chr07	61845824	61850882	+	CYP90A47	GrCYP90A47.1	294	FGGGPRLC	411	NETLRVAN	337	0	o
Gorai.007G100300.1	Chr07	2997892	3000538	+	CYP749A72b	GrCYP749A72b	525	FGLGPRSC	438	NETLRLYG	361	1	i16-38o
Gorai.007G111300.1	Chr07	48832925	48835032	+	CYP71BF13	GrCYP71BF13	542	FGSGRRIC	476	KETLRLHP	400	1	i37-59o
Gorai.007G151200.1	Chr07	773760	781028	-	CYP90C25	GrCYP90C25.4	485	FGGGQRLC	264	SETLRMAN	191	1	i17-34o
Gorai.007G156800.1	Chr07	3822546	3826326	-	CYP707A268	GrCYP707A268.3	408	FGNGVHAC	358	LEGLRMAS	287	0	o
Gorai.007G163900.1	Chr07	61952174	61955434	+	CYP707A138	GrCYP707A138.3	473	FGNGVHAC	410	GETLQLYS	46	1	i3-21o
Gorai.007G171600.1	Chr07	5946873	5948857	-	CYP82C59	GrCYP82C59	520	FGSGRRIC	452	KETLRIKP	374	2	o10-29,i223-245o
Gorai.007G171600.2	Chr07	1108091	1111717	-	CYP82D152	GrCYP82D152	551	FSSGRRMC	454	KETLRIYP	376	1	i7-29o
Gorai.007G181100.1	Chr07	8405998	8408149	-	CYP736A331	GrCYP736A331	519	FGTGRRGC	452	KESFRLHP	375	1	i13-35o
Gorai.007G197700.1	Chr07	1562161	1565532	-	CYP734A56	GrCYP734A56.1	373	FGLGVRTC	454	NESLRLYP	378	1	i7-29o
Gorai.007G199100.1	Chr07	54612149	54613753	-	CYP86A131	GrCYP86A131	534	FNAGPRIC	450	SETLRLYP	371	0	o
Gorai.007G203700.1	Chr07	15829335	15831534	-	CYP81B88	GrCYP81B88	508	FGTGRRGC	437	SETFRMCP	363	1	i3-20o
Gorai.007G203700.2	Chr07	20230350	20234818	-	CYP90C26	GrCYP90C26	491	FGGGQRLC	434	SETLRLAN	361	1	i2-23o
Gorai.007G208700.1	Chr07	1119799	1121721	-	CYP82D222	GrCYP82D222	408	MIVGKRIP	203	KETLSLYP	376	1	i7-29o
Gorai.007G208800.1	Chr07	47912580	47914397	+	CYP71BE75a	GrCYP71BE75a	487	FGAGRRMC	436	KETMRLHP	360	1	o4-26i
Gorai.007G219100.1	Chr07	16045967	16048061	-	CYP82C54	GrCYP82C54	525	FGSGRRSC	456	KETLRLYP	378	2	o4-23,i225-244o
Gorai.007G219200.1	Chr07	39707706	39709386	+	CYP712J4	GrCYP712J4	508	FGSGRRVC	441	KETLRLHS	366	1	i7-28o
Gorai.007G236600.1	Chr07	8378955	8380464	-	CYP96A238	GrCYP96A238	193	FGAGPRIC	424	CEALRLNP	346	1	i5-24o
Gorai.007G236700.1	Chr07	13512518	13514281	+	CYP86A130	GrCYP86A130	514	FNAGPRTC	452	AETLRLYP	372	1	i7-26o
Gorai.007G244800.1	Chr07	6750274	6752367	+	CYP704A129	GrCYP704A129.3	518	YGKGKYTH	100	TETLRLYP	376	1	i5-27o
Gorai.007G246400.1	Chr07	6772864	6775150	+	CYP704A263	GrCYP704A263.2	506	FQAGPRIC	442	TETLRLYP	365	1	i7-26o
Gorai.007G347700.1	Chr07	58787871	58790217	+	CYP712A11	GrCYP712A11	514	FGSGRRGC	449	RETLRLHP	366	0	o
Gorai.007G347800.1	Chr07	28747174	28749002	-	CYP736A191	GrCYP736A191	502	FGAGRRLC	432	RETLRLHP	355	1	i2-24o
Gorai.007G347900.1	Chr07	22823572	22825321	-	CYP736A333	GrCYP736A333	493	FGSGRRVC	428	RETLRLHP	351	1	i7-24o
Gorai.007G371400.1	Chr07	48810293	48812362	-	CYP71AN55	GrCYP71AN55	539	FGFGRRGC	466	KETLRLHP	390	2	o36-58,i244-266o
Gorai.007G372200.1	Chr07	3599274	3602753	+	CYP72A504	GrCYP72A504.1	378	FGWGPRIC	456	YEVLRLYP	380	1	o10-32i
Gorai.007G372200.2	Chr07	3599274	3601544	+	CYP72A504	GrCYP72A504.2	518	FGWGPRIC	456	YEVLRLYP	380	1	i13-32o
Gorai.008G025900.1	Chr08	18813774	18815885	-	CYP74A59	GrCYP74A59	418	LTGGYRIL	47	YEGLRIEP	279	0	o
Gorai.008G026000.1	Chr08	35743110	35744916	+	CYP94C86	GrCYP94C86	499	FQAGKRVC	437	YESLRLFP	360	1	i7-29o
Gorai.008G026100.1	Chr08	23018514	23020894	+	CYP74A1	GrCYP74A1	523	PTLGNKQC	469	YEALRIEP	384	0	o
Gorai.008G044400.1	Chr08	45278097	45280162	-	CYP78A200	GrCYP78A200	518	FGSGRRVC	455	KETLRVHP	379	2	o20-42,i49-71o
Gorai.008G056100.1	Chr08	46985837	46987505	-	CYP93B85P	GrCYP93B85P	253	FGTGRRGC	347	KESFRLHP	327	0	o
Gorai.008G059000.1	Chr08	39734329	39739921	+	CYP93A89	GrCYP93A89.2	517	FGSGRRTA	447	KETLRLHP	364	1	i7-26o
Gorai.008G065700.1	Chr08	38368620	38372038	+	CYP707A144	GrCYP707A144	500	FGNGVHSC	439	GETLKLYK	76	1	o30-52i
Gorai.008G065700.2	Chr08	61952148	61956240	+	CYP707A138	GrCYP707A138.1	440	FGNGVHAC	410	GETLQLYS	46	1	i3-21o
Gorai.008G079200.1	Chr08	30397054	30400049	-	CYP82J10	GrCYP82J10	530	FGSGRRSC	459	KETLRLYP	381	0	o
Gorai.008G098700.1	Chr08	12324694	12326803	-	CYP71BE154	GrCYP71BE154	509	FGAGRRIC	434	KETLRLHP	358	1	i5-22o
Gorai.008G110600.1	Chr08	8363972	8366242	+	CYP749A76	GrCYP749A76	513	FGLGPRTC	453	NETLRLYP	376	1	i7-29o
Gorai.008G110600.2	Chr08	1157678	1159586	-	CYP82D322	GrCYP82D322	532	FGSGRRMC	454	KETLRLYP	376	1	i7-29o
Gorai.008G125800.1	Chr08	921295	924312	-	CYP88A80	GrCYP88A80	368	FGAGSRLC	302	DETLRLVT	231	0	o
Gorai.008G127600.1	Chr08	53569690	53571257	+	CYP76F159	GrCYP76F159	454	FGGGRRIC	390	KETLRLHP	314	0	o
Gorai.008G154900.1	Chr08	1066092	1068194	-	CYP82D148	GrCYP82D148.2	319	IIVGKRIS	208	KECLTIND	101	1	o10-32i
Gorai.008G154900.2	Chr08	1066092	1068194	-	CYP82D148	GrCYP82D148.3	319	IIVGKRIS	208	KECLTIND	101	1	o10-32i
Gorai.008G155900.1	Chr08	55062555	55064765	+	CYP71AN77P	GrCYP71AN77P	480	FGFGRRRC	348	RKTLNLPP	6	0	o
Gorai.008G155900.2	Chr08	55203483	55204306	+	CYP71AN72bP	GrCYP71AN72bP	228	FSNRPRTT	102	KKNLNLPP	33	1	o6-28i
Gorai.008G155900.3	Chr08	53607407	53608724	-	CYP83F70P	GrCYP83F70P	367	FGAGRRVC	298	RDAMRLSY	61	0	o
Gorai.008G161500.1	Chr08	47440844	47446505	-	CYP97A50	GrCYP97A50.4	616	GLATDRLC	228	NESLRLYP	439	0	o
Gorai.008G176400.1	Chr08	53483314	53485325	+	CYP76F89	GrCYP76F89	497	FGAGRRTC	433	KETLRLHP	357	1	i2-21o
Gorai.008G180000.1	Chr08	55940897	55945621	-	CYP90A46	GrCYP90A46	472	FGGGPRLC	414	NETLRVAN	339	1	i2-24o
Gorai.008G198200.1	Chr08	32923807	32926080	-	CYP71AN78	GrCYP71AN78.2	516	FGAGRRVC	449	KETLRLHA	375	0	o
Gorai.008G198200.2	Chr08	12243374	12245335	-	CYP71BE64	GrCYP71BE64	511	FGAGRRIC	441	KETLRLHN	366	1	i7-29o
Gorai.008G202400.1	Chr08	33551916	33553764	-	CYP82C51	GrCYP82C51	549	FGAGRRIC	481	KETLRLYP	403	2	o38-57,i254-276o
Gorai.008G202500.1	Chr08	9854839	9858384	-	CYP85A1	GrCYP85A1.3	437	FGGGTRQC	409	FETSRLAT	337	1	i3-25o
Gorai.008G207500.1	Chr08	9854839	9857665	-	CYP85A1	GrCYP85A1.4	464	FGGGTRQC	237	FETSRLAT	165	1	i3-25o
Gorai.008G218900.1	Chr08	14893901	14895427	+	CYP94B69	GrCYP94B69	508	FQAGPRIC	445	CESMRLYP	363	1	i7-29o
Gorai.008G218900.2	Chr08	55006160	55007943	+	CYP71AN50	GrCYP71AN50	507	FGFGRRRC	440	KETLRLHP	364	1	i9-28o
Gorai.008G222500.1	Chr08	51656217	51657464	-	CYP71AS20	GrCYP71AS20	383	FGGGRRIC	321	KETLRLHP	245	0	o
Gorai.008G222600.1	Chr08	42859268	42864298	+	CYP71AS19	GrCYP71AS19	518	FGGGRRGC	445	KETLRLHP	369	2	o5-27,i305-327o
Gorai.008G239200.1	Chr08	47754038	47755995	-	CYP71BE78	GrCYP71BE78	500	FGAGRRIC	432	KETLRLHP	356	1	i5-23o
Gorai.008G244100.1	Chr08	43101891	43104220	-	CYP87A54	GrCYP87A54.2	474	FGGGLRFC	413	NETVRLAN	340	1	i2-21o
Gorai.008G247600.1	Chr08	15869399	15872188	+	CYP81BQ6	GrCYP81BQ6.1	536	FGLGRRAC	464	NETLRLYP	385	1	i12-29o
Gorai.008G258700.1	Chr08	60432969	60435092	-	CYP76G21	GrCYP76G21	513	FGSGRRMC	444	KETLRLHP	367	1	i5-22o
Gorai.008G276600.1	Chr08	1435826	1439175	+	CYP714A30	GrCYP714A30.3	522	FGVGSRLC	454	QEALRLYP	378	1	i7-29o
Gorai.008G279500.1	Chr08	43092329	43094596	-	CYP87A56	GrCYP87A56	474	FGGGMRFC	413	NETVRLAN	340	1	i2-21o
Gorai.008G284200.1	Chr08	13872543	13874186	+	CYP96Z1	GrCYP96Z1	498	FSAGPRIC	437	CETLRLFP	359	1	i5-24o
Gorai.008G284300.1	Chr08	53673378	53675071	+	CYP83F64	GrCYP83F64	485	FGAGRRVC	433	KETFRLQP	357	0	o
Gorai.008G284500.1	Chr08	48326	52484	+	CYP98A95	GrCYP98A95.1	509	FGAGRRVC	433	KEALRLHP	357	1	i2-24o
Gorai.008G284600.1	Chr08	5843	8827	+	CYP71BG3b	GrCYP71BG3b	504	FGGGRRGC	435	KEAMRLHP	359	1	i7-24o
Gorai.009G020500.1	Chr09	39723903	39725752	+	CYP712C5	GrCYP712C5	512	FGSGRRAC	444	KEILRLHP	369	1	i13-30o
Gorai.009G020500.2	Chr09	39709869	39716575	+	CYP712C7	GrCYP712C7	453	FGNGRRGC	369	KEILRLHP	294	1	i5-24o
Gorai.009G035000.1	Chr09	1088255	1090539	-	CYP82D219P	GrCYP82D219P	254	IIVGKRIP	204	KECLTTND	97	1	o10-29i
Gorai.009G044000.1	Chr09	14602570	14604090	-	CYP96A132	GrCYP96A132	506	FNAGPRIC	445	CEALRLYP	367	1	i2-21o
Gorai.009G044000.2	Chr09	54901164	54903091	+	CYP71AN49	GrCYP71AN49	410	INKIRRAC	167	KETLRLHP	368	0	o
Gorai.009G066700.1	Chr09	47552944	47554873	+	CYP71BE80	GrCYP71BE80	487	FGAGRRIC	446	KETMRLHP	370	1	o10-32i
Gorai.009G066700.2	Chr09	19849143	19851279	+	CYP89A157	GrCYP89A157	517	FGVGRRIC	454	LEGLRRHP	371	1	i5-27o
Gorai.009G071700.1	Chr09	66651199	66653034	+	CYP706Q1	GrCYP706Q1	522	FGSGRRMC	453	KETLRLHP	377	1	i21-43o
Gorai.009G071700.2	Chr09	66628119	66629979	+	CYP706Q10a	GrCYP706Q10a	522	FGSGRRMC	453	KETLRLHP	377	1	i21-43o
Gorai.009G086900.1	Chr09	4469778	4472273	+	CYP704A127	GrCYP704A127.4	485	YGRGAHIE	151	TETLRLYP	420	2	o32-54,i59-81o
Gorai.009G092900.1	Chr09	3127336	3132500	+	CYP749A199	GrCYP749A199	514	FGFGPRSC	465	NETLRLYG	388	1	i20-42o
Gorai.009G101200.1	Chr09	8441201	8444166	-	CYP734A57	GrCYP734A57.1	454	FGLGVRTC	453	NESLRLYP	377	0	o
Gorai.009G113900.1	Chr09	58744794	58747084	-	CYP93A87	GrCYP93A87	505	FGSGRRSC	439	KETLRLHP	361	1	i7-26o
Gorai.009G120200.1	Chr09	2938865	2940806	-	CYP714E35	GrCYP714E35	514	FGFGPHTC	455	NETLRLYP	379	1	i5-27o
Gorai.009G140600.1	Chr09	44812797	44814891	-	CYP86A132	GrCYP86A132	527	FNAGPRIC	450	SETLRLYP	371	1	i7-24o
Gorai.009G140600.2	Chr09	7422329	7424516	-	CYP86A133	GrCYP86A133	528	FNAGPRIC	450	SETLRLYP	371	1	i7-24o
Gorai.009G155600.1	Chr09	54469534	54474523	-	CYP88A77	GrCYP88A77.2	499	FGAGSRLC	436	DETLRLIT	365	1	i5-27o
Gorai.009G155800.1	Chr09	54469534	54474523	-	CYP88A77	GrCYP88A77.1	499	FGAGSRLC	436	DETLRLIT	365	1	i5-27o
Gorai.009G196300.1	Chr09	51944788	51945689	-	CYP72A871P	GrCYP72A871P	237	SGAGMSMA	118	LEVMRLYP	192	0	o
Gorai.009G203900.1	Chr09	41014659	41017220	-	CYP85A41	GrCYP85A41.6	494	FGGGTRQC	408	FETSRLAT	336	2	o4-22,i172-194o
Gorai.009G204000.1	Chr09	41014387	41017220	-	CYP85A41	GrCYP85A41.5	465	FGGGTRQC	327	FETSRLAT	255	1	i2-24o
Gorai.009G206500.1	Chr09	42492182	42494704	-	CYP78A197	GrCYP78A197.3	531	FGSGRRTC	468	KEVLRLHP	387	1	i25-47o
Gorai.009G206600.1	Chr09	12962565	12965526	+	CYP92A28	GrCYP92A28	511	FGAGRRMC	439	KETMRLHP	363	1	i5-24o
Gorai.009G206700.1	Chr09	50866449	50869198	-	CYP76Y16	GrCYP76Y16	501	FGAGRRIC	439	KETMRLHP	363	0	o
Gorai.009G206900.1	Chr09	53512555	53514321	+	CYP76F91	GrCYP76F91	446	FGSGRRIC	406	KETMRLHP	330	1	i7-24o
Gorai.009G207000.1	Chr09	23026578	23028912	-	CYP82D147	GrCYP82D147	526	FGSGRRVC	458	KETTRLYP	380	1	i9-31o
Gorai.009G207100.1	Chr09	39603016	39605133	+	CYP78A192	GrCYP78A192	518	FGSGRRVC	455	KETLRVHP	378	2	o20-42,i49-71o
Gorai.009G207500.1	Chr09	1221801	1224847	+	CYP701A18	GrCYP701A18.3	504	FGAGKRAC	283	HETLRKHS	208	1	i5-22o
Gorai.009G211900.1	Chr09	53572381	53574142	-	CYP83F44	GrCYP83F44	505	FGAGRRVC	439	KETFRLQT	363	1	i2-21o
Gorai.009G216500.1	Chr09	11664349	11666682	+	CYP82L32	GrCYP82L32	521	FSSGRRSC	445	KETLRLYP	367	0	o
Gorai.009G217000.1	Chr09	1113155	1114953	-	CYP82D321	GrCYP82D321	525	FSSGRRMC	454	KETLRLYP	376	1	i7-29o
Gorai.009G274700.1	Chr09	56035884	56039116	+	CYP706P4	GrCYP706P4	524	FGSGRRIC	455	KETLRIHP	377	2	o15-37,i49-68o
Gorai.009G274900.1	Chr09	32957667	32959689	+	CYP71AP34	GrCYP71AP34	508	FGAGRRSC	442	KETWRLHP	366	0	o
Gorai.009G276900.1	Chr09	1103552	1105532	-	CYP82D220	GrCYP82D220	525	FGSGRRMC	454	KETLRLYP	376	1	i7-29o
Gorai.009G293900.1	Chr09	19902103	19904493	-	CYP84A78	GrCYP84A78	515	FGSGRRSC	445	KETLRLHP	369	1	i12-29o
Gorai.009G310200.1	Chr09	3568023	3575406	+	CYP72A502bP	GrCYP72A502bP	184	FEEGKRIF	54	KESLREMI	102	0	o
Gorai.009G331600.1	Chr09	47858102	47859291	+	CYP71BE75bP	GrCYP71BE75bP	347	FGAGRRMC	299	KETMRLHP	223	0	o
Gorai.009G358400.1	Chr09	50249420	50252176	-	CYP88A79	GrCYP88A79.3	482	FGAGSRIC	392	DETLRRAS	321	1	i2-24o
Gorai.009G358600.1	Chr09	50249420	50252176	-	CYP88A79	GrCYP88A79.4	482	FGAGSRIC	343	DETLRRAS	272	1	i2-24o
Gorai.009G358600.2	Chr09	9618655	9620814	+	CYP81AT11P	GrCYP81AT11P	367	MVAGKRYY	169	DEVQRLLV	132	0	o
Gorai.009G358800.1	Chr09	20067928	20072197	+	CYP721A90	GrCYP721A90	453	TGPGYRPF	40	DETLRLYP	371	1	i5-27o
Gorai.009G359000.1	Chr09	50249402	50252214	-	CYP88A79	GrCYP88A79.1	397	FGAGSRIC	428	DETLRRAS	357	0	o
Gorai.009G359000.2	Chr09	50249411	50252176	-	CYP88A79	GrCYP88A79.2	413	FGAGSRIC	425	DETLRRAS	354	0	o
Gorai.009G359100.1	Chr09	46904990	46909249	+	CYP88P1	GrCYP88P1	482	FSTGSSTC	422	DETLRIGA	351	1	i5-22o
Gorai.009G405300.1	Chr09	4469778	4472273	+	CYP704A127	GrCYP704A127.3	499	YGRGAHIE	151	TETLRLYP	420	2	o32-54,i59-81o
Gorai.009G409000.1	Chr09	53047467	53049398	+	CYP706D9	GrCYP706D9	502	FGSGRRMC	433	KETLRLHP	355	2	o4-23,i160-182o
Gorai.009G424500.1	Chr09	42516677	42518699	+	CYP71BE79	GrCYP71BE79.1	508	FGAGRRMC	437	RETFRIRP	361	0	o
Gorai.009G424600.1	Chr09	61981874	61985074	+	CYP71BG3a	GrCYP71BG3a	504	FGGGRRGC	437	KEAMRLHP	361	1	i9-26o
Gorai.009G424700.1	Chr09	20549992	20551603	-	CYP94A72	GrCYP94A72	507	FQAGPRLC	442	CECMRLYP	360	1	i7-24o
Gorai.009G424800.1	Chr09	54349230	54351422	-	CYP77A39	GrCYP77A39	505	FGVGRRIC	440	KELLRRHP	360	1	i5-22o
Gorai.009G424900.1	Chr09	42516748	42518571	+	CYP71BE79	GrCYP71BE79.2	508	FGAGRRMC	436	RETFRIRP	360	0	o
Gorai.009G434800.1	Chr09	53598219	53600267	-	CYP83F46	GrCYP83F46	491	FGAGRRVC	437	KETFRLQA	361	1	i5-22o
Gorai.010G008600.1	Chr10	47108263	47110154	+	CYP71BE70bP	GrCYP71BE70bP	209	FGAGRRIC	212	GETDRIVG	119	1	o5-22i
Gorai.010G013600.1	Chr10	6403456	6405568	-	CYP78A193	GrCYP78A193	537	FGAGRRVC	469	KETLRIHP	391	1	i29-51o
Gorai.010G014200.1	Chr10	5088970	5091231	-	CYP76AG4	GrCYP76AG4.1	241	FGTGRRSC	458	KEVFRLHP	382	1	o15-37i
Gorai.010G014200.2	Chr10	5088986	5091200	-	CYP76AG4	GrCYP76AG4.2	527	FGTGRRSC	364	KEVFRLHP	288	1	o15-37i
Gorai.010G014200.3	Chr10	28098578	28100519	+	CYP77A40	GrCYP77A40	519	FGAGRRIC	453	KEVLRKHP	374	1	i13-35o
Gorai.010G014200.4	Chr10	18739365	18742120	-	CYP78A194	GrCYP78A194	530	FGSGRRAC	466	KEVLRLHP	383	1	i26-48o
Gorai.010G014300.1	Chr10	34901716	34904005	+	CYP78A196	GrCYP78A196	533	FGSGRRTC	470	KEVLRLHP	387	1	i26-48o
Gorai.010G014400.1	Chr10	8512466	8515025	+	CYP78A198	GrCYP78A198	540	FGSGRRTC	471	KEVLRLHP	390	1	i25-47o
Gorai.010G014500.1	Chr10	42492093	42495149	-	CYP78A197	GrCYP78A197.1	537	FGSGRRTC	468	KEVLRLHP	387	1	i25-47o
Gorai.010G014600.1	Chr10	36880573	36882707	+	CYP78A199	GrCYP78A199	533	FGSGRRTC	468	KEVLRLHP	387	1	i26-48o
Gorai.010G014700.1	Chr10	42492156	42494915	-	CYP78A197	GrCYP78A197.2	537	FGSGRRTC	468	KEVLRLHP	387	1	i25-47o
Gorai.010G014800.1	Chr10	45547510	45549561	+	CYP715A39	GrCYP715A39	521	FGFGGRMC	462	KEVLRLYS	385	1	i13-35o
Gorai.010G014900.1	Chr10	53988495	53990766	-	CYP78A201	GrCYP78A201	530	FGSGRRSC	467	KEVLRLHP	385	1	i26-48o
Gorai.010G015000.1a	Chr10	9633456	9635234	+	CYP81AT6	GrCYP81AT6	326	FGLGRRAC	255	LEAQRLHP	183	0	o
Gorai.010G015000.1b	Chr10	9602033	9604342	+	CYP81AT5	GrCYP81AT5	501	FGLGRRAC	430	LEAQRLYP	358	1	i7-24o
Gorai.010G015100.1	Chr10	43539662	43540971	-	CYP706B29P	GrCYP706B29P	362	SSANLNAC	159	KEVVRDND	107	1	i21-43o
Gorai.010G015200.1	Chr10	55428301	55433223	-	CYP715A40	GrCYP715A40	519	FGFGGRMC	460	KEVLRLYS	383	1	i13-35o
Gorai.010G015300.1	Chr10	48709672	48712714	-	CYP78A191	GrCYP78A191	524	FGSGRRVC	457	KEVLRMHP	380	2	o4-22,i29-51o
Gorai.010G015400.1	Chr10	53490999	53492573	+	CYP76F90	GrCYP76F90	430	FGGGRRIC	422	KETMRLHP	346	1	i7-24o
Gorai.010G015900.1	Chr10	1090932	1094092	-	CYP728D32	GrCYP728D32.2	474	PPSFKRIC	103	PEMLKQYV	136	0	o
Gorai.010G015900.2	Chr10	61845984	61850808	+	CYP90A47	GrCYP90A47.3	473	FGGGPRLC	245	NETLRVAN	171	1	i2-21o
Gorai.010G015900.3	Chr10	33569217	33570140	+	CYP82C140P	GrCYP82C140P	307	FGNNQLLH	52	EESRRFQK	206	2	i7-26,o218-240i
Gorai.010G024400.1	Chr10	1076607	1079103	-	CYP82D150	GrCYP82D150	526	FGSGRRMC	455	KETLRLYP	377	1	i7-29o
Gorai.010G065800.1	Chr10	8364050	8366388	-	CYP736A189	GrCYP736A189	519	FGTGRRGC	452	KESFRLHP	375	1	i13-35o
Gorai.010G065800.2	Chr10	47617079	47619057	-	CYP736A194	GrCYP736A194	499	FGAGRRGC	432	KESFRLHP	356	1	i7-24o
Gorai.010G088700.1	Chr10	773760	781101	-	CYP90C25	GrCYP90C25.2	324	FGGGQRLC	456	SETLRMAN	383	0	o
Gorai.010G130700.1	Chr10	47217558	47219641	+	CYP71BE72	GrCYP71BE72.1	471	FGAGRRVC	437	KETLRLHP	361	0	o
Gorai.010G166000.1	Chr10	54944808	54946763	+	CYP71AN48	GrCYP71AN48	509	FGFGRRSC	442	KETLRLHP	366	1	i9-28o
Gorai.010G166100.1	Chr10	1221707	1224905	+	CYP701A18	GrCYP701A18.1	344	FGAGKRAC	441	HETLRKHS	366	0	o
Gorai.010G175000.1	Chr10	773813	781095	-	CYP90C25	GrCYP90C25.3	485	FGGGQRLC	456	SETLRMAN	383	1	i17-34o
Gorai.010G178900.1	Chr10	12408087	12410230	+	CYP71BE174P	GrCYP71BE174P.2	360	LGAGRRIC	231	KETLRLHP	155	0	o
Gorai.010G190900.1	Chr10	48354490	48356927	-	CYP707A141	GrCYP707A141.2	398	FSQGQYHA	142	QETLRVAS	359	1	o23-45i
Gorai.010G190900.2	Chr10	48354490	48356654	-	CYP707A141	GrCYP707A141.3	466	FGNGTHSC	325	QETLRVAS	255	1	o30-52i
Gorai.010G198500.1	Chr10	66526334	66528736	+	CYP706Q14P	GrCYP706Q14P	331	CAGWSWGC	13	REVRRMVK	172	1	i21-43o
Gorai.010G215500.1	Chr10	16399713	16403076	-	CYP707A139	GrCYP707A139	471	FGSGVHAC	410	GETLQLYS	47	1	o4-21i
Gorai.010G215500.2	Chr10	3822546	3825714	-	CYP707A268	GrCYP707A268.1	476	FGNGVHAC	414	GETLQLYS	49	1	i5-24o
Gorai.010G215500.4	Chr10	3822546	3826009	-	CYP707A268	GrCYP707A268.4	477	FGNGVHAC	413	GETLQLYS	49	1	i5-24o
Gorai.010G218500.1	Chr10	43609010	43610970	+	CYP706B1bP	GrCYP706B1bP	231	FGSGRRMC	405	KEAFRLHP	327	1	i21-43o
Gorai.010G252700.1	Chr10	12456157	12458595	-	CYP71BE176P	GrCYP71BE176P.1	381	FGAGRRIC	392	KETLRLHP	316	0	o
Gorai.011G006100.1	Chr11	27943282	27946014	+	CYP749A16	GrCYP749A16	520	FGMGPRAC	457	NETLRLYT	380	1	i12-34o
Gorai.011G015500.1	Chr11	42679063	42686505	-	CYP97B47	GrCYP97B47.3	579	FEAEHRST	258	HGSLRTSD	16	0	o
Gorai.011G015500.2	Chr11	12382000	12383445	-	CYP71BE179P	GrCYP71BE179P	394	FGAGRRIC	352	KEAERFYP	325	0	o
Gorai.011G016000.1	Chr11	12408087	12410230	+	CYP71BE174P	GrCYP71BE174P.1	296	LGAGRRIC	294	KETLRLHP	218	0	o
Gorai.011G060100.1	Chr11	53182932	53185762	-	CYP86A134	GrCYP86A134	562	FNAGPRIC	450	SETLRLYP	371	1	i5-27o
Gorai.011G060100.2	Chr11	773760	781101	-	CYP90C25	GrCYP90C25.1	346	FGGGQRLC	456	SETLRMAN	383	0	o
Gorai.011G099800.1	Chr11	5773510	5778324	+	CYP87B28	GrCYP87B28	444	FGGGNRTC	385	NESLRLAN	312	0	o
Gorai.011G113900.1	Chr11	6772774	6775288	+	CYP704A263	GrCYP704A263.1	382	FQAGPRIC	483	TETLRLYP	405	1	o4-26i
Gorai.011G157400.1	Chr11	34508838	34512503	+	CYP78A190	GrCYP78A190	524	FGSGRRVC	478	KEVLRLHP	401	1	i27-49o
Gorai.011G158000.1	Chr11	43555977	43557689	+	CYP706B22	GrCYP706B22.2	468	FGSGRRRC	459	KETFRLHP	381	1	i21-43o
Gorai.011G207000.1	Chr11	43555910	43558697	+	CYP706B22	GrCYP706B22.1	469	FGSGRRRC	459	KETFRLHP	381	1	i21-43o
Gorai.011G209500.1	Chr11	3461832	3464362	-	CYP84A79	GrCYP84A79	517	FGSGRRSC	447	KETLRLHP	371	1	i13-30o
Gorai.011G224900.1	Chr11	57788882	57790696	+	CYP89A155	GrCYP89A155	509	FGVGRRIC	446	LEGLRRHP	368	1	i5-27o
Gorai.011G225000.1	Chr11	57794054	57796315	+	CYP89A156	GrCYP89A156	512	FGVGRRIC	449	LEGLRRHP	367	1	i5-24o
Gorai.011G225100.1	Chr11	1562169	1565412	-	CYP734A56	GrCYP734A56.2	524	FGPTVRLT	100	MENLKLLV	163	1	i7-29o
Gorai.011G225200.1	Chr11	7766587	7771897	-	CYP89A283	GrCYP89A283	417	FGVGKRMC	343	LESLRRHP	265	0	o
Gorai.011G225300.1	Chr11	41386504	41389234	+	CYP72A507	GrCYP72A507.1	411	FGWGPRIC	451	LEVMRLYP	376	0	o
Gorai.011G225400.1	Chr11	7293862	7296145	-	CYP714F8	GrCYP714F8	512	FGLGARVC	453	LEVLRLYP	377	1	i7-29o
Gorai.011G225500.1	Chr11	34170042	34172939	-	CYP714E37	GrCYP714E37.1	522	FGIGARIC	463	LETLRLYP	387	1	i7-29o
Gorai.011G227100.1	Chr11	6750274	6752370	+	CYP704A129	GrCYP704A129.1	387	FHAGPRIC	453	TETLRLYP	376	1	i5-27o
Gorai.011G229800.1	Chr11	51623133	51633327	+	CYP71AS22P	GrCYP71AS22P	438	FGADQLAL	372	KETLRLHP	324	0	o
Gorai.011G231100.1	Chr11	1175987	1177879	-	CYP82D110	GrCYP82D110	520	FGSGRRSC	452	KETLRMYP	374	1	i7-24o
Gorai.011G232300.1	Chr11	58282436	58286121	-	CYP727B4	GrCYP727B4.2	559	FGSGARAC	491	YESARVMP	388	1	i31-53o
Gorai.011G232500.1	Chr11	58282436	58286215	-	CYP727B4	GrCYP727B4.1	413	FGSGARAC	495	YESARVMP	388	0	o
Gorai.011G232600.1	Chr11	3458916	3461355	+	CYP749A201	GrCYP749A201	529	FGLGSRSC	466	NETLRLYP	389	1	i20-42o
Gorai.011G232700.1	Chr11	28304618	28306331	-	CYP78A195	GrCYP78A195	544	FGAGRRVC	473	KETLRLHP	391	1	i29-51o
Gorai.011G232800.1	Chr11	30560751	30563104	-	CYP86B32	GrCYP86B32	547	FNGGPRLC	475	SEALRLYP	398	1	i23-45o
Gorai.011G232900.1	Chr11	47440828	47446402	-	CYP97A50	GrCYP97A50.5	614	FGGGPRKC	491	NESLRLYP	414	0	o
Gorai.011G254100.1	Chr11	48309	52500	+	CYP98A95	GrCYP98A95.2	510	FGAGRRVC	432	KEALRLHP	356	1	i2-24o
Gorai.011G262400.1	Chr11	34170042	34172939	-	CYP714E37	GrCYP714E37.2	522	FGIGARIC	463	LETLRLYP	387	1	i7-29o
Gorai.011G272900.1	Chr11	15989671	15991727	-	CYP82D112	GrCYP82D112	522	FGSGRRSC	454	KETLRLYP	376	2	o4-23,i227-246o
Gorai.011G273000.1	Chr11	1066092	1068194	-	CYP82D148	GrCYP82D148.1	328	IIVGKRIS	208	KETLRLYP	381	1	o10-32i
Gorai.011G273100.1	Chr11	20304658	20306540	+	CYP82D144	GrCYP82D144	407	IGGDERLM	248	KETLRLYP	375	2	o10-27,i314-336o
Gorai.011G286100.1	Chr11	25518040	25519986	-	CYP79A115	GrCYP79A115	532	FSTGRRGC	443	RKAFRIHP	363	1	i21-43o
Gorai.011G286100.2	Chr11	1022144	1023724	-	CYP94F9	GrCYP94F9	531	FHCGPRTC	455	SESLRLFP	376	2	o10-32,i316-338o
Gorai.011G286100.3	Chr11	51466408	51468191	+	CYP86C17	GrCYP86C17	525	FNAGPRLC	461	SESLRLYP	384	2	o15-37,i49-71o
Gorai.011G288200.1	Chr11	41014387	41017220	-	CYP85A41	GrCYP85A41.1	437	FGGGTRQC	436	FETSRLAT	364	1	i2-24o
Gorai.012G012600.1	Chr12	2641508	2643060	+	CYP96K1a	GrCYP96K1a	511	FLAGPRIC	450	CETLRLYP	372	1	i5-24o
Gorai.012G012600.2	Chr12	2657538	2659491	+	CYP96K1b	GrCYP96K1b.1	494	FLAGPRIC	450	CETLRLYP	372	1	i5-23o
Gorai.012G012600.3	Chr12	2657538	2662658	+	CYP96K1b	GrCYP96K1b.2	511	FLAGPRIC	450	CETLRLYP	372	1	i5-23o
Gorai.012G012600.6	Chr12	2672839	2674401	-	CYP96K1c	GrCYP96K1c	511	FLTGPRIC	450	CETLRLYP	372	1	i5-23o
Gorai.012G021500.1	Chr12	6794283	6795818	-	CYP86A129	GrCYP86A129	511	FNAGPRTC	449	TETLRLYP	369	1	i7-24o
Gorai.012G021600.1	Chr12	42678958	42686557	-	CYP97B47	GrCYP97B47.1	407	FGGGPRKC	515	VESLRLYP	411	0	o
Gorai.012G021600.2	Chr12	42679063	42686505	-	CYP97B47	GrCYP97B47.2	498	FGGGPRKC	434	VESLRLYP	330	0	o
Gorai.012G021700.1	Chr12	1010736	1012694	+	CYP74A60	GrCYP74A60	495	LTGGYRIL	124	YEAFRIEP	356	0	o
Gorai.012G023800.1	Chr12	54603259	54605218	+	CYP714E34	GrCYP714E34	510	FGTGPRSC	451	YETLRLYP	375	1	i5-27o
Gorai.012G041800.1	Chr12	1435764	1439175	+	CYP714A30	GrCYP714A30.2	522	FGVGSRLC	462	QEALRLYP	386	1	i7-29o
Gorai.012G065900.1	Chr12	61952148	61955415	+	CYP707A138	GrCYP707A138.2	441	FGNGVHAC	411	GETLQLYS	46	1	i3-21o
Gorai.012G087200.1	Chr12	2895495	2896775	-	CYP71AN71P	GrCYP71AN71P	401	FGVGRRSC	285	TETLALVS	74	0	o
Gorai.012G133700.1	Chr12	15869399	15872188	+	CYP81BQ6	GrCYP81BQ6.2	536	FGLGRRAC	439	NETLRLYP	360	1	i12-29o
Gorai.012G164300.1	Chr12	34388631	34390630	-	CYP82D109	GrCYP82D109	522	FGSGRRSC	454	KETLRMYP	376	1	i7-24o
Gorai.012G164400.1	Chr12	15982718	15984960	-	CYP82D113	GrCYP82D113	522	FGSGRRSC	454	KETLRMYP	376	1	i7-24o
Gorai.012G164500.1	Chr12	10560207	10562589	+	CYP722C9	GrCYP722C9.2	489	VKFDKMVC	164	KETLRMAN	358	1	i12-34o
Gorai.012G165100.1	Chr12	10560064	10562881	+	CYP722C9	GrCYP722C9.1	382	FGAGPRTC	428	KETLRMAN	358	1	i12-34o
Gorai.012G175600.1	Chr12	12456157	12458595	-	CYP71BE176P	GrCYP71BE176P.2	381	FGAGRRIC	310	KETLRLHP	234	0	o
Gorai.012G185300.1	Chr12	46582316	46585608	-	CYP76F176P	GrCYP76F176P	395	FGAGRRIC	302	KETFRMHP	241	0	o
Gorai.013G000900.1	Chr13	2617942	2620104	+	CYP72D17	GrCYP72D17	517	FSWGPRTC	458	YEVLRLYP	382	1	i7-29o
Gorai.013G000900.2	Chr13	1133766	1140314	-	CYP82D336	GrCYP82D336	305					1	i7-26o
Gorai.013G013700.1	Chr13	45231431	45233509	+	CYP79D65	GrCYP79D65	536	FGRGRRGC	472	REAFRLHP	391	1	i7-29o
Gorai.013G025300.1	Chr13	43510350	43513300	+	CYP706B20	GrCYP706B20	439	LWLGNKLC	92	KETFRLHP	385	1	i21-43o
Gorai.013G025400.1	Chr13	58266484	58269567	+	CYP706P1	GrCYP706P1	533	FGSGRRIC	464	KETFRIHP	386	1	i23-45o
Gorai.013G032800.1	Chr13	61089865	61093531	-	CYP734A59	GrCYP734A59	517	FGLGVRTC	458	NESLRLYP	382	1	i12-34o
Gorai.013G041300.1	Chr13	2111397	2112949	-	CYP83F65	GrCYP83F65	454	FGAGRRVC	346	KETFRLQP	270	0	o
Gorai.013G041900.1	Chr13	2032283	2032962	-	CYP83F72P	GrCYP83F72P	191	FGAGRRVC	127	KETFRLQP	51	0	o
Gorai.013G044100.1	Chr13	38454969	38457298	-	CYP93B35	GrCYP93B35	519	FGTGRRGC	449	KESFRLHP	364	1	i7-29o
Gorai.013G044100.2	Chr13	53981225	53983280	+	CYP94D66	GrCYP94D66	502	FHGGPRMC	442	SESLRLYP	364	1	i5-27o
Gorai.013G044100.3	Chr13	27589691	27591582	-	CYP71AN53	GrCYP71AN53	508	FGIGRRTC	442	KETLRLHP	365	1	i13-35o
Gorai.013G044100.4	Chr13	61867520	61869248	-	CYP77B27	GrCYP77B27	506	FGAGRRIC	445	KETFRRHP	365	0	o
Gorai.013G069900.1	Chr13	15803826	15806148	+	CYP721A94	GrCYP721A94	505	FGLGPRIC	444	NETLRLYS	372	1	i7-29o
Gorai.013G071400.1	Chr13	56027611	56030184	+	CYP706P2	GrCYP706P2	531	FGSGRRIC	462	KETLRIHP	384	1	i20-42o
Gorai.013G088800.1	Chr13	59363884	59366084	+	CYP94C83	GrCYP94C83	500	FQGGFRVC	438	YESMRLYP	360	1	i13-35o
Gorai.013G095000.1	Chr13	50864550	50866120	-	CYP76Y17	GrCYP76Y17	499	FGAGRRLC	432	KETLRLHP	356	0	o
Gorai.013G095400.1	Chr13	3154960	3157014	+	CYP749A196	GrCYP749A196	516	FGLGPRTC	437	NETLRLYG	360	1	i7-29o
Gorai.013G097000.1	Chr13	56031566	56033716	+	CYP706P3	GrCYP706P3	350	FGSGRRIC	281	KETLRIHP	203	0	o
Gorai.013G101100.1	Chr13	16026638	16028703	+	CYP82D111	GrCYP82D111	523	FGSGRRSC	455	KETFRMYP	377	1	i7-24o
Gorai.013G103400.1	Chr13	22676746	22678505	-	CYP736A338b	GrCYP736A338b	490	FGLGRRVC	428	RETLRLYP	351	1	i7-24o
Gorai.013G103500.1	Chr13	17407	18398	-	CYP706Q10cP	GrCYP706Q10cP	316	FNTITSTX	296	REVRRMVK	148	0	o
Gorai.013G103800.1	Chr13	60476101	60480911	-	CYP97C38	GrCYP97C38.1	447	FSGGPRKC	479	TESLRLYP	401	0	o
Gorai.013G135000.1	Chr13	42034128	42036063	+	CYP71BE155	GrCYP71BE155	503	FGAGRRIC	461	KETLRLHP	385	1	i21-43o
Gorai.013G137300.1	Chr13	2485806	2487961	-	CYP84A80	GrCYP84A80	544	FGSGRRSC	456	KETLRLHP	380	1	i12-34o
Gorai.013G141500.1	Chr13	10622343	10625958	-	CYP90D39	GrCYP90D39.1	483	FGGGQRLC	429	TEALRMGN	353	1	i7-26o
Gorai.013G153200.1	Chr13	37669340	37671429	+	CYP96A133	GrCYP96A133	507	FNAGPRTC	446	CEALRLYP	368	0	o
Gorai.013G154300.1	Chr13	37470370	37474910	+	CYP87B31	GrCYP87B31.6	467	PGTAFYKC	217	EERMNLYP	240	2	o5-24,i271-293o
Gorai.013G154300.2	Chr13	9854839	9858384	-	CYP85A1	GrCYP85A1.1	274	FGGGTRQC	436	FETSRLAT	364	0	o
Gorai.013G180200.1	Chr13	41520622	41522202	+	CYP94C87	GrCYP94C87	526	FQAGFRVC	460	YESMRLYP	382	1	i31-53o
Gorai.013G180200.2	Chr13	60454083	60455817	+	CYP94C88	GrCYP94C88	489	FQAGFRVC	422	YESMRLYP	344	1	i7-24o
Gorai.013G180200.3	Chr13	2951876	2955594	+	CYP749A65	GrCYP749A65	515	FGLGPRSC	452	YETLRLYG	375	1	i7-29o
Gorai.013G180200.4	Chr13	2938564	2941500	+	CYP749A71	GrCYP749A71	516	FGLGPRSC	453	YETLRLYG	376	1	i7-29o
Gorai.013G180200.5	Chr13	9315143	9316966	-	CYP81AT1	GrCYP81AT1	500	FGLGRRSC	431	YETLRLYP	356	1	i7-24o
Gorai.013G180200.6	Chr13	15666530	15676004	+	CYP74B25	GrCYP74B25.1	512	YTGNTRVC	149	YETLRMNP	383	0	o
Gorai.013G180800.1	Chr13	3047432	3048880	-	CYP96K7P	GrCYP96K7P	374	FLAGPRIC	313	CETLRLYP	245	0	o
Gorai.013G180900.1	Chr13	9854839	9858452	-	CYP85A1	GrCYP85A1.2	437	FGGGTRQC	409	FETSRLAT	337	1	i3-25o
Gorai.013G181700.1	Chr13	37470471	37475676	+	CYP87B31	GrCYP87B31.3	445	FGGGNRAC	385	EERMNLYP	240	2	o5-24,i258-280o
Gorai.013G233300.1	Chr13	47991900	47993411	-	CYP710A70b	GrCYP710A70b	478	FGAGPHQC	433	READRFKP	406	1	i7-29o
Gorai.013G233300.2	Chr13	50382075	50384372	-	CYP79A116	GrCYP79A116	555	FGTGRRGC	485	REAFRLHP	406	1	i30-52o
Gorai.013G233400.1	Chr13	3518798	3520676	+	CYP749A202	GrCYP749A202	547	FGLGSRSC	484	NETLRLYP	407	1	i7-29o
Gorai.013G271700.1	Chr13	43545631	43548906	+	CYP706B21	GrCYP706B21	502	FGSGRRKC	433	KETFRLHP	355	1	i21-43o
Gorai.N008800.1	scaffold_19	47527869	47529489	-	CYP71BE181	GrCYP71BE181	483	FGAGRRIC	437	KETLRLHP	361	0	o
Gorai.N008900.1	scaffold_19	53629347	53631392	-	CYP83F47	GrCYP83F47	503	FGAGRRVC	437	KETFRLHP	361	2	o5-22,i298-320o
Gorai.N016100.1	scaffold_122	41014295	41017284	-	CYP85A41	GrCYP85A41.2	384	FGGGTRQC	408	FETSRLAT	336	0	o
Probable pseudogene

## Sheet: Dataset S2
Supplementary Dataset 2 – Identification and characterization of CYP450 in Gossypium herbaceum genome with haeme binding and ERR triad motif position.
GeneID	Chr	Start	End	Strand	CYP name	rename_for_variants	Protein length	Haeme Binding Motif	Motif Pos	ERR Triad Motif	ERR Triad Pos	TM helices	Topology
Ghe01G04380	Chr01	4079023	4084409	+	CYP72A502	GheCYP72A502	623	FGWGPRIC	561	EVLRLYPP	486	1	i105-127o
Ghe01G04390	Chr01	4089749	4091633	+	CYP72A503b	GheCYP72A503b	518	FGWGPRIC	456	EVLRLYPP	381	1	i5-27o
Ghe01G04400	Chr01	4099105	4100988	+	CYP72A503a	GheCYP72A503a	506	FGWGPRIC	444	EVLRLYPP	369	1	i13-32o
Ghe01G04410	Chr01	4121729	4123533	+	CYP72A872	GheCYP72A872	380	FGWGPRIC	338	EVLRLYPS	263	0	o
Ghe01G04420	Chr01	4131664	4133549	+	CYP72A504	GheCYP72A504	518	FGWGPRIC	456	EVLRLYPS	381	1	i13-32o
Ghe01G04440	Chr01	4139295	4141261	+	CYP72A848	GheCYP72A848	518	FGWGPRIC	456	EVLRLYPP	381	1	i5-27o
Ghe01G05760	Chr01	6738465	6741598	-	CYP87B29	GheCYP87B29	479	FGGGNRPC	421	ETLRLENL	349	2	o4-23,i277-299o
Ghe01G06760	Chr01	8046670	8048456	-	CYP736A332	GheCYP736A332	507	FGTGRRGC	440	ESFRLHPV	364	1	i7-24o
Ghe01G06770	Chr01	8056728	8058547	-	CYP736A190	GheCYP736A190	519	FGTGRRGC	452	ESFRLHPV	376	1	i13-35o
Ghe01G08370	Chr01	11366312	11370260	-	CYP728B54	GheCYP728B54	455	FGGGPRIC	489	ETLRMFPP	418	3	i5-23,o27-49,i58-77o
Ghe01G09260	Chr01	12732076	12733683	-	CYP71BE64	GheCYP71BE64	511	FGAGRRIC	441	ETLRLHNP	367	1	i5-27o
Ghe01G09290	Chr01	12762638	12764259	-	CYP71BE165P	GheCYP71BE165P	305	FGAGRRIC	301	ETLRLHPP	227	2	o5-24,i307-329o
Ghe01G09300	Chr01	12797382	12799125	-	CYP71BE65	GheCYP71BE65	507	FGGGRRMC	437	ETLRLHPP	362	1	i7-24o
Ghe01G09320	Chr01	12895113	12896745	-	CYP71BE66	GheCYP71BE66	502	FGAGRRMC	433	ETLRLHPP	358	1	i5-22o
Ghe01G09340	Chr01	13068884	13070498	-	CYP71BE67	GheCYP71BE67	464	FGAGRRIC	435	ETLRLHPP	360	1	i5-22o
Ghe01G09350	Chr01	13236617	13238307	-	CYP71BE154	GheCYP71BE154	228	FGAGRRIC	418	ETLRLHPP	343	0	o
Ghe01G09370	Chr01	13293285	13294892	-	CYP71BE179	GheCYP71BE179	523	FGAGRRIC	437	ETLRLHPP	362	1	i7-26o
Ghe01G09380	Chr01	13313084	13325691	-	CYP71BE68	GheCYP71BE68	330	FGAGSRIC	429	ETLRLHPP	354	1	i7-26o
Ghe01G09400	Chr01	13403539	13405219	-	CYP71BE177	GheCYP71BE177	504	FGAGRRMC	422	ETLRLHPP	347	1	i7-26o
Ghe01G13000	Chr01	26467613	26471638	+	CYP721A90	GheCYP721A90	504	YGLGPRFC	443	ETLRLYPP	372	1	i5-27o
Ghe01G13100	Chr01	26764827	26766470	+	CYP82D144	GheCYP82D144	520	FGSGRRMC	453	ETLRLYPA	376	1	i7-26o
Ghe01G21110	Chr01	107639861	107642867	-	CYP78A191	GheCYP78A191	526	FGSGRRVC	459	EVLRMHPP	383	2	o4-22,i29-51o
Ghe01G25110	Chr01	117837208	117839367	-	CYP93A87bP	GheCYP93A87bP	505	FGSGRRSC	422	ETLRLHPA	345	1	i7-26o
Ghe01G25120	Chr01	117869746	117871896	-	CYP93A87a	GheCYP93A87a	505	FGSGRRSC	439	ETLRLHPA	362	1	i7-26o
Ghe01G25140	Chr01	117895571	117897194	-	CYP93A88	GheCYP93A88	515	FGSGRRSC	446	ETLRLHPS	363	1	i7-26o
Ghe01G25160	Chr01	117919452	117921536	+	CYP712A11	GheCYP712A11	515	FGSGRRGC	450	ETLRLHPS	368	1	i12-29o
Ghe01G25370	Chr01	118252336	118254152	+	CYP98A94	GheCYP98A94	508	FGAGRRVC	409	EALRLHPP	334	0	o
Ghe01G26480	Chr01	120180821	120182038	+	CYP94C88	GheCYP94C88	405	FQAGFRVC	338	ESMRLYPP	261	0	o
Ghe02G02220	Chr02	2331713	2333424	-	CYP706B1	GheCYP706B1	536	FGSGRRMC	466	ETFRLHPP	389	1	i21-43o
Ghe02G02240	Chr02	2363886	2365555	-	CYP706B22	GheCYP706B22	529	FGSGRRRC	459	ETFRLHPP	382	1	i21-43o
Ghe02G02270	Chr02	2423992	2426161	+	CYP87A54	GheCYP87A54	472	FGGGLRFC	413	ETLQFFSP	43	1	i2-21o
Ghe02G02280	Chr02	2438270	2440416	+	CYP87A98	GheCYP87A98	471	FGGGMRFC	413	ETVRLANI	341	1	i2-21o
Ghe02G02290	Chr02	2453889	2456074	+	CYP87A94	GheCYP87A94	471	FGGGMRFC	413	ETVRLANI	341	1	i2-21o
Ghe02G02300	Chr02	2463369	2465571	+	CYP87A56	GheCYP87A56	474	FGGGMRFC	413	ETVRLANI	341	1	i2-21o
Ghe02G05950	Chr02	8059488	8062263	-	CYP707A144	GheCYP707A144	461	FGNGVHSC	401	ETLKLYKE	38	0	o
Ghe02G06410	Chr02	9057381	9062816	-	CYP87B31	GheCYP87B31	427	FGGGNRAC	404	ETLRLGNF	332	1	i5-27o
Ghe02G06630	Chr02	9755148	9756683	+	CYP86A128	GheCYP86A128	511	FNAGPRTC	449	ETLRLYPS	370	1	i7-24o
Ghe02G07070	Chr02	11267040	11268494	+	CYP94B68	GheCYP94B68	484	FQAGPRVC	422	ESMRLYPP	341	0	o
Ghe02G09260	Chr02	18271453	18273054	-	CYP71AP34	GheCYP71AP34	508	FGAGRRSC	442	ETWRLHPP	367	0	o
Ghe02G09300	Chr02	18318694	18327633	+	CYP71AN68	GheCYP71AN68	498	FGAGRRRC	450	ETLRLHAP	377	0	o
Ghe02G10860	Chr02	27955629	27957821	-	CYP78A194	GheCYP78A194	497	FGSGRRAC	433	EVLRLHPP	351	0	o
Ghe02G14410	Chr02	64411503	64413041	+	CYP89A152	GheCYP89A152	512	FGVGRRIC	446	EGLRRHPP	368	1	i5-27o
Ghe02G16940	Chr02	82431042	82432415	+	CYP89A294P	GheCYP89A294P	402	FGVGKRMC	366	ESLRRHPP	289	1	i136-158o
Ghe02G17490	Chr02	84722519	84724230	+	CYP78A193	GheCYP78A193	537	FGAGRRVC	469	ETLRIHPP	392	1	i29-51o
Ghe02G19820	Chr02	89826070	89829497	+	CYP81BA1	GheCYP81BA1	507	FGMGRRAC	405	ETLRLYPA	331	0	o
Ghe02G20150	Chr02	90273956	90275540	+	CYP83F50	GheCYP83F50	497	FGAGRRVC	431	ETFRLQPI	356	2	o4-21,i292-314o
Ghe02G20170	Chr02	90314050	90315635	+	CYP83F51	GheCYP83F51	487	FGAGRRAC	431	ETFRLQPI	356	2	o4-21,i292-314o
Ghe02G20190	Chr02	90345638	90347223	+	CYP83F66	GheCYP83F66	497	FGAGRRVC	431	ETFRLQPV	356	1	i2-21o
Ghe02G21590	Chr02	92085357	92091883	+	CYP90C25	GheCYP90C25	514	FGGGQRLC	425	ETLRMANI	353	1	i17-34o
Ghe03G03410	Chr03	2343815	2347640	-	CYP707A138	GheCYP707A138	393	FGNGVHAC	329	ESLRMASI	260	0	o
Ghe03G07640	Chr03	8887580	8889616	-	CYP51G32	GheCYP51G32	486	FGGGRHGC	422	EALRLHPP	342	1	i7-29o
Ghe03G10180	Chr03	18081440	18083164	+	CYP71AS20	GheCYP71AS20	452	FGGGRRIC	377	ETLRLHPP	302	0	o
Ghe03G10220	Chr03	18321388	18322962	-	CYP86C17	GheCYP86C17	524	FNAGPRLC	460	ESLRLYPS	384	1	i20-39o
Ghe03G14100	Chr03	43532214	43533874	-	CYP78A192	GheCYP78A192	518	FGSGRRVC	455	ETLRVHPP	379	2	o20-42,i49-71o
Ghe03G20320	Chr03	109421539	109423671	-	CYP81BQ6	GheCYP81BQ6	500	FGLGRRAC	428	ETLRLYPA	354	1	i5-22o
Ghe03G20350	Chr03	109525641	109527258	+	CYP81B88	GheCYP81B88	508	FGTGRRGC	437	ETFRMCPP	364	1	i5-24o
Ghe03G22750	Chr03	120152628	120155162	-	CYP733A1	GheCYP733A1	477	FGSGPRMC	419	ETLRRATI	350	1	i5-27o
Ghe03G27810	Chr03	128889416	128893246	-	CYP749A70	GheCYP749A70	499	FGLGPRNC	587	ETLRLYGP	511	0	o
Ghe03G27820	Chr03	128899605	128901482	-	CYP749A193	GheCYP749A193	516	FGLGPRNC	453	ETLRLYGP	377	1	i7-29o
Ghe03G27830	Chr03	128905371	128907241	-	CYP749A192	GheCYP749A192	516	FGLGPRNC	453	ETLRLYGP	377	1	i7-29o
Ghe03G27840	Chr03	128910380	128912426	-	CYP749A197	GheCYP749A197	516	FGLGPRTC	441	ETLRLYSS	365	1	i7-29o
Ghe03G27850	Chr03	128931060	128931500	-	CYP749A349P	GheCYP749A349P	146	FGLGPRTC	83	EPLRLYGP	7	0	o
Ghe03G27860	Chr03	128933486	128935530	-	CYP749A221	GheCYP749A221	516	FGLGPRTC	453	ETLRLYGP	377	1	i7-29o
Ghe03G27870	Chr03	128938929	128940871	-	CYP749A220	GheCYP749A220	516	FGLGPRTC	453	ESLRLYGP	377	1	i7-29o
Ghe03G27880	Chr03	128956595	128958541	-	CYP749A198b	GheCYP749A198b	512	FGIGPRSC	453	ETLRLYSP	377	1	i7-29o
Ghe03G27890	Chr03	128965773	128967711	-	CYP749A198a	GheCYP749A198a	516	FGIGPRSC	453	ETSRLYGP	377	1	i7-29o
Ghe03G27900	Chr03	128975650	128978087	-	CYP749A68	GheCYP749A68	511	FGLGPRSC	435	ETLRLYGP	359	1	i11-33o
Ghe03G27910	Chr03	128983654	128984920	-	CYP749A67P	GheCYP749A67P	349	FGLGPRFC	283	ETLRLYGP	207	0	o
Ghe03G27920	Chr03	129012003	129014251	-	CYP749A66	GheCYP749A66	516	FGLGPRSC	453	ETLRLYGP	377	1	i7-29o
Ghe03G27930	Chr03	129020715	129022557	-	CYP749A72	GheCYP749A72	288	FGLGPRSC	343	ETLRLYGP	267	1	i3-25o
Ghe03G27950	Chr03	129075384	129078000	-	CYP749A206	GheCYP749A206	511	FGLGPRSC	452	ETLRLYGP	376	1	i7-29o
Ghe03G27960	Chr03	129089232	129091454	-	CYP749A218	GheCYP749A218	509	FGLGPRSC	453	ETLRLYGP	377	1	i7-29o
Ghe03G27970	Chr03	129096307	129098288	-	CYP749A195	GheCYP749A195	516	FGLGPRSC	453	ETLRLYGP	377	1	i7-29o
Ghe03G27980	Chr03	129100695	129102630	-	CYP749A209	GheCYP749A209	512	FGLGPRFC	449	ETLRLYGP	373	1	i3-25o
Ghe03G27990	Chr03	129104296	129106058	-	CYP749A208	GheCYP749A208	456	FGLGPRFC	393	ETLRLYGP	317	0	o
Ghe03G28000	Chr03	129129794	129130539	-	CYP749A238P	GheCYP749A238P	206	FGLGPRSC	126	ETLRLYSQ	50	0	o
Ghe03G28510	Chr03	129971519	129973423	+	CYP749A64	GheCYP749A64	478	FGLGLRSC	438	ETLRLYGP	362	1	i3-25o
Ghe03G30730	Chr03	132329770	132331336	-	CYP71BE69	GheCYP71BE69	495	FGAGRRIC	426	ESIRLHPA	352	0	o
Ghe04G01450	Chr04	1655181	1658346	+	CYP714A30	GheCYP714A30	477	FGVGSRLC	460	EALRLYPP	385	1	i7-29o
Ghe04G02360	Chr04	3054268	3055770	+	CYP96K5	GheCYP96K5	500	FIAGPRIC	439	ETLRLYPP	362	0	o
Ghe04G02420	Chr04	3119236	3119739	-	CYP96K3	GheCYP96K3	167	FLVGPRIC	106	ETLRLYPP	29	0	o
Ghe04G04850	Chr04	6807902	6809513	-	CYP718A21	GheCYP718A21	484	FGGGPRTC	420	ECMRLFPP	351	1	i7-25o
Ghe04G07520	Chr04	12829769	12832452	-	CYP724A1	GheCYP724A1	438	FGGGPRLC	409	ETLGFLKP	45	1	i2-24o
Ghe04G09980	Chr04	23229595	23231121	+	CYP94B69	GheCYP94B69	508	FQAGPRIC	445	ESMRLYPP	364	1	i7-29o
Ghe04G13090	Chr04	68211602	68213104	+	CYP94C83	GheCYP94C83	500	FQGGFRVC	438	ESMRLYPP	361	1	i13-35o
Ghe04G15160	Chr04	84537109	84538679	+	CYP76A126	GheCYP76A126	437	FGAGRRMC	443	ETFRLHPP	368	2	o4-23,i177-196o
Ghe04G15170	Chr04	84580235	84581846	+	CYP76A49	GheCYP76A49	512	FGAGRRMC	443	ETFRLHPP	368	2	o4-23,i69-91o
Ghe04G19510	Chr04	103059401	103061348	-	CYP86B32	GheCYP86B32	547	FNGGPRLC	475	EALRLYPS	399	1	i23-45o
Ghe04G22660	Chr04	107248084	107249725	-	CYP82C51	GheCYP82C51	522	FGSGRRIC	454	ETLRLYPA	377	2	o10-32,i227-249o
Ghe04G22670	Chr04	107251402	107252828	-	CYP82C137	GheCYP82C137	449	FGAGRRIC	354	ETMRLYPA	277	0	o
Ghe04G23910	Chr04	108311634	108314837	+	CYP78A190	GheCYP78A190	534	FGSGRRVC	454	EVLRLHPP	378	2	o4-21,i28-50o
Ghe04G24920	Chr04	109331049	109333091	-	CYP749A235	GheCYP749A235	513	FSMGPRSC	454	ETLRLYSP	378	1	i7-29o
Ghe05G02110	Chr05	2042066	2044908	-	CYP734A56	GheCYP734A56	524	FGLGVRTC	454	ESLRLYPP	379	1	i7-29o
Ghe05G03600	Chr05	3487630	3489549	+	CYP72D17	GheCYP72D17	517	FGWGPRTC	456	EVLRLYPP	381	1	i5-27o
Ghe05G04510	Chr05	4304158	4306585	-	CYP711A55	GheCYP711A55	539	FGIGPRAC	477	EAMRFYIV	402	1	i20-42o
Ghe05G06890	Chr05	6290807	6294823	+	CYP714A29	GheCYP714A29	523	FGLGTRLC	464	EAMRLYPA	389	1	i7-29o
Ghe05G07410	Chr05	6720868	6722603	-	CYP76AG4	GheCYP76AG4	527	FGTGRRSC	458	EVFRLHPG	383	1	o15-37i
Ghe05G09020	Chr05	8338189	8339703	-	CYP94C84	GheCYP94C84	504	FQAGQRVC	440	ESLRLFPP	364	1	i13-35o
Ghe05G09680	Chr05	8959100	8960635	-	CYP86A129	GheCYP86A129	511	FNAGPRTC	449	ETLRLYPS	370	1	i7-24o
Ghe05G10500	Chr05	9607913	9609825	-	CYP714F8	GheCYP714F8	511	FGLGARVC	452	EVLRLYPA	377	1	i7-29o
Ghe05G11810	Chr05	10867445	10869691	+	CYP79D64	GheCYP79D64	550	FSTGMRGC	476	EAFRLHPI	398	1	i21-43o
Ghe05G12420	Chr05	11541110	11543419	-	CYP716A120	GheCYP716A120	438	FGGGPRMC	380	EVMRLAPP	310	0	o
Ghe05G14550	Chr05	13468231	13471651	-	CYP90D39	GheCYP90D39	483	FGGGQRLC	425	ETLRMGNI	354	1	i7-26o
Ghe05G16110	Chr05	14977379	14979004	+	CYP710A140	GheCYP710A140	502	FGAGPHQC	471	EVIRYRPP	398	1	i41-63o
Ghe05G16130	Chr05	15019905	15021413	+	CYP710A69	GheCYP710A69	502	FGAGPHQC	432	EVIRYRPP	359	1	i2-24o
Ghe05G20280	Chr05	19325053	19326647	+	CYP83F69P	GheCYP83F69P	151	FSAGRRIC	327	ETFRLQPT	252	1	o4-21i
Ghe05G21140	Chr05	20183130	20185193	+	CYP721A96	GheCYP721A96	505	FALGPRNC	444	ETLRLYSP	373	1	o4-26i
Ghe05G21150	Chr05	20188957	20191099	+	CYP721A94	GheCYP721A94	505	FGLGSRIC	444	ETLRLYSP	373	1	i7-29o
Ghe05G21400	Chr05	20415090	20415985	-	CYP82D326P	GheCYP82D326P	235	FSSGRRMC	198	ETMRLYPA	121	0	o
Ghe05G21420	Chr05	20448137	20449794	-	CYP82D113	GheCYP82D113	522	FGSGRRSC	454	ETLRMYPP	377	1	i7-24o
Ghe05G21430	Chr05	20455352	20457010	-	CYP82D112	GheCYP82D112	522	FGSGRRSC	454	ETLRLYPP	377	1	i7-24o
Ghe05G21450	Chr05	20509690	20511358	+	CYP82D111	GheCYP82D111	523	FGSGRRSC	455	ETFRMYPP	378	1	i7-24o
Ghe05G21460	Chr05	20601177	20602912	-	CYP82D146	GheCYP82D146	526	FGAGRRLC	459	ESLRLYPA	382	1	i7-29o
Ghe05G21470	Chr05	20603591	20605418	-	CYP82C54	GheCYP82C54	526	FGSGRRSC	457	ETLRLYPA	380	2	o4-23,i226-245o
Ghe05G21510	Chr05	20715225	20726818	+	CYP701A52	GheCYP701A52	501	FGAGKRAC	370	ETLRKHSP	296	0	o
Ghe05G21940	Chr05	21179839	21182715	-	CYP707A139	GheCYP707A139	471	FGSGVHAC	410	ETLQLYSR	48	1	o4-21i
Ghe05G22440	Chr05	21762723	21765187	-	CYP81T4	GheCYP81T4	518	FGVGRRAC	447	ETMRLFPP	375	1	i7-26o
Ghe05G22450	Chr05	21765392	21765727	-	CYP81BQ15P	GheCYP81BQ15P	111	FGLGRRAC	40	EALCSPRP	95	0	o
Ghe05G22500	Chr05	21829415	21831040	+	CYP81B90	GheCYP81B90	516	FGTGRRRC	445	ETFRMCPV	372	1	i7-29o
Ghe05G27980	Chr05	29226082	29228028	-	CYP82D147	GheCYP82D147	526	FGSGRRVC	458	ETTRLYPA	381	1	i9-31o
Ghe05G28170	Chr05	29524959	29526551	-	CYP81B89	GheCYP81B89	501	FGNGRRRC	430	ETFRIKPT	357	0	o
Ghe05G30090	Chr05	33194476	33196230	-	CYP79A179	GheCYP79A179	549	FSTGRRGC	478	EAFRIHPI	399	0	o
Ghe05G31980	Chr05	38745537	38747135	-	CYP736A342	GheCYP736A342	497	FGAGRRLC	432	ETLRLHPI	356	1	i7-26o
Ghe05G31990	Chr05	38867750	38869362	-	CYP736A191	GheCYP736A191	502	FGAGRRLC	432	ETLRLHPI	356	1	i2-24o
Ghe05G34680	Chr05	50014975	50016638	-	CYP82D109	GheCYP82D109	522	FGSGRRSC	454	ETLRMYPP	377	1	i7-24o
Ghe05G38140	Chr05	79488583	79490202	+	CYP71BE74	GheCYP71BE74	499	FGAGRRVC	437	ETLRLHPV	362	1	i7-26o
Ghe05G38160	Chr05	79504399	79508380	+	CYP71BE71	GheCYP71BE71	532	FGAGRRVC	419	ETLRLHPV	344	2	i7-26,o507-529i
Ghe05G38180	Chr05	79539034	79540649	+	CYP71BE70	GheCYP71BE70	507	FGAGRRIC	436	ETLRLHPV	361	1	i7-25o
Ghe05G38200	Chr05	79614467	79615533	+	CYP71BE170P	GheCYP71BE170P	325	FGAGRKCP	254	ETLRLYPV	179	0	o
Ghe05G42930	Chr05	90625924	90627571	-	CYP706Q1	GheCYP706Q1	522	FGSGRRMC	453	ETLRLHPV	378	1	i25-44o
Ghe05G42960	Chr05	90710968	90712615	-	CYP706Q5	GheCYP706Q5	444	FGSGRRMC	453	ETLRLHPV	378	1	i21-43o
Ghe05G42990	Chr05	90760693	90762340	-	CYP706Q7	GheCYP706Q7	390	FGSGRRMC	453	ETLRLHPV	378	0	o
Ghe06G00990	Chr06	762602	768429	+	CYP722A1	GheCYP722A1	498	FGMGARTC	435	ESLRMASV	364	1	i5-27o
Ghe06G01610	Chr06	1272782	1275107	-	CYP82D150	GheCYP82D150	553	FGSGRRMC	454	ETLRLYPA	377	1	i7-29o
Ghe06G01620	Chr06	1297956	1299955	-	CYP82D148	GheCYP82D148	530	FGSGRRMC	459	ETLRLYPA	382	2	o10-32,i117-139o
Ghe06G01630	Chr06	1306715	1314831	-	CYP82D149	GheCYP82D149	1031	FGSGRRMC	970	ETLRLYPP	378	3	i7-29,o523-545,i628-650o
Ghe06G01670	Chr06	1357217	1359111	-	CYP82D327	GheCYP82D327	169	FSSGRRMC	454	ETLRLYPA	377	1	i7-29o
Ghe06G01680	Chr06	1362534	1365295	-	CYP82D333P	GheCYP82D333P	446	FSSDRRMC	305	ETLRIYPA	228	0	o
Ghe06G01690	Chr06	1372126	1373496	-	CYP82D220	GheCYP82D220	408	FGSGRRMC	337	ETIRLYPP	260	0	o
Ghe06G01710	Chr06	1386266	1388253	-	CYP82D151	GheCYP82D151	504	FSSGRRMC	454	ETLRLYPA	377	1	i7-29o
Ghe06G01720	Chr06	1391197	1393200	-	CYP82D330	GheCYP82D330	509	FGSGRRMC	454	ETLRLYPP	377	1	i7-29o
Ghe06G01740	Chr06	1419113	1421328	-	CYP82D332P	GheCYP82D332P	509	FGSGRRMC	400	ETLRLYPA	323	1	i7-29o
Ghe06G01750	Chr06	1426671	1428405	-	CYP82D329	GheCYP82D329	532	FGSGRRMC	454	ETLRLYPP	377	2	o5-27,i228-247o
Ghe06G01760	Chr06	1430394	1432049	-	CYP82D110	GheCYP82D110	520	FGSGRRSC	452	ETLRMYPP	375	1	i7-24o
Ghe06G01810	Chr06	1483073	1486148	+	CYP701A18	GheCYP701A18	502	FGAGKRAC	441	ETLRKHSP	367	1	i5-22o
Ghe06G02730	Chr06	2427851	2429433	-	CYP81B177	GheCYP81B177	500	FGAGRRGC	429	ETLRMYPP	356	0	o
Ghe06G07060	Chr06	10932659	10935226	-	CYP734A57	GheCYP734A57	515	FGLGVRTC	453	ESLRLYPP	378	1	i7-29o
Ghe06G09520	Chr06	20289757	20291975	-	CYP92A133	GheCYP92A133	517	FGSGRRMC	445	ETMRKHPV	370	0	o
Ghe06G14520	Chr06	54976887	54978600	-	CYP78A195	GheCYP78A195	544	FGAGRRVC	473	ETLRLHPP	392	1	i29-51o
Ghe06G18970	Chr06	106926593	106927450	-	CYP710A70	GheCYP710A70	269	FGAGPHQC	199	EVSRIWSP	112	0	o
Ghe06G20560	Chr06	115448819	115450336	+	CYP77B26	GheCYP77B26	505	FGAGRRIC	444	ETLRRHPP	365	0	o
Ghe06G21830	Chr06	118446608	118450139	-	CYP88A77	GheCYP88A77	494	FGAGSRLC	431	ETLRLITF	361	1	i7-26o
Ghe06G22630	Chr06	120491436	120495759	-	CYP90A46	GheCYP90A46	472	FGGGPRLC	414	ETLQLISA	43	1	i2-24o
Ghe06G24490	Chr06	124372604	124375725	-	CYP727B4	GheCYP727B4	559	FGSGARAC	495	ESARVMPA	389	1	i31-53o
Ghe06G24800	Chr06	124912441	124916063	-	CYP728G3	GheCYP728G3	494	FGAGPRVC	435	ELMRVNPP	363	1	i20-42o
Ghe06G27540	Chr06	128400797	128402317	+	CYP77B27	GheCYP77B27	506	FGAGRRIC	445	ETFRRHPP	366	0	o
Ghe07G00260	Chr07	228407	231192	-	CYP734A58	GheCYP734A58	518	FGLGVRTC	452	ESLRLYPP	377	1	i7-29o
Ghe07G04840	Chr07	5259761	5261979	+	CYP704A127	GheCYP704A127	524	FQAGPRIC	463	ETLRLYPA	386	3	i2-19,o23-45,i313-335o
Ghe07G06120	Chr07	6692636	6695067	+	CYP87B28	GheCYP87B28	443	FGGGNRTC	424	ESLRLANV	352	1	i7-24o
Ghe07G06650	Chr07	7421499	7424795	-	CYP71AH6	GheCYP71AH6	486	FGVGRRGC	436	ETLRLHPP	361	2	o5-22,i64-86o
Ghe07G06700	Chr07	7517513	7518181	+	CYP71AN47-fragment	GheCYP71AN47-fragment	171	FGCGRRDC	123	ETLRLHPP	48	2	o170-192,i199-221o
Ghe07G09230	Chr07	12100680	12102598	+	CYP81AT5	GheCYP81AT5	501	FGLGRRAC	430	EAQRLYPA	359	1	i7-24o
Ghe07G09280	Chr07	12202699	12203280	+	CYP81AT6P	GheCYP81AT6P	179	FGLGRRAC	122	EAQRLHPA	51	0	o
Ghe07G09420	Chr07	12567319	12570285	-	CYP85A1	GheCYP85A1	470	FGGGTRQC	413	ETSRLATI	342	1	i3-25o
Ghe07G11030	Chr07	16178402	16181736	+	CYP82L15	GheCYP82L15	515	FSSGRRSC	445	ETLRLYPP	368	2	o4-21,i217-234o
Ghe07G11070	Chr07	16290693	16292772	+	CYP82L32	GheCYP82L32	521	FSSGRRSC	445	ETLRLYPP	368	0	o
Ghe07G12020	Chr07	18126275	18130384	-	CYP707A143	GheCYP707A143	491	FGNGVHSC	431	ETLKFYTQ	70	1	o23-45i
Ghe07G12400	Chr07	18917008	18918552	+	CYP86A130	GheCYP86A130	514	FNAGPRTC	452	ETLRLYPS	373	1	i5-27o
Ghe07G14510	Chr07	24797980	24805199	+	CYP75A20b	GheCYP75A20b	498	FGAGRRIC	440	ETFRKHPS	362	1	i7-26o
Ghe07G14530	Chr07	24826838	24828450	+	CYP75A20a	GheCYP75A20a	510	FGAGRRIC	440	ETFRKHPS	362	1	i7-26o
Ghe07G19800	Chr07	47367894	47369804	-	CYP82J10	GheCYP82J10	530	FGSGRRSC	459	ETLRLYPP	382	0	o
Ghe07G23210	Chr07	84351041	84353654	-	CYP85A41	GheCYP85A41	465	FGGGTRQC	408	ETSRLATI	337	1	i2-24o
Ghe07G23300	Chr07	84802814	84804012	+	CYP714E80	GheCYP714E80	341	FGVGPRVC	260	ESLRLYLP	185	0	o
Ghe07G23910	Chr07	86952734	86959854	-	CYP97B47	GheCYP97B47	579	FGGGPRKC	515	ESLRLYPQ	412	0	o
Ghe07G25350	Chr07	92785172	92787016	+	CYP79D118	GheCYP79D118	542	FSRGRRGC	471	EAFRLHPI	391	1	i5-27o
Ghe07G25370	Chr07	92870283	92872110	+	CYP79D120	GheCYP79D120	541	FGRGRRGC	465	EAFRLHPI	385	1	i9-31o
Ghe07G25430	Chr07	93392107	93393941	+	CYP79D66	GheCYP79D66	545	FGRGRRGC	471	EAFRLHPV	391	1	i7-29o
Ghe07G27070	Chr07	95957869	95959413	-	CYP94A131	GheCYP94A131	506	FQAGPRIC	447	ESMRLYPP	366	1	i7-29o
Ghe07G27240	Chr07	96360873	96362482	+	CYP71BE75	GheCYP71BE75	509	FGAGRRMC	439	ETMRLHPP	364	1	o4-26i
Ghe07G27750	Chr07	97068218	97069771	+	CYP94A73	GheCYP94A73	516	FQAGPRVC	452	ECMRLYPP	371	1	i7-29o
Ghe08G00890	Chr08	607450	608556	+	CYP94C85	GheCYP94C85	368	FQAGLRVC	306	ESLRLFPP	230	0	o
Ghe08G01420	Chr08	1032263	1033828	-	CYP94F9	GheCYP94F9	521	FHCGPRTC	450	ESLRLFPP	372	2	o10-32,i311-333o
Ghe08G01990	Chr08	1604670	1609342	+	CYP716A119	GheCYP716A119	480	FGGGPRMC	420	EVLRLAPP	350	1	i5-24o
Ghe08G14560	Chr08	83651580	83653358	+	CYP78A196	GheCYP78A196	532	FGSGRRTC	469	EVLRMHPP	387	1	i26-48o
Ghe08G17690	Chr08	103932169	103933752	+	CYP86A132	GheCYP86A132	527	FNAGPRIC	450	ETLRLYPS	372	1	i7-24o
Ghe08G18130	Chr08	105282472	105285524	-	CYP704A128	GheCYP704A128	512	FHAGPRIC	449	ETLRLYPA	373	1	i5-27o
Ghe08G18770	Chr08	108070803	108072575	+	CYP78A197	GheCYP78A197	534	FGSGRRTC	468	EVLRLHPP	388	1	i25-47o
Ghe08G20260	Chr08	113430506	113432652	-	CYP707A141	GheCYP707A141	466	FGNGTHSC	407	ETFQLYSQ	48	1	o4-26i
Ghe08G21290	Chr08	116198607	116203221	-	CYP88A78	GheCYP88A78	490	FGSGSKTC	402	ESLRRNYF	332	1	i5-24o
Ghe08G21310	Chr08	116309988	116313741	-	CYP88A79	GheCYP88A79	487	FGAGSRIC	428	ETLRRASV	358	1	i2-24o
Ghe08G22970	Chr08	120526927	120528178	+	CYP706D9	GheCYP706D9	407	FGSGGRMC	315	ETLRLHPS	238	0	o
Ghe08G23250	Chr08	121061694	121063272	+	CYP76F168	GheCYP76F168	414	FGGGRRIC	430	ETLRLHPP	355	0	o
Ghe08G23270a	Chr08	121095360	121109898	+	CYP76F89	GheCYP76F89	483	FGAGRRIC	434	ETLRLHPP	359	1	i2-21o
Ghe08G23270b	Chr08	121095360	121109898	+	CYP76F90	GheCYP76F90	498					1	i7-24o
Ghe08G23280	Chr08	121142495	121144073	+	CYP76F91	GheCYP76F91	500	FGSGRRIC	436	ETMRLHPP	361	1	i7-24o
Ghe08G23310	Chr08	121178155	121179721	+	CYP76F159	GheCYP76F159	496	FGGGRRIC	432	ETLRLHPP	357	0	o
Ghe08G24200	Chr08	122826683	122828287	-	CYP86A131	GheCYP86A131	534	FNAGPRIC	450	ETLRLYPS	372	0	o
Ghe08G24800	Chr08	123646880	123648400	+	CYP94A74	GheCYP94A74	506	FQAGPRIC	441	ESMRLYPP	360	1	i2-24o
Ghe08G28620	Chr08	128623978	128625522	+	CYP89A153	GheCYP89A153	514	FGVGRRIC	450	EGLRRHPP	368	0	o
Ghe08G30180	Chr08	130255729	130258376	-	CYP72A506	GheCYP72A506	521	FGGGPRIC	462	EVLRLYPP	386	1	i12-34o
Ghe08G30870	Chr08	130819179	130822262	-	CYP734A59	GheCYP734A59	517	FGLGVRTC	458	ESLRLYPP	383	1	i12-34o
Ghe09G02010	Chr09	4154626	4160569	-	CYP736A353P	GheCYP736A353P	167	MGLGRRLK	19	EGLRLHPV	153	0	o
Ghe09G02020	Chr09	4169524	4172828	-	CYP736A192	GheCYP736A192	509	FGAGRRRC	442	ESLRLHPV	366	1	i7-26o
Ghe09G02030	Chr09	4183506	4186237	-	CYP736A350P-C-term	GheCYP736A350P-C-term	325	FGSGRRGC	258	ESLRLHPV	182	0	o
Ghe09G02040	Chr09	4186313	4186789	-	CYP736A350P-N-term	GheCYP736A350P-N-term	158	YGSYWRTV	126	YTLQLLSS	137	1	o5-24i
Ghe09G03740	Chr09	8816862	8818061	-	CYP96A239P	GheCYP96A239P	342	FGAGPRIC	250	EALRLYPP	173	0	o
Ghe09G03760	Chr09	8831593	8833104	-	CYP96A131	GheCYP96A131	502	FGAGPRIC	442	EALRLYPP	365	1	i5-24o
Ghe09G03910	Chr09	9391681	9392970	+	CYP96A241P	GheCYP96A241P	396	FGAGSRIC	302	EVLRLYPP	225	0	o
Ghe09G05960	Chr09	16410584	16413711	-	CYP94B71	GheCYP94B71	351	VQAGDRVT	352	ESMRLYPP	325	0	o
Ghe09G06920	Chr09	28773020	28776937	-	CYP715A41	GheCYP715A41	448	FGFGGRMC	446	EVLRLYSS	370	1	i13-35o
Ghe09G07690	Chr09	41015782	41018940	+	CYP736A352P	GheCYP736A352P	458	FGSGRRGC	353	ECLRLHPV	304	0	o
Ghe09G07740	Chr09	41259046	41260632	+	CYP736A193	GheCYP736A193	493	FGSGRRVC	428	ETLRLHPV	352	1	i7-25o
Ghe09G07780	Chr09	41980114	41981355	+	CYP736A340P	GheCYP736A340P	160	FGSGRRVC	256	ETLRLYPV	180	0	o
Ghe09G07790	Chr09	42334397	42335995	+	CYP736A196	GheCYP736A196	497	FGAGRRLC	432	EIFRLHPV	356	1	i5-27o
Ghe09G13730	Chr09	64379709	64381178	+	CYP94C86	GheCYP94C86	489	FQAGKRVC	427	ESLRLFPP	351	1	i7-26o
Ghe09G16910	Chr09	69899929	69903689	+	CYP712J4	GheCYP712J4	488	FGSGRRVC	441	ETLRLHSP	367	1	i7-28o
Ghe09G16930	Chr09	69977597	69979256	+	CYP712C5	GheCYP712C5	512	FGSGRRAC	416	ETLRLHPP	342	1	i13-30o
Ghe09G16950	Chr09	69989564	69991282	+	CYP93A89	GheCYP93A89	517	FGSGRRSC	447	ETLRLHPG	365	1	i7-26o
Ghe09G18430	Chr09	72419167	72420534	-	CYP94C87	GheCYP94C87	455	FQAGFRVC	389	ESMRLYPP	312	0	o
Ghe09G23020	Chr09	77623855	77625897	+	CYP715A39	GheCYP715A39	521	FGFGGRMC	462	EVLRLYSP	386	1	i13-35o
Ghe09G24570	Chr09	78961752	78970666	-	CYP76F93	GheCYP76F93	470	FGAGRRIC	436	ETFRMHPA	361	0	o
Ghe09G24580	Chr09	78972724	78974773	-	CYP76F166	GheCYP76F166	482	FGAGRRIC	436	ETFRMHPV	361	0	o
Ghe09G24600	Chr09	79035488	79037338	-	CYP76F171	GheCYP76F171	258	FGAGRRIC	363	ETFRMHPA	288	0	o
Ghe09G25030	Chr09	79387417	79388468	-	CYP88P2P	GheCYP88P2P	190	FSTGSSTC	111	ETLRIRTN	77	0	o
Ghe09G25050	Chr09	79443464	79445831	-	CYP88P4	GheCYP88P4	495	FGAGSSTC	441	ETLRRRTN	371	1	i2-24o
Ghe09G25240	Chr09	79554082	79555778	-	CYP93B85	GheCYP93B85	525	FGTGRRGC	458	ESFRLHPP	372	1	i5-24o
Ghe09G26030	Chr09	80251155	80252727	-	CYP736A194	GheCYP736A194	499	FGAGRRGC	432	ESFRLHPV	357	1	i7-24o
Ghe09G26040	Chr09	80255669	80257241	-	CYP736A195	GheCYP736A195	499	FGAGRRGC	432	ESFRLHPV	357	1	i7-24o
Ghe10G00540	Chr10	571760	574621	+	CYP716C26	GheCYP716C26	486	FGGGLRMC	427	EVMRLTPP	356	1	i7-29o
Ghe10G01440	Chr10	1149546	1152637	-	CYP728D32	GheCYP728D32	473	FGGGATIC	381	ETLRMNPP	343	0	o
Ghe10G01490	Chr10	1180630	1182165	-	CYP77B25	GheCYP77B25	509	FGAGRRIC	446	ETFRRHPP	367	1	i5-22o
Ghe10G05660	Chr10	5328603	5330723	-	CYP92A131	GheCYP92A131	510	FGAGRRMC	439	ETMRLHPV	364	1	i5-24o
Ghe10G05670	Chr10	5338107	5340755	-	CYP92A132	GheCYP92A132	510	FGSGRRKC	439	EALRLHPV	364	1	i7-26o
Ghe10G11200	Chr10	31409080	31411016	-	CYP749A222	GheCYP749A222	520	FGMGPRAC	457	ETLRLYAP	381	1	i12-34o
Ghe10G11230	Chr10	31441127	31443039	-	CYP749A223	GheCYP749A223	519	FGMGPRAC	456	ETLRLYTP	380	1	i7-29o
Ghe10G11310	Chr10	32575797	32577423	-	CYP71AN53	GheCYP71AN53	502	FGIGRRTC	400	ETLRLHPP	324	1	i13-35o
Ghe10G16860	Chr10	59321749	59323275	-	CYP84A77	GheCYP84A77	508	FGSGRRSC	438	ETLRLHPP	363	0	o
Ghe10G23190	Chr10	109550554	109552685	+	CYP73A26	GheCYP73A26	436	FGSRTRNV	98	ETLRLRMA	363	1	i5-24o
Ghe10G23460	Chr10	110440172	110441335	-	CYP79A193P	GheCYP79A193P	320	FGKGRKDG	72	EAFQLHPI	201	0	o
Ghe10G23470	Chr10	110462951	110464824	-	CYP79A116	GheCYP79A116	555	FGTGRRGC	485	EAFRLHPI	407	1	i30-52o
Ghe10G25650	Chr10	116540231	116541531	-	CYP83F44	GheCYP83F44	389	FGAGRRVC	338	ETFRLQTT	263	0	o
Ghe10G25660	Chr10	116554113	116554355	-	CYP83F-C-term-fragment	GheCYP83F-C-term-fragment	76	FGAGRRVC	46	ENPEEFYP	19	0	o
Ghe10G25670	Chr10	116559623	116564554	-	CYP83F46	GheCYP83F46	1001	FGAGRRVC	924	ETFRLQAT	362	3	i5-22,o298-320,i494-516o
Ghe10G25690	Chr10	116604993	116606612	-	CYP83F47	GheCYP83F47	503	FGAGRRVC	437	ETFRLHPT	362	2	o5-22,i298-320o
Ghe10G25700	Chr10	116626130	116627717	+	CYP83F64	GheCYP83F64	485	FGAGRRVC	435	ETFRLQPA	360	1	i2-19o
Ghe10G25710	Chr10	116634751	116636336	+	CYP83F63	GheCYP83F63	501	FGAGRRVC	435	ETFRLQPA	360	1	i2-19o
Ghe10G25720	Chr10	116656110	116657843	+	CYP83F48	GheCYP83F48	378	FGAGRRAK	341	ETFRLQPV	266	1	i5-22o
Ghe10G25980	Chr10	117112905	117114413	+	CYP94D66	GheCYP94D66	502	FHGGPRMC	442	ESLRLYPP	365	1	i5-27o
Ghe10G26330	Chr10	117694647	117696164	-	CYP77A39	GheCYP77A39	505	FGVGRRIC	440	ELLRRHPP	361	1	i5-22o
Ghe10G26460	Chr10	117998608	118000472	+	CYP714E34	GheCYP714E34	510	FGTGPRSC	451	ETLRLYPL	376	1	i7-29o
Ghe10G26540	Chr10	118280283	118281904	+	CYP71AN75	GheCYP71AN75	495	FGFGRRSC	439	ETLRLHPT	364	1	i9-28o
Ghe10G26550	Chr10	118343548	118345251	+	CYP71AN50b	GheCYP71AN50b	507	FGFGRRRC	470	ETLRLHPA	395	1	i39-58o
Ghe10G26560	Chr10	118408664	118410368	+	CYP71AN50a	GheCYP71AN50a	507	FGFGRRRC	470	ETLRLHPA	395	1	i39-58o
Ghe10G26570	Chr10	118417932	118419820	+	CYP71AN51	GheCYP71AN51	474	FGFGRRRC	440	ETLRLHPA	365	1	i9-28o
Ghe10G26590	Chr10	118492054	118493764	-	CYP71AN52	GheCYP71AN52	491	FGFGRKRC	440	ETLRLHPV	365	1	i5-27o
Ghe10G26620	Chr10	118510767	118512373	+	CYP71AN76P	GheCYP71AN76P	284	FGFGRRRC	292	ETLRLHPA	217	1	i13-31o
Ghe10G29220	Chr10	123155236	123158161	+	CYP706P1	GheCYP706P1	529	FGSGRRIC	460	ETFRIHPP	383	1	i19-41o
Ghe10G32110	Chr10	127410427	127415087	+	CYP90A47	GheCYP90A47	470	FGGGPRLC	411	ETLQLIAA	44	1	i2-21o
Ghe10G32280	Chr10	127558292	127560116	+	CYP71BG3	GheCYP71BG3	502	FGGGRRGC	435	EAMRLHPT	360	1	i9-26o
Ghe11G00880	Chr11	769765	771442	-	CYP706Q12	GheCYP706Q12	324	FGSGRRMC	452	ETLRLHPV	377	1	i20-42o
Ghe11G00890	Chr11	778420	778752	-	CYP706Q13P	GheCYP706Q13P	128	FGSARRMC	92	ETDISYRD	77	1	i21-43o
Ghe11G00900	Chr11	779658	781284	-	CYP706Q4	GheCYP706Q4	515	FGSGRRMC	452	ETLRLHPV	377	1	i21-43o
Ghe11G00910	Chr11	785854	787526	-	CYP706Q9	GheCYP706Q9	415	FGSGRRIC	463	ETLRLHPV	388	1	i23-45o
Ghe11G04420	Chr11	3562049	3563596	-	CYP94B70	GheCYP94B70	515	FQAGPRVC	453	ESMRLYPP	372	1	i5-27o
Ghe11G05180	Chr11	4169071	4171115	-	CYP84A79	GheCYP84A79	517	FGSGRRSC	447	ETLRLHPP	372	1	i13-30o
Ghe11G09490	Chr11	8025083	8027007	+	CYP704A129	GheCYP704A129	523	FHAGPRIC	455	ETLRLYPV	379	1	i7-29o
Ghe11G09500	Chr11	8068860	8070938	+	CYP704A264	GheCYP704A264	506	FQAGPRVC	443	ETIRLYPA	366	1	i7-26o
Ghe11G09520	Chr11	8115253	8117322	+	CYP704A263	GheCYP704A263	506	FQAGPRVC	443	ETLRLYPA	366	1	i7-26o
Ghe11G10280	Chr11	8722869	8724455	-	CYP86A133	GheCYP86A133	528	FNAGPRIC	450	ETLRLFPS	372	1	i7-24o
Ghe11G11430	Chr11	10237790	10239624	+	CYP78A198	GheCYP78A198	540	FGSGRRTC	471	EVLRLHPP	391	1	i25-47o
Ghe11G15500	Chr11	16464789	16467291	+	CYP92A28	GheCYP92A28	511	FGAGRRMC	439	ETMRLHPV	364	1	i5-24o
Ghe11G16140	Chr11	17560901	17561494	-	CYP82J26P	GheCYP82J26P	147	FGSGRRSC	126	ETFRLYPP	49	0	o
Ghe11G17620	Chr11	20454945	20465282	+	CYP74B25	GheCYP74B25	424	YTGNTRVC	61	ETLRMNPP	296	0	o
Ghe11G18600	Chr11	22367371	22370457	+	CYP735A40	GheCYP735A40	522	FAAGPRNC	458	ESLRLYPP	386	1	i12-34o
Ghe11G20600	Chr11	26056603	26058357	-	CYP84A78	GheCYP84A78	507	FGSGRRSC	437	ETLRLHPP	362	1	i7-24o
Ghe11G21020	Chr11	27243125	27246468	-	CYP90B35	GheCYP90B35	485	FGGGPRLC	390	ETLRLGNV	308	1	i7-24o
Ghe11G21570	Chr11	29281616	29282578	-	CYP82C141	GheCYP82C141	266	FGSGRRSC	196	ETLRLYPP	118	0	o
Ghe11G21590	Chr11	29310733	29311859	-	CYP82C143P	GheCYP82C143P	326	FGSGRRSC	242	ETLRLYPP	164	1	i29-48o
Ghe11G21610	Chr11	29373405	29376525	-	CYP82C136	GheCYP82C136	523	FGLGRRSC	453	ETLRLYPS	375	2	o4-22,i224-246o
Ghe11G22960	Chr11	36948961	36950545	-	CYP81AT2	GheCYP81AT2	500	FGMGRRAC	428	ETLRLYPA	356	1	i7-24o
Ghe11G25560	Chr11	55255803	55257326	-	CYP96A133	GheCYP96A133	507	FNAGPRTC	446	EALRLYPP	369	0	o
Ghe11G25830	Chr11	59650652	59652151	-	CYP96A130	GheCYP96A130	499	FNAGPRTC	438	EALRLYPP	361	0	o
Ghe11G26710	Chr11	70736697	70738336	-	CYP71BC7	GheCYP71BC7	454	FGAGRRSC	425	ETFRLHPP	371	2	o15-33,i306-328o
Ghe11G27800	Chr11	86824912	86826399	+	CYP73A286	GheCYP73A286	429	FGVGRRSC	457	ETLRLHTP	376	0	o
Ghe11G41310	Chr11	127865913	127867439	+	CYP89A154	GheCYP89A154	508	FGVGRRIC	445	EGLRRHPP	368	0	o
Ghe11G41320	Chr11	127872836	127874728	+	CYP89A155	GheCYP89A155	492	FGVGRRIC	446	EGLRRHPP	369	1	i5-27o
Ghe11G41330	Chr11	127878848	127880386	+	CYP89A156	GheCYP89A156	512	FGVGRRIC	449	EGLRRHPP	368	1	i5-24o
Ghe11G44380	Chr11	131878844	131879353	-	CYP76G42P	GheCYP76G42P	143	LGCARRCH	131	ETLRLHPP	62	0	o
Ghe11G44420	Chr11	131904344	131906312	-	CYP76G21	GheCYP76G21	513	FGSGRRMC	444	ETLRLHPP	368	1	i5-22o
Ghe11G44500	Chr11	131952690	131956939	-	CYP97C38	GheCYP97C38	548	FSGGPRKC	479	ESLRLYPH	402	0	o
Ghe12G02700	Chr12	3512014	3513549	-	CYP96K6	GheCYP96K6	511	FLAGPRIC	450	ETLRLHPP	373	1	i5-27o
Ghe12G04830	Chr12	7977886	7979525	-	CYP82C59	GheCYP82C59	520	FGSGRRIC	452	ETLRIKPP	375	2	o10-29,i223-245o
Ghe12G06130	Chr12	12102432	12104418	-	CYP735A41	GheCYP735A41	519	FAAGPRNC	458	ESLRLYPP	386	1	i5-27o
Ghe12G06470	Chr12	13265034	13266616	-	CYP81AT1	GheCYP81AT1	500	FGLGRRAC	431	ETLRLYPA	357	1	i7-24o
Ghe12G07270	Chr12	14944929	14947253	+	CYP722C9	GheCYP722C9	491	FGAGPRTC	428	ETLRMANV	359	1	i12-34o
Ghe12G09130	Chr12	31287267	31288826	+	CYP77A40	GheCYP77A40	519	FGAGRRIC	453	EVLRKHPP	375	1	i13-35o
Ghe12G11630	Chr12	62326383	62328719	-	CYP81BA2	GheCYP81BA2	504	FGLGRRAC	434	ETLRLYPA	360	0	o
Ghe12G13500	Chr12	77645861	77647751	-	CYP714E37	GheCYP714E37	522	FGIGARIC	463	ETLRLYPP	388	1	i7-29o
Ghe12G15300	Chr12	81174652	81176644	-	CYP703A26	GheCYP703A26	524	FSAGKRKC	453	ETFRMHPA	374	2	o4-21,i217-236o
Ghe12G15470	Chr12	81574639	81576325	+	CYP78A199	GheCYP78A199	533	FGSGRRTC	468	EVLRLHPP	388	1	i26-48o
Ghe12G18580	Chr12	87775409	87777855	+	CYP72A507	GheCYP72A507	514	FGWGPRIC	451	EVMRLYPS	377	1	i7-25o
Ghe12G18700	Chr12	88339428	88341798	+	CYP51G1	GheCYP51G1	486	FGGGRHGC	422	EALRLHPP	342	1	i7-29o
Ghe12G19400	Chr12	90519853	90531371	+	CYP71AS19	GheCYP71AS19	488	FGGGRRGC	441	ETLRLHPP	366	2	o5-24,i301-323o
Ghe12G21100	Chr12	94643172	94644830	-	CYP78A200	GheCYP78A200	519	FGSGRRVC	456	ETLRVHPP	380	2	o20-42,i49-71o
Ghe12G21520	Chr12	95238765	95241030	+	CYP704B42	GheCYP704B42	534	FQAGPRIC	473	ETLRLYPA	397	1	i7-29o
Ghe12G23640	Chr12	99515769	99519731	+	CYP75B105	GheCYP75B105	510	FGAGRRIC	440	ETFRLHPS	361	1	i2-21o
Ghe12G24030	Chr12	100139665	100141017	-	CYP71AN70P	GheCYP71AN70P	375	FGFGRRGR	302	ETLRLHPA	227	0	o
Ghe12G24040	Chr12	100144827	100146527	-	CYP71AN55	GheCYP71AN55	534	FGFGRRGC	461	ETLRLHPA	386	2	o31-53,i239-261o
Ghe12G24050	Chr12	100181693	100183458	+	CYP71BF13	GheCYP71BF13	542	FSSGRRTC	476	ETLRLHPP	401	1	i37-59o
Ghe12G24530	Chr12	100753038	100754540	-	CYP71BF17P	GheCYP71BF17P	435	FVAGTHTT	320	ETLRLYPP	379	1	i17-39o
Ghe12G26380	Chr12	103183545	103188368	-	CYP76Y17	GheCYP76Y17	499	FGAGRRIC	426	ETLRLHPA	877	0	o
Ghe12G28020	Chr12	105116792	105118779	+	CYP706C46	GheCYP706C46	502	FGSGRRIC	432	ESLRLHPV	357	1	i2-21o
Ghe12G28550	Chr12	105636067	105638382	+	CYP87A55	GheCYP87A55	470	FGGGMRFC	413	ETVRLANI	341	0	o
Ghe12G28950	Chr12	105957648	105959231	-	CYP86A134	GheCYP86A134	527	FNAGPRIC	450	ETLRLYPS	372	1	i5-27o
Ghe12G30050	Chr12	106935530	106937264	-	CYP78A201	GheCYP78A201	497	FGSGRRSC	434	EVLRLHPP	353	0	o
Ghe12G31890	Chr12	108462478	108467715	-	CYP715A40	GheCYP715A40	465	FGFGGRMC	406	EVLRLYSP	330	0	o
Ghe12G32200	Chr12	108707090	108710452	+	CYP87A96P	GheCYP87A96P	220	FGSGVRLC	388	ETIRLGNI	316	0	o
Ghe12G32700	Chr12	109099494	109100069	+	CYP706P3	GheCYP706P3	191	FGSRRRIC	122	ETLRIHPL	45	0	o
Ghe12G32750	Chr12	109143250	109146400	+	CYP706P4	GheCYP706P4	531	FGSGRRIC	462	ETLRIHPP	385	2	o23-45,i58-75o
Ghe13G00120	Chr13	94464	98181	+	CYP98A95	GheCYP98A95	510	FGAGRRVC	432	EALRLHPP	357	1	i5-24o
Ghe13G01450	Chr13	1370817	1373458	-	CYP88A80	GheCYP88A80	407	FGAGSRLC	341	ETLRLVTF	271	0	o
Ghe13G02000	Chr13	1857526	1862022	+	CYP714E79	GheCYP714E79	513	FGAGPHTC	454	ESLRLYSP	379	1	i7-29o
Ghe13G02670	Chr13	2596467	2601268	-	CYP736A345P	GheCYP736A345P	392	FGSGRRGC	353	ESLRLHPV	277	1	i2-24o
Ghe13G02690	Chr13	2620146	2623935	-	CYP736A197	GheCYP736A197	502	FGSGRRGC	440	ESLRLHPV	364	1	i2-24o
Ghe13G02720	Chr13	2662164	2664825	-	CYP736A198	GheCYP736A198	507	FGSGRRGC	440	ESLRLHPV	364	1	i2-24o
Ghe13G03390	Chr13	3396622	3399109	-	CYP84A80	GheCYP84A80	540	FGSGRRSC	452	ETLRLHPP	377	1	i13-32o
Ghe13G04320	Chr13	4556665	4558575	+	CYP749A205	GheCYP749A205	529	FGLGPRSC	466	ETLRLYPP	390	1	i20-42o
Ghe13G04340	Chr13	4574476	4576382	+	CYP749A200	GheCYP749A200	529	FGLGPRSC	466	ETLRLYPP	390	1	i20-42o
Ghe13G04360	Chr13	4670641	4672162	+	CYP749A236	GheCYP749A236	426	FGLGPRSC	327	ETLRLYPP	251	0	o
Ghe13G04380	Chr13	4681336	4683232	+	CYP749A202	GheCYP749A202	529	FGLGPRSC	462	ETLRLYPP	390	1	i20-42o
Ghe13G04390	Chr13	4709893	4711800	+	CYP749A237	GheCYP749A237	529	FGLGPRSC	466	ETLRLYPP	390	1	i20-42o
Ghe13G04400	Chr13	4765893	4767764	+	CYP749A203	GheCYP749A203	519	FGLGPRSC	456	ETLRLYPP	380	1	i7-28o
Ghe13G04610	Chr13	5059280	5061995	-	CYP707A268	GheCYP707A268	434	FGNGVHAC	371	ETLQLYSQ	8	0	o
Ghe13G07400	Chr13	10920016	10922819	+	CYP86B33	GheCYP86B33	539	FNGGPRLC	470	EALRLYPS	394	2	o28-50,i57-74o
Ghe13G07560	Chr13	11342565	11345175	+	CYP749A76	GheCYP749A76	513	FGLGPRTC	453	ETLRLYPP	377	1	i7-29o
Ghe13G07590	Chr13	11561108	11563136	+	CYP749A234	GheCYP749A234	480	FRLEPRSC	416	ETLRLYPP	340	1	i2-24o
Ghe13G09600	Chr13	24319722	24321218	+	CYP96Z1	GheCYP96Z1	498	FSAGPRIC	437	ETLRLFPP	360	1	i5-27o
Ghe13G10380	Chr13	28809407	28811048	+	CYP78A202	GheCYP78A202	518	FGSGRRVC	455	ETLRVHPP	379	2	o20-42,i49-71o
Ghe13G10420	Chr13	29205108	29207389	+	CYP85A42	GheCYP85A42	466	FGGGSRLC	407	ETSRLATV	336	1	i2-24o
Ghe13G12630	Chr13	53874000	53875553	+	CYP89A157	GheCYP89A157	517	FGVGRRIC	454	EGLRRHPP	372	1	i5-27o
Ghe13G13050	Chr13	59205520	59207951	-	CYP749A75	GheCYP749A75	519	FGFGPRTC	453	EALRLYPP	377	1	i7-29o
Ghe13G16100	Chr13	86815754	86817383	-	CYP716E46	GheCYP716E46	483	FGGGPRMC	425	EVMRLAPP	355	1	i7-28o
Ghe13G16340	Chr13	89246030	89247672	+	CYP716E47	GheCYP716E47	487	FGGGPRMC	427	EVMRLAPP	357	1	i12-34o
Ghe13G16560	Chr13	90862251	90864558	+	CYP93B35	GheCYP93B35	532	FGTGRRGC	449	ESFRLHPP	365	1	i7-29o
Ghe13G17000	Chr13	93602096	93603617	+	CYP71BE76	GheCYP71BE76	481	SGAGKRIC	418	ETIRLHPP	343	0	o
Ghe13G18150	Chr13	97660567	97662187	+	CYP71BE77	GheCYP71BE77	512	FGAGRRIC	435	ETLRLHPI	360	1	i5-22o
Ghe13G18300	Chr13	98223008	98224638	+	CYP71BE79	GheCYP71BE79	508	FGAGRRMC	437	ETFRIRPS	362	0	o
Ghe13G21130	Chr13	104238368	104243844	-	CYP97A50	GheCYP97A50	616	FGGGPRKC	516	ESLRLYPQ	440	0	o
Ghe13G21190	Chr13	104375429	104377042	+	CYP71BE178	GheCYP71BE178	503	FGAGRRMC	437	ETLRLHPP	362	0	o
Ghe13G21200	Chr13	104410656	104413451	+	CYP71BE80	GheCYP71BE80	487	FGAGRRIC	439	ETMRLHPP	364	1	o4-26i
Ghe13G26930	Chr13	113618949	113620557	+	CYP71AN73	GheCYP71AN73	506	FGFGRRAC	441	ETLRLHPA	365	2	o6-28,i214-233o
Ghe13G26950	Chr13	113681708	113683321	+	CYP71AN72	GheCYP71AN72	506	FGFGRRAC	444	ETLRLHPA	369	2	o10-32,i218-237o
GheUnG00150	Contig1004	129231	131164	-	CYP714E35	GheCYP714E35	513	FGFGPHTC	454	ETLRLYPP	379	1	i5-27o
GheUnG00720	Contig1025	120516	122390	-	CYP749A204	GheCYP749A204	519	FGLGQRSC	456	ETLRLYPP	380	1	i7-29o
GheUnG14920	Contig888	323992	326952	+	CYP706B26	GheCYP706B26	532	FGSGRRKC	463	ETFRLHPA	386	1	i21-43o
GheUnG16030	Contig912	16195	19954	+	CYP90C26	GheCYP90C26	490	FGGGQRLC	434	ETLRLANI	362	1	o4-23i
GheUnG18650	Contig987	169416	171353	-	CYP749A77	GheCYP749A77	516	FGLGPRSC	463	ETLRLYPP	387	1	i7-24o
Probable pseudogene

## Sheet: Dataset S3
Supplementary Dataset 3 – Identification and characterization of CYP450 in Gossypium arboreum genome with haeme binding and ERR triad motif position.
GeneID	Chr	Start	End	Strand	CYP name	CYP renaming	Protein length	Haeme Binding Motif	Motif Pos	ERR Triad Motif	ERR Triad Pos	TM helices	Topology
Ga01G0426	Chr01	4357537	4363391	+	CYP72A502	GaCYP72A502	628	FGWGPRIC	549	YEVLRLYP	473	1	i103-125o
Ga01G0427	Chr01	4368236	4371575	+	CYP72A503b	GaCYP72A503b	517	FGWGPRIC	429	YEVLRLYP	353	1	i5-27o
Ga01G0428	Chr01	4377576	4379459	+	CYP72A503a	GaCYP72A503a	506	FGWGPRIC	444	YEVLRLYP	368	1	i13-32o
Ga01G0429	Chr01	4400066	4401955	+	CYP72A872	GaCYP72A872	483	FGWGPRIC	421	YEVLRLYP	345	1	i13-32o
Ga01G0430	Chr01	4410064	4412749	+	CYP72A504	GaCYP72A504	538	FGWGPRIC	456	CEVLRLYP	380	1	i13-32o
Ga01G0432	Chr01	4417690	4419656	+	CYP72A848	GaCYP72A848	518	FGWGPRIC	456	YEVLRLYP	380	1	i5-27o
Ga01G0584	Chr01	7654576	7659063	-	CYP87B29	GaCYP87B29	462	FGGGNRPC	421	NETLRLEN	348	2	o4-23,i277-299o
Ga01G0684	Chr01	9013804	9015588	-	CYP736A332	GaCYP736A332	495	FGTGRRGC	428	KESFRLHP	363	1	i7-24o
Ga01G0685	Chr01	9023201	9025023	-	CYP736A190	GaCYP736A190	519	FGTGRRGC	452	KESFRLHP	375	1	i13-35o
Ga01G0851	Chr01	12776963	12778692	-	CYP728B54	GaCYP728B54	474	FGGGPRIC	413	METLRMFP	341	0	o
Ga01G0939	Chr01	14111555	14113162	-	CYP71BE64	GaCYP71BE64	511	FGAGRRIC	441	KETLRLHN	366	1	i5-27o
Ga01G0941	Chr01	14138785	14140406	-	CYP71BE165P	GaCYP71BE165P	461	FGAGRRIC	390	KETLRLHP	315	2	o5-24,i396-418o
Ga01G0943	Chr01	14169934	14171676	-	CYP71BE65	GaCYP71BE65	475	FGGGRRMC	405	KETLRLHP	329	1	i7-24o
Ga01G0945	Chr01	14259452	14261084	-	CYP71BE66	GaCYP71BE66	502	FGAGRRMC	433	SETLRLHP	357	1	i5-22o
Ga01G0948	Chr01	14424366	14426178	-	CYP71BE67	GaCYP71BE67	530	FGAGRRIC	435	KETLRLHP	359	1	i5-22o
Ga01G0949	Chr01	14446221	14447959	-	CYP71BE154	GaCYP71BE154	336	FGAGRRIC	246	KETLRLHP	170	1	o4-23i
Ga01G0950	Chr01	14506251	14547168	-	CYP71BE68	GaCYP71BE68	523	FGAGRRIC	452	KETLRLHP	376	1	i7-26o
Ga01G0951	Chr01	14618041	14619714	-	CYP71BE177	GaCYP71BE177	494	FGAGRRMC	423	KETLRLHP	347	2	o4-23,i196-218o
Ga01G1459	Chr01	47226493	47228135	-	CYP82D144	GaCYP82D144	508	FGSGRRMC	441	KETLRLYP	363	1	i7-26o
Ga01G1471	Chr01	47552272	47556342	-	CYP721A90	GaCYP721A90	493	YGLGPRFC	432	DETLRLYP	360	1	i5-27o
Ga01G1795	Chr01	83921866	83924110	+	CYP78A194	GaCYP78A194	530	FGSGRRAC	466	KEVLRLHP	383	1	i26-48o
Ga01G1864	Chr01	89172291	89173892	-	CYP71AP34	GaCYP71AP34	508	FGAGRRSC	442	KETWRLHP	366	0	o
Ga01G1868	Chr01	89218653	89229602	+	CYP71AN68	GaCYP71AN68	900	FGAGRRRC	449	KETLRLHA	375	0	o
Ga01G2175	Chr01	102375634	102377130	-	CYP94B68	GaCYP94B68	498	FQAGPRVC	436	CESMRLYP	354	1	i5-22o
Ga01G2186	Chr01	102638756	102643993	-	CYP87B31	GaCYP87B31	454	FGGGNRAC	404	NETLRLGN	331	1	i5-27o
Ga01G2205	Chr01	103302034	103303569	+	CYP86A128	GaCYP86A128	511	FNAGPRTC	449	AETLRLYP	369	1	i7-24o
Ga01G2302	Chr01	105276800	105279696	-	CYP707A144	GaCYP707A144	500	FGNGVHSC	440	QETLRTAS	370	1	o30-52i
Ga01G2529	Chr01	109225259	109262491	+	CYP87A54	GaCYP87A54	486	FGGGMRFC	428	NETVRLAN	355	1	i17-36o
Ga01G2530	Chr01	109269818	109273210	+	CYP87A56	GaCYP87A56	461	FGGGLRFC	413	NETVRLAN	340	1	i2-21o
Ga01G2646	Chr01	110651464	110654563	+	CYP706B22a	GaCYP706B22a	538	FGSGRRLC	459	KETFRLHP	381	1	i21-43o
Ga01G2647	Chr01	110654671	110657650	+	CYP706B26	GaCYP706B26	532	FGSGRRKC	463	KETFRLHP	385	1	i21-43o
Ga01G2648	Chr01	110662006	110663540	+	CYP706B22b	GaCYP706B22b	484	FGSGRRRC	411	KETFRLHP	333	0	o
Ga01G2649	Chr01	110674227	110675889	-	CYP706B2	GaCYP706B2	527	FGSGRRKC	455	KETFRLHP	377	1	i21-43o
Ga01G2651	Chr01	110708076	110709786	+	CYP706B1	GaCYP706B1	536	FGSGRRMC	466	KETFRLHP	388	1	i21-43o
Ga02G0118	Chr02	909762	916102	-	CYP90C25	GaCYP90C25	516	FGGGQRLC	456	SETLRMAN	383	1	i17-34o
Ga02G0249	Chr02	2276933	2280394	-	CYP81BA1	GaCYP81BA1	507	FGMGRRAC	439	SETLRLYP	364	0	o
Ga02G0468	Chr02	7644065	7645776	+	CYP78A193	GaCYP78A193	537	FGAGRRVC	469	KETLRIHP	391	1	i29-51o
Ga02G0538	Chr02	10177836	10180343	+	CYP89A294P	GaCYP89A294P	414	FGVGKRMC	361	LESLRRHP	293	0	o
Ga02G0707	Chr02	28688928	28690466	-	CYP89A152	GaCYP89A152	512	FGVGRRIC	446	LEGLRRHP	367	1	i5-27o
Ga02G1443	Chr02	94259894	94262042	-	CYP93A87a	GaCYP93A87a	494	FGSGRRSC	428	KETLRLHP	361	1	i7-26o
Ga02G1444	Chr02	94292260	94295877	-	CYP93A87b	GaCYP93A87b	502	FGSGRRSC	436	KETLRLHP	358	1	i2-21o
Ga02G1445	Chr02	94318126	94319758	-	CYP93A88	GaCYP93A88	518	FGSGRRSC	449	KETLRLHP	365	1	i7-26o
Ga02G1448	Chr02	94342032	94344115	+	CYP712A11	GaCYP712A11	515	FGSGRRGC	450	RETLRLHP	367	1	i12-29o
Ga02G1584	Chr02	96747461	96748930	+	CYP94C88	GaCYP94C88	489	FQAGFRVC	422	YESMRLYP	344	1	i7-24o
Ga03G0052	Chr03	334739	336305	+	CYP71BE69	GaCYP71BE69	495	FGAGRRIC	426	KESIRLHP	351	0	o
Ga03G0255	Chr03	2646547	2649205	-	CYP749A64	GaCYP749A64	483	FGLGLRSC	417	NETLRLYG	340	0	o
Ga03G0285	Chr03	2943375	2990899	+	CYP749A210P	GaCYP749A210P	475	FGLGPRFC	412	YETLRLYG	300	0	o
Ga03G0286	Chr03	2992249	2994177	+	CYP749A209	GaCYP749A209	512	FGLGPRFC	449	YETLRLYG	372	1	i3-25o
Ga03G0287	Chr03	2996587	2998548	+	CYP749A195	GaCYP749A195	495	FGLGPRSC	432	YETLRLYG	355	1	i7-29o
Ga03G0288	Chr03	3008774	3012509	+	CYP749A218	GaCYP749A218	513	FGLGPRSC	453	NETLRLYG	376	1	i7-29o
Ga03G0289	Chr03	3016799	3019299	+	CYP749A206	GaCYP749A206	511	FGLGPRSC	448	YETLRLYG	371	1	i3-25o
Ga03G0290	Chr03	3050055	3060760	+	CYP749A66	GaCYP749A66	512	FGLGPRSC	449	NETLRLYG	372	1	i3-25o
Ga03G0291	Chr03	3084408	3107019	+	CYP749A216	GaCYP749A216	509	FGLGPRSC	447	NETLRLYG	370	1	i7-29o
Ga03G0292	Chr03	3128990	3130929	+	CYP749A198	GaCYP749A198	516	FGIGPRSC	453	NETSRLYG	376	1	i7-29o
Ga03G0293	Chr03	3138230	3163235	+	CYP749A196	GaCYP749A196	516	FGLGPRTC	453	NETLRLYG	376	1	i7-29o
Ga03G0294	Chr03	3183939	3196697	+	CYP749A197_193-chimera?	GaCYP749A197_193	517	FGLGPRNC	454	YETLRLYG	377	1	i7-29o
Ga03G0295	Chr03	3203505	3206883	+	CYP749A68_A70 chimeric seq?	GaCYP749A68_A70	495	FGLGPRNC	432	YETLRLYG	355	1	i3-25o
Ga03G0757	Chr03	11968093	11983029	+	CYP733A1	GaCYP733A1	693	FGSGPRMC	419	SETLRRAT	349	6	i5-27,o516-538,i558-580,o590-612,i624-646,o651-673i
Ga03G0968	Chr03	22911400	22913017	-	CYP81B88	GaCYP81B88	508	FGTGRRGC	437	SETFRMCP	363	1	i5-24o
Ga03G0976	Chr03	25153382	25155545	+	CYP81BQ6	GaCYP81BQ6	507	FGLGRRAC	435	NETLRLYP	360	1	i2-24o
Ga03G1445	Chr03	92259051	92260710	+	CYP78A192	GaCYP78A192	518	FGSGRRVC	455	KETLRVHP	378	2	o20-42,i49-71o
Ga03G1788	Chr03	117243488	117245225	-	CYP71AS20	GaCYP71AS20	450	FGGGRRIC	403	KETLRLHP	327	0	o
Ga03G2053	Chr03	126928573	126930609	+	CYP51G32	GaCYP51G32	486	FGGGRHGC	422	KEALRLHP	341	1	i7-29o
Ga03G2470	Chr03	133326160	133330320	-	CYP707A138	GaCYP707A138	474	FGNGVHAC	410	GETLQLYS	46	1	i3-21o
Ga04G0014	Chr04	165113	168308	-	CYP78A190	GaCYP78A190	514	FGSGRRVC	444	KEVLRLHP	367	2	o4-21,i28-50o
Ga04G0124	Chr04	1278334	1279998	+	CYP82C137	GaCYP82C137	497	FGAGRRIC	447	KETMRLYP	369	1	i7-26o
Ga04G0125	Chr04	1281577	1283299	+	CYP82C51	GaCYP82C51	549	FGSGRRIC	481	RETLRLYP	403	2	o38-57,i254-276o
Ga04G0419	Chr04	5310230	5314517	+	CYP86B32	GaCYP86B32	644	FNGGPRLC	475	SEALRLYP	398	1	i23-45o
Ga04G0935	Chr04	29844439	29846090	+	CYP76A126	GaCYP76A126	485	FGAGRRMC	417	KETFRLHP	341	0	o
Ga04G0936	Chr04	29891479	29893090	+	CYP76A49	GaCYP76A49	512	FGAGRRMC	443	KETFRLHP	367	2	o4-23,i69-91o
Ga04G1028	Chr04	40924825	40926327	-	CYP94C83	GaCYP94C83	500	FQGGFRVC	438	YESMRLYP	360	1	i13-35o
Ga04G1232	Chr04	75326912	75328438	-	CYP94B69	GaCYP94B69	508	FQAGPRIC	445	CESMRLYP	363	1	i7-29o
Ga04G1903	Chr04	95253486	95255419	+	CYP714E35	GaCYP714E35	513	FGFGPHTC	454	NETLRLYP	378	1	i5-27o
Ga04G1926	Chr04	95624645	95626180	-	CYP96K5	GaCYP96K5	511	FIAGPRIC	450	CETLRLYP	372	1	i5-27o
Ga04G2017	Chr04	97010405	97013303	-	CYP714A30	GaCYP714A30	519	FGVGSRLC	460	QEALRLYP	384	1	i7-29o
Ga05G0202	Chr05	1801585	1804397	-	CYP734A56	GaCYP734A56	524	FGLGVRTC	454	NESLRLYP	378	1	i7-29o
Ga05G0352	Chr05	3187582	3189503	+	CYP72D17	GaCYP72D17	517	FGWGPRTC	458	YEVLRLYP	382	1	i7-29o
Ga05G0443	Chr05	3926617	3929049	-	CYP711A55	GaCYP711A55	539	FGIGPRAC	477	KEAMRFYI	401	1	i20-42o
Ga05G0674	Chr05	5930570	5934689	+	CYP714A29	GaCYP714A29	523	FGLGTRLC	464	QEAMRLYP	388	1	i7-29o
Ga05G0726	Chr05	6286341	6288077	-	CYP76AG4	GaCYP76AG4	527	FGTGRRSC	458	KEVFRLHP	382	1	o15-37i
Ga05G0887	Chr05	7700809	7702323	-	CYP94C84	GaCYP94C84	504	FQAGQRVC	440	CESLRLFP	363	1	i13-35o
Ga05G0946	Chr05	8281320	8282855	-	CYP86A129	GaCYP86A129	511	FNAGPRTC	449	AETLRLYP	369	1	i7-24o
Ga05G1029	Chr05	8905818	8907729	-	CYP714F8	GaCYP714F8	511	FGLGARVC	452	LEVLRLYP	376	1	i7-29o
Ga05G1159	Chr05	10125806	10128052	+	CYP79D64	GaCYP79D64	550	FSTGMRGC	476	REAFRLHP	397	1	i21-43o
Ga05G1220	Chr05	10797921	10800343	-	CYP716A120	GaCYP716A120	476	FGGGPRMC	418	CEVMRLAP	347	1	o4-23i
Ga05G1430	Chr05	12635756	12639228	-	CYP90D39	GaCYP90D39	499	FGGGQRLC	441	TETLRMGN	369	1	i21-43o
Ga05G1584	Chr05	14100564	14102072	+	CYP710A140	GaCYP710A140	502	FGAGPHQC	432	REVIRYRP	358	1	i2-24o
Ga05G1585	Chr05	14137213	14138721	+	CYP710A69	GaCYP710A69	502	FGAGPHQC	432	REVIRYRP	358	1	i2-24o
Ga05G2071	Chr05	18968257	18970319	+	CYP721A96	GaCYP721A96	489	FALGPRNC	428	NETLRLYS	356	1	o4-26i
Ga05G2072	Chr05	18974086	18976194	+	CYP721A94	GaCYP721A94	505	FGLGSRIC	444	NETLRLYS	372	1	i7-29o
Ga05G2098	Chr05	19148585	19150042	-	CYP82D326P	GaCYP82D326P	383	FSSGRRMC	312	KETMRLYP	234	0	o
Ga05G2099	Chr05	19191825	19193482	-	CYP82D113	GaCYP82D113	522	FGSGRRSC	454	KETLRMYP	376	1	i7-24o
Ga05G2100	Chr05	19199022	19200680	-	CYP82D112	GaCYP82D112	522	FGSGRRSC	454	KETLRLYP	376	1	i7-24o
Ga05G2101	Chr05	19273264	19274937	+	CYP82D111	GaCYP82D111	510	FGSGRRSC	442	KETFRMYP	364	1	i7-24o
Ga05G2102	Chr05	19363923	19365660	-	CYP82D146	GaCYP82D146	526	FGAGRRLC	459	KESLRLYP	381	1	i7-29o
Ga05G2103	Chr05	19366339	19368166	-	CYP82C54	GaCYP82C54	526	FGSGRRSC	457	KETLRLYP	379	2	o4-23,i226-245o
Ga05G2108	Chr05	19462573	19474159	+	CYP701A52	GaCYP701A52	480	FGAGKRAC	419	HETLRKHS	344	1	i13-32o
Ga05G2148	Chr05	19870386	19873258	-	CYP707A139	GaCYP707A139	478	FGSGVHAC	416	GETLQLYS	47	1	o4-21i
Ga05G2206	Chr05	20480322	20482025	-	CYP81B90	GaCYP81B90	531	FGTGRRRC	460	KETFRMCP	397	1	i35-54o
Ga05G2212	Chr05	20533300	20535761	+	CYP81T4	GaCYP81T4	517	FGVGRRAC	446	SETMRLFP	373	1	i3-25o
Ga05G2770	Chr05	28194371	28196317	-	CYP82D147	GaCYP82D147	526	FGSGRRVC	458	NETTRLYP	380	1	i9-31o
Ga05G2796	Chr05	28682792	28684384	-	CYP81B89	GaCYP81B89	432	FGNGRRRC	361	NETFRIKP	304	0	o
Ga05G2980	Chr05	32161913	32163671	-	CYP79A179	GaCYP79A179	532	FSTGRRGC	461	WEAFRIHP	381	1	i26-45o
Ga05G3150	Chr05	37512170	37513768	-	CYP736A342	GaCYP736A342	497	FGAGRRLC	432	RETLRLHP	355	1	i5-27o
Ga05G3151	Chr05	37605648	37607259	-	CYP736A191	GaCYP736A191	485	FGAGRRLC	415	RETLRLHP	338	1	i2-24o
Ga05G3412	Chr05	50075857	50077520	-	CYP82D109	GaCYP82D109	522	FGSGRRSC	454	KETLRMYP	376	1	i7-24o
Ga05G3691	Chr05	83335814	83339979	+	CYP71BE74	GaCYP71BE74	537	FGAGRRVC	437	KETLRLHP	361	1	i7-26o
Ga05G3693	Chr05	83371081	83375061	+	CYP71BE71	GaCYP71BE71	532	FGAGRRVC	419	KETLRLHP	343	2	i7-26,o507-529i
Ga05G3694	Chr05	83410917	83412532	+	CYP71BE70	GaCYP71BE70	507	FGAGRRIC	436	KETLRLHP	360	1	i7-25o
Ga05G3695	Chr05	83481213	83488003	+	CYP71BE170P	GaCYP71BE170P	344	FGAGMRIC	273	KETLRLYP	199	1	i7-25o
Ga05G4078	Chr05	93619145	93620792	+	CYP706Q5	GaCYP706Q5	444	FGSGRRMC	375	KETLRLHP	299	1	i21-43o
Ga05G4080	Chr05	93706632	93708279	+	CYP706Q1	GaCYP706Q1	444	FGSGRRMC	375	KETLRLHP	299	1	i25-44o
Ga05G4278	Chr05	96899391	96900953	-	CYP706Q7	GaCYP706Q7	426	FGSGRRMC	357	KETLRLHP	281	0	o
Ga06G0089	Chr06	725454	731259	+	CYP722A1	GaCYP722A1	500	FGMGARTC	438	KESLRMAS	366	1	i5-27o
Ga06G0155	Chr06	1221863	1246720	-	CYP82D331	GaCYP82D331	550	FGSGRRMC	479	KETLRLYP	401	1	i7-29o
Ga06G0156	Chr06	1253425	1255791	-	CYP82D150	GaCYP82D150	526	FGSGRRMC	455	KETLRLYP	377	1	i7-29o
Ga06G0158	Chr06	1297420	1322995	-	CYP82D330	GaCYP82D330	998	FGSGRRMC	903	KETLRLYP	376	1	i7-29o
Ga06G0160	Chr06	1354402	1356083	-	CYP82D332P	GaCYP82D332P	467	FGSGRRMC	396	KETLRLYP	318	1	i7-29o
Ga06G0161	Chr06	1361411	1366260	-	CYP82D329	GaCYP82D329	518	FGSGRRMC	440	KETLRLYP	362	1	i7-29o
Ga06G0162	Chr06	1368212	1369866	-	CYP82D110	GaCYP82D110	510	FGSGRRSC	442	KETLRMYP	364	1	i7-24o
Ga06G0168	Chr06	1427459	1430483	+	CYP701A18	GaCYP701A18	502	FGAGKRAC	441	HETLRKHS	366	1	i5-22o
Ga06G0239	Chr06	2135437	2137019	-	CYP81B177	GaCYP81B177	500	FGAGRRGC	429	CETLRMYP	355	0	o
Ga06G0599	Chr06	9327158	9329726	-	CYP734A57	GaCYP734A57	515	FGLGVRTC	453	NESLRLYP	377	1	i7-29o
Ga06G0818	Chr06	15615881	15618101	-	CYP92A133	GaCYP92A133	517	FGSGRRMC	445	KETMRKHP	369	0	o
Ga06G1291	Chr06	53939488	53941188	-	CYP78A195	GaCYP78A195	529	FGAGRRVC	462	KETLRLHP	380	1	i29-51o
Ga06G1662	Chr06	108706551	108708062	-	CYP710A70	GaCYP710A70	463	FGAGPHQC	393	READRFDP	366	1	i7-29o
Ga06G1800	Chr06	117985339	117986856	+	CYP77B26	GaCYP77B26	505	FGAGRRIC	444	KETLRRHP	364	0	o
Ga06G1925	Chr06	120831740	120835269	-	CYP88A77	GaCYP88A77	494	FGAGSRLC	431	DETLRLIT	360	1	i7-26o
Ga06G2005	Chr06	122974697	122979016	-	CYP90A46	GaCYP90A46	472	FGGGPRLC	414	NETLRVAN	339	1	i2-24o
Ga06G2160	Chr06	126443446	126446569	-	CYP727B4	GaCYP727B4	559	FGSGARAC	495	YESARVMP	388	1	i31-53o
Ga06G2188	Chr06	126937918	126941581	-	CYP728G3	GaCYP728G3	494	FGAGPRVC	435	QELMRVNP	362	1	i20-42o
Ga06G2371	Chr06	129738254	129739774	-	CYP77B27	GaCYP77B27	506	FGAGRRIC	445	KETFRRHP	365	0	o
Ga07G0026	Chr07	261893	264685	-	CYP734A58	GaCYP734A58	518	FGLGVRTC	452	NESLRLYP	376	1	i7-29o
Ga07G0483	Chr07	5220494	5222826	+	CYP704A127	GaCYP704A127	562	FQAGPRIC	501	TETLRLYP	423	3	i37-59,o63-85,i351-373o
Ga07G0602	Chr07	6628553	6630819	+	CYP87B28	GaCYP87B28	444	FGGGNRTC	385	NESLRLAN	312	0	o
Ga07G0656	Chr07	7350841	7353837	-	CYP71AH6	GaCYP71AH6	528	FGVGRRGC	463	KETLRLHP	387	2	o30-47,i91-113o
Ga07G0658	Chr07	7382073	7395736	-	CYP71AH43	GaCYP71AH43	465	FGGGRRGC	400	KETLTLYP	343	0	o
Ga07G0660	Chr07	7428736	7430689	+	CYP71AN47	GaCYP71AN47	416	FGCGRRDC	350	KETLRLHP	274	0	o
Ga07G0916	Chr07	11967841	11969756	+	CYP81AT5	GaCYP81AT5	497	FKPERRAC	426	LEAQRLYP	372	0	o
Ga07G0930	Chr07	12198782	12200439	+	CYP81AT9P	GaCYP81AT9P	340	FGLGKRAC	309	LEAQRLYT	256	0	o
Ga07G0931	Chr07	12218442	12220069	+	CYP81AT6P	GaCYP81AT6P	425	FGLGRRAC	354	LEAQRLHP	282	0	o
Ga07G0950	Chr07	12815606	12818557	-	CYP85A1	GaCYP85A1	466	FGGGTRQC	409	FETSRLAT	337	1	i3-25o
Ga07G1002	Chr07	13684767	13688100	+	CYP82L15	GaCYP82L15	515	FSSGRRSC	445	KETLRLYP	367	2	o4-21,i217-234o
Ga07G1004	Chr07	13828185	13830273	+	CYP82L32	GaCYP82L32	521	FSSGRRSC	445	KETLRLYP	367	0	o
Ga07G1078	Chr07	15661393	15665510	-	CYP707A143	GaCYP707A143	491	FGNGVHSC	431	QETLRRAS	361	1	o23-45i
Ga07G1110	Chr07	16500151	16501695	+	CYP86A130	GaCYP86A130	514	FNAGPRTC	452	AETLRLYP	372	1	i5-27o
Ga07G1336	Chr07	23772259	23773871	+	CYP75A20a	GaCYP75A20a	510	FGAGRRIC	440	KETFRKHP	361	1	i7-26o
Ga07G1338	Chr07	23801076	23802688	+	CYP75A20b	GaCYP75A20b	510	FGAGRRIC	440	KETFRKHP	361	1	i7-26o
Ga07G1794	Chr07	47139185	47141095	-	CYP82J10	GaCYP82J10	530	FGSGRRSC	459	KETLRLYP	381	0	o
Ga07G2048	Chr07	80532132	80534748	-	CYP85A41	GaCYP85A41	465	FGGGTRQC	408	FETSRLAT	336	1	i2-24o
Ga07G2056	Chr07	81035642	81037613	+	CYP714E36	GaCYP714E36	516	FGVGPRVC	457	QESLRLYP	381	1	i7-29o
Ga07G2057	Chr07	81071401	81080797	+	CYP714E80	GaCYP714E80	487	FGVGPRVC	428	QESLRLYL	352	1	i7-29o
Ga07G2112	Chr07	83948511	83955624	-	CYP97B47	GaCYP97B47	579	FGGGPRKC	515	VESLRLYP	411	0	o
Ga07G2226	Chr07	89865403	89867249	+	CYP79D118	GaCYP79D118	488	FSRGRRGC	417	REAFRLHP	336	1	i5-27o
Ga07G2228	Chr07	89966490	89968307	+	CYP79D120	GaCYP79D120	537	FGRGRRGC	461	REAFRLHP	380	1	i7-29o
Ga07G2230	Chr07	90358525	90360331	+	CYP79D121	GaCYP79D121	527	FGRGRRGC	451	REAFRLHP	370	1	i7-29o
Ga07G2393	Chr07	93041874	93043479	+	CYP71BE75	GaCYP71BE75	493	FGAGRRMC	423	KETMRLHP	363	1	o4-26i
Ga07G2443	Chr07	93781712	93783235	+	CYP94A72a	GaCYP94A72a	507	FQAGPRVC	442	CECMRLYP	360	1	i7-24o
Ga08G0092	Chr08	669732	671285	+	CYP94C85	GaCYP94C85	517	FQAGLRVC	455	CESLRLFP	378	1	i27-49o
Ga08G0152	Chr08	1136262	1137827	-	CYP94F9	GaCYP94F9	521	FHCGPRTC	450	SESLRLFP	371	2	o10-32,i311-333o
Ga08G0212	Chr08	1750838	1755509	+	CYP716A119	GaCYP716A119	480	FGGGPRMC	420	CEVLRLAP	349	1	i5-24o
Ga08G1284	Chr08	83741828	83743606	-	CYP78A196	GaCYP78A196	532	FGSGRRTC	469	KEVLRMHP	386	1	i26-48o
Ga08G1475	Chr08	100295598	100299107	-	CYP78A197	GaCYP78A197	578	FGSGRRTC	468	KEVLRLHP	387	1	i25-47o
Ga08G1533	Chr08	103253760	103256813	+	CYP704A128	GaCYP704A128	512	FHAGPRIC	449	TETLRLYP	372	1	i5-27o
Ga08G1573	Chr08	104689212	104690795	-	CYP86A132	GaCYP86A132	527	FNAGPRIC	450	SETLRLYP	371	1	i7-24o
Ga08G1764	Chr08	110350584	110353936	-	CYP707A141	GaCYP707A141	446	FGNGTHSC	387	QETLRVAS	317	0	o
Ga08G1868	Chr08	113375975	113379727	-	CYP88A79	GaCYP88A79	487	FGAGSRIC	428	DETLRRAS	357	1	i2-24o
Ga08G2029	Chr08	117456163	117457791	-	CYP706D9	GaCYP706D9	493	FGSGRRMC	424	KETLRLHP	346	2	o4-23,i162-181o
Ga08G2073	Chr08	118445720	118446948	+	CYP76F89	GaCYP76F89	380	FGGGRRIC	316	KETLRLHP	240	0	o
Ga08G2075	Chr08	118469368	118481952	+	CYP76F175	GaCYP76F175	497	FGGGRRIC	433	KETMRLHP	357	1	i2-21o
Ga08G2076	Chr08	118494474	118496052	+	CYP76F91	GaCYP76F91	490	FGSGRRIC	426	KETMRLHP	350	1	i7-24o
Ga08G2078	Chr08	118530315	118531881	+	CYP76F159	GaCYP76F159	453	FGGGRRIC	389	KETLRLHP	313	0	o
Ga08G2156	Chr08	120146207	120147811	-	CYP86A131	GaCYP86A131	534	FNAGPRIC	450	SETLRLYP	371	0	o
Ga08G2220	Chr08	120934235	120935755	+	CYP94A74	GaCYP94A74	506	FQAGPRIC	441	CESMRLYP	359	1	i2-24o
Ga08G2596	Chr08	126158036	126159580	+	CYP89A153	GaCYP89A153	514	FGVGRRIC	450	LEGLRRHP	367	0	o
Ga08G2749	Chr08	127649924	127652582	-	CYP72A506	GaCYP72A506	521	FGGGPRIC	462	NEVLRLYP	385	1	i12-34o
Ga08G2815	Chr08	128172033	128175118	-	CYP734A59	GaCYP734A59	517	FGLGVRTC	458	NESLRLYP	382	1	i12-34o
Ga09G0178	Chr09	3808821	3812031	-	CYP736A192	GaCYP736A192	480	FGAGRRRC	413	KESLRLHP	336	1	i7-26o
Ga09G0179	Chr09	3822697	3825988	-	CYP736A350	GaCYP736A350	468	FGSGRRGC	401	KESLRLHP	324	1	i7-26o
Ga09G0349	Chr09	9437026	9438466	-	CYP96A239P	GaCYP96A239P	411	FGAGPRIC	350	CEALRLYP	272	0	o
Ga09G0350	Chr09	9451620	9453128	-	CYP96A131	GaCYP96A131	502	FGAGPRIC	442	CEALRLYP	364	1	i5-24o
Ga09G0362	Chr09	9962581	9964091	-	CYP96A234	GaCYP96A234	435	FGAGPRIL	400	CEALRLYP	322	1	i5-24o
Ga09G0479	Chr09	16882650	16884178	-	CYP94B71	GaCYP94B71	498	FQAGPRVC	435	CESMRLYP	352	1	i7-29o
Ga09G0570	Chr09	32288026	32291766	-	CYP715A41	GaCYP715A41	459	FGFGGRMC	400	NEVLRRYS	323	0	o
Ga09G0635	Chr09	43578320	43579906	+	CYP736A193	GaCYP736A193	493	FGSGRRVC	428	RETLRLHP	351	1	i7-25o
Ga09G0636	Chr09	44285455	44287053	+	CYP736A196	GaCYP736A196	497	FGAGRRLC	432	KEIFRLHP	355	1	i5-27o
Ga09G1115	Chr09	64937998	64939500	+	CYP94C86	GaCYP94C86	500	FQAGKRVC	438	YESLRLFP	361	1	i7-29o
Ga09G1433	Chr09	70657864	70659516	+	CYP712J4	GaCYP712J4	508	FGSGRRVC	441	KETLRLHS	366	1	i7-28o
Ga09G1434	Chr09	70659988	70661599	+	CYP712C7	GaCYP712C7	453	FGRGRRGC	385	KEILRLHP	310	1	i5-24o
Ga09G1435	Chr09	70702168	70703827	+	CYP712C5	GaCYP712C5	512	FGSGRRAC	444	KETLRLHP	369	1	i13-30o
Ga09G1437	Chr09	70712385	70715898	+	CYP93A89	GaCYP93A89	535	FGSGRRSC	465	KETLRLHP	382	1	i25-44o
Ga09G1578	Chr09	73117440	73118978	-	CYP94C87	GaCYP94C87	512	FQAGFRVC	446	YESMRLYP	368	1	i13-35o
Ga09G2032	Chr09	78227298	78229339	+	CYP715A39	GaCYP715A39	521	FGFGGRMC	462	KEVLRLYS	385	1	i13-35o
Ga09G2170	Chr09	79410288	79419239	-	CYP76F170	GaCYP76F170	500	FGAGRRIC	436	KETFRMHP	360	0	o
Ga09G2174	Chr09	79463383	79477238	-	CYP76F171	GaCYP76F171	473	FGAGRRIC	409	KETFRMHP	333	0	o
Ga09G2223	Chr09	79823726	79826911	+	CYP88P2	GaCYP88P2	448	FSTGSSTC	389	NETLRICT	334	1	i5-22o
Ga09G2270	Chr09	80425236	80427053	+	CYP93B85	GaCYP93B85	486	FGTGRRGC	419	LESFRLHP	332	1	i5-24o
Ga09G2311	Chr09	80805559	80811638	-	CYP736A351	GaCYP736A351	499	FGAGRRGC	432	KESFRLHP	356	1	i7-24o
Ga10G0036	Chr10	407055	411656	+	CYP90A47	GaCYP90A47	470	FGGGPRLC	411	NETLRVAN	337	1	i2-21o
Ga10G0052	Chr10	559316	561139	+	CYP71BG3_A	GaCYP71BG3	502	FGGGRRGC	435	KEAMRLHP	359	1	i9-26o
Ga10G0217	Chr10	3016101	3018846	-	CYP81AZ3	GaCYP81AZ3	494	FGLGRRGC	425	SETLRLTP	353	1	i3-22o
Ga10G0401	Chr10	6195174	6197923	-	CYP706P1	GaCYP706P1	529	FGSGRRIC	460	KETFRIHP	382	1	i19-41o
Ga10G0630	Chr10	11050746	11059620	-	CYP71AN74P	GaCYP71AN74P	405	FGFEKRRC	346	KETLRLHP	286	1	i13-30o
Ga10G0631	Chr10	11059763	11068654	+	CYP71AN52	GaCYP71AN52	439	FGFGRKRC	372	KETLRLHP	296	0	o
Ga10G0632	Chr10	11154512	11156125	-	CYP71AN51	GaCYP71AN51	507	FGFGRRRC	440	KETLRLHP	364	1	i9-28o
Ga10G0633	Chr10	11159241	11160854	-	CYP71AN50	GaCYP71AN50	507	FGFGRRRC	440	KETLRLHP	364	1	i9-28o
Ga10G0634	Chr10	11298269	11299902	-	CYP71AN75	GaCYP71AN75	500	FGFGRRSY	444	KETLRLHP	368	0	o
Ga10G0643	Chr10	11706798	11708662	+	CYP714E34	GaCYP714E34	510	FGTGPRSC	451	YETLRLYP	375	1	i7-29o
Ga10G0660	Chr10	12227230	12228746	+	CYP77A39	GaCYP77A39	495	VWVGRRIC	430	KELLRRHP	360	1	i5-22o
Ga10G0688	Chr10	12663640	12665145	-	CYP94D66	GaCYP94D66	501	FHGGPRMC	441	SESLRLYP	363	1	i5-27o
Ga10G0709	Chr10	13034818	13036570	-	CYP83F48	GaCYP83F48	530	FGAGRRVC	421	KETFRLQP	345	1	i7-29o
Ga10G0710	Chr10	13061211	13062268	-	CYP83F63	GaCYP83F63	325	FGAGRRVC	259	KETFRLQP	183	0	o
Ga10G0711	Chr10	13082958	13084541	-	CYP83F64	GaCYP83F64	487	FGAGRRVC	421	KETFRLQP	345	1	i2-19o
Ga10G0712	Chr10	13104085	13105704	+	CYP83F47	GaCYP83F47	503	FGAGRRVC	437	KETFRLHP	361	2	o5-22,i298-320o
Ga10G0714	Chr10	13145852	13165333	+	CYP83F46	GaCYP83F46	1002	FGAGRRVC	937	KETFRLQA	361	3	i5-22,o298-320,i494-516o
Ga10G0909	Chr10	19635345	19636956	+	CYP718A21	GaCYP718A21	484	FGGGPRTC	420	RECMRLFP	350	1	i7-25o
Ga10G0923	Chr10	20126039	20127912	+	CYP79A116	GaCYP79A116	555	FGTGRRGC	485	REAFRLHT	406	1	i30-52o
Ga10G0968	Chr10	21301307	21303566	+	CYP73A26	GaCYP73A26	483	FGVGRRSC	418	KETLRLRM	340	0	o
Ga10G1484	Chr10	80411991	80413928	-	CYP749A222	GaCYP749A222	520	FGMGPRAC	457	NETLRLYA	380	1	i12-34o
Ga10G1486	Chr10	80454629	80456541	-	CYP749A223	GaCYP749A223	507	FGMGPRAC	444	NETLRLYT	367	1	i7-29o
Ga10G1490	Chr10	81422804	81424431	+	CYP71AN53	GaCYP71AN53	502	FGIGRRTC	436	KETLRLHP	359	1	i13-35o
Ga10G2004	Chr10	108540020	108541546	-	CYP84A77	GaCYP84A77	508	FGSGRRSC	438	KETLRLHP	362	0	o
Ga10G2503	Chr10	123783198	123785818	+	CYP92A132	GaCYP92A132	510	FGSGRRKC	439	KEAMRLHP	363	1	i7-26o
Ga10G2504	Chr10	123793184	123795304	+	CYP92A131	GaCYP92A131	510	FGAGRRMC	439	KETMRLHP	363	1	i5-24o
Ga10G2946	Chr10	128296039	128297568	+	CYP77B25	GaCYP77B25	509	FGAGRRIC	444	RETFRRHP	364	0	o
Ga10G2951	Chr10	128325344	128346742	+	CYP728D32	GaCYP728D32	2143	FGGGATIC	388	METLRMNP	343	0	o
Ga10G3039	Chr10	128948527	128951385	-	CYP716C26	GaCYP716C26	486	FGGGLRMC	427	YEVMRLTP	355	1	i7-29o
Ga11G0088	Chr11	603257	607505	+	CYP97C38	GaCYP97C38	548	FSGGPRKC	479	TESLRLYP	401	0	o
Ga11G0096	Chr11	656997	658970	+	CYP76G21	GaCYP76G21	513	FGSGRRMC	444	KETLRLHP	367	1	i5-22o
Ga11G0098	Chr11	691173	693090	+	CYP76G42P	GaCYP76G42P	434	FGSGRRMC	365	KEILRLHP	288	0	o
Ga11G0365	Chr11	4740246	4741784	-	CYP89A156	GaCYP89A156	512	FGVGRRIC	449	LEGLRRHP	367	1	i5-24o
Ga11G0366	Chr11	4746192	4747721	-	CYP89A155	GaCYP89A155	509	FGVGRRIC	446	LEGLRRHP	368	1	i5-27o
Ga11G0367	Chr11	4753057	4754583	-	CYP89A154	GaCYP89A154	508	FGVGRRIC	445	LEGLRRHP	367	0	o
Ga11G1559	Chr11	55345139	55346662	-	CYP96A133	GaCYP96A133	507	FNAGPRTC	446	CEALRLYP	368	0	o
Ga11G1591	Chr11	60416743	60418242	+	CYP96A130	GaCYP96A130	499	FNAGPRTC	438	CEALRLYP	360	0	o
Ga11G1653	Chr11	68655154	68656678	+	CYP71BC7	GaCYP71BC7	423	FGAGRRSC	354	KETFRLHP	330	0	o
Ga11G1654	Chr11	68808698	68810342	-	CYP71BC6	GaCYP71BC6	504	FGAGRRIC	435	KETFRLQP	359	1	i13-32o
Ga11G1872	Chr11	86602060	86603644	+	CYP81AT2	GaCYP81AT2	500	FGMGRRAC	428	SETLRLYP	355	1	i7-24o
Ga11G1988	Chr11	94547474	94550643	+	CYP82C136	GaCYP82C136	523	FGLGRRSC	453	KETLRLYP	374	2	o4-22,i224-246o
Ga11G1990	Chr11	94606266	94607443	+	CYP82C96	GaCYP82C96	198	FGSGRRSC	88	KETLRLYP	9	0	o
Ga11G1991	Chr11	94634164	94635888	+	CYP82C141	GaCYP82C141	520	FGSGRRSC	450	KETLRLYP	371	2	o4-26,i227-246o
Ga11G2042	Chr11	96771604	96776381	+	CYP90B35	GaCYP90B35	492	FGGGPRLC	428	NETLRLGN	345	1	i7-24o
Ga11G2094	Chr11	97780950	97784704	+	CYP90C26	GaCYP90C26	490	FGGGQRLC	434	SETLRLAN	361	1	o4-23i
Ga11G2107	Chr11	98229216	98231012	+	CYP84A78	GaCYP84A78	521	FGSGRRSC	451	KETLRLHP	375	1	i21-38o
Ga11G2292	Chr11	102063217	102066048	-	CYP735A40	GaCYP735A40	522	FAAGPRNC	458	NESLRLYP	385	1	i12-34o
Ga11G2389	Chr11	103912758	103923359	-	CYP74	GaCYP74B25	512	No haeme binding motif	-	YETLRMNP	438	0	o
Ga11G2622	Chr11	108244020	108246522	-	CYP92A28	GaCYP92A28	501	FGAGRRMC	429	KETMRLHP	353	1	i5-24o
Ga11G3010	Chr11	114403052	114404885	-	CYP78A198	GaCYP78A198	528	FGSGRRTC	459	KEVLRLHP	390	1	i25-47o
Ga11G3121	Chr11	115952456	115954042	+	CYP86A133	GaCYP86A133	528	FNAGPRIC	450	SETLRLFP	371	1	i7-24o
Ga11G3200	Chr11	116585783	116587852	-	CYP704A263	GaCYP704A263	506	FQAGPRIC	443	TETLRLYP	365	1	i7-26o
Ga11G3201	Chr11	116634308	116636386	-	CYP704A264	GaCYP704A264	506	FQAGPRVC	443	TETIRLYP	365	1	i7-26o
Ga11G3202	Chr11	116647336	116649263	-	CYP704A129	GaCYP704A129	523	FHAGPRIC	455	TETLRLYP	378	1	i7-29o
Ga11G3628	Chr11	120364159	120366204	+	CYP84A79	GaCYP84A79	517	FGSGRRSC	447	KETLRLHP	371	1	i13-30o
Ga11G3703	Chr11	120964630	120966177	+	CYP94B70	GaCYP94B70	515	FQAGPRVC	453	CESMRLYP	371	1	i5-27o
Ga11G4049	Chr11	123771183	123772855	+	CYP706Q9	GaCYP706Q9	457	FGSGRRIC	388	KETLRLHP	312	1	i23-45o
Ga11G4050a	Chr11	123777553	123793526	+	CYP706Q4	GaCYP706Q4	275	FGSGRRMC	652			1	i21-43o
Ga11G4050b	Chr11	123777553	123793526	+	CYP706Q12	GaCYP706Q12	446					1	i5-24o
Ga12G0136	Chr12	1133717	1136889	-	CYP706P4	GaCYP706P4	531	FGSGRRIC	462	KETLRIHP	384	2	o23-45,i58-75o
Ga12G0137	Chr12	1142832	1145383	-	CYP706P6	GaCYP706P6	530	FGSGRRIC	461	KETLRIHP	383	1	i20-42o
Ga12G0138	Chr12	1148658	1151413	-	CYP706P2	GaCYP706P2	531	FGSGRRIC	462	KETLRIHP	384	1	i20-42o
Ga12G0139	Chr12	1154949	1158078	-	CYP706P3	GaCYP706P3	530	FGSGRRIC	461	KETLRIHP	383	1	i20-42o
Ga12G0188	Chr12	1521919	1523421	-	CYP87A96P	GaCYP87A96P	178	FGSGVRLC	118	NETIRLGN	65	0	o
Ga12G0220	Chr12	1767393	1772776	+	CYP715A40	GaCYP715A40	519	FGFGGRMC	460	KEVLRLYS	383	2	o10-32,i98-117o
Ga12G0395	Chr12	3305380	3307213	+	CYP78A201	GaCYP78A201	530	FGSGRRSC	467	KEVLRLHP	385	1	i26-48o
Ga12G0500	Chr12	4275639	4277222	+	CYP86A134	GaCYP86A134	527	FNAGPRIC	450	SETLRLYP	371	1	i5-27o
Ga12G0535	Chr12	4582794	4587469	-	CYP87A55	GaCYP87A55	485	FGGGMRFC	435	NETVRLAN	362	1	i20-42o
Ga12G0582	Chr12	5019052	5021039	-	CYP706C46	GaCYP706C46	502	FGSGRRIC	432	KESLRLHP	356	1	i2-21o
Ga12G0754	Chr12	7093355	7096214	+	CYP76Y16	GaCYP76Y16	488	FGAGRRIC	426	KETMRLHP	350	0	o
Ga12G0755	Chr12	7096542	7098112	+	CYP76Y17	GaCYP76Y17	499	FGAGRRLC	432	KETLRLHP	356	0	o
Ga12G0790	Chr12	7430893	7432902	+	CYP707A142	GaCYP707A142	463	FGNGTHSC	405	QETLRVAS	335	1	i5-27o
Ga12G0917	Chr12	9403177	9406409	+	CYP71BF17P	GaCYP71BF17P	507	FSSGRRIC	435	KETLRLYP	366	1	i17-39o
Ga12G0968	Chr12	9985792	9987557	-	CYP71BF13	GaCYP71BF13	542	FSSGRRTC	476	KETLRLHP	400	1	i37-59o
Ga12G0969	Chr12	10016889	10018604	+	CYP71AN55	GaCYP71AN55	539	FGFGRRGC	466	KETLRLHP	390	2	o36-58,i244-266o
Ga12G0970	Chr12	10025294	10027002	+	CYP71AN70P	GaCYP71AN70P	484	FGFGRRGR	411	KETLRLHP	335	2	o36-58,i216-238o
Ga12G1008	Chr12	10694310	10698266	-	CYP75B105_A	GaCYP75B105_A	510	FGAGRRIC	440	KETFRLHP	360	1	i2-21o
Ga12G1196	Chr12	14821173	14823438	-	CYP704B42	GaCYP704B42	534	FQAGPRIC	473	TETLRLYP	396	1	i7-29o
Ga12G1236	Chr12	15389270	15390928	+	CYP78A200	GaCYP78A200	519	FGSGRRVC	456	KETLRVHP	379	2	o20-42,i49-71o
Ga12G1402	Chr12	19493460	19498483	-	CYP71AS19	GaCYP71AS19	514	FGGGRRGC	441	KETLRLHP	365	2	o5-24,i301-323o
Ga12G1444	Chr12	20813468	20815838	-	CYP51G1	GaCYP51G1	486	FGGGRHGC	422	KEALRLHP	341	1	i7-29o
Ga12G1480	Chr12	22396627	22399070	-	CYP72A507_A	GaCYP72A507	514	FGWGPRIC	451	LEVMRLYP	376	1	i7-25o
Ga12G1777	Chr12	28465476	28468846	-	CYP78A199	GaCYP78A199	542	FGSGRRTC	468	KEVLRLHP	387	1	i26-48o
Ga12G1793	Chr12	28913982	28915974	+	CYP703A26	GaCYP703A26	524	FSAGKRKC	453	RETFRMHP	373	2	o4-21,i217-236o
Ga12G1934	Chr12	32305346	32307235	+	CYP714E37	GaCYP714E37	508	FGIGARIC	449	LETLRLYP	373	0	o
Ga12G2052	Chr12	45319446	45321005	-	CYP77A40	GaCYP77A40	519	FGAGRRIC	453	NEVLRKHP	374	1	i13-35o
Ga12G2223	Chr12	73920502	73922829	+	CYP81BA2	GaCYP81BA2	504	FGLGRRAC	434	SETLRLYP	359	0	o
Ga12G2447	Chr12	92254070	92256393	-	CYP722C9	GaCYP722C9	488	FGAGPRTC	425	KETLRMAN	341	1	i12-34o
Ga12G2524	Chr12	93935617	93936971	+	CYP81AT1	GaCYP81AT1	424	FGLGRRAC	355	YETLRLYP	280	0	o
Ga12G2557	Chr12	95242179	95244166	+	CYP735A41	GaCYP735A41	519	FAAGPRNC	458	NESLRLYP	385	1	i5-27o
Ga13G0011	Chr13	87223	102909	+	CYP98A95	GaCYP98A95	1211	FGAGRRVC	432	KEALRLHP	356	1	i2-24o
Ga13G0130	Chr13	1346871	1350325	-	CYP88A80	GaCYP88A80	495	FGAGSRLC	429	DETLRLVT	358	0	o
Ga13G0190	Chr13	1836755	1841054	+	CYP714E79	GaCYP714E79	513	FGAGPHTC	454	NESLRLYS	378	1	i7-29o
Ga13G0251	Chr13	2532072	2536382	-	CYP736A345P	GaCYP736A345P	465	FGSGRRRC	410	KESLRLHP	333	1	i2-24o
Ga13G0260	Chr13	2675484	2680863	-	CYP736A197	GaCYP736A197	511	FGSGRRGC	444	KESLRLHP	367	1	i5-27o
Ga13G0262	Chr13	2711733	2714380	-	CYP736A198	GaCYP736A198	489	FGSGRRGC	422	KESLRLHP	345	1	i2-24o
Ga13G0355	Chr13	3957633	3959545	+	CYP749A200	GaCYP749A200	529	FGLGPRSC	466	NETLRLYP	389	1	i20-42o
Ga13G0358	Chr13	4053791	4067143	+	CYP749A236	GaCYP749A236	519	FGLGPRSC	456	NETLRLYP	379	1	i7-28o
Ga13G0360	Chr13	4076312	4078220	+	CYP749A202	GaCYP749A202	529	FGLGPRSC	466	YETLRLYP	389	1	i20-42o
Ga13G0361	Chr13	4104995	4106902	+	CYP749A237	GaCYP749A237	529	FGLGPRSC	466	NETLRLYP	389	1	i20-42o
Ga13G0362	Chr13	4136232	4138101	+	CYP749A203	GaCYP749A203	519	FGLGPRSC	456	NETLRLYP	379	1	i7-28o
Ga13G0381	Chr13	4456505	4459345	-	CYP707A268	GaCYP707A268	476	FGNGVHAC	413	GETLQLYS	49	1	i5-24o
Ga13G0640	Chr13	9495656	9498152	+	CYP84A80	GaCYP84A80	544	FGSGRRSC	456	KETLRLHP	380	1	i12-34o
Ga13G0708	Chr13	10916923	10919719	+	CYP86B33	GaCYP86B33	468	FNGGPRLC	427	SEALRLYP	350	1	i27-49o
Ga13G0725	Chr13	11315306	11317755	+	CYP749A76a	GaCYP749A76a	513	FGLGPRTC	453	NETLRLYP	376	1	i7-29o
Ga13G0726	Chr13	11324663	11327192	+	CYP749A76b	GaCYP749A76b	513	FGMGHRSC	453	NETLRLYP	376	1	i7-29o
Ga13G0729	Chr13	11392581	11395027	+	CYP749A76c	GaCYP749A76c	501	FGLGPRTC	441	NETLRLYP	364	1	i7-29o
Ga13G0732	Chr13	11608682	11610701	+	CYP749A234	GaCYP749A234	480	FGLEPRSC	420	NETLRLYP	343	1	i7-29o
Ga13G0932	Chr13	25800062	25801557	+	CYP96Z1	GaCYP96Z1	486	FSAGPRIC	425	SETLRLFP	347	1	i5-27o
Ga13G1003	Chr13	30375612	30377252	+	CYP78A202	GaCYP78A202	518	FGSGRRVC	455	KETLRVHP	378	2	o20-42,i49-71o
Ga13G1007	Chr13	30842354	30844634	+	CYP85A42	GaCYP85A42	466	FGGGSRLC	407	FETSRLAT	335	1	i2-24o
Ga13G1023	Chr13	36335909	36347551	+	CYP749A77bP	GaCYP749A77bP	541	FGLGPRSC	469	NETLRLYP	392	2	o10-32,i101-120o
Ga13G1025	Chr13	37745614	37753348	+	CYP749A77a	GaCYP749A77a	535	FGLGPRSC	463	NETLRLYP	386	1	i7-24o
Ga13G1188	Chr13	63100398	63102814	+	CYP749A75	GaCYP749A75	519	FGFGPRTC	453	NEALRLYP	376	1	i7-29o
Ga13G1229	Chr13	68758174	68759727	+	CYP89A157	GaCYP89A157	517	FGVGRRIC	454	LEGLRRHP	371	1	i5-27o
Ga13G1478	Chr13	93158357	93159991	+	CYP716E46	GaCYP716E46	473	EGNGPRMC	413	CEVMRLAP	354	1	i7-28o
Ga13G1492	Chr13	94870473	94872115	+	CYP716E47	GaCYP716E47	487	FGGGPRMC	427	SEVMRLAP	356	1	i12-34o
Ga13G1514	Chr13	96662194	96664502	+	CYP93B35	GaCYP93B35	532	FGTGRRGC	449	KESFRLHP	364	1	i7-29o
Ga13G1541	Chr13	99195444	99209404	-	CYP93B86P	GaCYP93B86P	474	FGTGRRGC	400	KESFRLHP	344	1	i7-29o
Ga13G1547	Chr13	99575449	99576993	+	CYP71BE76	GaCYP71BE76	485	FGAGKRKC	414	KETLRLHP	338	0	o
Ga13G1672	Chr13	103946940	103948560	+	CYP71BE77	GaCYP71BE77	512	FGAGRRIC	435	KETLRLHP	359	1	i5-22o
Ga13G1942	Chr13	110943153	110948837	-	CYP97A50	GaCYP97A50	589	FGGGPRKC	491	NESLRLYP	414	0	o
Ga13G1948	Chr13	111105275	111106888	+	CYP71BE178	GaCYP71BE178	503	FGAGRRMC	437	KETLRLHP	361	0	o
Ga13G1949	Chr13	111140530	111142232	+	CYP71BE80	GaCYP71BE80	486	FGAGRRIC	413	KETMRLHP	337	1	o10-32i
Ga13G2469	Chr13	119996162	119997782	+	CYP71AN73	GaCYP71AN73	510	FGFGRRAC	445	KETLRLHP	368	2	o10-32,i218-237o
Ga13G2841	Chr13	123822672	123824838	+	CYP73A25	GaCYP73A25	505	FGVGRRSC	440	KETLRLRM	362	0	o
Ga14G0173	tig00000498	1024863	1031170	-	CYP96K6	GaCYP96K6	412	FLAGPRIC	358	CETLRLHP	279	0	o
Ga14G1622	tig00015610	190043	191682	+	CYP82C59	GaCYP82C59	520	FGSGRRIC	452	KETLRIKP	374	2	o10-29,i223-245o
Ga14G1688	tig00015726	175548	177364	+	CYP79D66	GaCYP79D66	545	FGRGRRGC	465	REAFRLHP	384	1	i2-24o
Ga14G1722	tig00015727	299221	303447	+	CYP749A73b	GaCYP749A73b	513	FSMGPRSC	454	NETLRLYS	377	1	i7-29o
Ga14G1723	tig00015727	305381	309553	+	CYP749A73a	GaCYP749A73a	488	FSMGPRSC	429	NETLRLYS	352	1	i7-29o
Ga14G1724	tig00015727	311354	313398	+	CYP749A235	GaCYP749A235	513	FSMGPRSC	454	NETLRLYS	377	1	i7-29o
Ga14G1953	tig00016850	29013	30923	-	CYP749A205	GaCYP749A205	529	FGLGPRSC	466	NETLRLYP	389	1	i20-42o
Ga14G2109	tig00018109	675941	677526	-	CYP83F66	GaCYP83F66	497	FGAGRRIC	431	KETFRLQP	355	1	i2-21o
Ga14G2111	tig00018109	729347	730932	-	CYP83F51	GaCYP83F51	418	FGAGRRAC	352	KETFRLQP	276	0	o
Ga14G2113	tig00018109	766194	767778	-	CYP83F50	GaCYP83F50	497	FGAGRRVC	431	RETFRLQP	355	2	o4-21,i292-314o
Ga14G2330	tig00019866	270972	272051	+	CYP73A286	GaCYP73A286	359	FGVGRRSC	294	KETLRLHT	212	0	o
Ga14G2735	tig00024743	21013	22587	+	CYP86C17	GaCYP86C17	524	FNAGPRLC	460	SESLRLYP	383	1	i20-39o
Probable pseudogene

## Sheet: Dataset S4
Supplementary Dataset 1 – Identification and characterization of CYP450 in Gossypium hirsutum genome with haeme binding and ERR triad motif position.
GeneID	Chr	Start	End	Strand	%ID	CYP name	CYP_renaming	Protein length	Haeme Binding Motif	Motif Pos	ERR Triad Motif	ERR Triad Pos	TM helices	Topology
Gh_A01G040600.1	A01	4166512	4168578	+	95.37	CYP72A502_A	GhCYP72A502_A	518	GPRICI	459	EVLRLYPP	381	1	i5-27o
Gh_A01G040700.1	A01	4172459	4174343	+	100	CYP72A503_A	GhCYP72A503_A	518	GPRICI	459	EVLRLYPP	381	1	i13-32o
Gh_A01G040800.1	A01	4192559	4194643	+	99.81	CYP72A504_A	GhCYP72A504_A	518	GPRICI	459	EVLRLYPS	381	1	i13-32o
Gh_A01G040900.1	A01	4200250	4202485	+	100	CYP72A848_A	GhCYP72A848_A	518	GPRICI	459	EVLRLYPP	381	1	i5-27o
Gh_A01G055300.1	A01	6757058	6767260	-	95.02	CYP87B29_A	GhCYP87B29_A	463	GNRPCT	425	ETLRLENL	349	2	o4-23,i277-299o
Gh_A01G064900.1	A01	8115380	8117882	-	99.41	CYP736A332_A	GhCYP736A332_A	507	GRRGCP	443	ESFRLHPV	364	1	i7-24o
Gh_A01G065000.1	A01	8125484	8125798	-	97.12	CYP736A337P_A	GhCYP736A337P_A	104	GRRGCP	40	EKFGLTLP	82	0	o
Gh_A01G065100.1	A01	8126249	8127299	-	95.83	CYP736A341P_A	GhCYP736A341P_A	264	GRKLPP	44	ETINLSQA	182	1	o15-37i
Gh_A01G080400.1	A01	11613996	11615725	-	100	CYP728B54_A	GhCYP728B54_A	474	GPRICP	416	ETLRMFPP	342	0	o
Gh_A01G089700.1	A01	12999258	13000990	-	99.61	CYP71BE64_A	GhCYP71BE64_A	511	GRRICP	444	ETLRLHNP	367	1	i5-27o
Gh_A01G089800.1	A01	13032133	13033963	-	100	CYP71BE165P_A	GhCYP71BE165P_A	287	GRRICP	219	ETLRLHPP	142	0	o
Gh_A01G090000.1	A01	13062326	13064069	-	100	CYP71BE65_A	GhCYP71BE65_A	507	GRRMCP	440	ETLRLHPP	362	1	i7-24o
Gh_A01G090300.1	A01	13158700	13160332	-	100	CYP71BE66_A	GhCYP71BE66_A	502	GRRMCP	436	ETLRLHPP	358	1	i5-22o
Gh_A01G090400.1	A01	13344093	13346079	-	100	CYP71BE67_A	GhCYP71BE67_A	530	GRRICP	438	ETLRLHPP	360	1	i5-22o
Gh_A01G090600.1	A01	13545139	13546189	-	77.24	CYP71BE166P_A	GhCYP71BE166P_A	242	GRRICP	180	ETLRLHPP	102	0	o
Gh_A01G090700.1	A01	13615878	13616954	-	100	CYP71BE68_A	GhCYP71BE68_A	331	GGRICP	263	ETLRLHPP	185	0	o
Gh_A01G090800.1	A01	13700908	13708654	-	100	CYP71BE167P_A	GhCYP71BE167P_A	321	GEMLCN	176	ETPKNLPP	32	1	i7-26o
Gh_A01G090900.1	A01	13708977	13710965	-	77.39	CYP71BE169P_A	GhCYP71BE169P_A	345	LRKVCT	87	ETLRLHPP	252	0	o
Gh_A01G121600.1	A01	25787886	25788299	+	95.62	CYP721A90_A-fragment1	GhCYP721A90_A-fragment1	137	GPRFCV	79	ETLRLYPP	5	0	o
Gh_A01G122600.1	A01	26061347	26062991	+	100	CYP82D144_A	GhCYP82D144_A	520	GRRMCP	456	ETLRLYPA	376	1	i7-26o
Gh_A01G182700.1	A01	100368342	100371347	-	93.51	CYP78A191_A	GhCYP78A191_A	509	GRRVCP	445	EVLRMHPP	366	2	o4-22,i29-51o
Gh_A01G219700.1	A01	110897355	110899517	-	100	CYP93A87_A	GhCYP93A87_A	505	GRRSCP	442	ETLRLHPA	362	1	i7-26o
Gh_A01G219800.1	A01	110933548	110935171	-	100	CYP93A88_A	GhCYP93A88_A	515	GRRSCP	449	ETLRLHPS	363	1	i7-26o
Gh_A01G219900.1	A01	110970630	110972714	+	99.81	CYP712A11_A	GhCYP712A11_A	515	GRRGCP	453	ETLRLHPS	368	1	i12-29o
Gh_A01G222100.1	A01	111298409	111300314	+	99.8	CYP98A94_A	GhCYP98A94_A	508	GRRVCP	434	EALRLHPP	356	0	o
Gh_A01G233700.1	A01	113235554	113237023	+	91	CYP94C88_A	GhCYP94C88_A	463	GFRVCL	399	ESMRLYLP	319	1	i7-24o
Gh_A02G005200.1	A02	339428	340994	+	95.56	CYP71BE69_A	GhCYP71BE69_A	485	GRRICP	419	ESIRLHPA	342	0	o
Gh_A02G025000.1	A02	2426745	2429401	-	100	CYP749A64_A	GhCYP749A64_A	496	GLRSCV	433	ETLRLYGP	354	0	o
Gh_A02G027600.1	A02	2788698	2792360	+	91.73	CYP749A217P_A	GhCYP749A217P_A	273	GPRFCI	244	ETLRLYGA	165	0	o
Gh_A02G027700.1	A02	2796023	2802905	+	100	CYP749A208_A	GhCYP749A208_A	512	GPRFCV	452	ETLRLYGP	373	1	i3-25o
Gh_A02G027800.1	A02	2804554	2806489	+	99.8	CYP749A209_A	GhCYP749A209_A	512	GPRFCV	452	ETLRLYGP	373	1	i3-25o
Gh_A02G027900.1	A02	2808826	2810850	+	98.84	CYP749A195_A	GhCYP749A195_A	516	GPRSCV	456	ETLRLYGP	377	1	i7-29o
Gh_A02G028000.1	A02	2832604	2833872	+	99.71	CYP749A218P_A	GhCYP749A218P_A	349	GPRSCV	289	ETLRLYGP	210	0	o
Gh_A02G028100.1	A02	2840142	2843075	+	100	CYP749A206_A	GhCYP749A206_A	511	GPRSCV	451	ETLRLYGP	372	1	i3-25o
Gh_A02G028200.1	A02	2855823	2863212	+	90.29	CYP749A219_A	GhCYP749A219_A	498	GPRSCV	438	ETLRLYGP	359	1	i3-25o
Gh_A02G028300.1	A02	2867631	2870076	+	100	CYP749A66_A	GhCYP749A66_A	516	GPRSCV	456	ETLRLYGP	377	1	i7-29o
Gh_A02G028500.1	A02	2906010	2908716	+	100	CYP749A67_A	GhCYP749A67_A	581	GPRSCV	521	ETLRLYGP	442	0	o
Gh_A02G028600.1	A02	2914331	2916761	+	100	CYP749A68_A	GhCYP749A68_A	518	GPRSCV	459	ETLRLYGP	380	1	i11-33o
Gh_A02G028800.1	A02	2932496	2932936	+	100	CYP749A69_A	GhCYP749A69_A	146	GPRSCV	86	ETSRLYGP	7	0	o
Gh_A02G029100.1	A02	2956428	2956868	+	95.21	CYP749A220P_A	GhCYP749A220P_A	146	GPRTCV	86	ESLRLYGP	7	0	o
Gh_A02G029200.1	A02	2960810	2967819	+	91.28	CYP749A221_A	GhCYP749A221_A	488	GPRTCV	428	ETLRLYGP	349	1	i7-29o
Gh_A02G029300.1	A02	2969796	2970236	+	98.63	CYP736A349P_A	GhCYP736A349P_A	146	GPRTCV	86	EPLRLYGP	7	0	o
Gh_A02G029400.1	A02	2994758	2997004	+	99.81	CYP749A197_A	GhCYP749A197_A	516	GPRTCV	456	ETLRLYSS	377	1	i7-29o
Gh_A02G029500.1	A02	2999892	3007494	+	96.71	CYP749A193_A	GhCYP749A193_A	512	GPRNCV	452	ETLRLYGP	373	1	i7-29o
Gh_A02G029700.1	A02	3024658	3026689	+	100	CYP749A70_A	GhCYP749A70_A	517	GPRNCV	457	ETLRLYGP	378	1	i7-29o
Gh_A02G076200.1	A02	11048408	11060215	+	99.79	CYP733A1_A	GhCYP733A1_A	739	GPRMCP	422	ETLRRATI	350	1	i5-27o
Gh_A02G098600.1	A02	21161851	21163468	-	99.8	CYP81B88_A	GhCYP81B88_A	508	GRRGCP	440	ETFRMCPP	364	1	i5-24o
Gh_A02G098900.1	A02	21259154	21261763	+	95.12	CYP81BQ6_A	GhCYP81BQ6_A	507	GRRACP	438	ETLRLYPA	361	1	i2-24o
Gh_A02G116300.1	A02	43605936	43608540	-	100	CYP78A194_A	GhCYP78A194_A	530	GRRACP	469	EVLRLHPP	384	1	i26-48o
Gh_A02G141100.1	A02	79864701	79866239	+	100	CYP89A152_A	GhCYP89A152_A	512	GRRICP	449	EGLRRHPP	368	1	i5-27o
Gh_A02G164200.1	A02	97394815	97396770	-	100	CYP78A193_A	GhCYP78A193_A	537	GRRVCP	472	ETLRIHPP	392	1	i29-51o
Gh_A02G184900.1	A02	103044389	103047829	+	99.61	CYP81BA1_A	GhCYP81BA1_A	507	GRRACP	442	ETLRLYPA	365	0	o
Gh_A02G187700.1	A02	103413069	103414653	+	100	CYP83F50_A	GhCYP83F50_A	497	GRRVCP	434	ETFRLQPI	356	2	o4-21,i292-314o
Gh_A02G187900.1	A02	103465597	103472191	+	95.67	CYP83F51_A	GhCYP83F51_A	486	GRRACP	423	ETFRLQPI	345	1	i2-21o
Gh_A02G188000.1	A02	103502184	103503511	+	91.79	CYP83F66_A	GhCYP83F66_A	411	GNSNCL	24	ETFRLQPV	356	1	i2-21o
Gh_A02G199700.1	A02	104900021	104906371	+	100	CYP90C25_A	GhCYP90C25_A	514	GQRLCP	457	ETLRMANI	382	1	i17-34o
Gh_A03G020300.1	A03	2626882	2628872	-	100	CYP706B1_A	GhCYP706B1_A	536	GRRMCA	469	ETFRLHPP	389	1	i21-43o
Gh_A03G020400.1	A03	2668997	2670853	+	99.62	CYP706B2_A	GhCYP706B2_A	527	GRRKCP	458	ETFRLHPV	378	1	i21-43o
Gh_A03G020500.1	A03	2701666	2702402	-	100	CYP706B28P_A	GhCYP706B28P_A	218	GRRRCP	151	ETFRLHPP	71	0	o
Gh_A03G020700.1	A03	2713734	2721732	-	99	CYP706B26_A	GhCYP706B26_A	430	GNKLCV	95	ETFRLHPA	377	1	i21-43o
Gh_A03G020800.1	A03	2723290	2724959	-	100	CYP706B22_A	GhCYP706B22_A	515	GRRRCP	448	ETFRLHPP	368	0	o
Gh_A03G024200.1	A03	3170579	3172773	+	98.52	CYP87A54_A	GhCYP87A54_A	474	GLRFCV	416	ETLQFFSP	43	1	i2-21o
Gh_A03G024300.1	A03	3212681	3214629	+	96.7	CYP87A94_A	GhCYP87A94_A	378	ERRAMP	226	ETVRLANI	329	1	i2-19o
Gh_A03G024400.1	A03	3222233	3224409	+	97	CYP87A56_A	GhCYP87A56_A	411	GMRFCV	353	ETLQFFSR	42	1	i2-21o
Gh_A03G057900.1	A03	8956049	8958939	-	99.6	CYP707A144_A	GhCYP707A144_A	500	GVHSCP	443	ETLKLYKE	77	1	o30-52i
Gh_A03G062500.1	A03	9972782	9992709	-	83.03	CYP87B31_A	GhCYP87B31_A	525	KDRLCM	489	ETLRLGNF	319	2	o5-24,i257-279o
Gh_A03G064400.1	A03	10670602	10672137	+	100	CYP86A128_A	GhCYP86A128_A	511	GPRTCL	452	ETLRLYPS	370	1	i7-24o
Gh_A03G068000.1	A03	12107754	12109286	+	100	CYP94B68_A	GhCYP94B68_A	510	GPRVCL	451	ESMRLYPP	367	1	i5-22o
Gh_A03G093900.1	A03	23276183	23277885	-	92.44	CYP71AN68_A	GhCYP71AN68_A	503	GRRRCP	439	ETLRLHAP	376	0	o
Gh_A03G094200.1	A03	23328601	23330202	+	93.7	CYP71AP34_A	GhCYP71AP34_A	491	GRRSCP	428	ETWRLHPP	350	0	o
Gh_A03G124300.1	A03	65192542	65198818	+	90.42	CYP78A192_A	GhCYP78A192_A	553	GRRVCP	493	ETLRVHPP	414	2	o20-42,i49-71o
Gh_A03G155300.1	A03	92193303	92194877	+	99.43	CYP86C17_A	GhCYP86C17_A	524	GPMLCL	463	ESLRLYPS	384	1	i20-39o
Gh_A03G179100.1	A03	101277937	101280654	+	100	CYP51G32_A	GhCYP51G32_A	486	GRHGCL	425	EALRLHPP	342	1	i7-29o
Gh_A03G217800.1	A03	107655090	107659614	+	99.79	CYP707A138_A	GhCYP707A138_A	474	GVHACP	413	ETLQLYSQ	47	1	i3-21o
Gh_A04G021100.1	A04	2827120	2828771	+	98.76	CYP706Q7_A	GhCYP706Q7_A	388	GRRMCV	322	DLSRIYGP	80	0	o
Gh_A04G021200.1	A04	2866646	2868015	+	100	CYP706Q5_A	GhCYP706Q5_A	404	GRRMCV	338	DPLRFQPE	309	0	o
Gh_A04G021700.1	A04	2952580	2954254	+	99.81	CYP706Q1_A	GhCYP706Q1_A	531	GRRMCV	456	ETLRLHPV	378	1	i25-44o
Gh_A04G055900.1	A04	11694328	11695397	-	91.69	CYP71BE170P_A	GhCYP71BE170P_A	325	GRRKCP	257	ETLRLYPI	179	0	o
Gh_A04G056000.1	A04	11755068	11756683	-	99.02	CYP71BE70_A	GhCYP71BE70_A	508	GRRICP	440	ETLRLHPV	362	1	i7-25o
Gh_A04G056200.1	A04	11788658	11790569	-	99.8	CYP71BE71_A	GhCYP71BE71_A	508	GRRVCP	440	ETLRLHPV	362	1	i7-26o
Gh_A04G077000.1	A04	46732274	46733776	-	100	CYP94C83_A	GhCYP94C83_A	500	GFRVCL	441	ESMRLYPP	361	1	i13-35o
Gh_A04G084800.1	A04	57981941	57984271	-	97	CYP76A49_ A	GhCYP76A49_ A	548	GRRMCA	482	ETFRLHPP	404	2	o4-23,i43-60o
Gh_A04G084900.1	A04	58037154	58038460	-	95.71	CYP76A126_A	GhCYP76A126_A	396	IRRKCI	97	ETFRLHPP	315	0	o
Gh_A04G129000.1	A04	79417222	79419468	-	100	CYP86B32_A	GhCYP86B32_A	547	GPRLCL	478	EALRLYPS	399	1	i23-45o
Gh_A04G139200.1	A04	81164585	81166448	+	100	CYP82C59a_A	GhCYP82C59a_A	520	GRRICP	455	ETLRIKPP	375	2	o10-29,i223-245o
Gh_A04G139400.1	A04	81177100	81178963	+	100	CYP82C59b_A	GhCYP82C59b_A	520	GRRICP	455	ETLRIKPP	375	2	o10-29,i223-245o
Gh_A04G163200.1	A04	83805657	83809072	+	100	CYP78A190_A	GhCYP78A190_A	559	GRRVCP	492	EVLRLHPP	413	2	o28-45,i52-74o
Gh_A04G170000.1	A04	84370864	84375055	-	100	CYP749A73a_A	GhCYP749A73a_A	513	GPRSCV	457	ETLRLYSP	378	1	i7-29o
Gh_A04G170100.1	A04	84376994	84386455	-	96.49	CYP749A73b_A	GhCYP749A73b_A	513	GPRSCV	457	ETLRLYSP	378	1	i7-29o
Gh_A05G014900.1	A05	1919507	1922329	-	87.98	CYP734A56_A	GhCYP734A56_A	477	GVRTCI	410	ESLRLYPP	332	1	i7-29o
Gh_A05G025800.1	A05	3320385	3322281	+	87.9	CYP72D17_A	GhCYP72D17_A	510	GPRTCI	464	EVLRLYPP	386	1	i7-29o
Gh_A05G032300.1	A05	4003397	4005823	-	93.15	CYP711A55_A	GhCYP711A55_A	520	GPRACV	461	EAMRFYIV	382	1	i20-42o
Gh_A05G054100.1	A05	6360375	6362554	-	100	CYP76AG4_A	GhCYP76AG4_A	527	GRRSCV	461	EVFRLHPG	383	1	o15-37i
Gh_A05G069900.1	A05	7834595	7836109	-	100	CYP94C84_A	GhCYP94C84_A	504	GQRVCL	443	ESLRLFPP	364	1	i13-35o
Gh_A05G076200.1	A05	8425536	8427071	-	100	CYP86A129_A	GhCYP86A129_A	511	GPRTCL	452	ETLRLYPS	370	1	i7-24o
Gh_A05G084300.1	A05	9018054	9019973	-	91.56	CYP714F8_A	GhCYP714F8_A	388	GARVCP	332	EVLRLYPA	254	1	i7-29o
Gh_A05G096100.1	A05	10152975	10155558	+	100	CYP79D64_A	GhCYP79D64_A	550	GMRGCK	479	EAFRLHPI	398	1	i21-43o
Gh_A05G102300.1	A05	10824248	10826655	-	100	CYP716A120_A	GhCYP716A120_A	476	GPRMCP	421	EVMRLAPP	348	1	o4-23i
Gh_A05G171300.1	A05	18311383	18311853	+	92	CYP83F69P_A	GhCYP83F69P_A	156	GRRICP	119	ETFRLQPT	41	0	o
Gh_A05G178900.1	A05	19124014	19126156	+	100	CYP721A94_A	GhCYP721A94_A	505	GSRICV	447	ETLRLYSP	373	1	i7-29o
Gh_A05G181400.1	A05	19316439	19317232	-	100	CYP82D326P_A	GhCYP82D326P_A	235	GRRMCP	167	ETMRLYPA	87	0	o
Gh_A05G181500.1	A05	19317384	19318106	-	100	CYP82D325P_A	GhCYP82D325P_A	240	GKRIPS	208	ETIKECLT	95	1	o6-28i
Gh_A05G181600.1	A05	19348615	19350576	-	100	CYP82D113_A	GhCYP82D113_A	447	GRRSCP	382	ETLRMYPP	302	0	o
Gh_A05G181800.1	A05	19359685	19371697	-	94.27	CYP82D112_A	GhCYP82D112_A	518	GRRSCP	457	ETLRLYPP	377	1	i7-24o
Gh_A05G182000.1	A05	19437516	19439234	+	91.55	CYP82D111_A	GhCYP82D111_A	492	GRRNCP	415	ETFRMYPP	335	1	i7-24o
Gh_A05G182400.1	A05	19620761	19632351	+	100	CYP701A52_A	GhCYP701A52_A	514	GKRACA	456	ETLRKHSP	379	1	i13-32o
Gh_A05G186300.1	A05	20042095	20048378	-	94.33	CYP707A139_A	GhCYP707A139_A	449	GVHACP	391	ETLQLYSR	48	1	o4-21i
Gh_A05G191100.1	A05	20540349	20542806	-	100	CYP81T4_A	GhCYP81T4_A	518	GRRACP	450	ETMRLFPP	375	1	i7-26o
Gh_A05G191200.1	A05	20543011	20543346	-	67.86	CYP81BQ15P_A	GhCYP81BQ15P_A	111	GRRACP	43	EALCSPRP	95	1	i46-68o
Gh_A05G191700.1	A05	20579754	20581457	+	100	CYP81B90_A	GhCYP81B90_A	542	GRRRCP	474	ETFRMCPV	398	1	i35-54o
Gh_A05G246400.1	A05	28635780	28637617	+	99.81	CYP74A1_A	GhCYP74A1_A	523	GNKQCA	472	EALRIEPP	385	0	o
Gh_A05G249000.1	A05	29118195	29119781	-	94.39	CYP81B89b_A	GhCYP81B89b_A	484	GRQRCP	416	ETFRIKPT	340	0	o
Gh_A05G249100.1	A05	29134099	29137261	-	97.41	CYP81B89a_A	GhCYP81B89a_A	516	GRRRCP	448	ETFRIKPT	372	1	i7-29o
Gh_A05G266600.1	A05	32472650	32481449	-	98.18	CYP79A179_A	GhCYP79A179_A	539	GRRGCM	471	EAFRIHPI	389	1	i21-43o
Gh_A05G282800.1	A05	37378184	37379311	-	91.18	CYP736A342_A-partial	GhCYP736A342_A-partial	340	GRRLCP	278	ETLRLHPI	199	0	o
Gh_A05G282900.1	A05	37379439	37379783	-	92.39	CYP736A343P_A	GhCYP736A343P_A	114	GPRPLP	40	MSIRLGSV	72	1	o5-27i
Gh_A05G283000.1	A05	37486563	37491208	-	96.92	CYP736A191_A	GhCYP736A191_A	501	GRRLCP	434	ETLRLHPI	355	1	i2-24o
Gh_A05G304700.1	A05	48484691	48486354	-	100	CYP82D109_A	GhCYP82D109_A	522	GRRSCP	457	ETLRMYPP	377	1	i7-24o
Gh_A05G340500.1	A05	83216783	83218309	+	100	CYP94B69_A	GhCYP94B69_A	508	GPRICL	448	ESMRLYPP	364	1	i7-29o
Gh_A05G359600.1	A05	96935243	96937926	+	99.54	CYP724A1_A	GhCYP724A1_A	475	GPRLCP	412	ETLGFLKP	45	1	i2-24o
Gh_A05G385400.1	A05	103023161	103024772	+	100	CYP718A21_A	GhCYP718A21_A	484	GPRTCA	423	ECMRLFPP	351	1	i7-25o
Gh_A05G402400.1	A05	106210175	106212106	+	100	CYP714E35_A	GhCYP714E35_A	513	NYRHCP	489	ETLRLYPP	379	1	i5-27o
Gh_A05G404100.1	A05	106514605	106516137	+	100	CYP96K3_A	GhCYP96K3_A	510	GPRICP	452	ETLRLYPP	372	1	i5-23o
Gh_A05G404400.1	A05	106549672	106551207	-	100	CYP96K5_A	GhCYP96K5_A	511	GPRICP	453	ETLRLYPP	373	1	i5-27o
Gh_A05G411700.1	A05	107954874	107957983	-	99.81	CYP714A30_A	GhCYP714A30_A	519	GSRLCL	463	EALRLYPP	385	1	i7-29o
Gh_A06G007600.1	A06	661148	666998	+	100	CYP722A1_A	GhCYP722A1_A	498	GARTCL	438	ESLRMASV	364	1	i5-27o
Gh_A06G013000.1	A06	1096005	1097492	+	99.8	CYP74A60_A	GhCYP74A60_A	495	GYRILS	127	EAFRIEPP	357	0	o
Gh_A06G013600.1	A06	1239259	1241257	-	98.08	CYP82D148_A	GhCYP82D148_A	519	GRRMCP	451	ETLRLYPA	371	1	o10-32i
Gh_A06G013700.1	A06	1247925	1250123	-	100	CYP82D149_A	GhCYP82D149_A	525	GRRMCP	457	ETLRLHPP	377	1	i7-29o
Gh_A06G013800.1	A06	1253715	1256085	-	100	CYP82D150_A	GhCYP82D150_A	526	GRRMCP	458	ETLRLYPP	378	1	i7-29o
Gh_A06G014000.1	A06	1286071	1286580	-	100	CYP82D327P_A	GhCYP82D327P_A	169	GGPQPP	57	ECLTINDK	97	1	o10-29i
Gh_A06G014300.1	A06	1345348	1347262	-	100	CYP82D220_A	GhCYP82D220_A	525	GRRMCP	457	ETLRLYPP	377	1	i7-29o
Gh_A06G014400.1	A06	1353632	1355313	-	97.88	CYP82D151_A	GhCYP82D151_A	509	GKRMCP	441	ETLRLYPA	361	1	i7-29o
Gh_A06G014500.1	A06	1358195	1359635	-	89.64	CYP82D330_A-partial	GhCYP82D330_A-partial	338	GRRMCP	270	ETLHLYPP	190	0	o
Gh_A06G014600.1	A06	1359687	1360196	-	87.57	CYP82D329P_A	GhCYP82D329P_A	169	GGSQPP	57	WRQIRKVA	134	1	o10-29i
Gh_A06G014700.1	A06	1367257	1368912	-	100	CYP82D110_A	GhCYP82D110_A	520	GRRSCP	455	ETLRMYPP	375	1	i7-24o
Gh_A06G015200.1	A06	1431686	1435243	+	96.89	CYP701A18_A	GhCYP701A18_A	480	GKRACA	422	ETLRKHSP	345	0	o
Gh_A06G023700.1	A06	2373836	2375418	-	63.07	CYP81B177_A	GhCYP81B177_A	484	GFRIPS	380	ETLRMYPP	356	0	o
Gh_A06G065400.1	A06	11075815	11078382	-	100	CYP734A57_A	GhCYP734A57_A	515	GVRTCI	456	ESLRLYPP	378	1	i7-29o
Gh_A06G086400.1	A06	20325707	20327927	-	100	CYP92A133_A	GhCYP92A133_A	517	GRRMCP	448	ETMRKHPV	370	0	o
Gh_A06G131300.1	A06	67717390	67719103	+	100	CYP78A195_A	GhCYP78A195_A	544	GRRVCP	476	ETLRLHPP	392	1	i29-51o
Gh_A06G173500.1	A06	114274715	114276232	+	100	CYP77B26_A	GhCYP77B26_A	505	GRRICP	447	ETLRRHPP	365	0	o
Gh_A06G185200.1	A06	117012742	117016257	-	89.96	CYP88A77_A	GhCYP88A77_A	472	GSRLCP	412	ETLRLITF	339	1	i7-26o
Gh_A06G191800.1	A06	118763133	118767417	-	100	CYP90A46_A	GhCYP90A46_A	472	GPRLCP	417	ETLQLISA	43	1	i2-24o
Gh_A06G206600.1	A06	121948911	121952697	-	100	CYP727B4_A	GhCYP727B4_A	559	GARACV	498	ESARVMPA	389	1	i31-53o
Gh_A06G209700.1	A06	122528986	122532645	-	96.96	CYP728G3_A	GhCYP728G3_A	487	GPRVCA	431	ELMRVNPP	356	1	i20-42o
Gh_A06G236300.1	A06	125678109	125684525	+	91.9	CYP77B27_A	GhCYP77B27_A	489	GRRICP	431	ETFRRHPP	349	0	o
Gh_A07G002300.1	A07	223387	226178	-	100	CYP734A58_A	GhCYP734A58_A	518	GVRTCI	455	ESLRLYPP	377	1	i7-29o
Gh_A07G044300.1	A07	5185923	5188326	+	96	CYP704A127_A	GhCYP704A127_A	524	GPRICL	466	ETLRLYPA	386	3	i2-19,o23-45,i313-335o
Gh_A07G055600.1	A07	6603308	6605726	+	97.07	CYP87B28_A	GhCYP87B28_A	467	GNRTCA	411	ESLRLANV	336	0	o
Gh_A07G060600.1	A07	7298351	7301353	-	90.6	CYP71AH6_A	GhCYP71AH6_A	516	GRRGCP	447	ETLRLHPP	369	1	o30-47i
Gh_A07G085300.1	A07	11750651	11752711	+	100	CYP81AT5_A	GhCYP81AT5_A	501	GRRACP	433	EAQRLYPA	359	1	i7-24o
Gh_A07G085600.1	A07	11860822	11862342	+	94.82	CYP81AT8P_A	GhCYP81AT8P_A	193	GRRACP	125	EAQRLHPA	51	0	o
Gh_A07G087000.1	A07	12137755	12141291	-	99.44	CYP85A1_A	GhCYP85A1_A	384	GTRQCP	330	ETSRLATI	256	0	o
Gh_A07G101600.1	A07	15493347	15495649	+	100	CYP82L33P_A	GhCYP82L33P_A	156	GIFVLP	12	LSLLLNHP	114	0	o
Gh_A07G101700.1	A07	15537788	15540095	+	100	CYP82L32_A	GhCYP82L32_A	463	TCRLAP	442	ETLRLYPP	368	0	o
Gh_A07G108900.1	A07	17361281	17365195	-	96.5	CYP707A143_A	GhCYP707A143_A	413	GVHSCP	356	ETLKFYTQ	8	0	o
Gh_A07G112600.1	A07	18193411	18194955	+	99.81	CYP86A130_A	GhCYP86A130_A	514	GPRTCL	455	ETLRLYPS	373	1	i5-27o
Gh_A07G130000.1	A07	24157117	24158729	+	96.08	CYP75A20b_A	GhCYP75A20b_A	500	GRRICA	433	ETFRKHPS	352	1	i7-26o
Gh_A07G130200.1	A07	24185878	24188547	+	99.22	CYP75A20a_A	GhCYP75A20a_A	510	GRRICA	443	ETFRKHPS	362	1	i7-26o
Gh_A07G175000.1	A07	46222721	46224631	-	100	CYP82J10_A	GhCYP82J10_A	530	GRRSCP	462	ETLRLYPP	382	0	o
Gh_A07G199000.1	A07	81540857	81543480	-	99.36	CYP85A41_A	GhCYP85A41_A	465	GTRQCP	411	ETSRLATI	337	1	i2-24o
Gh_A07G200100.1	A07	82054896	82057084	+	98.06	CYP714E36_A	GhCYP714E36_A	516	GPRVCL	460	ESLRLYPP	382	1	i7-29o
Gh_A07G204600.1	A07	84088498	84095819	-	99.83	CYP97B47_A	GhCYP97B47_A	579	GPRKCV	518	ESLRLYPQ	412	0	o
Gh_A07G215000.1	A07	89144751	89146575	+	89.96	CYP79D120_A	GhCYP79D120_A	530	GRRGCP	457	EAFRLHPI	374	1	i7-29o
Gh_A07G215700.1	A07	89674623	89676439	+	99.63	CYP79D66_A	GhCYP79D66_A	545	GRRGCP	468	EAFRLHPV	385	1	i2-24o
Gh_A07G230700.1	A07	92529677	92531560	+	100	CYP71BE75_A	GhCYP71BE75_A	509	GRRMCP	442	ETMRLHPP	364	1	o4-26i
Gh_A07G235500.1	A07	93156265	93157788	+	99.01	CYP94A72_A	GhCYP94A72_A	507	GPRVCL	445	ECMRLYPP	361	1	i7-24o
Gh_A07G235800.1	A07	93201604	93203127	+	99.01	CYP94A73_A	GhCYP94A73_A	507	GPRVCL	445	ECMRLYPP	361	0	o
Gh_A08G008400.1	A08	689998	691699	+	99.81	CYP94C85_A	GhCYP94C85_A	518	GLRVCL	459	ESLRLFPP	380	1	i28-50o
Gh_A08G013900.1	A08	1131565	1132965	-	93.1	CYP94F9_A	GhCYP94F9_A	466	GHPHCD	336	ESLRLFPP	372	3	o10-32,i311-333,o447-464i
Gh_A08G019400.1	A08	1751774	1756571	+	100	CYP716A119_A	GhCYP716A119_A	480	GPRMCP	423	EVLRLAPP	350	1	i5-24o
Gh_A08G124800.1	A08	80472100	80474044	-	100	CYP78A196_A	GhCYP78A196_A	532	GRRTCP	472	EVLRMHPP	387	1	i26-48o
Gh_A08G144000.1	A08	98516397	98519086	-	99.07	CYP78A197_A	GhCYP78A197_A	537	GRRTCP	471	EVLRLHPP	388	1	i24-46o
Gh_A08G149300.1	A08	101354991	101358039	+	100	CYP704A128_A	GhCYP704A128_A	512	GPRICL	452	ETLRLYPA	373	1	i5-27o
Gh_A08G153000.1	A08	102706086	102707669	-	99.81	CYP86A132_A	GhCYP86A132_A	527	GPRICL	453	ETLRLYPS	372	1	i7-24o
Gh_A08G171800.1	A08	108163712	108166242	-	98.5	CYP707A141_A	GhCYP707A141_A	466	GTHSCP	410	ETFQLYSQ	48	1	o4-26i
Gh_A08G182400.1	A08	110688082	110692686	-	100	CYP88A78_A	GhCYP88A78_A	490	GSKTCP	434	ESLRRNYF	360	1	i5-27o
Gh_A08G182500.1	A08	110718372	110720976	-	100	CYP88A81_A	GhCYP88A81_A	497	GSRICP	441	ITLPLTRP	478	1	i13-35o
Gh_A08G182600.1	A08	110800939	110809980	-	99.79	CYP88A79_A	GhCYP88A79_A	487	GSRICP	431	ETLRRASV	358	1	i2-24o
Gh_A08G197600.1	A08	114376901	114378529	+	94.05	CYP706D9_A	GhCYP706D9_A	494	GRRMCA	428	ETLRLHPS	348	2	o4-23,i162-181o
Gh_A08G200800.1	A08	114915402	114918992	+	100	CYP76F168_A-fragment1	GhCYP76F168_A-fragment1	268	GRRICP	207	ETLRLHPP	129	0	o
Gh_A08G200900.1	A08	114959147	114960722	+	91.08	CYP76F89_A	GhCYP76F89_A	481	GRRICP	420	ETLRLHPP	342	1	i2-21o
Gh_A08G201000.1	A08	114972033	114973768	+	100	CYP76F90_A	GhCYP76F90_A	498	GRRICP	437	ETMRLHPS	359	1	i7-24o
Gh_A08G201100.1	A08	114986008	114987828	+	100	CYP76F91_A	GhCYP76F91_A	500	GRRICP	439	ETMRLHPP	361	1	i7-24o
Gh_A08G201300.1	A08	115037463	115039266	+	90.32	CYP76F159_A	GhCYP76F159_A	449	GRRICP	388	ETLRLHPP	310	0	o
Gh_A08G209000.1	A08	116670743	116672347	-	100	CYP86A131_A	GhCYP86A131_A	534	GPRICL	453	ETLRLYPS	372	0	o
Gh_A08G214900.1	A08	117453029	117454602	+	100	CYP94A74_A	GhCYP94A74_A	506	GPRICL	444	ESMRLYPP	360	1	i2-24o
Gh_A08G252300.1	A08	122230688	122232232	+	100	CYP89A153_A	GhCYP89A153_A	514	GRRICP	453	EGLRRHPP	368	0	o
Gh_A08G268000.1	A08	123788286	123796167	-	92.71	CYP72A506_A	GhCYP72A506_A	484	GPRICI	428	EVLRLYPP	349	1	i12-34o
Gh_A08G274700.1	A08	124314020	124317099	-	100	CYP734A59_A	GhCYP734A59_A	517	GVRTCI	461	ESLRLYPP	383	1	i12-34o
Gh_A09G019100.1	A09	4458922	4459356	-	100	CYP736A339P_A	GhCYP736A339P_A	144	SLRLHP	111	EILRHPRV	68	1	i45-67o
Gh_A09G019200.1	A09	4473749	4477030	-	100	CYP736A192_A	GhCYP736A192_A	480	GRRRCP	416	ESLRLHPV	337	1	i7-26o
Gh_A09G033900.1	A09	9003185	9004093	-	95.47	CYP96A239P_A	GhCYP96A239P_A	302	GPRICL	244	EALRLYPP	164	0	o
Gh_A09G034000.1	A09	9017818	9019328	-	100	CYP96A131_A	GhCYP96A131_A	472	GPRICL	414	EALRLYPP	334	1	i5-24o
Gh_A09G035000.1	A09	9354694	9355761	-	100	CYP96A234_A	GhCYP96A234_A	355	GPRICL	297	EALRLYPP	217	0	o
Gh_A09G046000.1	A09	16139986	16141438	-	93.17	CYP94B71_A	GhCYP94B71_A	466	GPRVCL	406	ESMRLYPP	321	0	o
Gh_A09G049200.1	A09	23342949	23346692	+	100	CYP715A41_A	GhCYP715A41_A	448	GGRMCI	392	EVLRLYSS	313	0	o
Gh_A09G058700.1	A09	39973243	39974829	-	100	CYP736A193_A	GhCYP736A193_A	493	GRRVCP	431	ETLRLHPV	352	1	i7-25o
Gh_A09G061300.1	A09	42845727	42846209	+	100	CYP736A340P_A	GhCYP736A340P_A	160	GRRVCP	98	ETLRLYPV	19	0	o
Gh_A09G061500.1	A09	42994854	42996689	+	100	CYP736A196_A	GhCYP736A196_A	497	GRRLCP	435	EIFRLHPV	356	1	i5-27o
Gh_A09G112900.1	A09	63989875	63991605	+	100	CYP94C86_A	GhCYP94C86_A	500	GKRVCL	441	ESLRLFPP	362	1	i7-29o
Gh_A09G144300.1	A09	69734324	69735976	+	100	CYP712J4_A	GhCYP712J4_A	508	GRRVCA	444	ETLRLHSP	367	1	i7-28o
Gh_A09G144400.1	A09	69736491	69738102	+	88.17	CYP712C7_A	GhCYP712C7_A	453	GRRGCP	388	EILRLHPP	311	1	i5-24o
Gh_A09G144500.1	A09	69764829	69766488	+	99.8	CYP712C5_A	GhCYP712C5_A	512	GRRACP	447	ETLRLHPP	370	1	i13-30o
Gh_A09G144700.1	A09	69776804	69778522	+	99.61	CYP93A89_A	GhCYP93A89_A	517	GRRSCP	450	ETLRLHPG	365	1	i7-26o
Gh_A09G157900.1	A09	72004455	72005993	-	97.27	CYP94C87_A	GhCYP94C87_A	512	GFRVCL	449	ESMRLYPP	369	1	i13-35o
Gh_A09G162500.1	A09	72593308	72595333	-	100	CYP76A125P_A	GhCYP76A125P_A	154	CDRKCP	100	QTLHKLKP	57	1	o4-23i
Gh_A09G198900.1	A09	76833408	76835450	+	100	CYP715A39_A	GhCYP715A39_A	521	GGRMCV	465	EVLRLYSP	386	1	i13-35o
Gh_A09G212400.1	A09	77995460	77997348	-	100	CYP76F93_A	GhCYP76F93_A	485	GRRICS	424	ETFRMHPA	346	0	o
Gh_A09G212500.1	A09	78002626	78003642	-	73.15	CYP76F169_A-fragment1	GhCYP76F169_A-fragment1	156	GVRRRM	44	ERLQSRKS	66	0	o
Gh_A09G212600.1	A09	78003696	78004217	-	88.67	CYP76F170_A-fragment1	GhCYP76F170_A-fragment1	173	SQRKLP	31	EYLRQNKI	148	1	o5-24i
Gh_A09G212800.1	A09	78037066	78038033	-	77.69	CYP76F171P_A	GhCYP76F171P_A	258	GRRICP	197	ETFRMHPA	119	0	o
Gh_A09G212900.1	A09	78045606	78046477	-	99.56	CYP76F172P_A	GhCYP76F172P_A	226	GRRICP	165	ETFRMHPA	87	0	o
Gh_A09G213000.1	A09	78046514	78047299	-	100	CYP76F173P_A	GhCYP76F173P_A	261	GIRACQ	107	RTLRKVRN	128	0	o
Gh_A09G217700.1	A09	78387745	78411013	+	92.08	CYP88P3_A	GhCYP88P3_A	481	GSSTCP	424	ETLRRRTN	351	1	i5-22o
Gh_A09G217800.1	A09	78414232	78417577	+	99.79	CYP88P2_A	GhCYP88P2_A	480	GSSTCP	424	ETLRIRTN	351	1	i5-22o
Gh_A09G219000.1	A09	78648253	78649949	-	97.66	CYP93B85_A	GhCYP93B85_A	500	GRRGCP	436	ESFRLHPP	347	1	i5-24o
Gh_A09G226400.1	A09	79352123	79353695	-	99.8	CYP736A194_A	GhCYP736A194_A	499	GRRGCP	435	ESFRLHPV	357	1	i7-24o
Gh_A09G226500.1	A09	79359552	79361124	-	99	CYP736A195_A	GhCYP736A195_A	499	GRRGCP	435	ESFRLHPV	357	1	i7-24o
Gh_A10G004500.1	A10	376138	381346	-	94.34	CYP728D32P_A	GhCYP728D32P_A	571	GARICP	240	ETLRMNPP	166	0	o
Gh_A10G005000.1	A10	425706	427235	-	100	CYP77B25_A	GhCYP77B25_A	509	GRRICP	447	ETFRRHPP	365	0	o
Gh_A10G043500.1	A10	5014784	5017129	-	99.02	CYP92A131_A	GhCYP92A131_A	510	GRRMCP	442	ETMRLHPV	364	1	i5-24o
Gh_A10G043600.1	A10	5024462	5032448	-	94.12	CYP92A132_A	GhCYP92A132_A	494	GRRKCP	426	EAMRLHPV	348	1	i7-26o
Gh_A10G085200.1	A10	19075488	19077035	+	100	CYP84A77_A	GhCYP84A77_A	515	GRRSCP	448	ETLRLHPP	370	1	i7-29o
Gh_A10G119200.1	A10	66118904	66120058	-	100	CYP749A222P_A	GhCYP749A222P_A	318	GPRACV	258	ETLRLYAP	179	0	o
Gh_A10G119600.1	A10	66154621	66155843	-	100	CYP749A223P_A	GhCYP749A223P_A	349	GPRACV	289	ETLRLYTP	210	0	o
Gh_A10G120000.1	A10	67036398	67038025	+	100	CYP71AN53_A	GhCYP71AN53_A	502	GRRTCP	439	ETLRLHPP	360	1	i13-35o
Gh_A10G181700.1	A10	99951694	99954392	+	100	CYP73A26_A	GhCYP73A26_A	505	GRRSCP	443	ETLRLRMA	363	1	i5-24o
Gh_A10G184100.1	A10	100749327	100751204	-	92.79	CYP79A116_A	GhCYP79A116_A	540	GRRGCI	473	ITTRSQPP	58	1	i30-52o
Gh_A10G197100.1	A10	104971910	104973511	-	100	CYP83F44_A	GhCYP83F44_A	504	GRRVCP	442	ETFRLQTT	364	1	i2-21o
Gh_A10G197200.1	A10	105005985	105007582	-	100	CYP83F45_A	GhCYP83F45_A	503	GRRVCP	440	ETFRLQAI	362	1	i2-21o
Gh_A10G197300.1	A10	105009311	105010911	-	100	CYP83F46_A	GhCYP83F46_A	503	GRRVCP	440	ETFRLQAT	362	1	i5-22o
Gh_A10G197400.1	A10	105051015	105052634	-	100	CYP83F47_A	GhCYP83F47_A	503	GRRVCP	440	ETFRLHPT	362	2	o5-22,i298-320o
Gh_A10G197500.1	A10	105102104	105108924	+	100	CYP83F48_A	GhCYP83F48_A	565	GRRVCP	459	ETFRLQPV	387	1	i7-29o
Gh_A10G199400.1	A10	105483502	105485010	+	99.8	CYP94D66_A	GhCYP94D66_A	502	GPRMCL	445	ESLRLYPP	365	1	i5-27o
Gh_A10G202400.1	A10	106032989	106034586	-	100	CYP77A39_A	GhCYP77A39_A	505	GRRICP	443	ELLRRHPP	361	1	i5-22o
Gh_A10G203700.1	A10	106370324	106372187	+	100	CYP714E34_A	GhCYP714E34_A	510	GPRSCF	454	ETLRLYPL	376	1	i7-29o
Gh_A10G204100.1	A10	106532418	106541315	-	100	CYP71AN52_A	GhCYP71AN52_A	453	GRKMCP	389	ETLRLHPV	311	0	o
Gh_A10G221400.1	A10	110120868	110123918	+	100	CYP706P1_A	GhCYP706P1_A	529	GRRICV	463	ETFRIHPP	383	1	i19-41o
Gh_A10G245100.1	A10	113950871	113955847	+	100	CYP90A47_A	GhCYP90A47_A.1	470	GPRLCP	414	ETLQLIAA	44	1	i2-21o
Gh_A10G245100.2	A10	113950880	113955629	+	97.45	CYP90A47_A	GhCYP90A47_A.2	458	GPRLCP	414	ETLQLIAA	44	1	o4-21i
Gh_A10G246600.1	A10	114089561	114092112	+	100	CYP71BG3_A	GhCYP71BG3_A	502	GRRGCP	438	EAMRLHPT	360	1	i9-26o
Gh_A11G006600.1a	A11	592264	605937	-	91.69	CYP706Q4_A	GhCYP706Q4_A	339	GWSWGCH	15	ETLRLHPV	641	1	i21-43o
Gh_A11G006600.1b	A11	592264	605937	-	91.69	CYP706Q12_A	GhCYP706Q12_A	446	GRRMCV	380	EVRRMVTE	109	1	i5-24o
Gh_A11G006700.1	A11	610634	611089	-	95.83	CYP706Q6P_A	GhCYP706Q6P_A	151	GRRICV	85	DPLRFQPE	56	0	o
Gh_A11G006800.1	A11	616056	617407	-	100	CYP706Q9_A	GhCYP706Q9_A	425	GLDACY	163	ETLRLHPV	388	1	i23-45o
Gh_A11G040100.1	A11	3385504	3387051	-	100	CYP94B70_A	GhCYP94B70_A	515	GPRVCL	456	ESMRLYPP	372	1	i5-27o
Gh_A11G047000.1	A11	4011448	4013983	-	100	CYP84A79_A	GhCYP84A79_A	517	GRRSCP	450	ETLRLHPP	372	1	i13-30o
Gh_A11G088500.1	A11	7758911	7760833	+	100	CYP704A129_A	GhCYP704A129_A	523	GPRICL	458	ETLRLYPV	379	1	i7-29o
Gh_A11G088600.1	A11	7771781	7773859	+	99.6	CYP704A264_A	GhCYP704A264_A	506	GPRVCL	446	ETIRLYPA	366	1	i7-26o
Gh_A11G088700.1	A11	7818059	7820541	+	100	CYP704A263_A	GhCYP704A263_A	506	GPRICL	446	ETLRLYPA	366	1	i7-26o
Gh_A11G096300.1	A11	8458597	8460183	-	99.81	CYP86A133_A	GhCYP86A133_A	528	GPRICL	453	ETLRLFPS	372	1	i7-24o
Gh_A11G107100.1	A11	9851974	9854177	+	99.63	CYP78A198_A	GhCYP78A198_A	540	GRRTCP	474	EVLRLHPP	391	1	i25-47o
Gh_A11G142900.1	A11	15582231	15585155	+	99.8	CYP92A28_A	GhCYP92A28_A	511	GRRMCP	442	ETMRLHPV	364	1	i5-24o
Gh_A11G156600.1	A11	17650661	17653970	+	99.8	CYP724B28_A	GhCYP724B28_A	490	GSRCCP	431	ISLPLYIP	218	1	i7-29o
Gh_A11G164200.1	A11	19500533	19511657	+	100	CYP74B25_A	GhCYP74B25_A	512	NTRVCA	152	ETLRMNPP	384	0	o
Gh_A11G173000.1	A11	21355127	21357952	+	100	CYP735A40_A	GhCYP735A40_A	522	GPRNCI	461	ESLRLYPP	386	1	i12-34o
Gh_A11G189600.1	A11	24944435	24946604	-	100	CYP84A78_A	GhCYP84A78_A	521	GRRSCP	454	ETLRLHPP	376	1	i21-38o
Gh_A11G190700.1	A11	25498762	25503373	-	99.8	CYP90C26_A	GhCYP90C26_A	509	GQRLCP	456	ETLRLANI	381	1	i20-42o
Gh_A11G194900.1	A11	26390526	26394471	-	100	CYP90B35_A	GhCYP90B35_A	485	GPRLCA	431	ETLRLGNV	346	1	i7-24o
Gh_A11G199600.1	A11	28197254	28198282	-	95	CYP82C141P_A	GhCYP82C141P_A	234	GRRSCP	107	ETLRLYPP	26	0	o
Gh_A11G199700.1	A11	28198320	28199482	-	96.05	CYP82C142P_A	GhCYP82C142P_A	338	PTRSCN	31	FSLRLGSH	74	2	o4-26,i227-246o
Gh_A11G199800.1	A11	28237474	28238651	-	93.28	CYP82C143P_A	GhCYP82C143P_A	198	GRRSCP	91	ETLCLYPP	10	0	o
Gh_A11G199900.1	A11	28279462	28282610	-	100	CYP82C136_A	GhCYP82C136_A	523	GRRSCP	456	ETLRLYPS	375	2	o4-22,i224-246o
Gh_A11G211400.1	A11	38044020	38045675	-	100	CYP96A130_A	GhCYP96A130_A	499	GPRTCL	441	EALRLYPP	361	0	o
Gh_A11G237300.1	A11	63789286	63790021	+	62.61	CYP81AT7P_A	GhCYP81AT7P_A	173	GGYDVP	67	EVLKKAKA	53	0	o
Gh_A11G237400.1	A11	63849485	63851069	+	100	CYP81AT2_A	GhCYP81AT2_A	500	GRRACP	431	ETLRLYPA	356	1	i7-24o
Gh_A11G239400.1	A11	64993203	64993706	+	95.39	CYP96A133P_A	GhCYP96A133P_A	167	KQRMVA	122	EFKQLFDV	100	1	o4-22i
Gh_A11G239500.1	A11	64993892	64994717	+	80.29	CYP96A240P_A	GhCYP96A240P_A	261	GPRTCL	203	EELQSKLP	105	0	o
Gh_A11G249100.1	A11	82334012	82335610	-	91.96	CYP73A286_A	GhCYP73A286_A	509	GRRSCP	470	ETLRLHTP	386	1	i13-35o
Gh_A11G347200.1	A11	115573271	115574797	+	100	CYP89A154_A	GhCYP89A154_A	508	GRRICP	448	EGLRRHPP	368	0	o
Gh_A11G347400.1	A11	115588293	115589822	+	99.41	CYP89A155_A	GhCYP89A155_A	509	GRRICP	449	EGLRRHPP	369	1	i5-27o
Gh_A11G370500.1	A11	118730888	118732854	-	100	CYP76G21_A	GhCYP76G21_A	513	GRRMCP	447	ETLRLHPP	368	1	i5-22o
Gh_A11G371300.1	A11	118779047	118783296	-	100	CYP97C38_A	GhCYP97C38_A	548	GPRKCV	482	ESLRLYPH	402	0	o
Gh_A12G025900.1	A12	3597013	3597357	-	80.2	CYP96K8P_A	GhCYP96K8P_A	114	GPRICP	56	EVLFLVMK	64	0	o
Gh_A12G026100.1	A12	3601835	3603370	-	99.8	CYP96K6_A	GhCYP96K6_A	511	GPRICP	453	ETLRLHPP	373	1	i5-27o
Gh_A12G030200.1	A12	4447259	4449098	+	99.07	CYP82C59c_A	GhCYP82C59c_A	439	GKRYSC	201	ETLRIKPP	375	2	o10-29,i223-245o
Gh_A12G058400.1	A12	11734567	11736552	-	100	CYP735A41_A	GhCYP735A41_A	519	GPRNCI	461	ESLRLYPP	386	1	i5-27o
Gh_A12G060900.1	A12	12932957	12934539	-	100	CYP81AT1_A	GhCYP81AT1_A	500	GRRACP	434	ETLRLYPA	357	1	i7-24o
Gh_A12G067300.1	A12	14636583	14638907	+	100	CYP722C9_A	GhCYP722C9_A	491	GPRTCL	431	ETLRMANV	359	1	i12-34o
Gh_A12G083300.1	A12	29454859	29457186	+	94.44	CYP81BA2_A	GhCYP81BA2_A	493	RRRACP	426	ETLRLYPA	349	0	o
Gh_A12G098800.1	A12	52055530	52057089	+	100	CYP77A40_A	GhCYP77A40_A	519	GRRICP	456	EVLRKHPP	375	1	i13-35o
Gh_A12G114000.1	A12	74941185	74943075	-	95.05	CYP714E37_A	GhCYP714E37_A	522	GARICT	466	ETLRLYPP	388	1	i7-29o
Gh_A12G129100.1	A12	78275588	78277580	-	100	CYP703A26_A	GhCYP703A26_A	524	GKRKCP	456	ETFRMHPA	374	2	o4-21,i217-236o
Gh_A12G130800.1	A12	78660365	78662285	+	100	CYP78A199_A	GhCYP78A199_A	533	GRRTCP	471	EVLRLHPP	388	1	i26-48o
Gh_A12G159000.1	A12	84479193	84481628	+	100	CYP72A507_A	GhCYP72A507_A	514	GPRICI	454	EVMRLYPS	377	1	i7-25o
Gh_A12G160300.1	A12	85034280	85038482	+	99.79	CYP51G1_A	GhCYP51G1_A	486	GRHGCL	425	EALRLHPP	342	1	i7-29o
Gh_A12G166000.1	A12	86998725	87004895	+	100	CYP71AS19_A	GhCYP71AS19_A	514	GRRGCP	444	ETLRLHPP	366	2	o5-24,i301-323o
Gh_A12G181800.1	A12	90711712	90713370	-	100	CYP78A200_A	GhCYP78A200_A	519	GRRVCP	459	ETLRVHPP	380	2	o20-42,i49-71o
Gh_A12G185700.1	A12	91256008	91258273	+	98.69	CYP704B42_A	GhCYP704B42_A	534	GPRICL	476	ETLRLYPA	397	1	i7-29o
Gh_A12G204700.1	A12	95306029	95311206	+	100	CYP75B105_A	GhCYP75B105_A	510	GRRICA	443	ETFRLHPS	361	1	i2-21o
Gh_A12G208600.1	A12	95850991	95852324	-	100	CYP71AN70P_A	GhCYP71AN70P_A	259	GRRGRP	139	ETLRLHPA	61	0	o
Gh_A12G208800.1	A12	95862160	95863875	-	100	CYP71AN55_A	GhCYP71AN55_A	539	GRRGCP	469	ETLRLHPA	391	2	o36-58,i244-266o
Gh_A12G208900.1	A12	95901211	95902968	+	96.44	CYP71BF13_A	GhCYP71BF13_A	526	SGRTCP	463	ETLRLHPP	386	1	i37-59o
Gh_A12G213900.1	A12	96516059	96517557	-	73.96	CYP71BF17P	GhCYP71BF17P	410	GTRVII	343	ETLRLYPP	313	1	i39-61o
Gh_A12G225800.1	A12	98249804	98252187	-	100	CYP707A142_A	GhCYP707A142_A	463	GTHSCP	408	ETFHLYSQ	48	1	i5-27o
Gh_A12G229400.1	A12	98561468	98563038	-	100	CYP76Y17_A	GhCYP76Y17_A	499	GRRLCL	435	ETLRLHPA	357	0	o
Gh_A12G229500.1	A12	98563367	98566409	-	95.68	CYP76Y16_A	GhCYP76Y16_A	488	GRRICP	429	ETMRLHPA	351	0	o
Gh_A12G246100.1	A12	100553876	100556356	+	100	CYP706C46_A	GhCYP706C46_A	380	GRRICA	313	ESLRLHPV	235	0	o
Gh_A12G254700.1	A12	101317288	101320184	-	100	CYP86A134_A	GhCYP86A134_A	561	GPRICL	453	ETLRLYPS	372	1	i5-27o
Gh_A12G264800.1	A12	102309515	102311707	-	99.81	CYP78A201_A	GhCYP78A201_A	530	GRRSCP	470	EVLRLHPP	386	1	i26-48o
Gh_A12G282300.1	A12	103870757	103875571	-	100	CYP715A40_A	GhCYP715A40_A	519	GGRMCV	463	EVLRLYSP	384	2	o10-32,i98-117o
Gh_A12G285200.1	A12	104098720	104105901	-	54	CYP87A97_A	GhCYP87A97_A	460	GVRLCA	403	EKLRGCNS	171	1	i5-22o
Gh_A12G290100.1	A12	104513786	104516878	+	100	CYP706P3_A	GhCYP706P3_A	530	GRRICV	464	ETLRIHPP	384	1	i20-42o
Gh_A12G290200.1	A12	104520411	104523157	+	100	CYP706P2_A	GhCYP706P2_A	531	GRRICV	465	ETLRIHPP	385	1	i20-42o
Gh_A12G290300.1	A12	104527275	104528965	+	90.91	CYP706P6P_A	GhCYP706P6P_A	242	GRRICV	176	ETLRIHPP	96	0	o
Gh_A12G290400.1	A12	104533138	104538063	+	100	CYP706P4_A	GhCYP706P4_A	402	RRRICV	336	ETLRIHPP	256	0	o
Gh_A13G001300.1	A13	111013	115285	+	99.8	CYP98A95_A	GhCYP98A95_A	509	GRRVCP	435	EALRLHPP	357	1	i2-24o
Gh_A13G013700.1	A13	1446912	1450355	-	100	CYP88A80_A	GhCYP88A80_A	495	GSRLCP	432	ETLRLVTF	359	0	o
Gh_A13G019100.1	A13	1956598	1958099	+	65.4	CYP714E79_A-partial	GhCYP714E79_A-partial	262	GPHTCL	206	ESLRLYSP	128	0	o
Gh_A13G022500.1	A13	2340224	2340703	-	91.82	CYP736A344P_A	GhCYP736A344P_A	159	GRRGCP	98	ESLRLHPV	19	0	o
Gh_A13G022600.1	A13	2340727	2344510	-	85.28	CYP736A345P_A	GhCYP736A345P_A	315	GKKYGP	63	ETMLLAGV	188	1	o4-23i
Gh_A13G022800.1	A13	2380721	2384897	-	100	CYP736A197_A	GhCYP736A197_A	506	GRRGCP	442	ESLRLHPV	363	1	i2-24o
Gh_A13G023000.1	A13	2418933	2421588	-	100	CYP736A198_A	GhCYP736A198_A	507	GRRGCP	443	ESLRLHPV	364	1	i2-24o
Gh_A13G029300.1	A13	3189647	3192130	-	100	CYP84A80_A	GhCYP84A80_A	544	GRRSCP	459	ETLRLHPP	381	1	i12-34o
Gh_A13G037600.1	A13	4370855	4372735	+	96.72	CYP749A205_A	GhCYP749A205_A	519	GPRSCI	459	ETLRLYPP	380	1	i7-29o
Gh_A13G037800.1	A13	4387981	4390040	+	99.43	CYP749A200_A	GhCYP749A200_A	529	GPRSCV	469	ETLRLYPP	390	1	i20-42o
Gh_A13G038000.1	A13	4471183	4473763	+	99.03	CYP749A203_A	GhCYP749A203_A	539	GPRSCV	459	ETLRLYPP	380	1	i7-28o
Gh_A13G039800.1	A13	4805131	4807971	-	100	CYP707A268_A	GhCYP707A268_A	476	GVHACP	416	ETLQLYSQ	50	1	i5-24o
Gh_A13G060600.1	A13	11791097	11793648	-	98.57	CYP749A224_A	GhCYP749A224_A	417	GHRSCV	360	ETLRLYPP	281	1	i7-29o
Gh_A13G060700.1	A13	11836764	11838285	-	100	CYP749A212_A	GhCYP749A212_A	372	GIRGPP	42	ETLRLYPP	353	1	i7-29o
Gh_A13G062500.1	A13	12162422	12165483	-	100	CYP86B33_A	GhCYP86B33_A	539	GPRLCL	473	EALRLYPS	394	2	o28-50,i57-74o
Gh_A13G086400.1	A13	28055729	28058010	-	100	CYP85A42_A	GhCYP85A42_A	466	GSRLCP	410	ETSRLATV	336	1	i2-24o
Gh_A13G087100.1	A13	28490009	28491649	-	100	CYP78A202_A	GhCYP78A202_A	518	GRRVCP	458	ETLRVHPP	379	2	o20-42,i49-71o
Gh_A13G107000.1	A13	53789304	53791728	+	99.81	CYP749A75_A	GhCYP749A75_A	520	GPRTCV	457	EALRLYPP	378	1	i7-29o
Gh_A13G110700.1	A13	59028800	59030631	-	100	CYP89A157_A	GhCYP89A157_A	517	GRRICP	457	EGLRRHPP	372	1	i5-27o
Gh_A13G134100.1	A13	81284038	81285724	-	100	CYP716E46_A	GhCYP716E46_A	502	GPRMCP	445	EVMRLAPP	372	1	i25-47o
Gh_A13G135500.1	A13	83223499	83225141	+	99.38	CYP716E47_A	GhCYP716E47_A	487	GPRMCP	430	EVMRLAPP	357	1	i12-34o
Gh_A13G137500.1	A13	84206030	84208332	+	99.81	CYP93B35_A	GhCYP93B35_A	532	GRRGCP	452	ESFRLHPP	365	1	i7-29o
Gh_A13G139700.1	A13	86219503	86220625	-	94.87	CYP93B86P_A	GhCYP93B86P_A	326	GFFGCC	314	ETLNLSKS	171	1	i7-29o
Gh_A13G140300.1	A13	86545785	86547387	+	100	CYP71BE76_A	GhCYP71BE76_A	508	GKRICP	440	ETLRLHPP	362	1	i5-22o
Gh_A13G152100.1	A13	90521796	90523596	+	99.61	CYP71BE77_A	GhCYP71BE77_A	512	GRRICP	438	ETLRLHPI	360	1	i5-22o
Gh_A13G153200.1	A13	91040104	91042060	+	99.8	CYP71BE79_A	GhCYP71BE79_A	508	GRRMCP	440	ETFRIRPS	362	0	o
Gh_A13G175600.1	A13	97067881	97073569	-	100	CYP97A50_A	GhCYP97A50_A	614	GPRKCV	519	ESLRLYPQ	440	0	o
Gh_A13G176100.1	A13	97189598	97191002	-	89.8	CYP71BE171P_A	GhCYP71BE171P_A	306	GRRICP	239	EAETFYPK	210	0	o
Gh_A13G225600.1	A13	104878664	104880283	+	99.8	CYP71AN73_A	GhCYP71AN73_A	506	GRRACP	448	ETLRLHPA	369	2	o6-28,i214-233o
Gh_A13G262900.1	A13	108551571	108553936	+	100	CYP73A25_A	GhCYP73A25_A	505	GRRSCP	443	ETLRLRMA	363	0	o
Gh_Contig00374G000400.1	Contig00374	52960	55852	-	94.33	CYP716E47b_U	GhCYP716E47b_U	464	GPRMCP	407	EVMRLAPP	334	0	o
Gh_Contig00374G000400.2	Contig00374	53796	55855	-	95.86	CYP716E47a_U	GhCYP716E47a_U	471	GPRMCP	414	EVMRLAPP	341	1	i7-28o
Gh_Contig00374G000600.1	Contig00374	80751	84887	-	100	CYP93B35_D	GhCYP93B35_D	519	GRRGCP	452	ESFRLHPP	365	1	i7-29o
Gh_Contig00640G000800.1	Contig00640	84110	86167	+	100	CYP71BE155_U	GhCYP71BE155_U	503	GRRICP	438	ETLRLHPI	360	1	i5-22o
Gh_Contig00640G001000.1	Contig00640	103526	105530	+	100	CYP71BE78_D	GhCYP71BE78_D	500	GRRICP	435	ETLRLHPV	357	1	i7-26o
Gh_Contig00640G001100.1	Contig00640	116731	119513	+	100	CYP71BE172P_U	GhCYP71BE172P_U	284	GDFMCL	30	ETLATAIE	222	0	o
Gh_Contig00640G001200.1	Contig00640	128282	130527	+	100	CYP97A50_D	GhCYP97A50_D	618	GPRKCV	521	ESLRLYPQ	442	0	o
Gh_Contig01033_ERROPOS3049310_G004200.1					100	CYP71BE80_D	GhCYP71BE80_D	479	GRRICP	412	ETMRLHPP	334	1	o4-26i
Gh_Contig01226G001600.1	Contig01226	200248	201970	-	97	CYP71AN72_U	GhCYP71AN72_U	518	GRRACP	434	ETLRLHPA	355	2	o6-28,i204-223o
Gh_Contig01226G001700.1	Contig01226	203705	205181	-	100	CYP73A25_D	GhCYP73A25_D	505	GRRSCP	443	ETLRLRMA	363	0	o
Gh_D01G059500.1	D01	6614556	6616380	-	100	CYP87B30_D	GhCYP87B30_D	482	GDRPCA	426	ETLRLENV	351	1	i5-27o
Gh_D01G059700.1	D01	6678221	6680042	-	100	CYP87B29_D	GhCYP87B29_D	480	GNRPCA	424	ETLRLENV	349	2	o4-23,i277-299o
Gh_D01G076100.1	D01	9639092	9640827	-	99.81	CYP72A502_D	GhCYP72A502_D	518	GPRICV	459	EVLRLYPP	381	1	i5-24o
Gh_D01G085100.1	D01	10802921	10810053	-	99.61	CYP72A503_D	GhCYP72A503_D	518	GPRICI	459	EVLRLYPP	381	1	i13-32o
Gh_D01G085300.1	D01	10839824	10841570	-	100	CYP72A504_D	GhCYP72A504_D	518	GPRICI	459	EVLRLYPS	381	1	i13-32o
Gh_D01G085400.1	D01	10867750	10869709	-	99.81	CYP72A848_D	GhCYP72A848_D	518	GPRICI	459	EVLRLYPA	381	1	i5-27o
Gh_D01G085500.1	D01	10891738	10893705	-	100	CYP716C26_A	GhCYP716C26_A	486	GLRMCP	430	EVMRLTPP	356	1	i7-29o
Gh_D01G085700.1	D01	10927007	10930165	-	99.45	CYP82C51_A	GhCYP82C51_A	549	GRRICP	484	ETLRLYPA	404	2	o38-57,i254-276o
Gh_D01G085900.1	D01	10981246	10982552	+	94.93	CYP82C137_D	GhCYP82C137_D	465	GRRIVL	450	ETMRLYPA	370	1	i7-26o
Gh_D01G086000.1	D01	10996874	10997449	+	97.11	CYP736A190_D	GhCYP736A190_D	509	GRRGCP	445	ESFRLHPV	366	1	i13-35o
Gh_D01G086100.1	D01	11040572	11042850	-	97.5	CYP736A189_D	GhCYP736A189_D	519	GRRGCP	455	ESFRLHPA	376	1	i13-35o
Gh_D01G120300.1	D01	19034442	19038423	+	100	CYP736A331_D	GhCYP736A331_D	519	GRRGCP	455	ESFRLHPV	376	1	i13-35o
Gh_D01G121300.1	D01	19260153	19261806	+	100	CYP728B54_D	GhCYP728B54_D	474	GPRICP	416	ETLRMFPP	342	0	o
Gh_D01G172400.1	D01	49613075	49616095	-	99.61	CYP71BE64_D	GhCYP71BE64_D	516	GRRICP	449	ETLRLHNP	372	1	i7-29o
Gh_D01G215800.1	D01	60388282	60390434	-	99.8	CYP71BE65_D	GhCYP71BE65_D	508	GRRMCP	441	ETLRLHPP	363	1	i7-26o
Gh_D01G215900.1	D01	60394693	60396316	-	100	CYP71BE66_D	GhCYP71BE66_D	502	GRRMCP	436	ETLRLHPP	358	1	i5-22o
Gh_D01G216000.1	D01	60446036	60448111	+	100	CYP71BE154_D	GhCYP71BE154_D	509	GRRICP	437	ETLRLHPP	359	1	i5-22o
Gh_D01G218000.1	D01	60716381	60718379	+	88.42	CYP71BE173P_D	GhCYP71BE173P_D	250	GEMLCN	162	EAPKTLPP	29	1	o4-23i
Gh_D01G227900.1	D01	62212736	62214205	+	89.47	CYP71BE174P_D	GhCYP71BE174P_D	349	GRRICP	286	EAERFYPE	257	0	o
Gh_D02G005900.1	D02	375457	377156	+	90.48	CYP71BE175P_D	GhCYP71BE175P_D	191	GEMLCN	173	EAPKNLPP	29	1	o4-23i
Gh_D02G032600.1	D02	3578213	3580291	+	91.97	CYP71BE176P_D	GhCYP71BE176P_D	368	GRRICP	300	ETLRLHPP	222	0	o
Gh_D02G032700.1	D02	3583310	3585631	+	100	CYP721A90_D	GhCYP721A90_D	507	GPRFCV	449	ETLRLYPP	375	1	i5-27o
Gh_D02G032700.2	D02	3583262	3585635	+	100	CYP82D144_D	GhCYP82D144_D	520	GRRMCP	456	ETLRLYPA	376	2	o10-27,i314-336o
Gh_D02G032800.1	D02	3588171	3591051	+	99.43	CYP78A191_D	GhCYP78A191_D	524	GRRVCP	460	EVLRMHPP	381	2	o4-22,i29-51o
Gh_D02G033000.1	D02	3602690	3610178	+	100	CYP93A87_D	GhCYP93A87_D	505	GRRSCP	442	ETLRLHPA	362	1	i7-26o
Gh_D02G033100.1	D02	3619402	3621648	+	100	CYP93A88_D	GhCYP93A88_D	515	GRRSCP	449	ETLRLHPS	363	1	i7-26o
Gh_D02G033200.1	D02	3623928	3624883	+	96.5	CYP712A11_D	GhCYP712A11_D	503	GRRGCP	441	ETLRLHPS	367	0	o
Gh_D02G033400.1	D02	3635029	3636263	+	99.8	CYP98A94_D	GhCYP98A94_D	508	GRRVCP	434	EALRLHPP	356	0	o
Gh_D02G033500.1	D02	3656973	3659235	+	100	CYP94C88_D	GhCYP94C88_D	489	GFRVCL	425	ESMRLYPP	345	1	i7-24o
Gh_D02G033600.1	D02	3671070	3673572	+	100	CYP71BE69_D	GhCYP71BE69_D	498	GRRICP	432	ESIRLHPA	355	1	i2-21o
Gh_D02G033600.2	D02	3671070	3673552	+	100	CYP749A207_D	GhCYP749A207_D	512	GPRFCV	452	ETLRLYGA	373	1	i3-25o
Gh_D02G033800.1	D02	3693521	3695706	+	100	CYP749A210b_D	GhCYP749A210b_D	400	GPRFCV	340	ETLRLYGP	261	0	o
Gh_D02G033900.1	D02	3729088	3731566	+	100	CYP749A210a_D	GhCYP749A210a_D	512	GPRFCV	452	ETLRLYGP	373	1	i3-25o
Gh_D02G034000.1	D02	3740427	3742678	+	100	CYP749A71_D	GhCYP749A71_D	516	GPRSCV	456	ETLRLYGP	377	1	i7-29o
Gh_D02G034100.1	D02	3747940	3750689	+	99.61	CYP749A65_D	GhCYP749A65_D	515	GSRSCV	455	ETLRLYGP	376	1	i7-29o
Gh_D02G034200.1	D02	3754373	3756314	+	100	CYP749A72a_D	GhCYP749A72a_D	512	GPRSCV	452	ETLRLYGP	373	1	i3-25o
Gh_D02G034300.1	D02	3763378	3764336	+	100	CYP736A346P_D	GhCYP736A346P_D	265	GPRSCI	205	ETLRLYGP	126	0	o
Gh_D02G034400.1	D02	3775352	3786100	+	99.7	CYP749A225P_D	GhCYP749A225P_D	338	GPRSCV	278	ETLRLYGP	199	0	o
Gh_D02G034500.1	D02	3794277	3796146	+	100	CYP749A72b_D	GhCYP749A72b_D	512	GPRSCV	452	ETLRLYGP	373	1	i3-25o
Gh_D02G034800.1	D02	3826690	3828626	+	94.56	CYP749A226P_D	GhCYP749A226P_D	349	GPRSCV	289	ETLRMYGP	210	0	o
Gh_D02G035000.1	D02	3833150	3834649	+	94.56	CYP749A227P_D	GhCYP749A227P_D	349	GPRSCV	289	ETLRMYGP	210	0	o
Gh_D02G035100.1	D02	3849451	3851324	+	98.84	CYP749A66_D	GhCYP749A66_D	516	GPRSCV	456	ETLRLYGP	377	1	i7-29o
Gh_D02G035200.1	D02	3864556	3867852	+	99.6	CYP749A211_D	GhCYP749A211_D	515	GPRSCV	455	ETLRLYGP	376	1	i7-29o
Gh_D02G035300.1	D02	3870413	3872386	+	92.59	CYP749A228_D	GhCYP749A228_D	499	GPRSCV	439	ETLRLYGP	360	0	o
Gh_D02G079100.1	D02	10063336	10065858	+	100	CYP749A199_D	GhCYP749A199_D	514	GPRSCV	455	ETLRLYGP	376	1	i3-25o
Gh_D02G099800.1	D02	16938287	16939904	-	93.6	CYP749A198_D	GhCYP749A198_D	516	GPRSCV	456	ETLRLYGP	377	1	i7-29o
Gh_D02G145200.1	D02	45853686	45855343	+	99.31	CYP736A347P_D	GhCYP736A347P_D	291	GPRSCV	231	ETLRLYGP	152	0	o
Gh_D02G174400.1	D02	58352120	58353697	+	96.12	CYP749A196_D	GhCYP749A196_D	516	GPRTCV	456	ETLRLYGP	377	1	i7-29o
Gh_D02G175100.1	D02	58531498	58532836	-	100	CYP749A192_D	GhCYP749A192_D	516	GPRNCV	456	ETLRLYGP	377	1	i7-29o
Gh_D02G195900.1	D02	63796688	63799381	+	90.5	CYP749A229_D	GhCYP749A229_D	506	GPRSCV	446	ETLRLYGP	367	1	i7-29o
Gh_D02G234400.1a	D02	68829684	68833816	+	100	CYP749A183P_D	GhCYP749A183P_D	136	GPRTCV	86	ETLRLYGP	7	0	o
Gh_D02G234400.1b	D02	68829684	68833816	+		CYP749A216P_D	GhCYP749A216P_D	145	GPRSCV	86	ETLRLYGP	7	0	o
Gh_D03G011600.1	D03	834440	841599	-	100	CYP749A194_D	GhCYP749A194_D	516	GPRNCV	456	ETLRLYGP	377	1	i7-29o
Gh_D03G024400.1	D03	2205220	2206804	-	99.8	CYP749A68_D	GhCYP749A68_D	511	GPRSCV	452	ETLRLYGP	373	1	i3-25o
Gh_D03G024500.1	D03	2224564	2226164	-	100	CYP749A191_D	GhCYP749A191_D	514	GPRNCV	454	ETLRLYGP	375	1	i7-29o
Gh_D03G027400.1	D03	2562228	2565701	-	79.37	CYP733A1_D	GhCYP733A1_D	475	GPRMCP	420	ETLRRATI	350	1	i5-27o
Gh_D03G049700.1	D03	6533324	6535035	-	100	CYP81B88_D	GhCYP81B88_D	508	GRRGCP	440	ETFRMCPP	364	1	i3-20o
Gh_D03G054600.1	D03	7923281	7924736	-	100	CYP78A192_D	GhCYP78A192_D	518	GRRVCP	458	ETLRVHPP	379	2	o20-42,i49-71o
Gh_D03G061000.1	D03	10281555	10283093	+	100	CYP86C17_D	GhCYP86C17_D	525	GPRLCL	464	ESLRLYPS	385	2	o15-37,i49-71o
Gh_D03G096600.1	D03	33736529	33739182	+	100	CYP71AS20_D	GhCYP71AS20_D	415	GRRICP	352	ETLRLHPP	274	0	o
Gh_D03G116100.1	D03	39913755	39915399	-	100	CYP51G32_D	GhCYP51G32_D	486	GRHGCL	425	EALRLHPP	342	1	i7-29o
Gh_D03G116300.1	D03	39940101	39941702	+	100	CYP707A138_D	GhCYP707A138_D	473	GVHACP	413	ETLQLYSE	47	0	o
Gh_D03G129300.1	D03	43177938	43179469	-	100	CYP90C25_D	GhCYP90C25_D	516	GQRLCP	459	ETLRMANI	384	1	i17-34o
Gh_D03G132400.1	D03	44018939	44020474	-	100	CYP83F65_D	GhCYP83F65_D	497	GRRVCP	434	ETFRLQPI	356	1	i2-21o
Gh_D03G134100.1	D03	44486582	44492503	+	90.2	CYP83F67_D	GhCYP83F67_D	482	GRRVCP	413	ETFRLQPI	346	1	i2-21o
Gh_D03G138900.1	D03	45422145	45425029	+	100	CYP81BA1_D	GhCYP81BA1_D	494	GRRACP	429	ETLRLYPA	352	0	o
Gh_D03G171900.1	D03	50605725	50607905	-	100	CYP78A193_D	GhCYP78A193_D	537	GRRVCP	472	ETLRIHPP	392	1	i29-51o
Gh_D03G172000.1	D03	50614889	50618431	-	95.64	CYP89A283_D	GhCYP89A283_D	439	GKRMCP	402	ESLRRHPP	322	1	i2-24o
Gh_D03G175600.1	D03	50995690	50998680	+	100	CYP89A152_D	GhCYP89A152_D	512	GRRICP	449	EGLRRHPP	368	1	i5-27o
Gh_D03G175700.1	D03	51014581	51017338	+	95.66	CYP78A194_D	GhCYP78A194_D	530	GRRACP	469	EVLRLHPP	384	1	i26-48o
Gh_D03G175800.1	D03	51053519	51056681	+	100	CYP71AN68_D	GhCYP71AN68_D	516	GRRVCP	452	ETLRLHAP	376	0	o
Gh_D03G175900.1	D03	51060334	51062113	+	100	CYP71AP34_D	GhCYP71AP34_D	508	GRRSCP	445	ETWRLHPP	367	0	o
Gh_D03G176000.1	D03	51097103	51098789	-	97.34	CYP94B68_D	GhCYP94B68_D	497	GPRVCL	438	ESMRLYPP	354	1	i2-24o
Gh_D03G176100.1	D03	51103544	51105543	+	100	CYP86A128_D	GhCYP86A128_D	511	GPRTCL	452	ETLRLYPS	370	1	i7-24o
Gh_D03G176200.1	D03	51110213	51113836	+	96.93	CYP87B31_D	GhCYP87B31_D	467	GNRACA	418	ETLRLGNF	343	3	o5-24,i271-293,o431-453i
Gh_D04G010500.1	D04	1296678	1300074	+	99.6	CYP707A144_D	GhCYP707A144_D	500	GVHSCP	443	ETLKLYKE	77	1	o30-52i
Gh_D04G018800.1	D04	2533638	2535166	+	100	CYP87A56_D	GhCYP87A56_D	474	GMRFCV	416	ETVRLANI	341	1	i2-21o
Gh_D04G019000.1	D04	2553641	2555176	-	100	CYP87A54_D	GhCYP87A54_D	486	GLRFCV	428	ETLQFFSP	55	1	i13-34o
Gh_D04G021000.1	D04	2820131	2822065	-	99.44	CYP706B19_D	GhCYP706B19_D	532	GRRKCP	466	ETFRLHPA	386	1	i21-43o
Gh_D04G040300.1	D04	5578984	5580595	-	97.37	CYP706B20_D	GhCYP706B20_D	518	GRRKCP	452	ETFRLHPA	372	1	i21-43o
Gh_D04G065800.1	D04	10047367	10050060	-	100	CYP706B21_D	GhCYP706B21_D	532	GRRKCP	466	ETFRLHPA	386	1	i21-43o
Gh_D04G088000.1	D04	15915244	15916770	+	72.92	CYP706B27_D	GhCYP706B27_D	537	GPRGLP	55	ETFRLHPP	365	1	i21-43o
Gh_D04G117000.1	D04	35479947	35481449	+	89.56	CYP706B2_D	GhCYP706B2_D	482	GRRKCP	413	ETFRLHPV	333	1	i21-43o
Gh_D04G121500.1	D04	37559261	37560875	-	100	CYP706B1_D	GhCYP706B1_D	536	GRRMCA	469	ETFRLHPP	389	1	i21-43o
Gh_D04G169100.1	D04	50839297	50841552	-	100	CYP706B1_D	GhCYP706B3_D	389	GRRICA	322	EAFRLHPP	242	0	o
Gh_D04G197600.1	D04	54024563	54026763	-	99.81	CYP714A30_D	GhCYP714A30_D	521	GSRLCL	465	EALRLYPP	387	1	i7-29o
Gh_D04G197700.1	D04	54027393	54030767	-	94.91	CYP96K1_A	GhCYP96K1_A	490	GPRICP	432	ETLRLYPP	352	1	i5-24o
Gh_D04G197800.1	D04	54037824	54038747	+	100	CYP96K1_D	GhCYP96K1_D	511	GPRICP	453	ETLRLYPP	373	1	i5-23o
Gh_D04G198100.1	D04	54051584	54053141	-	100	CYP714E35_D	GhCYP714E35_D	513	NYRHCP	489	ETLRLYPP	379	1	i13-32o
Gh_D04G198800.1	D04	54147320	54148621	-	99.79	CYP718A21_D	GhCYP718A21_D	484	GPRTCA	423	ECMRLFPP	351	1	i7-25o
Gh_D04G207600.1	D04	55165005	55168328	+	97.49	CYP724A1_D	GhCYP724A1_D	475	GPRLCP	412	ETLGFLKP	45	2	o4-26,i278-300o
Gh_D04G216200.1	D04	56047155	56050833	-	100	CYP94B69_D	GhCYP94B69_D	508	GPRICL	448	ESMRLYPP	364	1	i7-29o
Gh_D05G020300.1	D05	1767170	1770004	-	99.8	CYP94C83_D	GhCYP94C83_D	500	GFRVCL	441	ESMRLYPP	361	1	i13-35o
Gh_D05G035000.1	D05	2897292	2899212	+	100	CYP76A49_D	GhCYP76A49_D	512	GRRMCA	446	ETFRLHPP	368	2	o4-23,i69-91o
Gh_D05G044100.1	D05	3485116	3487553	-	100	CYP86B32_D	GhCYP86B32_D	547	GPRLCL	478	EALRLYPS	399	1	i23-45o
Gh_D05G066000.1	D05	5232715	5236716	+	99.82	CYP82C51_D	GhCYP82C51_D	549	GRRICP	484	ETLRLYPA	404	2	o38-57,i254-276o
Gh_D05G070500.1	D05	5622763	5624915	-	100	CYP82C52_D	GhCYP82C52_D	449	GRRICP	385	ETLRLYPA	305	0	o
Gh_D05G088100.1	D05	7420768	7422303	-	92.54	CYP82C140P_D	GhCYP82C140P_D	307	GPYWCN	127	ESRRFQKA	207	2	i7-26,o218-240i
Gh_D05G095800.1	D05	7952245	7954164	-	69.59	CYP82C138P_D	GhCYP82C138P_D	396	GRRICP	360	ETMRLYPA	280	2	o15-37,i170-192o
Gh_D05G108500.1	D05	9158012	9160637	+	88.93	CYP82C139P_D	GhCYP82C139P_D	241	GRRICP	201	ESNRFQKA	53	2	i65-87,o107-129i
Gh_D05G114600.1	D05	9750832	9753264	-	86.58	CYP78A190_D	GhCYP78A190_D	503	GRRVCP	436	EVLRLHPP	357	1	i27-49o
Gh_D05G134100.1	D05	11532098	11535885	-	100	CYP749A73_D	GhCYP749A73_D	513	GPRSCV	457	ETLRLYSP	378	1	i7-29o
Gh_D05G149400.1	D05	12955143	12956650	+	99.81	CYP734A56_D	GhCYP734A56_D	524	GVRTCI	457	ESLRLYPP	379	1	i7-29o
Gh_D05G149500.1	D05	12964347	12965855	+	100	CYP72D17_D	GhCYP72D17_D	501	GPRTCI	445	EVLRLYPP	367	1	i7-29o
Gh_D05G188400.1	D05	16536676	16537140	+	100	CYP711A55_D	GhCYP711A55_D	539	GPRACV	480	EAMRFYIV	402	1	i20-42o
Gh_D05G196100.1	D05	17214618	17216684	+	100	CYP714A29_D	GhCYP714A29_D	523	GTRLCL	467	EAMRLYPA	389	1	i7-29o
Gh_D05G196200.1	D05	17225817	17227970	+	100	CYP76AG4_D	GhCYP76AG4_D	527	GRRSCV	461	EVFRLHPG	383	1	o15-37i
Gh_D05G198800.1	D05	17384282	17385745	-	100	CYP86A129_D	GhCYP86A129_D	511	GPRTCL	452	ETLRLYPS	370	1	i7-24o
Gh_D05G198900.1	D05	17394930	17396743	-	100	CYP714F8_D	GhCYP714F8_D	512	GARVCP	456	EVLRLYPA	378	1	i7-29o
Gh_D05G199000.1	D05	17401496	17403406	-	99.63	CYP79D64_D	GhCYP79D64_D	566	GMRGCK	479	EAFRLHPI	398	1	i21-43o
Gh_D05G199100.1	D05	17442226	17443883	+	97.48	CYP716A120_D	GhCYP716A120_D	465	GPRMCP	410	EVMRLAPP	337	1	o4-23i
Gh_D05G199200.1	D05	17460148	17461883	-	99.59	CYP90D39_D	GhCYP90D39_D	483	GQRLCP	428	EALRMGNI	354	1	i7-26o
Gh_D05G199300.1	D05	17462494	17464318	-	96.61	CYP710A69_D	GhCYP710A69_D	486	GPHQCV	419	EVIRYQPP	343	2	o4-26,i67-86o
Gh_D05G199700.1	D05	17522625	17524284	+	100	CYP710A140_D	GhCYP710A140_D	502	GPHQCV	435	EVIRYRPP	359	3	i5-27,o37-54,i67-86o
Gh_D05G203800.1	D05	17840843	17843717	-	100	CYP83F68P_D	GhCYP83F68P_D	154	GRRICP	123	ETFRLQPT	45	0	o
Gh_D05G208400.1	D05	18323776	18326258	-	74.06	CYP721A96_D	GhCYP721A96_D	448	GFRFLP	229	ETLRLYSP	359	1	o4-26i
Gh_D05G262400.1	D05	24959560	24961806	+	97.62	CYP721A94_D	GhCYP721A94_D	505	GPRICV	447	ETLRLYSP	373	1	i7-29o
Gh_D05G262600.1	D05	24967473	24969775	-	95.87	CYP82D218_D	GhCYP82D218_D	397	GRRMCP	329	ETMRLYPA	249	0	o
Gh_D05G264700.1	D05	25184613	25186382	-	98.47	CYP82D113_D	GhCYP82D113_D	522	GRRSCP	457	ETLRMYPP	377	1	i7-24o
Gh_D05G295200.1	D05	31018740	31020350	-	100	CYP82D112_D	GhCYP82D112_D	522	GRRSCP	457	ETLRLYPP	377	2	o4-23i,227-246o
Gh_D05G313700.1	D05	36977779	36979783	-	93.5	CYP82D145_D	GhCYP82D145_D	506	GRRSCP	441	ETFRMYPP	361	1	i7-24o
Gh_D05G339700.1	D05	53155940	53157911	+	100	CYP82D146_D	GhCYP82D146_D	526	GRRLCP	462	ESLRLYPA	382	1	i7-29o
Gh_D05G340100.1	D05	53208544	53210446	+	99.81	CYP82C54_D	GhCYP82C54_D	525	GRRSCP	459	ETLRLYPA	379	2	o4-23i,225-244o
Gh_D05G340300.1	D05	53272310	53274296	+	96.95	CYP701A52_D	GhCYP701A52_D	383	GKRACA	325	ETLRKHSP	248	0	o
Gh_D05G340400.1	D05	53294282	53296161	+	100	CYP707A139_D	GhCYP707A139_D	471	GVHACP	413	ETLQLYSR	48	1	o4-21i
Gh_D05G378800.1	D05	60333429	60335074	-	99.61	CYP81T4_D	GhCYP81T4_D	518	GRRACP	450	ETMRLFPP	375	1	i7-26o
Gh_D05G378900.1	D05	60355875	60357683	-	100	CYP74A1_D	GhCYP74A1_D	523	GNKQCA	472	EALRIEPP	385	0	o
Gh_D05G379000.1	D05	60430332	60431979	-	100	CYP82D147_D	GhCYP82D147_D	526	GRRVCP	461	ETTRLYPA	381	1	i9-31o
Gh_D06G006300.1	D06	590589	596513	+	100	CYP81B89_D	GhCYP81B89_D	501	GRRRCP	433	ETFRMKPT	357	0	o
Gh_D06G011800.1	D06	1068719	1070416	+	100	CYP736A191_D	GhCYP736A191_D	502	GRRLCP	435	ETLRLHPI	356	1	i2-24o
Gh_D06G012400.1	D06	1158809	1160219	-	100	CYP82D109_D	GhCYP82D109_D	522	GRRSCP	457	ETLRMYPP	377	1	i7-24o
Gh_D06G012500.1	D06	1166110	1167375	-	99.8	CYP71BE72_D	GhCYP71BE72_D	508	GRRVCP	440	ETLRLHPV	362	1	i5-24o
Gh_D06G012600.1	D06	1170161	1177732	-	100	CYP71BE70a_D	GhCYP71BE70a_D	507	GRRICP	439	ETLRLHPV	361	1	i7-25o
Gh_D06G012700.1	D06	1184437	1187636	-	99.61	CYP71BE74_D	GhCYP71BE74_D	508	GRRVCP	440	ETLRLHPV	362	1	i7-26o
Gh_D06G012800.1	D06	1198820	1200527	-	97	CYP71BE70b_D	GhCYP71BE70b_D	434	GRRICP	366	ETLRLHPV	288	0	o
Gh_D06G012900.1	D06	1203913	1205633	-	88	CYP706Q1_D	GhCYP706Q1_D	388	GRRMCV	322	DLSRIYGP	80	1	i21-43o
Gh_D06G013100.1	D06	1248498	1250192	-	92.72	CYP706Q10_D	GhCYP706Q10_D	522	GRRMCV	456	ETLRLHPV	378	1	i21-43o
Gh_D06G013200.1	D06	1251990	1253986	-	87.55	CYP706Q3_D	GhCYP706Q3_D	505	GRRICV	439	ETLRLHPV	361	0	o
Gh_D06G013300.1	D06	1296990	1299189	-	100	CYP722A1_D	GhCYP722A1_D	498	GARTCL	438	ESLRMASV	364	1	i5-27o
Gh_D06G013400.1	D06	1301617	1302261	-	100	CYP74A60_D	GhCYP74A60_D	495	GYRILS	127	EAFRIEPP	357	0	o
Gh_D06G013500.1	D06	1309288	1312992	-	96.87	CYP82D148_D	GhCYP82D148_D	328	QVRKCA	141	ETMKCKEL	222	1	o10-32i
Gh_D06G013600.1	D06	1341424	1342840	-	85.33	CYP82D328P_D	GhCYP82D328P_D	184	AADMCE	150	ETLRLYSP	100	0	o
Gh_D06G013700.1	D06	1354932	1356590	-	85.79	CYP82D150_D	GhCYP82D150_D	531	GKRMCP	463	ETLRLYPP	383	1	i7-29o
Gh_D06G014300.1	D06	1406871	1409809	+	98.66	CYP82D219_D	GhCYP82D219_D	517	GRRMCL	452	ETLRLYPP	372	1	i7-29o
Gh_D06G022700.1	D06	2184064	2185645	-	98.12	CYP82D151_D	GhCYP82D151_D	521	GRRMCP	447	ETLRLYPA	367	1	i7-29o
Gh_D06G063900.1	D06	9097554	9100126	-	99.81	CYP82D220_D	GhCYP82D220_D	525	GRRMCP	457	ETLRLYPP	377	1	i7-29o
Gh_D06G085500.1	D06	14494943	14497032	-	97.71	CYP82D152a_D	GhCYP82D152a_D	514	GRRMCP	446	ETLRIYPA	366	1	i7-29o
Gh_D06G125800.1	D06	29827504	29829217	-	99	CYP82D321_D	GhCYP82D321_D	525	GRRMCP	457	ETLRLYPA	377	1	i7-29o
Gh_D06G161700.1	D06	51191877	51193388	-	100	CYP82D322_D	GhCYP82D322_D	532	GRRMCP	457	ETLRLYPP	377	1	i7-29o
Gh_D06G175500.1	D06	55756505	55758387	+	100	CYP82D323P_D	GhCYP82D323P_D	214	GKRIPN	206	GHLRLLGG	51	1	o10-29i
Gh_D06G187300.1	D06	57797117	57801077	-	99.82	CYP82D152b_D	GhCYP82D152b_D	593	GRRMCP	457	ETLRIYPA	377	1	i7-29o
Gh_D06G187300.2	D06	57797104	57800840	-	56.44	CYP82D324P_D	GhCYP82D324P_D	357	GKRIPN	181	QTLHLYPA	300	1	o10-32i
Gh_D06G193900.1	D06	59205571	59210117	+	100	CYP82D110_D	GhCYP82D110_D	521	GRRSCP	455	ETLRMYPP	375	1	i7-24o
Gh_D06G212900.1	D06	62104897	62108671	-	100	CYP701A18_D	GhCYP701A18_D	504	GKRACA	446	ETLRKHSP	369	1	i5-24o
Gh_D06G215700.1	D06	62504529	62508356	-	63.07	CYP81B177_D	GhCYP81B177_D	487	GRRGCP	419	ETLRMYPP	343	0	o
Gh_D06G243800.1	D06	65775221	65776741	+	89.46	CYP734A57_D	GhCYP734A57_D	502	GVRTCI	443	ESLRLYPP	366	1	i7-29o
Gh_D07G003100.1	D07	271965	274808	-	100	CYP92A133_D	GhCYP92A133_D	517	GRRMCP	448	ETMRKHPV	370	1	i7-29o
Gh_D07G045300.1	D07	4792073	4794387	+	99.82	CYP78A195_D	GhCYP78A195_D	544	GRRVCP	476	ETLRLHPP	392	1	i29-51o
Gh_D07G045300.2	D07	4792073	4794387	+	100	CYP710A70_D	GhCYP710A70_D	503	LSRRCP	490	EVVRYRPP	360	2	o4-26,i67-86o
Gh_D07G056300.1	D07	6104165	6111940	+	100	CYP77B26_D	GhCYP77B26_D	505	GRRICP	447	ETLRRHPP	365	0	o
Gh_D07G060800.1	D07	6616008	6619434	-	95.41	CYP88A77a_D	GhCYP88A77a_D	499	GSRLCP	439	ETLRLITF	366	1	i5-27o
Gh_D07G061000.1	D07	6646709	6649224	+	95.41	CYP88A77b_D	GhCYP88A77b_D	499	GSRLCP	439	ETLRLITF	366	1	i5-27o
Gh_D07G084900.1	D07	10038795	10040845	+	99.58	CYP90A46_D	GhCYP90A46_D	472	GPRLCP	417	ETLQLISA	43	1	i2-24o
Gh_D07G086000.1	D07	10292277	10295226	-	100	CYP727B4_D	GhCYP727B4_D	559	GARACV	498	ESARVMPA	389	1	i31-53o
Gh_D07G098600.1	D07	12157944	12161694	+	100	CYP728G3_D	GhCYP728G3_D	494	GPRVCA	438	ELMRVNPP	363	1	i20-42o
Gh_D07G098700.1	D07	12200175	12202283	+	100	CYP77B27_D	GhCYP77B27_D	506	GRRICP	448	ETFRRHPP	366	0	o
Gh_D07G098800.1	D07	12244159	12247101	+	100	CYP734A58_D	GhCYP734A58_D	518	GVRTCI	455	ESLRLYPP	377	1	i7-29o
Gh_D07G106300.1	D07	13663161	13667985	-	93.1	CYP704A127a_D	GhCYP704A127a_D	441	GPRICL	383	ETLRLYPA	303	2	o10-32,i230-252o
Gh_D07G109900.1	D07	14261740	14263284	+	90.89	CYP704A127b_D	GhCYP704A127b_D	381	KDNICA	274	ETLRLYPA	303	2	o10-32,i230-252o
Gh_D07G128700.1	D07	18590257	18592408	+	97.07	CYP87B28_D	GhCYP87B28_D	468	GNRTCA	412	ESLRLANV	337	1	i5-22o
Gh_D07G172100.1	D07	30947557	30949472	-	98.8	CYP71AH6_D	GhCYP71AH6_D	500	GRRGCP	438	ETLRLHPP	360	0	o
Gh_D07G197700.1	D07	47423014	47425805	-	97.81	CYP71AN47_D	GhCYP71AN47_D	492	GRRDCP	427	ETLRLHPP	349	1	i9-28o
Gh_D07G198900.1	D07	47703290	47705456	+	93.41	CYP81AT5_D	GhCYP81AT5_D	486	GRRACP	418	EAQRLYPA	344	1	i7-24o
Gh_D07G203200.1	D07	49267734	49275079	-	98.4	CYP85A1_D	GhCYP85A1_D	466	GTRQCP	412	ETSRLATI	338	1	i3-25o
Gh_D07G206400.1	D07	50133694	50135805	-	100	CYP82L15_D	GhCYP82L15_D	515	GRRSCP	448	ETLRLYPP	368	2	o4-21,i217-236o
Gh_D07G206500.1	D07	50211877	50212899	+	96.68	CYP82L16_D	GhCYP82L16_D	512	GRRSCP	439	ETLRLYPP	368	2	o4-21,i306-328o
Gh_D07G212700.1	D07	51942295	51944138	+	95.6	CYP82L17_D	GhCYP82L17_D	470	GRRSCP	424	ETLPMQDC	357	2	o4-21,i203-222o
Gh_D07G212800.1	D07	51976036	51977834	+	97.21	CYP707A143_D	GhCYP707A143_D	491	GVHSCP	434	ETLKFYTQ	69	1	o23-45i
Gh_D07G212900.1	D07	52201073	52202877	+	99.61	CYP86A130_D	GhCYP86A130_D	514	GPRTCL	455	ETLRLYPS	373	1	i7-26o
Gh_D07G228500.1	D07	54662458	54664284	+	100	CYP75A20_D	GhCYP75A20_D	510	GRRICA	443	ETFRKHPS	362	1	i7-26o
Gh_D07G233300.1	D07	55327966	55329489	+	97.36	CYP82J10_D	GhCYP82J10_D	517	GRRSCP	449	ETLRLYPP	369	0	o
Gh_D07G233400.1	D07	55337112	55338635	+	100	CYP85A41_D	GhCYP85A41_D	465	GTRQCP	411	ETSRLATI	337	1	i2-24o
Gh_D08G008000.1	D08	636002	637818	+	100	CYP714E36_D	GhCYP714E36_D	516	GPRVCL	460	ESLRLYPP	382	1	i7-29o
Gh_D08G013200.1	D08	1104298	1105878	-	100	CYP97B47_D	GhCYP97B47_D	579	GPRKCV	518	ESLRLYPQ	412	0	o
Gh_D08G018700.1	D08	1664736	1669802	+	100	CYP749A74_D	GhCYP749A74_D	519	GPRTCV	456	EALRLYPP	377	1	i7-29o
Gh_D08G121500.1	D08	40188932	40191174	+	100	CYP749A230P_D	GhCYP749A230P_D	290	GKLVLP	231	ETLRFYPP	209	0	o
Gh_D08G143500.1	D08	48140835	48143288	-	99.81	CYP79D117_D	GhCYP79D117_D	542	GRRGCP	474	EAFRLHPI	391	1	i5-27o
Gh_D08G148400.1	D08	49683020	49686217	+	100	CYP79D65_D	GhCYP79D65_D	542	GRRGCP	469	EAFRLHPV	386	1	i2-24o
Gh_D08G152600.1	D08	50487748	50489586	-	99.82	CYP79D66_D	GhCYP79D66_D	541	GRRGCP	468	EAFRLHPV	385	1	i2-24o
Gh_D08G170200.1	D08	54123859	54126412	-	100	CYP71BE75_D	GhCYP71BE75_D	505	GRRMCP	442	ETMRLHPP	364	1	o4-26i
Gh_D08G170200.2	D08	54123775	54126412	-	99.41	CYP94A72_D	GhCYP94A72_D	507	GPRLCL	445	ECMRLYPP	361	1	i7-24o
Gh_D08G170200.3	D08	54123973	54126412	-	99.8	CYP94A73_D	GhCYP94A73_D	507	GPRLCL	445	ECMRLYPP	361	1	i7-24o
Gh_D08G179700.1	D08	55948810	55951833	-	100	CYP94C85_D	GhCYP94C85_D	517	GLRVCL	458	ESLRLFPP	379	1	i20-42o
Gh_D08G180000.1	D08	56008157	56010578	-	99.06	CYP94F9_D	GhCYP94F9_D	526	GPRTCL	458	ESLRLFPP	377	2	o10-32,i316-338o
Gh_D08G190400.1	D08	57692719	57693620	-	100	CYP716A119_D	GhCYP716A119_D	480	GPRMCP	423	EVLRLAPP	350	1	i5-24o
Gh_D08G194400.1	D08	58799313	58800940	+	99.81	CYP78A196_D	GhCYP78A196_D	533	GRRTCP	473	EVLRLHPP	388	1	i26-48o
Gh_D08G196800.1	D08	59234756	59236341	+	100	CYP78A197_D	GhCYP78A197_D	537	GRRTCP	471	EVLRLHPP	388	1	i25-47o
Gh_D08G196900.1	D08	59249275	59251650	+	100	CYP704A128_D	GhCYP704A128_D	512	GPRICL	452	ETLRLYPA	373	1	i5-27o
Gh_D08G197000.1	D08	59253257	59255164	+	100	CYP86A132_D	GhCYP86A132_D	527	GPRICL	453	ETLRLYPS	372	1	i7-24o
Gh_D08G197100.1	D08	59268073	59269576	+	99.14	CYP707A141a_D	GhCYP707A141a_D	464	GTHSCP	410	ETFQLYSQ	48	1	o4-26i
Gh_D08G197300.1	D08	59343812	59345416	+	99.57	CYP707A141b_D	GhCYP707A141b_D	466	GTHSCP	410	ETFQLYSQ	48	1	o4-26i
Gh_D08G204900.1	D08	60533357	60534817	-	99.17	CYP707A141c_D	GhCYP707A141c_D	374	GKEKCG	311	ETFQLYSQ	48	1	o4-26i
Gh_D08G210500.1	D08	61304371	61305891	+	97.53	CYP88A81_D	GhCYP88A81_D	497	GSRICP	441	ITLPLTRP	478	1	i13-35o
Gh_D08G243400.1	D08	65486589	65488133	+	96.47	CYP88A79_D	GhCYP88A79_D	483	GSRICP	431	ETLRRASV	358	1	i2-24o
Gh_D08G258400.1	D08	66921804	66924770	-	89.87	CYP72A871P_D	GhCYP72A871P_D	237	GNMSLP	214	EVMRLYPS	193	0	o
Gh_D08G265200.1	D08	67502465	67505420	-	99.6	CYP706D9_D	GhCYP706D9_D	502	GRRMCA	436	ETLRLHPS	356	2	o4-23,i160-182o
Gh_D09G032200.1	D09	8440367	8440951	-	99.76	CYP76F89a_D	GhCYP76F89a_D	484	GRRICP	423	ETLRLHPP	345	1	i2-21o
Gh_D09G032400.1	D09	8464825	8466336	-	100	CYP76F90_D	GhCYP76F90_D	430	GRRICP	369	ETMRLHPS	291	0	o
Gh_D09G032600.1	D09	8555553	8557323	-	99.76	CYP76F89b_D	GhCYP76F89b_D	497	GRRICP	436	ETLRLHPP	358	1	i2-21o
Gh_D09G041700.1	D09	11737807	11739339	-	96.41	CYP76F91_D	GhCYP76F91_D	431	GRRICP	394	ETMRLHPP	331	1	i7-24o
Gh_D09G056100.1	D09	23278774	23280410	+	83	CYP76F167P_D	GhCYP76F167P_D	458	GRRICT	383	ETLRLHPP	305	1	i5-24o
Gh_D09G056200.1	D09	23409435	23411021	+	100	CYP86A131_D	GhCYP86A131_D	486	GPRICL	405	ETLRLYPS	324	0	o
Gh_D09G056300.1	D09	23529364	23531098	+	99.8	CYP94A74_D	GhCYP94A74_D	506	GPRICL	444	ESMRLYPP	360	1	i2-24o
Gh_D09G056400.1	D09	23597953	23599784	+	99.81	CYP89A153_D	GhCYP89A153_D	514	GRRICP	453	EGLRRHPP	368	0	o
Gh_D09G106600.1	D09	36209322	36211077	+	99.81	CYP72A506_D	GhCYP72A506_D	521	GPRICI	465	EVLRLYPP	386	1	i12-34o
Gh_D09G135900.1	D09	40333485	40335137	+	100	CYP734A59_D	GhCYP734A59_D	517	GVRTCI	461	ESLRLYPP	383	1	i12-34o
Gh_D09G136000.1	D09	40349824	40351483	+	100	CYP96A238P_D	GhCYP96A238P_D	194	GPRICL	138	EALRLYPP	58	0	o
Gh_D09G136100.1	D09	40360634	40362368	+	100	CYP96A131_D	GhCYP96A131_D	503	GPRKCL	445	EALRLYPP	365	1	i5-24o
Gh_D09G150600.1	D09	42252285	42253865	+	100	CYP96A235_D	GhCYP96A235_D	329	NKNGCP	3	CTERLESC	28	0	o
Gh_D09G191900.1	D09	46619458	46621516	+	100	CYP94B71_D	GhCYP94B71_D	510	GPRVCL	450	ESMRLYPP	365	1	i7-29o
Gh_D09G204500.1	D09	47707547	47709592	-	100	CYP736A193_D	GhCYP736A193_D	513	GRRGCP	446	EGLRLHPV	367	2	o5-22,i302-324o
Gh_D09G204600.1	D09	47723355	47725539	-	100	CYP736A333_D	GhCYP736A333_D	493	GRRVCP	431	ETLRLHPI	352	1	i7-24o
Gh_D09G204700.1	D09	47731144	47733177	-	83.88	CYP736A338_D	GhCYP736A338_D	490	SRRVCP	431	ETLRFYPV	352	1	i7-24o
Gh_D09G204800.1	D09	47742467	47742955	-	100	CYP736A196_D	GhCYP736A196_D	499	GRRLCP	437	EIFRLHPV	358	1	i5-27o
Gh_D09G209800.1	D09	48077672	48081598	+	100	CYP94C86_D	GhCYP94C86_D	499	GKRVCL	440	ESLRLFPP	361	1	i7-29o
Gh_D09G217800.1	D09	48855611	48857183	-	99.8	CYP712J4_D	GhCYP712J4_D	508	GRRVCA	444	ETLRLHSP	367	1	i7-28o
Gh_D09G217900.1	D09	48860182	48861754	-	100	CYP712C5_D	GhCYP712C5_D	512	GRRACP	447	EILRLHPP	370	1	i13-30o
Gh_D10G005800.1	D10	543799	546906	+	99.81	CYP93A89_D	GhCYP93A89_D	517	GRRSCP	450	ETLRLHPG	365	1	i7-26o
Gh_D10G014600.1	D10	1197161	1200241	-	100	CYP94C87_D	GhCYP94C87_D	526	GFRVCL	463	ESMRLYPP	383	1	i31-53o
Gh_D10G015100.1	D10	1228302	1229822	-	100	CYP715A39_D	GhCYP715A39_D	521	GGRMCV	465	EVLRLYSP	386	1	i13-35o
Gh_D10G056300.1	D10	5297221	5299491	-	100	CYP76F160_D	GhCYP76F160_D	500	GRRICP	439	ETFRMHPP	361	0	o
Gh_D10G056400.1	D10	5302757	5305280	-	99.6	CYP76F93_D	GhCYP76F93_D	500	GRRICP	439	ETFRMHPP	361	0	o
Gh_D10G095200.1	D10	11797943	11799490	-	84.23	CYP76F166_D	GhCYP76F166_D	500	GRRICP	439	ETFRMHPV	361	0	o
Gh_D10G108700.1	D10	15321895	15323623	-	78.26	CYP76F174P_A	GhCYP76F174P_A	98	TFRMHP	24	FAVSKFLR	45	0	o
Gh_D10G153000.1	D10	28261374	28263003	-	97.47	CYP88P1_D	GhCYP88P1_D	475	GSSTCP	419	ETLRIGAN	353	1	i5-22o
Gh_D10G153500.1	D10	28502947	28505371	+	99.6	CYP736A194_D	GhCYP736A194_D	499	GRRGCP	435	ESFRLHPV	357	1	i7-24o
Gh_D10G202000.1	D10	52843034	52845675	+	99.8	CYP736A195_D	GhCYP736A195_D	499	GRRGCP	435	ESFRLHPV	357	1	i7-24o
Gh_D10G204700.1	D10	53427368	53429241	-	100	CYP716C26_D	GhCYP716C26_D	486	GPRMCP	430	EVMRLTPP	356	1	i7-29o
Gh_D10G219200.1	D10	56722535	56724147	-	99.79	CYP728D32_D	GhCYP728D32_D	474	GARICP	417	ETLRMNPP	343	0	o
Gh_D10G219400.1	D10	56763721	56765113	-	100	CYP77B25_D	GhCYP77B25_D	506	GRRICP	447	ETFRRHPP	365	0	o
Gh_D10G219500.1	D10	56781068	56782529	+	100	CYP92A131_D	GhCYP92A131_D	510	GRRMCP	442	ETMRLHPV	364	1	i5-24o
Gh_D10G219700.1	D10	56796022	56797748	+	100	CYP92A132_D	GhCYP92A132_D	510	GRRKCP	442	EAMRLHPV	364	1	i7-26o
Gh_D10G221100.1	D10	57123194	57124766	+	99.8	CYP84A77_D	GhCYP84A77_D	515	GRRSCP	448	ETLRLHPP	370	1	i7-29o
Gh_D10G224100.1	D10	57521395	57522912	-	100	CYP96A132_D	GhCYP96A132_D	506	GPRICV	448	EALRLYPS	368	0	o
Gh_D10G225000.1	D10	57697918	57699781	+	100	CYP71AN53_D	GhCYP71AN53_D	508	GRRTCP	445	ETLRLHPP	366	1	i13-35o
Gh_D10G226400.1	D10	58107740	58109541	+	100	CYP749A16_D	GhCYP749A16_D	520	GPRACV	460	ETLRLYTP	381	1	i12-34o
Gh_D10G226600.1	D10	58154513	58156161	+	100	CYP73A26_D	GhCYP73A26_D	505	GRRSCP	443	ETLRLRMA	363	1	i5-24o
Gh_D10G226700.1	D10	58202464	58204209	+	100	CYP79A116_D	GhCYP79A116_D	555	GRRGCI	488	EAFRLHPS	407	1	i30-52o
Gh_D10G226800.1	D10	58225932	58227545	+	100	CYP83F44_D	GhCYP83F44_D	505	GRRVCP	442	ETFRLQTT	364	1	i2-21o
Gh_D10G226900.1	D10	58259136	58260753	-	76.55	CYP83F70P_D	GhCYP83F70P_D	383	GRRVCP	281	EVRDLFCP	251	0	o
Gh_D10G247500.1	D10	61506090	61508966	+	99.76	CYP83F62_D	GhCYP83F62_D	411	GRRVCP	348	ETFRLQPA	270	0	o
Gh_D10G256100.1	D10	62566437	62569166	+	100	CYP83F48_D	GhCYP83F48_D	510	GRRVCP	447	ETFRLQPV	369	1	i7-29o
Gh_D10G265700.1	D10	63704647	63707072	+	100	CYP94D66_D	GhCYP94D66_D	502	GPRMCL	445	ESLRLYPP	365	1	i5-27o
Gh_D10G265800.1	D10	63723148	63725807	+	100	CYP77A39_D	GhCYP77A39_D	505	GRRICP	443	ELLRRHPP	361	1	i5-22o
Gh_D10G265900.1	D10	63731877	63734394	+	100	CYP714E34_D	GhCYP714E34_D	510	GPRSCF	454	ETLRLYPL	376	1	i5-24o
Gh_D10G277900.1	D10	65122732	65127608	+	100	CYP71AN49_D	GhCYP71AN49_D	357	IRRACL	171	EMLMLVSS	185	1	o15-34i
Gh_D10G278700.1	D10	65198052	65200923	+	96.34	CYP71AN69_D	GhCYP71AN69_D	501	GRRNCP	437	ETLRLHPT	359	1	i21-40o
Gh_D11G007100.1	D11	684572	686229	-	100	CYP71AN50_D	GhCYP71AN50_D	507	GRRRCP	443	ETLRLHPA	365	1	i9-28o
Gh_D11G007200.1	D11	694791	695940	-	100	CYP71AN51_D	GhCYP71AN51_D	507	GRRRCP	443	ETLRLYPA	365	1	i9-28o
Gh_D11G007400.1	D11	708618	710290	-	94.87	CYP71AN52_D	GhCYP71AN52_D	486	GRKGCP	422	ETLRLHPV	355	1	i5-27o
Gh_D11G039300.1	D11	3193485	3193982	-	100	CYP706P1_D	GhCYP706P1_D	533	GRRICV	467	ETFRIHPP	387	1	i23-45o
Gh_D11G040500.1	D11	3255122	3256864	-	96.64	CYP83F50_D	GhCYP83F50_D	508	GRRVCP	445	ETFRLQPI	367	2	o13-32,i303-325o
Gh_D11G047300.1	D11	3825846	3828275	-	100	CYP81AZ1_D	GhCYP81AZ1_D	465	RRRACP	399	ETLRLNPA	325	0	o
Gh_D11G089300.1	D11	7369882	7371920	+	100	CYP81AZ3_D	GhCYP81AZ3_D	465	GRRGCP	399	ETLRLNPA	325	0	o
Gh_D11G089400.1	D11	7376093	7378169	+	100	CYP81AZ2_D	GhCYP81AZ2_D	497	GRRACP	431	ETLRLNPA	357	1	i7-25o
Gh_D11G089500.1	D11	7393500	7395560	+	100	CYP90A47_D	GhCYP90A47_D	473	GPRLCP	414	ETLQLIAA	44	1	i2-21o
Gh_D11G097200.1	D11	8074240	8075826	-	100	CYP71BG3_D	GhCYP71BG3_D	504	GRRGCP	440	EAMRLHPT	362	1	i9-26o
Gh_D11G107300.1	D11	9212164	9214304	+	100	CYP706Q8_D	GhCYP706Q8_D	521	GRRMCV	455	ETLRLHPV	377	1	i20-42o
Gh_D11G144300.1	D11	13883636	13886404	+	84.27	CYP706Q11P_D	GhCYP706Q11P_D	327	GPRYNR	143	ELIRTFAA	195	0	o
Gh_D11G149900.1	D11	14487751	14489830	-	100	CYP706Q6_D	GhCYP706Q6_D	532	GRRICV	466	ETLRLHPV	388	1	i23-45o
Gh_D11G157300.1	D11	15270167	15273500	+	100	CYP71AN71P_D	GhCYP71AN71P_D	165	GRRSCP	139	ETLRLHPV	61	0	o
Gh_D11G165300.1	D11	16633307	16642589	+	100	CYP94B70_D	GhCYP94B70_D	515	GPRVCL	456	ESMRLYPP	372	1	i5-27o
Gh_D11G174800.1	D11	18143613	18146642	+	100	CYP84A79_D	GhCYP84A79_D	517	GRRSCP	450	ETLRLHPP	372	1	i13-30o
Gh_D11G191800.1	D11	20999045	21001257	-	100	CYP704A129_D	GhCYP704A129_D	528	GPRICL	456	ETLRLYPV	377	1	i5-27o
Gh_D11G193000.1	D11	21346075	21349770	-	98.02	CYP704A264_D	GhCYP704A264_D	497	GPRVCL	437	ETIRLYPA	357	1	i7-26o
Gh_D11G197600.1	D11	22031071	22034756	-	90.12	CYP704A263_D	GhCYP704A263_D	474	GPRICL	414	ETLRLYPA	346	2	o4-26,i273-295o
Gh_D11G203300.1	D11	23200558	23202285	-	99.81	CYP86A133_D	GhCYP86A133_D	528	GPRICL	453	ETLRLYPS	372	1	i7-24o
Gh_D11G214100.1	D11	26607904	26609486	-	99.81	CYP78A198_D	GhCYP78A198_D	540	GRRTCP	474	EVLRLHPP	391	1	i25-47o
Gh_D11G242400.1	D11	40432212	40434096	-	99.61	CYP92A28_D	GhCYP92A28_D	511	GRRMCP	442	ETMRLHPV	364	1	i5-24o
Gh_D11G243700.1	D11	41759749	41761248	+	99.81	CYP82J11_D	GhCYP82J11_D	530	GRRSCP	462	ETFRLYPP	382	1	i7-29o
Gh_D11G249900.1	D11	47629338	47630992	+	99.59	CYP724B28_D	GhCYP724B28_D	493	GSRCCP	434	ISLPLYIP	218	1	i7-29o
Gh_D11G351200.1	D11	68727107	68728648	+	100	CYP74B25_D	GhCYP74B25_D	512	NTRVCA	152	ETLRMNPP	384	0	o
Gh_D11G351300.1	D11	68738402	68740502	+	100	CYP735A40_D	GhCYP735A40_D	522	GPRNCI	461	ESLRLYPP	386	1	i5-27o
Gh_D11G378600.1	D11	71942007	71943984	-	100	CYP84A78_D	GhCYP84A78_D	521	GRRSCP	454	ETLRLHPP	376	1	i9-31o
Gh_D11G379400.1	D11	71985406	71990166	-	100	CYP90C26_D	GhCYP90C26_D	491	GQRLCP	438	ETLRLANI	362	1	i2-23o
Gh_D12G025100.1	D12	3213056	3214590	-	100	CYP90B35_D	GhCYP90B35_D	485	GPRLCA	431	ETLRLGNV	346	1	i7-24o
Gh_D12G025300.1	D12	3245281	3246489	-	100	CYP82C96_D	GhCYP82C96_D	525	GRRSCP	459	ETLRLYPP	378	2	o4-26,i227-246o
Gh_D12G043400.1	D12	6204958	6213703	-	100	CYP81AT2_D	GhCYP81AT2_D	500	GRRACP	431	ETLRLYPA	356	1	i7-24o
Gh_D12G043600.1	D12	6229506	6231145	-	100	CYP96A133_D	GhCYP96A133_D	507	GPRTCL	449	EALRLYPP	369	0	o
Gh_D12G054900.1	D12	8953001	8954986	-	100	CYP96A130_D	GhCYP96A130_D	499	GPRTCL	441	EALRLYPP	361	0	o
Gh_D12G058200.1	D12	9829639	9831218	-	91.47	CYP73A286_D	GhCYP73A286_D	510	GRRSCP	433	ETLRLHTP	349	1	i13-35o
Gh_D12G064700.1	D12	11081800	11084115	+	99.81	CYP89A154_D	GhCYP89A154_D	513	GRRICP	453	EGLRRHPP	369	0	o
Gh_D12G096800.1	D12	29983582	29985843	+	99.8	CYP89A156_D	GhCYP89A156_D	512	GRRICP	452	EGLRRHPP	368	1	i5-24o
Gh_D12G101700.1	D12	31979706	31981265	+	99.61	CYP76G21_D	GhCYP76G21_D	513	GRRMCP	447	ETLRLHPP	368	1	i5-22o
Gh_D12G113900.1	D12	38475293	38477188	-	100	CYP97C38_D	GhCYP97C38_D	548	GPRKCV	482	ESLRLYPH	402	0	o
Gh_D12G129300.1	D12	41224830	41226855	-	92.56	CYP96K6_D	GhCYP96K6_D	499	GPRICP	441	ETLRLHPP	361	1	i5-27o
Gh_D12G131000.1	D12	41517719	41519622	+	86.34	CYP96K7P_D	GhCYP96K7P_D	370	GPRICP	312	ETLRLYPL	242	0	o
Gh_D12G157300.1	D12	46190907	46193346	+	91.21	CYP74A65_D	GhCYP74A65_D	461	GHRVCA	101	EYLRIDPP	335	0	o
Gh_D12G158300.1	D12	46452118	46455260	+	100	CYP82C59_D	GhCYP82C59_D	520	GRRICP	455	ETLRIKPP	375	2	o10-29,i223-245o
Gh_D12G164000.1	D12	47700338	47713304	+	100	CYP735A41_D	GhCYP735A41_D	519	GPRNCI	461	ESLRLYPP	386	1	i5-27o
Gh_D12G177700.1	D12	50134975	50136628	-	100	CYP81AT1_D	GhCYP81AT1_D	500	GRRSCP	434	ETLRLYPA	357	1	i7-24o
Gh_D12G181700.1	D12	50609347	50611610	+	99.8	CYP722C9_D	GhCYP722C9_D	489	GPRTCL	431	ETLRMANV	359	1	i12-34o
Gh_D12G197800.1	D12	52976674	52981132	+	99.8	CYP81BA2_D	GhCYP81BA2_D	504	GRRACP	437	ETLRLYPA	360	0	o
Gh_D12G202500.1	D12	53509462	53511181	-	100	CYP77A40_D	GhCYP77A40_D	519	GRRICP	456	EVLRKHPP	375	1	i13-35o
Gh_D12G202600.1	D12	53532001	53534005	+	100	CYP714E37_D	GhCYP714E37_D	522	GARICT	466	ETLRLYPP	388	1	i7-29o
Gh_D12G220400.1	D12	55502431	55504795	-	100	CYP703A26_D	GhCYP703A26_D	524	GKRKCP	456	ETFRMHPA	374	2	o4-21,i217-236o
Gh_D12G220400.2	D12	55502432	55504794	-	99.81	CYP78A199_D	GhCYP78A199_D	533	GRRTCP	471	EVLRLHPP	388	1	i26-48o
Gh_D12G220400.3	D12	55502870	55504794	-	100	CYP72A507_D	GhCYP72A507_D	514	GPRICV	454	EVMRLYPS	377	1	i7-25o
Gh_D12G223900.1	D12	55811203	55812771	-	100	CYP51G1_D	GhCYP51G1_D	486	GRHGCL	425	EALRLHPP	342	1	i7-29o
Gh_D12G224000.1	D12	55812883	55815996	-	100	CYP71AS19_D	GhCYP71AS19_D	515	GRRGCP	445	ETLRLHPP	367	2	o5-24,i302-324o
Gh_D12G240600.1	D12	57646625	57650440	+	75.68	CYP78A200_D	GhCYP78A200_D	482	GRRVCP	422	ETLRVHPP	344	2	o20-42,i49-71o
Gh_D12G245600.1	D12	58055792	58058107	+	99.63	CYP704B42_D	GhCYP704B42_D	534	GPRICL	476	ETLRLYPA	397	1	i7-29o
Gh_D12G249000.1	D12	58347007	58348997	-	100	CYP75B105_D	GhCYP75B105_D	510	GRRICA	443	ETFRLHPS	361	1	i2-21o
Gh_D12G259300.1	D12	59278608	59280851	-	100	CYP71AN54_D	GhCYP71AN54_D	509	GRRGCP	439	ETLRLHPA	361	2	o36-58,i214-236o
Gh_D12G277100.1	D12	60919965	60924606	-	100	CYP71BF13_D	GhCYP71BF13_D	542	GRRICP	479	ETLRLHPP	401	1	i37-59o
Gh_D12G279400.1	D12	61171108	61178326	-	99.57	CYP707A142b_D	GhCYP707A142b_D	463	GTHSCP	408	ETFHLYSQ	48	1	i5-27o
Gh_D12G284200.1	D12	61543793	61546441	+	93.89	CYP707A142c_D	GhCYP707A142c_D	491	GTHSCP	436	ETFHLYSQ	48	1	i5-27o
Gh_D12G284300.1	D12	61560675	61563539	+	99.77	CYP707A142a_D	GhCYP707A142a_D	434	GTHSCP	408	ETFHLYSQ	48	1	i5-27o
Gh_D12G284400.1	D12	61564919	61568294	+	95.39	CYP76Y17_D	GhCYP76Y17_D	487	GRRLCL	423	ETLRLHPA	345	0	o
Gh_D13G001000.1	D13	65759	69747	+	97.6	CYP76Y16_D	GhCYP76Y16_D	489	GRRICP	430	ETMRLHPA	352	0	o
Gh_D13G001000.2	D13	65759	69806	+	99.8	CYP706C46_D	GhCYP706C46_D	502	GRRICA	435	ESLRLHPV	357	1	i2-21o
Gh_D13G013300.1	D13	1136678	1139731	-	99.79	CYP87A55_D	GhCYP87A55_D	474	GMRFCV	416	ETLQFFTP	43	0	o
Gh_D13G024500.1	D13	2199325	2203621	-	99.81	CYP86A134_D	GhCYP86A134_D	527	GPRICL	453	ETLRLYPS	372	1	i5-27o
Gh_D13G031100.1	D13	2854175	2856143	-	100	CYP78A201_D	GhCYP78A201_D	530	GRRSCP	470	EVLRLHPP	386	1	i26-48o
Gh_D13G038800.1	D13	3890031	3892099	+	100	CYP715A40_D	GhCYP715A40_D	519	GGRMCV	463	EVLRLYSP	384	2	o10-32,i98-117o
Gh_D13G039000.1	D13	3970593	3972674	+	55.84	CYP87A96_D	GhCYP87A96_D	431	GVRLCA	391	ETIRLGNI	316	1	i5-22o
Gh_D13G039200.1	D13	4012318	4014214	+	92.38	CYP706P5P_D	GhCYP706P5P_D	338	GRRICI	303	ETLRIHPP	223	1	o306-328i
Gh_D13G039300.1	D13	4043117	4046156	+	99.81	CYP706P3_D	GhCYP706P3_D	531	GRRICV	465	ETLRIHPP	385	1	i20-42o
Gh_D13G039800.1	D13	4098230	4099047	+	100	CYP706P4_D	GhCYP706P4_D	524	GRRICV	458	ETLRIHPP	378	1	o15-37i
Gh_D13G042000.1	D13	4390738	4394016	-	99.8	CYP98A95b_D	GhCYP98A95b_D	510	GRRVCP	436	EALRLHPP	358	1	i2-24o
Gh_D13G067500.1	D13	8760248	8760613	+	100	CYP98A95a_D	GhCYP98A95a_D	509	GRRVCP	435	EALRLHPP	357	1	i2-24o
Gh_D13G069000.1	D13	9013317	9015632	+	88.89	CYP88A80_D	GhCYP88A80_D	367	GSRLCP	304	ETLRLVTF	231	0	o
Gh_D13G085900.1	D13	14660200	14661696	+	100	CYP736A197_D	GhCYP736A197_D	458	GRRGCP	394	ESLRLHPV	315	0	o
Gh_D13G091900.1	D13	16529945	16531584	+	98.9	CYP84A80_D	GhCYP84A80_D	544	GRRSCP	459	ETLRLHPP	381	1	i20-42o
Gh_D13G092300.1	D13	16619824	16622122	+	97.35	CYP749A202_D	GhCYP749A202_D	529	GPRSCV	469	ETLRLYPP	390	1	i16-38o
Gh_D13G094000.1	D13	17579863	17581737	-	96.6	CYP749A231_D	GhCYP749A231_D	529	GPRSCV	469	ETLRLYPP	390	1	i20-42o
Gh_D13G094100.1	D13	17672697	17674806	+	96.22	CYP749A232_D	GhCYP749A232_D	513	GSRSCV	453	ETLRLYPP	374	1	i16-38o
Gh_D13G094200.1	D13	17793102	17795224	+	97.16	CYP749A201_D	GhCYP749A201_D	529	GSRSCV	469	ETLRLYPP	390	1	i20-42o
Gh_D13G098600.1	D13	20043609	20046018	+	100	CYP736A348P_D	GhCYP736A348P_D	121	TLRLCP	14	ERLKRYYS	69	0	o
Gh_D13G100700.1	D13	21290775	21292328	+	98.74	CYP707A268_D	GhCYP707A268_D	476	GVHACP	416	ETLQLYSQ	50	1	i5-24o
Gh_D13G135300.1	D13	40763503	40765112	-	100	CYP86B95P_D	GhCYP86B95P_D	121	GPRLCL	64	KDCREYKP	34	0	o
Gh_D13G137100.1	D13	41381364	41382992	+	100	CYP749A76_D	GhCYP749A76_D	513	GPRTCV	456	ETLRLYPP	377	1	i7-29o
Gh_D13G140900.1	D13	43139356	43141632	-	100	CYP96Z1_D	GhCYP96Z1_D	498	GPRICL	440	ETLRLFPP	360	1	i5-24o
Gh_D13G153300.1	D13	47334481	47336331	+	100	CYP78A202_D	GhCYP78A202_D	518	GRRVCP	458	ETLRVHPP	379	2	o20-42,i49-71o
Gh_D13G154400.1	D13	47677728	47679344	-	100	CYP85A42_D	GhCYP85A42_D	466	GSRLCP	410	ETSRLATV	336	1	i2-24o
Gh_D13G154600.1	D13	47757022	47758078	-	100	CYP749A204_D	GhCYP749A204_D	519	GPRSCV	459	ETLRLYPP	380	1	i7-28o
Gh_D13G177900.1	D13	53082469	53088140	-	89.21	CYP749A233P_D	GhCYP749A233P_D	478	GPRTCV	415	EALRLYPP	336	1	i5-24o
Gh_D13G178500.1	D13	53245990	53247630	+	99.42	CYP749A77_D	GhCYP749A77_D	522	GPRSCV	466	ETLRLYPP	387	1	i5-27o
Gh_D13G229500.1	D13	60057326	60059001	+	100	CYP749A75_D	GhCYP749A75_D	519	GPRTCV	456	EALRLYPP	377	1	i7-29o
Gh_D13G266900.1	D13	63847498	63849934	+	99.81	CYP89A157_D	GhCYP89A157_D	517	GRRICP	457	EGLRRHPP	372	1	i5-27o
Probable pseudogene

## Sheet: Dataset S5
Supplementary Dataset 1 – Identification and characterization of CYP450 in Gossypium barbadense genome with haeme binding and ERR triad motif position.
GeneID	Chr	Start	End	Strand	CYP name	rename_for_variants	Protein length	Haeme Binding Motif	Motif Pos	ERR Triad Motif	ERR Triad Pos	TM helices	Topology
GB_A12G1663	A12	81156344	81158713	+	CYP51G1_A	GbCYP51G1_A	486	FGGGRHGC	422	EALRLHPP	342	1	i7-29o
GB_D12G1652	D12	44490940	44493337	+	CYP51G1_D	GbCYP51G1_D	486	FGGGRHGC	422	EVMRLYPS	377	1	i7-29o
GB_A03G1829	A03	98999745	99001781	+	CYP51G32_A	GbCYP51G32_A	486	FGGGRHGC	422	EALRLHPP	342	1	i7-29o
GB_D02G1984	D02	61663731	61665767	+	CYP51G32_D	GbCYP51G32_D	486	FGGGRHGC	422	EALRLHPP	342	1	i7-29o
GB_A06G0150	A06	1428320	1431365	+	CYP701A18_A	GbCYP701A18_A	502	FGAGKRVC	441	ETLRKHSP	367	1	i5-22o
GB_D06G0150	D06	1405252	1408184	+	CYP701A18_D	GbCYP701A18_D	504	FGSGRRSC	452	ETLRKHSP	369	1	i5-24o
GB_A05G2019	A05	19494156	19505712	+	CYP701A52_A	GbCYP701A52_A	514	FGAGKRAC	453	ETLRKHSP	379	1	i13-32o
GB_D05G2042	D05	17542296	17559288	+	CYP701A52_D	GbCYP701A52_D	495	FGSGRRSC	456	ETLRKHSP	360	1	i13-32o
GB_A12G1359	A12	74577926	74579906	-	CYP703A26_A	GbCYP703A26_A	521	FSAGKRKC	453	ETFRMHPA	374	2	o4-21,i217-236o
GB_D12G1352	D12	39479364	39481389	-	CYP703A26_D	GbCYP703A26_D	524	FSAGKRKC	453	ETLRLYPP	388	2	o4-21,i217-236o
GB_A07G0454	A07	5032198	5034524	+	CYP704A127_A	GbCYP704A127_A	560	FQAGPRIC	499	ETLRLYPA	422	0	o
GB_D07G0458	D07	4749486	4751811	+	CYP704A127_D	GbCYP704A127_D	559	FGLGVRTC	452	ETLRLYPA	421	2	o32-54,i59-81o
GB_A08G1625	A08	96801541	96804588	+	CYP704A128_A	GbCYP704A128_A	512	FHAGPRIC	449	ETLRLYPA	373	1	i5-27o
GB_D08G1626	D08	49259078	49262123	+	CYP704A128_D	GbCYP704A128_D	512	FGSGRRTC	468	ETLRLYPA	373	1	i5-27o
GB_A11G0865	A11	7731353	7733275	+	CYP704A129_A	GbCYP704A129_A	523	FHAGPRIC	455	ETLRLYPV	379	1	i7-29o
GB_D11G0895	D11	7215220	7217260	+	CYP704A129_D	GbCYP704A129_D	513	FHAGPRIC	438	ETLRLHPP	372	1	i5-27o
GB_A11G0867	A11	7785823	7787892	+	CYP704A263_A	GbCYP704A263_A	506	FQAGPRIC	443	ETLRLYPA	366	1	i7-26o
GB_D11G0897	D11	7238894	7240955	+	CYP704A263_D	GbCYP704A263_D	506	FQAGPRIC	443	ETIRLYPA	366	2	o4-26,i293-315o
GB_A11G0866	A11	7744258	7746336	+	CYP704A264_A	GbCYP704A264_A	506	FQAGPRVC	443	ETIRLYPA	366	1	i7-26o
GB_D11G0896	D11	7221505	7223582	+	CYP704A264_D	GbCYP704A264_D	506	FQAGPRVC	443	ETLRLYPV	362	1	i7-26o
GB_A12G1915	A12	87468364	87470629	+	CYP704B42_A	GbCYP704B42_A	534	FQAGPRIC	473	ETLRLYPA	397	1	i7-29o
GB_D12G1899	D12	48593392	48595655	+	CYP704B42_D	GbCYP704B42_D	534	FQAGPRIC	473	ETLRVHPP	380	1	i7-29o
GB_A03G0188	A03	2290965	2292676	-	CYP706B1_A	GbCYP706B1_A	536	FGSGRRMC	466	ETFRLHPP	389	1	i21-43o
GB_D03G1805	D03	51279956	51281657	+	CYP706B1_D	GbCYP706B1_D	536	FGSGRRKC	455	ETFRLHPP	389	1	i21-43o
GB_D03G1800	D03	51221908	51224728	+	CYP706B19_D	GbCYP706B19_D	532	FGGGLRFC	413	ETFRLHPA	386	1	i21-43o
GB_A03G0190	A03	2316329	2318226	+	CYP706B2_A	GbCYP706B2_A	524	FGAGRRKC	452	ETFRLHPV	375	1	i21-43o
GB_A03G0193	A03	2366555	2373146	-	CYP706B22_A	GbCYP706B22_A	481	FGSGRRRC	411	ETFRLHPP	334	0	o
GB_A03G0192	A03	2362150	2364990	-	CYP706B26_A	GbCYP706B26_A	532	FGSGRRKC	463	ETFRLHPA	386	1	i21-43o
GB_D03G1801	D03	51233456	51234475	+	CYP706B27_D	GbCYP706B27_D	276	FGSGRRKC	463	ETFRLHPP	209	0	o
GB_D03G1803	D03	51239604	51241267	-	CYP706B2a_D	GbCYP706B2a_D	527	SNANLNAC	3	ETFPLHPV	378	1	i21-43o
GB_D03G1804	D03	51273513	51275176	-	CYP706B2b_D	GbCYP706B2b_D	527	FGSERRKC	455	ETFRLHPV	378	1	i21-43o
GB_A03G0189	A03	2297968	2298552	+	CYP706B30P_A	GbCYP706B30P_A	194	FGSGRRKC	122	ETFRLHPV	45	0	o
GB_A12G2507	A12	96612662	96614649	+	CYP706C46_A	GbCYP706C46_A	502	FGSGRRIC	432	ESLRLHPV	357	1	i2-21o
GB_D12G2507	D12	55907580	55910919	+	CYP706C46_D	GbCYP706C46_D	502	FGSGRRIC	432	ETMRLHPA	352	1	i2-21o
GB_A08G2098	A08	110119945	110121168	+	CYP706D9_A	GbCYP706D9_A	407	FGSGRRMC	338	ETLRLHPS	261	0	o
GB_D08G2085	D08	58139155	58140782	+	CYP706D9_D	GbCYP706D9_D	502	FGAGSRIC	428	ETLRLHPS	356	2	o4-23,i160-182o
GB_A10G2519	A10	106612552	106615230	+	CYP706P1_A	GbCYP706P1_A	529	FGSGRRIC	460	ETFRIHPP	383	1	i19-41o
GB_D10G2488	D10	61332964	61335938	+	CYP706P1_D	GbCYP706P1_D	533	FGSGRRIC	464	ETFRIHPP	387	1	i23-45o
GB_A12G2946	A12	100455014	100461473	+	CYP706P2_A	GbCYP706P2_A	683	FGSGRRIC	462	ETLRIHPP	385	2	i20-42,o546-568i
GB_A12G2945	A12	100448382	100451475	+	CYP706P3_A	GbCYP706P3_A	520	FGSGRRIC	451	ETLRIHPP	374	0	o
GB_D12G2954	D12	59687393	59692912	+	CYP706P3_D	GbCYP706P3_D	834	FGSGRRIC	765	ETLRIHPP	223	1	i323-345o
GB_A12G2948	A12	100470181	100472448	+	CYP706P4_A	GbCYP706P4_A	320	SNNGLDAC	2	ETLRIHPP	223	0	o
GB_D12G2955	D12	59697296	59700068	+	CYP706P4_D	GbCYP706P4_D	524	FGSGRRIC	455	ETLRIHPP	688	2	o15-37,i49-68o
GB_A12G2947	A12	100461482	100463308	+	CYP706P6_A	GbCYP706P6_A	269	LGEGPKMA	122	ETLRIHPP	223	0	o
GB_D12G2953	D12	59673889	59687380	+	CYP706P7a_D	GbCYP706P7a_D	540	FGSGRRIC	300	EQSKIHGP	87	1	o388-410i
GB_D12G2952	D12	59673399	59673884	+	CYP706P7bP_D	GbCYP706P7bP_D	161	LQLGRKVC	98	ETIRLGNI	207	1	o20-42i
GB_A04G0207	A04	3000490	3091272	+	CYP706Q1_A	GbCYP706Q1_A	773	FGSGRRMC	695	ETLRLHPV	620	1	i21-43o
GB_D05G3890	D05	62537504	62539150	-	CYP706Q1_D	GbCYP706Q1_D	522	FGAGRRIC	437	ETLRLHPV	378	1	i21-43o
GB_D05G3891	D05	62560081	62561728	-	CYP706Q10_D	GbCYP706Q10_D	522	FGSGRRMC	453	ETLRLHPV	378	1	i21-43o
GB_A11G0076	A11	755456	757113	-	CYP706Q12_A	GbCYP706Q12_A	521	FGSGRRMC	452	ETLRLHPV	377	1	i20-42o
GB_D05G3895	D05	62710021	62711392	-	CYP706Q3a_D	GbCYP706Q3a_D	430	FGSGRRIC	326	ETLRLHPV	286	0	o
GB_D05G3892	D05	62619485	62620856	-	CYP706Q3b_D	GbCYP706Q3b_D	395	FGSGRRMC	453	ETLRLHPV	251	0	o
GB_A11G0077	A11	763061	764426	-	CYP706Q4_A	GbCYP706Q4_A	428	FGSGRRMC	360	ETLRLHPV	285	0	o
GB_D11G0077	D11	680179	681839	-	CYP706Q6_D	GbCYP706Q6_D	528	FGSGRRIC	459	ELIRTFAA	196	1	i23-45o
GB_A04G0204	A04	2951847	2953128	+	CYP706Q7_A	GbCYP706Q7_A	407	VIGGLIYC	399	ETLRLHPV	378	1	i21-43o
GB_D11G0075	D11	656153	657810	-	CYP706Q8_D	GbCYP706Q8_D	521	FGSGRRMC	452	ETLRLHPV	377	1	i20-42o
GB_A11G0078	A11	778987	780659	-	CYP706Q9_A	GbCYP706Q9_A	532	FGSGRRIC	463	ETLRLHPV	388	1	i23-45o
GB_A03G2216	A03	105181501	105185726	+	CYP707A138_A	GbCYP707A138_A	474	FGNGVHAC	410	ETLQLYSQ	47	1	i3-21o
GB_D02G2362	D02	66579804	66583709	+	CYP707A138_D	GbCYP707A138_D	473	FGNGVHAC	410	ETLQLYSE	47	0	o
GB_A05G2061	A05	19905074	19907948	-	CYP707A139_A	GbCYP707A139_A	471	FGSGVHAC	410	ETLQLYSR	48	1	o4-21i
GB_D05G2083	D05	17881673	17884550	-	CYP707A139_D	GbCYP707A139_D	471	FGAGKRAC	434	ETLQLYSR	48	1	o4-21i
GB_A08G1844	A08	103395649	103397800	-	CYP707A141_A	GbCYP707A141_A	466	FGNGTHSC	407	ETFQLYSQ	48	1	o4-26i
GB_D08G1846	D08	53675929	53678078	-	CYP707A141_D	GbCYP707A141_D	466	FNAGPRIC	450	ETFQLYSQ	48	1	o4-26i
GB_A12G2301	A12	94350183	94352190	-	CYP707A142_A	GbCYP707A142_A	463	FGNGTHSC	405	ETFHLYSQ	48	1	i5-27o
GB_D12G2305	D12	53917130	53919127	-	CYP707A142_D	GbCYP707A142_D	463	FGSGTHSC	405	ETLRLHPP	401	1	i5-27o
GB_A07G1078	A07	16950061	16954148	-	CYP707A143_A	GbCYP707A143_A	491	FGNGVHSC	431	ETLKFYTQ	70	1	o23-45i
GB_D07G1080	D07	13372726	13376851	-	CYP707A143_D	GbCYP707A143_D	491	FSSGRRSC	445	ETLKFYTQ	69	1	o23-45i
GB_A03G0547	A03	8179493	8182389	-	CYP707A144_A	GbCYP707A144_A	500	FGNGVHSC	440	ETLKLYKE	77	1	o30-52i
GB_D03G1429	D03	45873557	45876443	+	CYP707A144_D	GbCYP707A144_D	500	FGGGNRAC	415	ETLKLYKE	77	1	o30-52i
GB_A13G0401	A13	4769520	4772360	-	CYP707A268_A	GbCYP707A268_A	477	FGNGVHAC	414	ETLQLYSQ	50	1	i5-24o
GB_D13G0392	D13	3960703	3963530	-	CYP707A268_D	GbCYP707A268_D	476	FGNGVHAC	413	ETLRLHPP	377	1	i5-24o
GB_A05G1517	A05	14272758	14274266	+	CYP710A140_A	GbCYP710A140_A	502	FGAGAHQC	432	EVIRYRPP	359	1	i2-24o
GB_D05G4088	scaffold2855_obj_D05	809	2317	+	CYP710A140_D	GbCYP710A140_D	502	FGAGPHQC	438	EVIRYRPP	359	3	i5-27,o37-54,i67-86o
GB_A05G1518	A05	14315344	14316988	+	CYP710A69_A	GbCYP710A69_A	523	FGAGPHQC	453	EVIRYRPP	380	0	o
GB_D05G4087	scaffold27400_obj_D05	2802	4328	+	CYP710A69_D	GbCYP710A69_D	508	FGSGRRIC	361	EVIRYQPP	365	2	o4-26,i67-86o
GB_A06G1625	A06	99345787	99346644	-	CYP710A70_A	GbCYP710A70_A	269	FGAGPHKC	199	EVSRIWSP	112	0	o
GB_D06G1669	D06	48766638	48768107	-	CYP710A70a_D	GbCYP710A70a_D	465	FGAGRRVC	473	EVVRYRPP	336	1	i7-29o
GB_D06G1670	D06	48826695	48828206	-	CYP710A70b_D	GbCYP710A70b_D	503	FGAGPHQC	409	EVVRYRPP	360	2	o4-26,i67-86o
GB_A05G0425	A05	4160272	4163340	-	CYP711A55_A	GbCYP711A55_A	543	FGIGPRAC	481	EAMRFYIV	406	1	i20-42o
GB_D05G0426	D05	3617639	3620073	-	CYP711A55_D	GbCYP711A55_D	539	FSWGPRTC	458	EAMRFYIV	402	1	i20-42o
GB_A01G2226	A01	110641490	110643573	+	CYP712A11_A	GbCYP712A11_A	515	FGSGRRGC	450	ETLRLHPS	368	1	i12-29o
GB_D01G2310	D01	59641425	59643513	+	CYP712A11_D	GbCYP712A11_D	514	FGSGRRGC	449	ETLRLHPS	367	0	o
GB_A09G1540	A09	65757456	65759115	+	CYP712C5_A	GbCYP712C5_A	512	FGSGRRAC	444	ETLRLHPP	370	1	i13-30o
GB_D09G1375	D09	41665256	41666915	+	CYP712C5_D	GbCYP712C5_D	512	FGSGRRAC	444	EILRLHPP	370	1	i13-30o
GB_A09G1539	A09	65729387	65730431	+	CYP712C7_A	GbCYP712C7_A	318	FGRGRRGC	250	EILRLHPP	176	0	o
GB_D09G1374b	D09	41648954	41657727	+	CYP712C7_D	GbCYP712C7_D	408	FGSGRRVC	441			0	o
GB_A09G1538	A09	65726653	65728305	+	CYP712J4_A	GbCYP712J4_A	508	FGSGRRVC	441	ETLRLHSP	367	1	i7-28o
GB_D09G1374a	D09	41648954	41657727	+	CYP712J4_D	GbCYP712J4_D	488	FQAGKRVC	437	ETLRLHSP	367	1	i7-28o
GB_A05G0649	A05	6107981	6112263	+	CYP714A29_A	GbCYP714A29_A	523	FGLGTRLC	464	EAMRLYPA	389	1	i7-29o
GB_D05G0643	D05	5297997	5301815	+	CYP714A29_D	GbCYP714A29_D	523	FGIGPRAC	477	EAMRLYPA	389	1	i7-29o
GB_A05G4349	A05	106134912	106137799	-	CYP714A30_A	GbCYP714A30_A	519	FGVGSRLC	460	EALRLYPP	385	1	i7-29o
GB_D04G0117	D04	1405426	1408342	+	CYP714A30_D	GbCYP714A30_D	521	FGSGRRMC	466	EALRLYPP	387	1	i7-29o
GB_A10G2330	A10	102650538	102652401	+	CYP714E34_A	GbCYP714E34_A	510	FGTGPRSC	451	ETLRLYPL	376	1	i7-29o
GB_D10G2301	D10	57584383	57586246	+	CYP714E34_D	GbCYP714E34_D	510	FGTGPRSC	451	ETLRLYPL	376	1	i5-24o
GB_A05G4240	A05	104314650	104316581	+	CYP714E35_A	GbCYP714E35_A	513	FGFGPHTC	454	ETLRLYPP	379	1	i5-27o
GB_D04G0222	D04	2876722	2878651	-	CYP714E35_D	GbCYP714E35_D	513	FGVGSRLC	462	ETLRLYPP	379	1	i13-32o
GB_A07G2077	A07	79449609	79473174	+	CYP714E36_A	GbCYP714E36_A	480	FGVGPRVC	421	ESLRLYLP	346	1	i7-29o
GB_D07G2077	D07	46612675	46614646	+	CYP714E36_D	GbCYP714E36_D	516	FGSGRRSC	459	ESLRLYPP	382	1	i7-29o
GB_A12G1202	A12	71259787	71261677	-	CYP714E37_A	GbCYP714E37_A	522	FGIGARIC	463	ETLRLYPP	388	1	i7-29o
GB_D12G1184	D12	36687587	36689482	-	CYP714E37_D	GbCYP714E37_D	522	FGIGARIC	463	EETQHHPT	93	1	i7-29o
GB_A13G0174	A13	1761038	1765409	+	CYP714E79_A	GbCYP714E79_A	503	FGAGPHTC	444	ESLRLYSP	369	1	i7-29o
GB_A05G0988	A05	9090571	9091596	-	CYP714F8_A	GbCYP714F8_A	287	FGLGARVC	228	EVLRLYPA	153	0	o
GB_D05G0964	D05	8030788	8032708	-	CYP714F8_D	GbCYP714F8_D	512	FNAGPRTC	449	EVLRLYPA	378	1	i7-29o
GB_A09G2078	A09	72840619	72842661	+	CYP715A39_A	GbCYP715A39_A	521	FGFGGRMC	462	EVLRLYSP	386	1	i13-35o
GB_D09G1924	D09	47968988	47971035	+	CYP715A39_D	GbCYP715A39_D	521	FGFGGRMC	462	EVLRLYSP	386	1	i13-35o
GB_A12G2870	A12	99826841	99831569	-	CYP715A40_A	GbCYP715A40_A	519	FGFGGRMC	460	EVLRLYSP	384	2	o10-32,i98-117o
GB_D12G2878	D12	59108607	59113281	-	CYP715A40_D	GbCYP715A40_D	519	FGFGGRMC	460	EVLRLHPP	386	1	i13-35o
GB_A09G0577	A09	22157796	22164002	+	CYP715A41_A	GbCYP715A41_A	418	FGFGGRMC	392	EVLRLYSS	316	1	i13-35o
GB_A08G0184	A08	1582381	1587014	+	CYP716A119_A	GbCYP716A119_A	480	FGGGPRMC	420	EVLRLAPP	350	1	i5-24o
GB_D08G0183	D08	1525727	1530571	+	CYP716A119_D	GbCYP716A119_D	480	FHCGPRTC	455	EVLRLAPP	350	1	i5-24o
GB_A05G1175	A05	10885689	10888111	-	CYP716A120_A	GbCYP716A120_A	476	FGGGPRMC	418	EVMRLAPP	348	1	o4-23i
GB_D05G1158	D05	9782840	9785275	-	CYP716A120_D	GbCYP716A120_D	476	FSTGMRGC	476	EVMRLAPP	348	1	o4-23i
GB_A10G0056	A10	545009	547883	+	CYP716C26_A	GbCYP716C26_A	486	FGGGLRMC	427	EVMRLTPP	356	1	i7-29o
GB_D10G0056	D10	517565	520420	+	CYP716C26_D	GbCYP716C26_D	484	FGGGPRMC	425	EVMRLTPP	354	2	o6-28,i288-310o
GB_A13G1495	A13	85526315	85527452	-	CYP716E46_A	GbCYP716E46_A	319	FGGGPRMC	259	EVMRLAPP	189	0	o
GB_D13G1419	D13	38826764	38828412	-	CYP716E46_D	GbCYP716E46_D	489	FGGGPRMC	429	EVMRLAAP	359	1	i12-34o
GB_A13G1512	A13	86845312	86846954	+	CYP716E47_A	GbCYP716E47_A	487	FGGGPRMC	427	EVMRLAPP	357	1	i12-34o
GB_D13G1439	D13	39577584	39579230	+	CYP716E47_D	GbCYP716E47_D	489	FGGGPRMC	429	EVMRLAPP	359	1	i12-34o
GB_A05G4078	A05	101497028	101498639	+	CYP718A21_A	GbCYP718A21_A	484	FGGGPRTC	420	ECMRLFPP	351	1	i7-25o
GB_D04G0394	D04	5263635	5265246	-	CYP718A21_D	GbCYP718A21_D	484	FGFGPHTC	454	ECMRLFPP	351	1	i7-25o
GB_A07G0614	A07	7102583	7107584	-	CYP71AH43_A	GbCYP71AH43_A	341	IGNLHQLC	22	ETLRLHLP	303	0	o
GB_A07G0613	A07	7071716	7074248	-	CYP71AH6_A	GbCYP71AH6_A	374	VGNGRDKI	337	ETLRLHPP	361	2	o5-22,i64-86o
GB_D07G0618	D07	6556578	6559569	-	CYP71AH6_D	GbCYP71AH6_D	500	FGGGNRTC	424	ETLRLHPP	360	0	o
GB_A07G0616	A07	7139582	7141089	+	CYP71AN47_A	GbCYP71AN47_A	216	WRQVRKLC	37	ETLRLHPP	195	0	o
GB_D07G0622	D07	6587097	6589681	+	CYP71AN47_D	GbCYP71AN47_D	525	FGVGRRGC	435	ETLRLHPP	382	1	i32-51o
GB_D10G2310	D10	57927423	57928564	+	CYP71AN49_D	GbCYP71AN49_D	349	INKIRRAC	167	EILKDHDA	99	1	o15-34i
GB_A10G2336	A10	103058371	103067968	+	CYP71AN50_A	GbCYP71AN50_A	418	FGFGRRRC	351	ETLRLHPA	276	0	o
GB_D10G2312	D10	58009729	58011337	+	CYP71AN50_D	GbCYP71AN50_D	507	FGFGRRRC	440	ETLRLHPA	365	1	i9-28o
GB_D10G2313	D10	58033001	58034614	+	CYP71AN51_D	GbCYP71AN51_D	507	FGFGRRRC	440	ETLRLYPA	365	1	i9-28o
GB_A10G2337	A10	103137176	103138790	-	CYP71AN52_A	GbCYP71AN52_A	507	FGFGRKRC	440	ETLRLHPV	365	1	i5-27o
GB_D10G2314	D10	58057068	58058688	-	CYP71AN52_D	GbCYP71AN52_D	472	FGFGRKGC	405	ETLRLHPR	365	1	i5-27o
GB_A10G1422	A10	65412159	65413786	+	CYP71AN53_A	GbCYP71AN53_A	502	FGIGRRTC	436	ETLRLHPP	360	1	i13-35o
GB_D10G1520	D10	28005441	28007070	-	CYP71AN53_D	GbCYP71AN53_D	508	FGIGRRTC	442	ETLRLHPP	366	1	i13-35o
GB_D12G2130	D12	51862697	51863675	-	CYP71AN54_D	GbCYP71AN54_D	292	FGFGRRGC	219	ETFRLHPS	361	0	o
GB_A12G2136	A12	92003831	92005546	-	CYP71AN55_A	GbCYP71AN55_A	539	FGFGRRGC	466	ETLRLHPA	391	2	o36-58,i244-266o
GB_D12G2131	D12	51863754	51864416	-	CYP71AN55_D	GbCYP71AN55_D	220	WRQARKVC	160	ETLRLHPA	144	1	o36-58i
GB_D10G2311	D10	57967276	57968319	+	CYP71AN65_D	GbCYP71AN65_D	318	INKIRRAC	162	EILKDHDV	93	1	i9-28o
GB_A03G0896	A03	22121515	22127336	-	CYP71AN68_A	GbCYP71AN68_A	525	FGAGRRRC	449	ETLRLHAP	376	0	o
GB_D03G1187	D03	40514588	40516232	-	CYP71AN68_D	GbCYP71AN68_D	516	FGAGRRVC	449	ETLRLHAP	376	0	o
GB_A12G2134	A12	91998945	91999475	-	CYP71AN70P_A	GbCYP71AN70P_A	176	FGFGRRDV	136	ETLRLHPA	61	1	o149-171i
GB_A11G0385	A11	3425737	3426355	-	CYP71AN71P_A	GbCYP71AN71P_A	141	FLAGIDSS	22	ERFENNPI	103	0	o
GB_D11G0396	D11	3119470	3120671	-	CYP71AN71P_D	GbCYP71AN71P_D	335	FGVGRRSC	306	ETLRLHPV	384	0	o
GB_D13G2361	D13	57501518	57503193	+	CYP71AN72_D	GbCYP71AN72_D	528	FGFGRRAC	441	ETLRLHPA	365	2	o6-28,i214-233o
GB_A10G2338	A10	103146234	103155712	+	CYP71AN74P_A	GbCYP71AN74P_A	421	FDFGKRRC	369	ETLRLHPA	355	1	i13-30o
GB_A10G2335	A10	102906978	102908749	+	CYP71AN75_A	GbCYP71AN75_A	506	FGFGRRSC	439	ETLRLHPT	364	1	i9-28o
GB_A10G2339	A10	103161245	103162583	+	CYP71AN76P_A	GbCYP71AN76P_A	271	FGFGRRRC	204	KTLRLHPA	129	0	o
GB_A03G0899	A03	22173447	22174352	+	CYP71AP34_A	GbCYP71AP34_A	276	FGAGRRSC	210	ETWRLHPP	135	0	o
GB_D03G1189	D03	40540933	40542534	+	CYP71AP34_D	GbCYP71AP34_D	508	FGAGRRSC	442	ETWRLHPP	367	0	o
GB_A12G1725	A12	83186655	83194120	+	CYP71AS19_A	GbCYP71AS19_A	509	FGGGRRGC	441	ETLRLHPP	366	2	o5-24,i301-323o
GB_D12G1716	D12	45786118	45799096	+	CYP71AS19_D	GbCYP71AS19_D	515	FGGGRRGC	442	EALRLHPP	342	2	o5-24,i302-324o
GB_D02G1774	D02	56443882	56445163	-	CYP71AS20_D	GbCYP71AS20_D	396	FGGGRRIC	349	ETLRLHPP	274	0	o
GB_D02G1773	D02	56437349	56438122	+	CYP71AS23P_D	GbCYP71AS23P_D	183	FGAGRRIF	108	ELVRKPTA	43	1	i20-42o
GB_A01G0856	A01	13122311	13124031	-	CYP71BE154_A	GbCYP71BE154_A	499	FGAGRRIC	434	ETLRLHPP	359	1	i5-22o
GB_D01G0896	D01	11312914	11314664	-	CYP71BE154_D	GbCYP71BE154_D	509	FGAGRRIC	434	ETLRLHPP	359	1	i5-22o
GB_D13G1597	D13	45282296	45283888	+	CYP71BE155_D	GbCYP71BE155_D	503	FGAGRRIC	435	ETLRLHPI	360	1	i5-22o
GB_A01G0846	A01	12774812	12775766	-	CYP71BE165P_A	GbCYP71BE165P_A	287	FGAGRRIC	216	ETLRLHPP	142	0	o
GB_D01G0893	D01	11259118	11260729	-	CYP71BE165P_D	GbCYP71BE165P_D	505	FGAGRRIC	437	ETLRLHPP	363	1	i7-24o
GB_A04G0531	A04	11689355	11690409	-	CYP71BE170P_A	GbCYP71BE170P_A	320	FGAGRRKC	249	ETLRLYPI	179	0	o
GB_A13G1947	A13	101239286	101240690	+	CYP71BE171P_A	GbCYP71BE171P_A	306	FGAGRRIC	236	EVMITHGS	21	0	o
GB_D13G1615	D13	45701499	45702130	-	CYP71BE172P_D	GbCYP71BE172P_D	154	SGLKHRVE	54	ETLATAIE	121	0	o
GB_D01G0901	D01	11405225	11406155	+	CYP71BE174P_D	GbCYP71BE174P_D	235	YLSGMRAE	87	ITLRTAFA	43	0	o
GB_A01G0860	A01	13246815	13250253	-	CYP71BE177_A	GbCYP71BE177_A	510	FGAGRRMC	439	ETLRLHPP	364	1	i7-26o
GB_D01G0907	D01	11509458	11509820	-	CYP71BE177P_D	GbCYP71BE177P_D	120	FGAGMTMC	66	EAERFNPE	40	0	o
GB_A13G1949	A13	101309553	101311166	-	CYP71BE178_A	GbCYP71BE178_A	503	FGAGRRMC	437	ETLRLHPP	362	0	o
GB_D13G1889	D13	51302512	51304071	-	CYP71BE178P_D	GbCYP71BE178P_D	350	FGAGRRIC	282	EIMKTHDI	76	0	o
GB_A01G0857	A01	13172420	13174026	-	CYP71BE179_A	GbCYP71BE179_A	457	FGAGRRIC	405	ETLRLHPP	330	1	i7-26o
GB_D01G0900b	D01	11373456	11383369	-	CYP71BE179P_D	GbCYP71BE179P_D	394					1	i7-25o
GB_D13G1877	D13	51096649	51097678	-	CYP71BE181P_D	GbCYP71BE181P_D	287	LGSGFRVA	162	ESFRQEEV	124	0	o
GB_A01G0908	A01	14276726	14279235	-	CYP71BE182P_A	GbCYP71BE182P_A	381	FGAGRRRC	311	EVMKTHDT	74	0	o
GB_A01G0845	A01	12742266	12743873	-	CYP71BE64_A	GbCYP71BE64_A	511	FGAGRRIC	441	ETLRLHNP	367	1	i5-27o
GB_D01G0891	D01	11232396	11234003	-	CYP71BE64_D	GbCYP71BE64_D	511	FGAGRRIC	441	ETLRLHNP	367	1	i7-29o
GB_A01G0848	A01	12805227	12806955	-	CYP71BE65_A	GbCYP71BE65_A	502	FGGGRRMC	432	ETLRLHPP	357	0	o
GB_D01G0894	D01	11263875	11265621	-	CYP71BE65_D	GbCYP71BE65_D	508	FGAGRRMC	438	ETLRLHPP	363	1	i7-26o
GB_A01G0850	A01	12884785	12886417	-	CYP71BE66_A	GbCYP71BE66_A	502	FGAGRRMC	433	ETLRLHPP	358	1	i5-22o
GB_D01G0895	D01	11288960	11290592	-	CYP71BE66_D	GbCYP71BE66_D	502	FGAGRRMC	433	ETLRLHPP	358	1	i5-22o
GB_A01G0858	A01	13194592	13207196	-	CYP71BE68_A	GbCYP71BE68_A	516	FGAGGRIC	445	ETLRLHPP	370	1	i7-26o
GB_D01G0900a	D01	11373456	11383369	-	CYP71BE68a_D	GbCYP71BE68a_D	511	FGAGRRIC	437	ETLRLHPP	362	1	i7-26o
GB_D01G0906	D01	11464930	11466321	-	CYP71BE68bP_D	GbCYP71BE68bP_D	436	FGAGRRIC	365	ETLRLHPP	290	0	o
GB_A02G0046	A02	298367	299771	+	CYP71BE69_A	GbCYP71BE69_A	414	FGAGRRIC	345	ESIRLHPA	271	0	o
GB_D02G0058	D02	369033	370320	+	CYP71BE69_D	GbCYP71BE69_D	402	WRHLRKIC	123	ESIRLHPA	355	1	i2-21o
GB_A04G0532	A04	11724923	11726538	-	CYP71BE70_A	GbCYP71BE70_A	507	FGAGRRIC	436	ETLRLHPV	361	1	i7-25o
GB_A04G0533	A04	11758701	11760319	-	CYP71BE71_A	GbCYP71BE71_A	508	FGAGRRVC	437	ETLRLHPV	362	1	i7-26o
GB_D05G3553	D05	53283941	53307539	+	CYP71BE72_D	GbCYP71BE72_D	508	FGSGRRSC	454	ETLRLHPV	362	1	i5-24o
GB_A04G0534	A04	11774503	11776122	-	CYP71BE74_A	GbCYP71BE74_A	464	FGAGRRVC	393	ETLRLHPV	318	1	i7-26o
GB_A07G2422	A07	90984490	90986099	+	CYP71BE75_A	GbCYP71BE75_A	509	FGAGRRMC	439	ETMRLHPP	364	1	o4-26i
GB_D07G2391	D07	52954876	52956473	+	CYP71BE75_D	GbCYP71BE75_D	505	FGRGRRGC	483	ETMRLHPP	364	1	o4-26i
GB_A13G1564	A13	90496511	90498113	+	CYP71BE76_A	GbCYP71BE76_A	508	FGAGKRIC	437	ETLRLHPP	362	1	i5-22o
GB_A13G1675	A13	94348289	94349909	+	CYP71BE77_A	GbCYP71BE77_A	512	FGAGRRIC	435	ETLRLHPI	360	1	i5-22o
GB_D13G1613	D13	45622235	45623851	-	CYP71BE78_D	GbCYP71BE78_D	500	FGAGRRIC	432	ETLRLHPV	357	1	i7-26o
GB_A13G1782	A13	94861129	94862759	+	CYP71BE79_A	GbCYP71BE79_A	508	FGAGRRMC	437	ETFRIRPS	362	0	o
GB_D13G1619	D13	45873773	45885328	+	CYP71BE79_D	GbCYP71BE79_D	639	FGAGRRMC	437	ETFRIRPS	362	0	o
GB_A13G1948	A13	101273955	101275657	-	CYP71BE80_A	GbCYP71BE80_A	519	FGAGRRIC	446	ETMRLHPP	371	1	o10-32i
GB_D13G1878	D13	51121814	51123485	+	CYP71BE80_D	GbCYP71BE80_D	509	FGAGRRIC	439	ETMRLHPP	364	1	o4-26i
GB_A12G2137	A12	92039872	92041632	+	CYP71BF13_A	GbCYP71BF13_A	541	FSSGRTCP	476	ETLRLHPP	401	1	i37-59o
GB_D12G2132	D12	51884818	51886583	+	CYP71BF13_D	GbCYP71BF13_D	542	FGSGRRIC	476	EIVKNHDV	123	1	i37-59o
GB_A12G2186	A12	92619305	92620906	-	CYP71BF17P_A	GbCYP71BF17P_A	488	GGFVRESC	477	ETLRLYPP	395	1	i38-60o
GB_A10G2786	A10	110862252	110864076	+	CYP71BG3_A	GbCYP71BG3_A	502	FGGGRRGC	435	EAMRLHPT	360	1	i9-26o
GB_D10G2746	D10	66069426	66072145	+	CYP71BG3_D	GbCYP71BG3_D	504	FGGGRRGC	437	EAMRLHPT	362	1	i9-26o
GB_A01G1161	A01	24749259	24758218	+	CYP721A90_A	GbCYP721A90_A	496	YGLGPRFC	435	ETLRLYPP	364	1	i5-27o
GB_D01G1253	D01	19329273	19333291	+	CYP721A90_D	GbCYP721A90_D	504	YGLGPRFC	443	ETLRLYPP	372	1	i5-27o
GB_A05G1981	A05	19027760	19029902	+	CYP721A94_A	GbCYP721A94_A	505	FGLGSRIC	444	ETLRLYSP	373	1	i7-29o
GB_D05G2009	D05	17258578	17260731	+	CYP721A94_D	GbCYP721A94_D	505	FGSKPRLG	96	ETLRLYSP	373	1	i7-29o
GB_A05G1980	A05	19021941	19023845	+	CYP721A96_A	GbCYP721A96_A	452	FGSKPRLG	96	ETLRLYSP	373	1	o4-26i
GB_D05G2008	D05	17247377	17249230	+	CYP721A96_D	GbCYP721A96_D	420	FGAGRRIC	120	ETLRLYSP	359	1	o4-26i
GB_A06G0080	A06	736509	742362	+	CYP722A1_A	GbCYP722A1_A	500	FGMGARTC	438	ESLRMASV	367	1	i5-27o
GB_D06G0082	D06	706137	711885	+	CYP722A1_D	GbCYP722A1_D	467	FGAGPHQC	432	ESLRMASV	333	0	o
GB_A12G0654	A12	14199968	14202292	+	CYP722C9_A	GbCYP722C9_A	491	FGAGPRTC	428	ETLRMANV	359	0	o
GB_D12G0642	D12	10714827	10717148	+	CYP722C9_D	GbCYP722C9_D	491	FGAGPRTC	428	ETLRLYPA	357	1	i12-34o
GB_A05G3834	A05	95936303	95938881	+	CYP724A1_A	GbCYP724A1_A	438	FGGGPRLC	372	ETLGFLKP	8	0	o
GB_D04G0631	D04	9561175	9563757	-	CYP724A1_D	GbCYP724A1_D	438	FGGGPRTC	420	ETLGFLKP	8	0	o
GB_A11G1542	A11	17209128	17212436	+	CYP724B28_A	GbCYP724B28_A	490	FGGGSRCC	428	ETFSFLKP	52	1	i7-29o
GB_D11G1579	D11	14870347	14873680	+	CYP724B28_D	GbCYP724B28_D	493	FGGGSRCC	431	FTIRLGRS	75	1	i7-29o
GB_A06G2064	A06	114258744	114261862	-	CYP727B4_A	GbCYP727B4_A	559	FGSGARAC	495	ESARVMPA	389	1	i31-53o
GB_D06G2164	D06	59133232	59136289	-	CYP727B4_D	GbCYP727B4_D	559	FGGGPRLC	414	ESARVMPA	389	1	i31-53o
GB_A01G0757	A01	11446277	11447865	-	CYP728B54_A	GbCYP728B54_A	427	FGGGPRIC	366	ETLRMFPP	295	0	o
GB_D01G0796	D01	10032039	10033774	-	CYP728B54_D	GbCYP728B54_D	474	FGGGPRIC	413	ETLRMFPP	342	0	o
GB_A10G0137	A10	1201882	1205493	-	CYP728D32_A	GbCYP728D32_A	486	FGGGARIC	414	ETLRMNPP	343	0	o
GB_A06G2090	A06	114756131	114759739	-	CYP728G3_A	GbCYP728G3_A	494	FGAGPRVC	435	ELMRVNPP	363	1	i20-42o
GB_D06G2197	D06	59558587	59562417	-	CYP728G3_D	GbCYP728G3_D	494	FGSGARAC	495	ELMRVNPP	363	1	i20-42o
GB_A01G0387	A01	4026540	4027409	+	CYP72A502_A	GbCYP72A502_A	260	FGWGPRIC	198	EVLRLYPP	123	0	o
GB_D01G0412	D01	4017891	4019774	+	CYP72A502a_D	GbCYP72A502a_D	518	FGWGPRIC	456	EVLRLYPP	381	1	i5-24o
GB_D01G0413	D01	4033991	4035438	+	CYP72A502bP_D	GbCYP72A502bP_D	345	FEEGKRIF	120	EVLRLYPP	282	0	o
GB_A01G0388	A01	4031409	4033293	+	CYP72A503_A	GbCYP72A503_A	518	FGWGPRIC	456	EVLRLYPP	381	1	i13-32o
GB_A01G0390	A01	4051980	4053865	+	CYP72A504_A	GbCYP72A504_A	518	FGWGPRIC	456	EVLRLYPS	381	1	i13-32o
GB_D01G0415	D01	4043995	4047133	+	CYP72A504_D	GbCYP72A504_D	570	FGWGPRIC	456	EVLRLYPS	381	1	i13-32o
GB_A08G2777	A08	118972200	118974860	-	CYP72A506_A	GbCYP72A506_A	521	FGGGPRIC	462	EVLRLYPP	386	1	i12-34o
GB_D08G2763	D08	65968220	65970882	-	CYP72A506_D	GbCYP72A506_D	521	FGVGRRIC	450	EVLRLYPP	386	1	i12-34o
GB_A12G1650	A12	80575925	80578376	+	CYP72A507_A	GbCYP72A507_A	514	FGWGPRIC	451	EVMRLYPS	377	1	i7-25o
GB_D12G1643	D12	44246030	44248468	+	CYP72A507_D	GbCYP72A507_D	514	FGWGPRIC	451	EVLRLHPP	388	1	i7-25o
GB_D01G0416	D01	4050412	4052388	+	CYP72A848_D	GbCYP72A848_D	518	FGWGPRIC	456	EVLRLYPA	381	1	i5-27o
GB_A01G0389	A01	4042678	4043539	+	CYP72A872P_A	GbCYP72A872P_A	258	FGWGPRIC	196	EVLRLYPS	121	0	o
GB_A05G0336	A05	3458988	3460915	+	CYP72D17_A	GbCYP72D17_A	553	FGWGPRTC	494	EVLRLYPP	419	1	i7-29o
GB_D05G0337	D05	3035824	3037745	+	CYP72D17_D	GbCYP72D17_D	517	FGLGVRTC	454	EVLRLYPP	383	1	i7-29o
GB_A02G0690	A02	10544058	10546592	+	CYP733A1_A	GbCYP733A1_A	477	FGSGPRMC	419	ETLRRATI	350	1	i5-27o
GB_D02G0734	D02	9677671	9680106	-	CYP733A1a_D	GbCYP733A1a_D	438	FGSGPRMC	380	ETLRRATI	311	0	o
GB_D02G0737	D02	9693240	9695764	+	CYP733A1b_D	GbCYP733A1b_D	477	FGSGPRMC	419	ETLRRATI	350	1	i5-27o
GB_A05G0191	A05	1872659	1875443	-	CYP734A56_A	GbCYP734A56_A	524	FGLGVRTC	454	ESLRLYPP	379	1	i7-29o
GB_D05G0199	D05	1840469	1843307	-	CYP734A56_D	GbCYP734A56_D	524	FSMGPRSC	964	ESLRLYPP	379	1	i7-29o
GB_A06G0640	A06	10806399	10808966	-	CYP734A57_A	GbCYP734A57_A	515	FGLGVRTC	453	ESLRLYPP	378	1	i7-29o
GB_D06G0630	D06	8457785	8460352	-	CYP734A57_D	GbCYP734A57_D	515	FGARRRGC	429	ESLRLYPP	378	1	i7-29o
GB_A07G0018	A07	204608	206117	-	CYP734A58_A	GbCYP734A58_A	370	WGHHRKTI	151	ENLKLLVP	165	1	i7-29o
GB_D07G0023	D07	247394	250240	-	CYP734A58_D	GbCYP734A58_D	518	FGAGRRIC	445	ESLRLYPP	377	1	i7-29o
GB_A08G2841	A08	119516624	119519896	-	CYP734A59_A	GbCYP734A59_A	517	FGLGVRTC	458	ESLRLYPP	383	1	i12-34o
GB_D08G2831	D08	66566276	66569321	-	CYP734A59_D	GbCYP734A59_D	517	FGGGPRIC	462	ESLRLYPP	383	1	i12-34o
GB_A11G1703	A11	20825585	20828414	+	CYP735A40_A	GbCYP735A40_A	522	FAAGPRNC	458	ESLRLYPP	386	1	i12-34o
GB_D11G1754	D11	17769114	17772259	+	CYP735A40_D	GbCYP735A40_D	522	FAAGPRNC	458	ETLRMNPP	384	1	i5-27o
GB_A12G0557	A12	11434409	11436395	-	CYP735A41_A	GbCYP735A41_A	519	FAAGPRNC	458	ESLRLYPP	386	1	i5-27o
GB_D12G0550	D12	8561683	8563670	-	CYP735A41_D	GbCYP735A41_D	519	FAAGPRNC	458	ETLRIKPP	315	1	i5-27o
GB_D01G0640	D01	7213247	7215071	-	CYP736A189a_D	GbCYP736A189a_D	519	FGTGRRGC	452	ESFRLHPA	376	1	i13-35o
GB_D01G0641	D01	7244569	7246393	-	CYP736A189b_D	GbCYP736A189b_D	519	FGTGRRGC	452	ESFRLHPA	376	1	i13-35o
GB_A01G0611	A01	7668410	7679650	-	CYP736A190_A	GbCYP736A190_A	519	FGTGRRGC	452	ESFRLHPV	376	1	i13-35o
GB_D01G0639	D01	7181901	7183726	-	CYP736A190_D	GbCYP736A190_D	519	FGTGRRGC	452	ESFRLHPV	376	1	i13-35o
GB_A05G3008	A05	36935036	36936648	-	CYP736A191_A	GbCYP736A191_A	502	FGAGRRLC	432	ETLRLHPI	356	1	i2-24o
GB_D05G2991	D05	30578015	30579473	-	CYP736A191_D	GbCYP736A191_D	451	FGEGRKDG	227	ETLRLHPI	305	0	o
GB_A09G0221	A09	4445991	4446488	-	CYP736A192_A-C-term	GbCYP736A192_A-C-term	165	FGAGRRRC	98	ESLRLHPV	22	0	o
GB_A09G0222	A09	4446503	4449301	-	CYP736A192_A-N-term	GbCYP736A192_A-N-term	339	FEAIREGC	239	ESLRLTGH	210	1	o5-24i
GB_A09G0697	A09	37479715	37481301	-	CYP736A193_A	GbCYP736A193_A	493	FGSGRRVC	428	ETLRLHPV	352	1	i7-25o
GB_D09G0593	D09	25081283	25082919	+	CYP736A193_D	GbCYP736A193_D	513	FQAGPRVC	447	EGLRLHPV	367	2	o5-22,i302-324o
GB_A09G2336	A09	75199086	75200655	-	CYP736A194_A	GbCYP736A194_A	499	FGAGRRGC	432	ESFRLHPV	357	1	i7-24o
GB_D09G2185	D09	50195419	50196991	-	CYP736A194_D	GbCYP736A194_D	499	FGAGRRGC	432	ESFRLHPV	357	1	i7-24o
GB_A09G2337	A09	75203560	75205132	-	CYP736A195_A	GbCYP736A195_A	499	FGAGRRGC	432	ESFRLHPV	357	1	i7-24o
GB_D09G2186	D09	50210980	50217691	-	CYP736A195_D	GbCYP736A195_D	397	WRNMRKMC	124	ESFRLHPV	355	1	i7-24o
GB_A09G0725	A09	39938049	39939647	+	CYP736A196_A	GbCYP736A196_A	497	FGAGRRLC	432	EIFRLHPV	356	1	i5-27o
GB_D09G0597	D09	25427336	25428940	+	CYP736A196_D	GbCYP736A196_D	499	FGSGRRVC	428	EIFRLHPV	358	1	i5-27o
GB_A13G0238	A13	2497764	2501722	-	CYP736A197_A	GbCYP736A197_A	507	FGSGRRGC	440	ESLRLHPV	364	1	i2-24o
GB_D13G0228	D13	1980650	1984682	-	CYP736A197_D	GbCYP736A197_D	458	FGSGRRGC	391	ETLRLVTF	304	0	o
GB_A13G0240	A13	2535935	2538594	-	CYP736A198_A	GbCYP736A198_A	507	FGSGRRGC	440	ESLRLHPV	364	1	i2-24o
GB_D01G0642	D01	7277680	7279502	-	CYP736A331_D	GbCYP736A331_D	501	FGTGRRGC	434	ESFRLHPV	358	1	i13-35o
GB_D09G0594	D09	25206597	25208183	+	CYP736A333_D	GbCYP736A333_D	493	FGSGRRGC	443	ETLRLHPI	352	1	i7-24o
GB_D09G0595	D09	25341269	25342855	+	CYP736A338_D	GbCYP736A338_D	493	FGSGRRVC	428	ETLRLYPV	352	1	i7-24o
GB_A09G0219	A09	4431253	4431687	-	CYP736A339P_A	GbCYP736A339P_A	144	VGRNRLVE	87	EGLRLHPV	110	1	i45-67o
GB_A09G0723	A09	39781628	39782593	+	CYP736A340P_A	GbCYP736A340P_A	278	FGSGRRVC	213	ETLKLYPV	137	0	o
GB_A05G3007	A05	36827101	36828699	-	CYP736A342_A	GbCYP736A342_A	497	FGAGRRLC	432	ETLRLHPV	356	1	i5-27o
GB_A13G0235	A13	2471139	2475577	-	CYP736A344_A	GbCYP736A344_A	504	FGSGRRGC	440	ESLRLHPV	364	1	i2-24o
GB_D09G0818	D09	32965905	32966501	-	CYP736A354_D-C-term	GbCYP736A354_D-C-term	198	FGAGRRLC	434	ETLRLYPV	72	0	o
GB_D09G0819	D09	32966565	32967446	-	CYP736A354_D-N-term	GbCYP736A354_D-N-term	258	FGSGCRVC	133	ESLKEAAA	159	1	i7-24o
GB_A01G0612	A01	7702821	7703084	-	CYP736A356_A	GbCYP736A356_A	87	FGTGHRRC	65	TSMRLILA	80	0	o
GB_A13G2786	A13	112895752	112897912	+	CYP73A25_A	GbCYP73A25_A	505	FGVGRRSC	440	ETLRLRMA	363	0	o
GB_D13G2721	D13	61213180	61215305	+	CYP73A25_D	GbCYP73A25_D	505	FGVGRRSC	440	ETLRLRMA	363	0	o
GB_A10G2068	A10	96006140	96008380	+	CYP73A26_A	GbCYP73A26_A	505	FGVGRRSC	440	ETLRLRMA	363	1	i5-24o
GB_D10G2061	D10	52848858	52851138	+	CYP73A26_D	GbCYP73A26_D	505	FGVGRRSC	440	ETLRLRMA	363	1	i5-24o
GB_A11G2500	A11	80010966	80012564	-	CYP73A286_A	GbCYP73A286_A	532	FGVGRRSC	467	ETLRLHTP	386	1	i13-35o
GB_D11G2539	D11	47648919	47649632	+	CYP73A286P_D	GbCYP73A286P_D	237	FGVGRRSC	157	EALRLYPP	331	0	o
GB_D10G1523	D10	28258304	28260236	+	CYP749A16_D	GbCYP749A16_D	520	FGMGPRAC	457	ETLRLYTP	381	1	i12-34o
GB_A02G0252	A02	2825266	2827139	+	CYP749A193_A	GbCYP749A193_A	516	FGLGPRNC	453	ETLRLYGP	377	1	i7-29o
GB_D02G0292	D02	3658748	3660618	+	CYP749A194_D	GbCYP749A194_D	516	FGLGPRNC	453	ETLRLYGP	377	1	i7-29o
GB_D02G0291b	D02	3574977	3642756	+	CYP749A198_D	GbCYP749A198_D	518					1	i7-29o
GB_D02G0291a	D02	3574977	3642756	+	CYP749A199_D	GbCYP749A199_D	515	FGLGPRTC	1486	ETLRLYGP	373	1	i3-25o
GB_A13G0896	A13	25663260	25663694	+	CYP749A204_A-C-term	GbCYP749A204_A-C-term	144	FGLGPRSC	81	ETLRLYPP	5	0	o
GB_A13G0888	A13	24621768	24623328	+	CYP749A204_A-N-term	GbCYP749A204_A-N-term	414	TAAMRREA	61	ETLRLYPP	380	1	i7-29o
GB_D13G0921	D13	16494591	16496465	-	CYP749A204_D	GbCYP749A204_D	519	FGIGPRTC	177	ETLRLYPP	380	1	i7-28o
GB_D07G2182	D07	48702624	48704601	+	CYP749A204P_D	GbCYP749A204P_D	347	FGIGPRTC	451	ETLRLYPP	266	0	o
GB_A13G0383	A13	4382084	4477689	+	CYP749A205_A	GbCYP749A205_A	529	FGLGPRSC	466	ETLRLYPP	390	1	i20-42o
GB_D02G0282	D02	3361768	3372448	+	CYP749A207_D	GbCYP749A207_D	785	FGLGPRFC	722	ETLRLYGA	646	0	o
GB_A13G0632	A13	12265182	12266702	-	CYP749A212_A	GbCYP749A212_A	372	FIASLGLC	8	ETLRLYPP	353	1	i7-29o
GB_D02G0291c	D02	3574977	3642756	+	CYP749A220_D	GbCYP749A220_D	516					1	i7-29o
GB_D02G0286	D02	3458244	3459506	+	CYP749A228a_D	GbCYP749A228a_D	349	FGLGPRSC	286	EALRLYDP	210	0	o
GB_D02G0289	D02	3478973	3479804	+	CYP749A228bP_D	GbCYP749A228bP_D	250	FGLGPRSC	187	ETLRLYGP	111	0	o
GB_D13G0922	D13	16577700	16578531	+	CYP749A233P_D	GbCYP749A233P_D	243	FGLGPRSC	463	EALRLYPP	101	0	o
GB_A13G0627	A13	11994650	11996678	-	CYP749A234_A	GbCYP749A234_A	488	FRLEPRFC	428	ETLRLYPP	352	1	i2-24o
GB_D10G1527	D10	28301626	28302324	+	CYP749A350P_D	GbCYP749A350P_D	193	FGMGPRAC	134	ETLRLYAP	58	1	o10-32i
GB_A02G0249	A02	2605788	2607822	+	CYP749A351_A	GbCYP749A351_A	511	FGLGPRSC	449	ETLRLYSP	373	1	i5-27o
GB_D02G0247	D02	2777931	2778705	-	CYP749A351P_D	GbCYP749A351P_D	236	TGSGPRSC	184	NYLRLYGP	113	0	o
GB_D02G0284	D02	3394886	3397474	+	CYP749A65_D	GbCYP749A65_D	515	FGLGPRSC	452	ETLRLYGP	376	1	i7-29o
GB_A02G0250	A02	2683381	2724621	+	CYP749A66_A	GbCYP749A66_A	1024	FGLGPRSC	453	ETLRLYGP	377	3	i7-29,o317-339,i516-538o
GB_D02G0285	D02	3416054	3443956	+	CYP749A66_D	GbCYP749A66_D	516	FGLGPRSC	453	ETLRLYGP	377	1	i7-29o
GB_A02G0251	A02	2730212	2732644	+	CYP749A68_A	GbCYP749A68_A	518	FGLGPRSC	456	ETLRLYGP	380	1	i11-33o
GB_D02G0293	D02	3674558	3676967	+	CYP749A68_D	GbCYP749A68_D	511	FGLGPRSC	449	ETLRLYGP	373	1	i3-25o
GB_A02G0253	A02	2839776	2842620	+	CYP749A70_A	GbCYP749A70_A	500	FGLGPRNC	437	ETLRLYGP	361	0	o
GB_D02G0283	D02	3375505	3383012	+	CYP749A71_D	GbCYP749A71_D	1021	FGLGPRFC	449	ETLRLYGP	373	3	i3-25,o313-335,i512-534o
GB_scaffold20650_objG0001	scaffold20650_obj	18	2043	+	CYP749A72_D	GbCYP749A72_D	512	FGLGPRSC	449	ETLRLYGP	373	1	i3-25o
GB_D04G2185	D04	57120684	57128175	-	CYP749A73_D	GbCYP749A73_D	1023	FGSGRRVC	478	ETLRLYSP	888	1	i7-29o
GB_A04G1794	A04	81720351	81724540	-	CYP749A73a_A	GbCYP749A73a_A	513	FSMGPRSC	454	ETLRLYSP	378	1	i7-29o
GB_A04G1795	A04	81726484	81730706	-	CYP749A73b_A	GbCYP749A73b_A	513	FSMGPRSC	454	ETLRLYSP	378	1	i7-29o
GB_D07G2181	D07	48647889	48649993	-	CYP749A74_D	GbCYP749A74_D	517	FGGGPRKC	515	EALRLYPP	375	1	i7-29o
GB_A13G1197	A13	58140109	58142528	+	CYP749A75_A	GbCYP749A75_A	520	FGFGPRTC	454	EALRLYPP	378	1	i7-29o
GB_D13G0967	D13	18761656	18762875	+	CYP749A75_D	GbCYP749A75_D	352	FGVGRRIC	454	EALRLYPP	210	0	o
GB_A13G0631	A13	12250601	12253039	-	CYP749A76_A	GbCYP749A76_A	513	FGLGPRTC	453	ETLRLYPP	377	1	i7-29o
GB_D13G0657	D13	8318842	8321028	+	CYP749A76_D	GbCYP749A76_D	513	FSAGPRIC	437	ETLRLYPP	377	1	i7-29o
GB_A13G0891	A13	25303953	25304381	-	CYP749A77_A	GbCYP749A77_A	142	FGLGPRSC	83	ETLRLYPP	7	0	o
GB_D13G0923	D13	16687924	16699183	+	CYP749A77_D	GbCYP749A77_D	527	FGFGPRTC	286	ETLRLYPP	387	1	i5-27o
GB_A05G2654	A05	28110850	28112421	+	CYP74A1_A	GbCYP74A1_A	523	LTGGYRIL	152	EALRIEPP	385	0	o
GB_D05G2654	D05	24707401	24708972	+	CYP74A1_D	GbCYP74A1_D	523	FGTGRRRC	351	EALRIEPP	385	0	o
GB_A06G0128	A06	1147896	1149383	+	CYP74A60_A	GbCYP74A60_A	495	FGAAITIK	481	EAFRIEPP	357	0	o
GB_D06G0133	D06	1166454	1167941	+	CYP74A60_D	GbCYP74A60_D	495	FGMGARTC	404	EAFRIEPP	357	0	o
GB_A11G1617	A11	18991863	19002504	+	CYP74B25_A	GbCYP74B25_A	512	YTGNTRVC	149	ETLRMNPP	384	0	o
GB_D11G1666	D11	16246897	16255782	+	CYP74B25_D	GbCYP74B25_D	512	YTGNTRVC	149	ETFSFLKP	52	0	o
GB_A07G1309	A07	23701633	23732417	+	CYP75A20_A	GbCYP75A20_A	510	FGAGRRIC	440	ETFRKHPS	362	1	i7-26o
GB_D07G1307	D07	18181173	18182786	+	CYP75A20_D	GbCYP75A20_D	510	FNAGPRTC	452	ETFRKHPS	362	1	i7-26o
GB_A12G2097	A12	91508638	91512680	+	CYP75B105_A	GbCYP75B105_A	510	FGAGRRIC	440	ETFRLHPS	361	1	i5-22o
GB_D12G2090	D12	51341095	51345266	+	CYP75B105_D	GbCYP75B105_D	510	FGAGRRIC	440	ETLRLYPA	397	1	i2-21o
GB_D09G1556	D09	43904143	43905867	-	CYP76A125_D	GbCYP76A125_D	514	FGSGRRIC	445	ETLRLHPV	370	1	i5-22o
GB_A09G1649	A09	67530057	67530674	+	CYP76A125P_A-C-term	GbCYP76A125P_A-C-term	146	IGTQRKVE	38	ETLRLYPV	61	0	o
GB_A09G1719	A09	68516375	68516743	-	CYP76A125P_A-N-term	GbCYP76A125P_A-N-term	122	HDFCDRKC	97	QTLHKLKP	57	1	o4-23i
GB_A04G0874	A04	55373843	55375338	-	CYP76A126_A	GbCYP76A126_A	459	FGAGRRMC	390	ETFRLHPP	315	0	o
GB_A04G0873	A04	55323166	55324777	-	CYP76A49_ A	GbCYP76A49_A	512	FGAGRRMC	443	ETFRLHPP	368	2	o4-23,i69-91o
GB_D04G1233	D04	38938714	38940328	-	CYP76A49_D	GbCYP76A49_D	512	FQGGFRVC	438	ETFRLHPP	368	2	o4-23,i69-91o
GB_A05G0695	A05	6509563	6511160	-	CYP76AG4_A	GbCYP76AG4_A	481	FGTGRRSC	412	EVFRLHPG	337	0	o
GB_D05G0686	D05	5659162	5660897	-	CYP76AG4_D	GbCYP76AG4_D	527	FGLGTRLC	464	EVFRLHPG	383	1	o15-37i
GB_A08G2131	A08	110774799	110776365	+	CYP76F159_A	GbCYP76F159_A	496	FGGGRRIC	432	ETLRLHPP	357	0	o
GB_A09G2206	A09	74023575	74025044	-	CYP76F166_A	GbCYP76F166_A	307	FGAGRRIC	244	ETVRMHPV	169	0	o
GB_D09G2053	D09	49097633	49099666	-	CYP76F166_D	GbCYP76F166_D	500	FGAGRRIC	436	ETFRMHPV	361	0	o
GB_D08G2109	D08	58535032	58535879	+	CYP76F168P_D	GbCYP76F168P_D	233	FGSGRRMC	433	ESIEISTV	50	0	o
GB_A09G2207	A09	74025098	74025619	-	CYP76F170_A	GbCYP76F170_A	173	FRNGRKSS	24	EYLRQNKI	148	1	o5-24i
GB_A09G2208	A09	74038626	74040211	-	CYP76F171_A	GbCYP76F171_A	464	FGAGRRIC	400	ETFRMHPA	325	0	o
GB_A09G2209	A09	74045738	74046705	-	CYP76F171P_A	GbCYP76F171P_A	258	FGAGRRIC	194	ETFRMHPA	119	0	o
GB_A09G2210	A09	74054265	74055136	-	CYP76F172P_A	GbCYP76F172P_A	226	FGAGRRIC	162	ETFRMHPA	87	0	o
GB_A09G2214	A09	74075641	74075901	-	CYP76F177P_A	GbCYP76F177P_A	86	FGAGRRIW	22	IAVQMVEP	71	0	o
GB_D08G2110	D08	58563102	58564688	-	CYP76F89_D	GbCYP76F89_D	497	QGIRRRMA	115	ETLRLHPP	358	1	i2-21o
GB_A08G2123	A08	110644302	110645871	+	CYP76F89a_A	GbCYP76F89a_A	494	FGGGRRIC	430	ETLRLHPP	355	0	o
GB_A08G2125	A08	110683064	110684016	+	CYP76F89bP_A	GbCYP76F89bP_A	301	FQASRKLT	19	EILQTQDA	86	1	i2-21o
GB_A08G2126	A08	110707035	110707977	+	CYP76F90_A	GbCYP76F90_A	287	FGGGRRIC	223	ETMRLHPS	148	0	o
GB_A08G2127	A08	110721021	110721882	+	CYP76F91_A	GbCYP76F91_A	261	FGSGRRIC	197	ETMRLHPP	122	0	o
GB_D08G2111	D08	58584616	58586121	+	CYP76F91_D	GbCYP76F91_D	476	FGAGRRIC	433	ETMRLHPP	361	1	i7-24o
GB_D08G2112	D08	58662995	58664186	+	CYP76F92_D	GbCYP76F92_D	371	FGSGRRIC	436	EIFQKHDA	88	1	o4-23i
GB_D09G2052	D09	49090150	49092003	-	CYP76F93_D	GbCYP76F93_D	500	FGAGRRIC	436	ETFRMHPP	361	0	o
GB_A11G3758	A11	115600593	115602560	-	CYP76G21_A	GbCYP76G21_A	513	FGSGRRMC	444	ETLRLHPP	368	1	i5-22o
GB_D11G3777	D11	71688716	71690688	-	CYP76G21_D	GbCYP76G21_D	513	FGSGRRMC	444	EGLRRHPP	369	1	i5-22o
GB_A12G2337	A12	94629452	94632813	-	CYP76Y16_A	GbCYP76Y16_A	488	FGAGRRIC	426	ETMRLHPA	351	0	o
GB_D12G2344	D12	54215762	54218574	-	CYP76Y16_D	GbCYP76Y16_D	489	FGAGRRIC	427	ETLRLHPA	357	0	o
GB_A12G2336	A12	94627553	94629123	-	CYP76Y17_A	GbCYP76Y17_A	499	FGAGRRLC	432	ETLRLHPA	357	0	o
GB_D12G2343	D12	54213863	54215433	-	CYP76Y17_D	GbCYP76Y17_D	499	FGAGRRLC	432	ETFHLYSQ	48	0	o
GB_A10G2317	A10	102352800	102354317	-	CYP77A39_A	GbCYP77A39_A	505	FGVGRRIC	440	ELLRRHPP	361	1	i5-22o
GB_D10G2294	D10	57397071	57398588	-	CYP77A39_D	GbCYP77A39_D	505	FGVGRRIC	440	ELLRRHPP	361	1	i2-21o
GB_A12G1068	A12	50846501	50848060	+	CYP77A40_A	GbCYP77A40_A	519	FGAGRRIC	453	EVLRKHPP	375	1	i13-35o
GB_D12G1052	D12	30337903	30339201	+	CYP77A40_D	GbCYP77A40_D	432	FGAGRRIC	366	ETLRLYPA	360	0	o
GB_D12G1054	D12	30464385	30465869	-	CYP77A81P_D	GbCYP77A81P_D	238	FGAGTRIC	172	EVLRKHPP	288	1	i35-57o
GB_A10G0142	A10	1244027	1245878	-	CYP77B25_A	GbCYP77B25_A	512	FGAGRRIC	444	ETFRRHPP	365	0	o
GB_D10G0144	D10	1167951	1171284	-	CYP77B25_D	GbCYP77B25_D	523	FGAGRRIC	444	ETFRRHPP	365	0	o
GB_A06G1754	A06	107071803	107073320	+	CYP77B26_A	GbCYP77B26_A	505	FGAGRRIC	444	ETLRRHPP	365	0	o
GB_D06G1811	D06	53248182	53249699	+	CYP77B26_D	GbCYP77B26_D	505	FGAGPHQC	433	ETLRRHPP	365	0	o
GB_D06G2461	D06	62411461	62412981	+	CYP77B27_D	GbCYP77B27_D	506	FGAGPRVC	435	ETFRRHPP	366	0	o
GB_A06G2362	A06	117762086	117768503	+	CYP77B27P_A	GbCYP77B27P_A	401	FGAGRRIC	340	ETFRRHPS	261	1	i7-24o
GB_A04G1727	A04	81077392	81080691	+	CYP78A190_A	GbCYP78A190_A	549	FGSGRRVC	479	EVLRLHPP	403	1	i29-51o
GB_D04G2119	D04	56337081	56340411	+	CYP78A190_D	GbCYP78A190_D	548	FGAGRRIC	248	EVLRLHPP	402	1	i27-49o
GB_A01G1857	A01	100358014	100360572	-	CYP78A191_A	GbCYP78A191_A	377	FPGVKRRC	258	ESARLLMF	137	2	o4-22,i29-51o
GB_D01G1866	D01	49120728	49123794	-	CYP78A191_D	GbCYP78A191_D	508	FGSGRRVC	441	EVLRMHPP	365	2	o4-22,i29-51o
GB_A03G1281	A03	64512348	64514008	+	CYP78A192_A	GbCYP78A192_A	518	FGSGRRVC	455	ETLRVHPP	379	2	o20-42,i49-71o
GB_D02G1462	D02	44065385	44067042	+	CYP78A192_D	GbCYP78A192_D	518	FGSGRRVC	455	ETLRVHPP	379	2	o20-42,i49-71o
GB_A02G1631	A02	94267395	94269106	-	CYP78A193_A	GbCYP78A193_A	537	FGAGRRVC	469	ETLRIHPP	392	1	i29-51o
GB_D03G0469	D03	6500121	6501832	-	CYP78A193_D	GbCYP78A193_D	537	FGAGRRVC	469	ETLRIHPP	392	1	i29-51o
GB_A02G1103	A02	43290439	43292731	-	CYP78A194_A	GbCYP78A194_A	530	FGSGRRAC	466	EVLRLHPP	384	1	i26-48o
GB_D03G0985	D03	34442165	34444506	+	CYP78A194_D	GbCYP78A194_D	530	FGSGRRAC	466	EVLRLHPP	384	1	i26-48o
GB_A06G1300	A06	63980819	63982532	+	CYP78A195_A	GbCYP78A195_A	544	FGAGRRVC	473	ETLRLHPP	392	1	i29-51o
GB_D06G1303	D06	28474916	28476629	-	CYP78A195_D	GbCYP78A195_D	544	WRQGRKIY	126	ETLRLHPP	392	1	i29-51o
GB_A08G1344	A08	77147816	77305484	-	CYP78A196_A	GbCYP78A196_A	341	FDAKRLMA	66	ETEQLNQL	201	0	o
GB_D08G1334	D08	39642614	39644395	+	CYP78A196_D	GbCYP78A196_D	533	FGGGPRMC	420	EVLRLHPP	388	1	i26-48o
GB_A08G1570	A08	94004295	94006067	-	CYP78A197_A	GbCYP78A197_A	537	FGSGRRTC	468	EVLRLHPP	388	1	i24-46o
GB_D08G1574	D08	47701229	47702995	-	CYP78A197_D	GbCYP78A197_D	537	FGSGRRTC	470	EVLRLHPP	388	1	i25-47o
GB_A11G1048	A11	9765755	9767589	+	CYP78A198_A	GbCYP78A198_A	540	FGSGRRTC	471	EVLRLHPP	391	1	i25-47o
GB_D11G1078	D11	9007157	9008984	+	CYP78A198_D	GbCYP78A198_D	540	FGSGRRTC	471	ETLRLYPS	372	1	i25-47o
GB_A12G1374	A12	74951431	74953111	+	CYP78A199_A	GbCYP78A199_A	533	FGSGRRTC	468	EVLRLHPP	388	1	i26-48o
GB_D12G1370	D12	39743126	39744810	+	CYP78A199_D	GbCYP78A199_D	533	FGSGRRTC	468	ETFRMHPA	374	1	i26-48o
GB_A12G1877	A12	86943071	86944729	-	CYP78A200_A	GbCYP78A200_A	519	FGSGRRVC	456	ETLRVHPP	380	2	o20-42,i49-71o
GB_D12G1858	D12	48123008	48124663	-	CYP78A200_D	GbCYP78A200_D	518	FGSGRRVC	455	EHLKLSME	85	2	o20-42,i49-71o
GB_A12G2693	A12	98371725	98373558	-	CYP78A201_A	GbCYP78A201_A	530	FGSGRRSC	467	EVLRLHPP	386	1	i26-48o
GB_D12G2696	D12	57533090	57534924	-	CYP78A201_D	GbCYP78A201_D	530	FGSGRRSC	467	ETLRLYPS	372	1	i26-48o
GB_A13G0928	A13	30247253	30248894	-	CYP78A202_A	GbCYP78A202_A	518	FGSGRRVC	455	ETLRVHPP	379	2	o20-42,i49-71o
GB_D12G1857	D12	48120916	48121236	-	CYP78A428P_D	GbCYP78A428P_D	106	LESGRKVC	42	ETLRLHPP	367	0	o
GB_D05G2831	D05	27262484	27263901	-	CYP79A115_D	GbCYP79A115_D	436	FGNGRRRC	430	EFLKKHDA	117	1	i21-43o
GB_A05G2839	A05	31772872	31774366	-	CYP79A179_A	GbCYP79A179_A	461	FSTGRRGC	390	EAFRIHPI	311	0	o
GB_D07G2238	D07	50351800	50353643	+	CYP79D117_D	GbCYP79D117_D	542	TGTIRKVE	275	EAFRLHPI	391	1	i5-27o
GB_A07G2271	A07	87419676	87421481	+	CYP79D118_A	GbCYP79D118_A	529	FSRGRRGC	458	EAFRLHPI	378	0	o
GB_A07G2272	A07	87493092	87495653	+	CYP79D120_A	GbCYP79D120_A	373	FGRGRRGC	297	EAFRLHPI	217	0	o
GB_A07G2276	A07	88210552	88217054	+	CYP79D121_A	GbCYP79D121_A	463	FGRGRRGC	387	EAFRLHPV	307	0	o
GB_D07G2240	D07	50485313	50486486	+	CYP79D122P_D	GbCYP79D122P_D	140	FGRGRRGC	458	EAFRLHPI	42	0	o
GB_D07G2241	D07	50571680	50571985	+	CYP79D123P_D	GbCYP79D123P_D	101	FSRGRRGC	80	EAFRLLPV	60	0	o
GB_A05G1113	A05	10259172	10261418	+	CYP79D64_A	GbCYP79D64_A	550	FSTGMRGC	476	EAFRLHPI	398	1	i21-43o
GB_D05G1097	D05	9208737	9210986	+	CYP79D64_D	GbCYP79D64_D	550	FRLGARVC	453	EAFRLHPI	398	1	i21-43o
GB_D07G2239	D07	50381775	50383549	+	CYP79D65_D	GbCYP79D65_D	534	FSRGRRGC	471	EAFRLHPV	378	0	o
GB_A07G2275	A07	88092605	88094421	+	CYP79D66_A	GbCYP79D66_A	545	FGRGRRGC	465	EAFRLHPV	385	1	i2-24o
GB_D07G2242	D07	50595283	50597141	+	CYP79D66_D	GbCYP79D66_D	559	VGKHRLIQ	37	EAFRLHPV	403	1	i20-42o
GB_A12G0586	A12	12569847	12571429	-	CYP81AT1_A	GbCYP81AT1_A	500	FGLGRRAC	431	ETLRLYPA	357	1	i7-24o
GB_D12G0577	D12	9403126	9404705	-	CYP81AT1_D	GbCYP81AT1_D	500	FGLGRRSC	431	ESLRLYPP	386	1	i7-24o
GB_A11G2383	A11	60973107	60974163	+	CYP81AT2_A	GbCYP81AT2_A	324	FGMGRRAC	252	ETLRLYPA	180	0	o
GB_D11G2155	D11	25868002	25869585	-	CYP81AT2_D	GbCYP81AT2_D	500	FGMGRRAC	428	ETLRLYPP	378	1	i7-24o
GB_A07G0858	A07	11559044	11560957	+	CYP81AT5_A	GbCYP81AT5_A	501	FGLGRRAC	430	EAQRLYPA	359	1	i7-24o
GB_D07G0865	D07	9820365	9822268	+	CYP81AT5_D	GbCYP81AT5_D	448	FGCGRRDC	457	EAQRLYPA	359	1	i7-24o
GB_D07G0867	D07	9850283	9851200	+	CYP81AT6_D-C-term	GbCYP81AT6_D-C-term	240	MVAGKRYY	188	EAQRLHPA	98	0	o
GB_D07G0866	D07	9849500	9850141	+	CYP81AT6_D-N-term	GbCYP81AT6_D-N-term	213	FGLGMRAC	430	EVRRLLVR	152	1	o4-23i
GB_A07G0861	A07	11666990	11668131	+	CYP81AT6P_A	GbCYP81AT6P_A	294	FGLGRRAC	223	EAQRLHPA	152	0	o
GB_A11G2381	A11	60919776	60921312	+	CYP81AT7P_A	GbCYP81AT7P_A	406	WRNLRRIC	111	EMRRLLLK	138	2	i13-35,o50-72i
GB_D10G2626	D10	63787525	63789791	+	CYP81AZ1_D	GbCYP81AZ1_D	412	WRNLRRIC	127	ETLRLNLA	357	1	i7-25o
GB_D10G2628	D10	63815197	63817704	+	CYP81AZ2_D	GbCYP81AZ2_D	494	FGLGRRAC	425	ETLRLNPA	354	1	i3-22o
GB_A10G2666	A10	109070375	109073182	+	CYP81AZ3_A	GbCYP81AZ3_A	465	FGLGRRGC	396	ETLRLTPA	325	1	o4-23i
GB_D10G2627	D10	63806117	63808863	+	CYP81AZ3_D	GbCYP81AZ3_D	494	FGLGRRGC	425	ETLRLNPA	354	0	o
GB_A10G2667	A10	109080182	109095451	+	CYP81AZ4P_A	GbCYP81AZ4P_A	363	WRNLRRIC	70	QTFRLNPA	296	0	o
GB_A06G0233	A06	2371170	2372752	-	CYP81B177_A	GbCYP81B177_A	500	FGAGRRGC	429	ETLRMYPP	356	0	o
GB_D06G0226	D06	2155381	2156963	-	CYP81B177_D	GbCYP81B177_D	500	FGAGKRAC	443	ETLRMYPP	356	0	o
GB_A02G0892	A02	20450007	20451623	-	CYP81B88_A	GbCYP81B88_A	476	FGTGRRGC	405	ETFRMCPP	332	1	i5-24o
GB_D02G0959	D02	16254893	16256510	-	CYP81B88_D	GbCYP81B88_D	508	FGTGRRGC	437	ETFRMCPP	364	1	i3-20o
GB_A05G2679	A05	28584976	28602045	-	CYP81B89_A	GbCYP81B89_A	444	FGNGRQRC	373	ETFRIKPT	300	0	o
GB_D05G2678	D05	24905525	24907118	-	CYP81B89_D	GbCYP81B89_D	501	FASRPRTL	107	ETFRMKPT	357	0	o
GB_A05G2113	A05	20468220	20469815	+	CYP81B90_A	GbCYP81B90_A	506	FGTGRRRC	435	ETFRMCPV	362	1	i5-24o
GB_D05G2136	D05	18410045	18411388	+	CYP81B90_D	GbCYP81B90_D	422	FGVGRRAC	447	ETFRMCPV	278	0	o
GB_A02G1830	A02	99439317	99442735	+	CYP81BA1_A	GbCYP81BA1_A	507	FGMGRRAY	439	ETLRLYPA	365	0	o
GB_D03G0256	D03	2500379	2503864	-	CYP81BA1_D	GbCYP81BA1_D	507	FGMGRRAC	439	ETLRLYPA	365	0	o
GB_A12G0830	A12	28488480	28490054	+	CYP81BA2_A	GbCYP81BA2_A	252	FGLGRRAC	182	ETLRLYPA	108	0	o
GB_D12G0777	D12	28409381	28411746	+	CYP81BA2_D	GbCYP81BA2_D	504	FGLGRRAC	434	ETLRMANV	359	0	o
GB_A12G0829	A12	28345741	28346187	+	CYP81BA3P_A	GbCYP81BA3P_A	148	FGLGKRAC	119	ETLRLYPA	45	0	o
GB_A05G2108	A05	20429374	20429709	-	CYP81BQ15P_A	GbCYP81BQ15P_A	111	FGLGRRAC	40	EALCSPRP	95	1	i46-68o
GB_A02G0895	A02	20555676	20557829	+	CYP81BQ6_A	GbCYP81BQ6_A	507	FGLGRRAC	435	ETLRLYPA	361	1	i2-24o
GB_D02G0962	D02	16292181	16294353	+	CYP81BQ6_D	GbCYP81BQ6_D	511	FGLGRRAC	439	ETLRLYPA	361	1	i12-29o
GB_A05G2107	A05	20426709	20429169	-	CYP81T4_A	GbCYP81T4_A	518	FGVGRRAC	447	ETMRLFPP	375	1	i7-26o
GB_D05G2132	D05	18372814	18375296	-	CYP81T4_D	GbCYP81T4_D	518	FGSGVHAC	410	ETMRLFPP	375	1	i7-26o
GB_A11G1989	A11	27819284	27822432	-	CYP82C136_A	GbCYP82C136_A	523	FGLGRRSC	453	ETLRLYPS	375	2	o4-26,i227-246o
GB_A04G1617	A04	79968489	79975881	-	CYP82C137_A	GbCYP82C137_A	518	FGAGRRIC	451	ETMRLYPA	374	1	i7-26o
GB_D04G2011	D04	55325490	55326902	+	CYP82C138P_D	GbCYP82C138P_D	286	LGVRRALV	77	ETMRLYPA	171	0	o
GB_A11G1986	A11	27723126	27723680	-	CYP82C141_A	GbCYP82C141_A	184	FGSGRRSC	104	ETLRLYPP	26	0	o
GB_A11G1987	A11	27723718	27724880	-	CYP82C142P_A	GbCYP82C142P_A	338	MVGGKRYF	199	ECFTVHDK	94	2	o4-26,i227-246o
GB_A04G1616	A04	79965083	79966805	-	CYP82C51_A	GbCYP82C51_A	549	FGSGRRIC	481	ETLRLYPA	404	2	o38-57,i254-276o
GB_D04G2002	D04	55281836	55283477	-	CYP82C51_D	GbCYP82C51_D	522	FNGGPRLC	475	ETLRLYPA	377	2	o10-32,i227-249o
GB_D04G2003	D04	55284479	55285517	-	CYP82C52_D-C-term	GbCYP82C52_D-C-term	319	FGAGRRIC	454	ETLRLYPA	175	1	i24-46o
GB_D04G2004	D04	55285518	55286099	-	CYP82C52_D-N-term	GbCYP82C52_D-N-term	193	FGAGRRIC	252	EQLHFALA	5	1	i7-26o
GB_A05G2014	A05	19392922	19394749	-	CYP82C54_A	GbCYP82C54_A	526	FGSGRRSC	457	ETLRLYPA	380	2	o4-23,i226-245o
GB_D05G2038	D05	17495097	17496921	-	CYP82C54_D	GbCYP82C54_D	525	FGAGRRLC	459	ETLRLYPA	379	2	o4-23,i225-244o
GB_A12G0278	A12	4218062	4219119	+	CYP82C59_A	GbCYP82C59_A	326	IAGKRYSC	199	ESKRCQNA	212	2	o10-29,i223-245o
GB_D12G0434	D12	6004712	6006310	-	CYP82C59_D	GbCYP82C59_D	460	FGSGRRIC	392	ETLRLHPP	373	2	o10-27,i163-185o
GB_A11G1988	A11	27763597	27764823	-	CYP82C96_A	GbCYP82C96_A	358	EEAEARRC	213	ECFTVHDK	94	2	o4-26,i227-246o
GB_D11G2037	D11	22627466	22629193	-	CYP82C96_D	GbCYP82C96_D	525	FGSGRRSC	456	ETLRLGNV	377	2	o4-26,i227-246o
GB_D05G3223	D05	36800786	36802448	-	CYP82D109_D	GbCYP82D109_D	522	FGAGHRLC	381	ETLRMYPP	377	1	i7-24o
GB_A06G0145	A06	1371062	1372717	-	CYP82D110_A	GbCYP82D110_A	520	FGSGRRSC	452	ETLRMYPP	375	1	i7-24o
GB_D06G0145	D06	1360380	1362038	-	CYP82D110_D	GbCYP82D110_D	521	LGNNRAML	118	ETLRMYPP	375	1	i7-24o
GB_A05G2012	A05	19325402	19327078	+	CYP82D111_A	GbCYP82D111_A	523	FGSGRRNC	455	ETFRMYPP	378	1	i7-24o
GB_D05G2034	D05	17434600	17436257	-	CYP82D112_D	GbCYP82D112_D	522	FGSGRRSC	454	ETLRLYPP	377	2	o4-23,i227-246o
GB_A05G2009	A05	19262481	19263902	-	CYP82D112a_A	GbCYP82D112a_A	443	FGSGRRSC	379	ETLRLYPP	302	0	o
GB_A05G2010	A05	19267658	19274538	-	CYP82D112b_A	GbCYP82D112b_A	523	FGSGRRSC	455	EVLRYRKA	216	1	i7-24o
GB_A05G2007	A05	19251554	19253211	-	CYP82D113_A	GbCYP82D113_A	522	FGSGRRSC	454	ETLRMYPP	377	1	i7-24o
GB_D05G2033	D05	17427940	17429597	-	CYP82D113_D	GbCYP82D113_D	522	FSSGRRMC	371	ETLRMYPP	377	1	i7-24o
GB_A01G1172	A01	24960073	24961717	+	CYP82D144_A	GbCYP82D144_A	520	FGSGRRMC	453	ETLRLYPA	376	1	i7-26o
GB_D01G1266	D01	19554261	19555914	+	CYP82D144_D	GbCYP82D144_D	520	FGSGRRMC	453	ETLRLYPA	376	2	o10-27,i314-336o
GB_D05G2036	D05	17476283	17477236	+	CYP82D145_D	GbCYP82D145_D	288	FGSGRRSC	454	ETFRMYPP	143	0	o
GB_A05G2013	A05	19390504	19392215	-	CYP82D146_A	GbCYP82D146_A	518	FGAGRRLC	459	ESLRLYPA	382	1	i7-29o
GB_D05G2037	D05	17492751	17494486	-	CYP82D146_D	GbCYP82D146_D	526	FGSGRRSC	220	ESLRLYPA	382	1	i7-29o
GB_A05G2655	A05	28118072	28125373	-	CYP82D147_A	GbCYP82D147_A	540	FGSGRRVC	472	ETTRLYPA	395	1	i9-31o
GB_D05G2655	D05	24716495	24717376	-	CYP82D147_D	GbCYP82D147_D	293	LTGGYRIL	152	ECLEEHKR	270	1	o10-30i
GB_A06G0135	A06	1239486	1241485	-	CYP82D148_A	GbCYP82D148_A	530	FGSGRRMC	459	ETLRLYPA	382	2	o10-32,i117-139o
GB_D06G0138	D06	1238628	1240628	-	CYP82D148_D	GbCYP82D148_D	530	LTGGYRIL	124	ETLRLYPA	382	2	o10-32,i122-139o
GB_A06G0136	A06	1253981	1255096	-	CYP82D149_A	GbCYP82D149_A	322	MVVGKRIP	203	ECLTIHDK	97	1	i7-29o
GB_A06G0137	A06	1263937	1266308	-	CYP82D150_A	GbCYP82D150_A	526	FGSGRRMC	455	ETLRLYPP	378	1	i7-29o
GB_D06G0140	D06	1250743	1252878	-	CYP82D150_D	GbCYP82D150_D	472	FNLTRFIV	135	ETLRLYPP	378	1	i7-29o
GB_D06G0142	D06	1270906	1288021	-	CYP82D151_D	GbCYP82D151_D	531	FGSGRRMC	331	ETLRLYLA	377	1	i7-29o
GB_D05G2032	D05	17417183	17418646	-	CYP82D218_D	GbCYP82D218_D	442	FGLGPRIC	444	ETMRLYPA	294	0	o
GB_D06G0141	D06	1259586	1260921	-	CYP82D219_D	GbCYP82D219_D	399	FGSGRRMC	455	ETLRLYPP	254	0	o
GB_A06G0141	A06	1331260	1344634	-	CYP82D220_A	GbCYP82D220_A	534	FGSGRRMC	463	ETLRLYPP	386	2	o10-30,i43-65o
GB_D06G0143	D06	1293124	1294233	-	CYP82D222P_D	GbCYP82D222P_D	301	FSSGRRMC	454	ETLRLYPV	153	0	o
GB_D06G0144	D06	1312173	1344010	-	CYP82D322_D	GbCYP82D322_D	341	FGSGRRMC	230	ENLKWRKS	217	1	i7-29o
GB_A05G2006	A05	19219508	19221175	-	CYP82D326P_A	GbCYP82D326P_A	447	FSSGRRMC	376	ETMRLYPA	299	1	i7-29o
GB_A06G0140	A06	1306697	1308631	-	CYP82D327a_A	GbCYP82D327a_A	501	FSSGRRMC	430	ETLRLYPA	353	1	i7-29o
GB_A06G0138	A06	1279018	1280876	-	CYP82D327bP_A	GbCYP82D327bP_A	432	FSSGRRMC	361	ETLRLYPA	302	1	i7-29o
GB_D06G0139	D06	1246799	1247793	-	CYP82D328P_D	GbCYP82D328P_D	158	FGSGRRMC	459	EMLRLYSP	100	0	o
GB_A06G0142	A06	1347578	1350127	-	CYP82D330_A	GbCYP82D330_A	527	FGSGRRMC	456	ETLRLYPP	379	1	i7-29o
GB_A06G0144	A06	1367409	1368529	-	CYP82D332P_A	GbCYP82D332P_A	338	FGSGRRMC	267	ETLRLYPT	190	0	o
GB_A06G0134	A06	1208848	1216664	-	CYP82D337_A	GbCYP82D337_A	500	FGSGRRMC	454	ETLRLYPA	377	1	i7-29o
GB_A07G1759	A07	44291892	44293801	-	CYP82J10_A	GbCYP82J10_A	530	FGSGRRSC	459	ETLRLYPP	382	0	o
GB_D07G1770	D07	31074816	31076732	-	CYP82J10_D	GbCYP82J10_D	530	FEPERLAC	100	ETLRLYPP	382	0	o
GB_D11G1507	D11	14081079	14086548	-	CYP82J11_D	GbCYP82J11_D	373	MIAGKRYF	199	ETMRLHPV	364	2	i5-27,o314-336i
GB_A11G1472	A11	16186521	16186919	-	CYP82J26P_A	GbCYP82J26P_A	132	FGSGRRSC	61	LTPRLPPH	121	0	o
GB_A07G1388	A07	26290980	26291996	+	CYP82J27P_A	GbCYP82J27P_A	293	FESERRAC	222	ELLLVHRV	42	0	o
GB_D07G1390	D07	19977497	19978109	+	CYP82J27P_D	GbCYP82J27P_D	180	FGAGRRIC	440	NAWKLHRD	83	0	o
GB_A07G1012	A07	15148832	15152185	+	CYP82L15_A	GbCYP82L15_A	515	FSSGRRSC	445	ESLRLYPP	368	2	o4-21,i217-234o
GB_D07G1006	D07	11891792	11895138	+	CYP82L15_D	GbCYP82L15_D	515	FGGGTRQC	409	ETLRLYPP	368	2	o4-21,i217-236o
GB_D07G1009	D07	11956153	11957840	+	CYP82L16_D	GbCYP82L16_D	382	FSSGRRSC	445	ETLRLYPP	368	0	o
GB_D07G1010	D07	12003731	12006671	+	CYP82L17_D	GbCYP82L17_D	494	IAAGRHMG	105	ETLRLYPP	368	2	o4-21,i216-233o
GB_A07G1013	A07	15229747	15231826	+	CYP82L32_A	GbCYP82L32_A	521	FSSGRRSC	445	ETLRLYPP	368	0	o
GB_A10G2257	A10	101293563	101295163	-	CYP83F44_A	GbCYP83F44_A	503	FGAGRRVC	438	ETFRLQTT	363	1	i2-21o
GB_D10G2239	D10	56619065	56620676	-	CYP83F44_D	GbCYP83F44_D	505	FGAGRRVC	439	ETFRLQTT	364	1	i2-21o
GB_A10G2258	A10	101343435	101344764	-	CYP83F45_A	GbCYP83F45_A	379	FGAGRRVC	313	ETFRLQAI	238	0	o
GB_A10G2259	A10	101346763	101348363	-	CYP83F46_A	GbCYP83F46_A	503	FGAGRRVC	437	ETFRLQAT	362	1	i5-22o
GB_D10G2240	D10	56637989	56639589	-	CYP83F46_D	GbCYP83F46_D	503	FGAGRRVC	437	ETFRLQAT	362	1	i5-22o
GB_A10G2261	A10	101388375	101389994	-	CYP83F47_A	GbCYP83F47_A	503	FGAGRRVC	437	ETFRLHPT	362	2	o5-22,i298-320o
GB_D10G2243	D10	56669683	56671300	-	CYP83F47_D	GbCYP83F47_D	503	FGAGRRVC	437	ETFRLHPT	362	2	o5-22,i298-320o
GB_A10G2263	A10	101439394	101441017	+	CYP83F48_A	GbCYP83F48_A	510	FGAGRRVC	444	ETFRLQPV	369	1	i7-29o
GB_D10G2246	D10	56717714	56719310	+	CYP83F48_D	GbCYP83F48_D	501	FGAGRRVC	435	ETFRLQPV	362	1	i5-22o
GB_D10G2551	D10	62563126	62564710	+	CYP83F50a_D	GbCYP83F50a_D	497	FGAGRRVC	431	ETFRLQPI	356	1	i2-21o
GB_D03G0228	D03	2145951	2147533	-	CYP83F50b_D	GbCYP83F50b_D	457	FGAGRRVC	391	EVMKTHDL	87	1	i2-21o
GB_A02G1860	A02	99787718	99824794	+	CYP83F51_A	GbCYP83F51_A	905	FGAGRRAC	839	ETFRLQPI	764	4	o4-21,i292-314,o410-429,i700-722o
GB_D10G2245	D10	56702621	56704218	+	CYP83F63_D	GbCYP83F63_D	505	FGAGRRVC	439	ETFRLQPA	364	1	i2-21o
GB_A10G2262	A10	101409293	101419498	+	CYP83F64_A	GbCYP83F64_A	499	FGAGRRVC	433	ETFRLQPA	358	1	i2-19o
GB_D10G2244	D10	56695341	56696556	+	CYP83F64_D	GbCYP83F64_D	334	FGAGRRVC	305	ETFRLQPT	230	0	o
GB_A02G1862	A02	99858482	99859803	+	CYP83F66_A	GbCYP83F66_A	400	FGAGRRVC	339	ETFRLQPV	264	0	o
GB_D05G1931	D05	16557315	16557779	+	CYP83F68P_D	GbCYP83F68P_D	154	FGGGQRLC	425	ETFRLQPT	45	0	o
GB_A05G1905	A05	18217367	18217918	+	CYP83F69P_A	GbCYP83F69P_A	183	FSAGRRIC	116	ETFRLQPT	41	0	o
GB_D03G0224	D03	2095996	2097332	-	CYP83F71_D	GbCYP83F71_D	414	FGAGRRVC	348	ETFRLQPI	273	0	o
GB_A10G2260	A10	101361530	101361951	-	CYP83F74P_A	GbCYP83F74P_A	103	FIAGTDTA	23	ETFRLHPT	82	1	o20-42i
GB_D10G2242	D10	56659921	56661065	-	CYP83F-fragment2_D	GbCYP83F-fragment2_D	184	LKEMRKLC	125	DAMRLSYN	105	0	o
GB_A10G1012	A10	19315949	19317286	+	CYP84A77_A	GbCYP84A77_A	445	FGSGRRSC	375	ETLRLHPP	300	0	o
GB_D10G0971	D10	11652074	11653621	-	CYP84A77_D	GbCYP84A77_D	515	FGSGRRSC	445	ETLRLHPP	370	1	i7-29o
GB_A11G1879	A11	24246893	24248689	-	CYP84A78_A	GbCYP84A78_A	521	FGSGRRSC	451	ETLRLHPP	376	1	i21-38o
GB_D11G1925	D11	20538282	20540077	-	CYP84A78_D	GbCYP84A78_D	521	FGSGRRSC	451	ESLRLYPP	386	1	i9-31o
GB_A11G0464	A11	4080192	4082237	-	CYP84A79_A	GbCYP84A79_A	517	FGSGRRSC	447	ETLRLHPP	372	1	i13-30o
GB_D11G0475	D11	3716342	3718385	-	CYP84A79_D	GbCYP84A79_D	517	FGSGRRSC	447	ESMRLYPP	349	1	i13-30o
GB_A13G0303	A13	3267791	3270261	-	CYP84A80_A	GbCYP84A80_A	540	FGSGRRSC	452	ETLRLHPP	377	1	i13-32o
GB_D13G0298	D13	2646155	2648111	-	CYP84A80_D	GbCYP84A80_D	540	FGSGRRSC	452	ESLRLHPV	315	1	i13-32o
GB_A07G0874	A07	11963452	11966402	-	CYP85A1_A	GbCYP85A1_A	466	FGGGTRQC	409	ETSRLATI	338	1	i3-25o
GB_D07G0881	D07	10096424	10099589	-	CYP85A1_D	GbCYP85A1_D	466	FGLGRRAC	169	ETSRLATI	338	1	i3-25o
GB_A07G2068	A07	78960053	78962742	-	CYP85A41_A	GbCYP85A41_A	466	FGGGTRQC	409	ETSRLATI	338	1	i2-24o
GB_D07G2085	D07	46366568	46369270	-	CYP85A41_D	GbCYP85A41_D	465	FGVGPRVC	457	ETSRLATI	337	1	i2-24o
GB_A13G0923	A13	29903900	29905186	-	CYP85A42_A	GbCYP85A42_A	256	FGGGSRLC	197	ETSRLATV	126	0	o
GB_D13G0905	D13	15570110	15572406	+	CYP85A42_D	GbCYP85A42_D	469	FGLGPRSC	456	ETSRLATV	339	1	i2-24o
GB_A03G0611	A03	9814579	9816114	+	CYP86A128_A	GbCYP86A128_A	511	FNAGPRTC	449	ETLRLYPS	370	1	i7-24o
GB_D03G1358	D03	44520576	44522111	-	CYP86A128_D	GbCYP86A128_D	511	LGARRAVV	83	ETLRLYPS	370	1	i7-24o
GB_A05G0908	A05	8482042	8483577	-	CYP86A129_A	GbCYP86A129_A	511	FNAGPRTC	449	ETLRLYPS	370	1	i7-24o
GB_D05G0888	D05	7510031	7511566	-	CYP86A129_D	GbCYP86A129_D	511	FQAGQRVC	440	ETLRLYPS	370	1	i7-24o
GB_A07G1113	A07	17746516	17748060	+	CYP86A130_A	GbCYP86A130_A	514	FNAGPRTC	452	ETLRLYPS	373	1	i5-27o
GB_D07G1113	D07	13918575	13920119	+	CYP86A130_D	GbCYP86A130_D	514	FGNGVHSC	431	ETLRLYPS	373	1	i7-26o
GB_A08G2202	A08	112337123	112338727	-	CYP86A131_A	GbCYP86A131_A	534	FNAGPRIC	450	ETLRLYPS	372	0	o
GB_D08G2191	D08	59774446	59776050	-	CYP86A131_D	GbCYP86A131_D	534	QGNRRRMT	231	ETLRLYPS	372	0	o
GB_A08G1667	A08	98142730	98144313	-	CYP86A132_A	GbCYP86A132_A	527	FNAGPRIC	450	ETLRLYPS	372	1	i7-24o
GB_D08G1662	D08	50042534	50044117	-	CYP86A132_D	GbCYP86A132_D	527	FHAGPRIC	449	ETLRLYPS	372	1	i7-24o
GB_A11G0941	A11	8392862	8394448	-	CYP86A133_A	GbCYP86A133_A	528	FNAGPRIC	450	ETLRLFPS	372	1	i7-24o
GB_D11G0973	D11	7888805	7890391	-	CYP86A133_D	GbCYP86A133_D	528	FNAGPRIC	450	ETLRLYPA	366	1	i7-24o
GB_A12G2587	A12	97422008	97423591	-	CYP86A134_A	GbCYP86A134_A	527	FNAGPRIC	450	ETLRLYPS	372	1	i5-27o
GB_D12G2590	D12	56643889	56646216	-	CYP86A134_D	GbCYP86A134_D	562	FNAGPRIC	450	ETVRLANI	341	1	i5-27o
GB_A04G1334	A04	76580083	76582030	-	CYP86B32_A	GbCYP86B32_A	547	FNGGPRLC	475	EALRLYPS	399	1	i23-45o
GB_D04G1722	D04	52252833	52254784	-	CYP86B32_D	GbCYP86B32_D	547	FGAGRRMC	443	EALRLYPS	399	1	i23-45o
GB_A13G0647	A13	12570078	12572877	-	CYP86B33_A	GbCYP86B33_A	539	FNGGPRLC	470	EALRLYPS	394	2	o28-50,i57-74o
GB_D13G0642b	D13	8059670	8066733	+	CYP86B33P_D	GbCYP86B33P_D	269	FGLGPRTC	453	EALRLCPS	320	0	o
GB_D13G0642a	D13	8059670	8066733	+	CYP86B95P_D	GbCYP86B95P_D	136	FNGGPRLC	83	ETLQLYSQ	50	0	o
GB_A03G1611	A03	90357926	90364465	+	CYP86C17_A	GbCYP86C17_A	522	FNAGPRLC	458	ESLRLYPS	382	1	i20-39o
GB_D02G1770	D02	56275564	56277132	+	CYP86C17_D	GbCYP86C17_D	522	FNAGPRLC	458	ESLRLYPS	382	1	i13-35o
GB_D02G1769	D02	56198469	56198921	+	CYP86C27P_D	GbCYP86C27P_D	150	FNAGPRRC	86	ESLRLYPS	10	0	o
GB_A03G0226	A03	2739861	2742058	+	CYP87A54_A	GbCYP87A54_A	474	FGGGLRFC	413	ETVRLANI	341	1	i2-21o
GB_D03G1771	D03	50879056	50881249	-	CYP87A54_D	GbCYP87A54_D	474	FGGGMRFC	413	ETVRLANI	341	1	i2-21o
GB_A12G2552	A12	97047247	97049562	+	CYP87A55_A	GbCYP87A55_A	474	FGGGMRFC	413	ETVRLANI	341	0	o
GB_D12G2554	D12	56330106	56332421	+	CYP87A55_D	GbCYP87A55_D	474	FGGGMRFC	413	ESLRLHPV	357	0	o
GB_A03G0228	A03	2791931	2795552	+	CYP87A56_A	GbCYP87A56_A	469	FGGGMRFC	408	ETVRLANI	336	1	i2-21o
GB_D03G1770	D03	50869446	50871626	-	CYP87A56_D	GbCYP87A56_D	474	FGNGVHSC	440	ETVRLANI	341	1	i2-21o
GB_A03G0227	A03	2782616	2784795	+	CYP87A94_A	GbCYP87A94_A	446	FGGGMRFC	388	ETVRLANI	341	1	i2-19o
GB_D12G2907	D12	59346821	59348332	+	CYP87A96P_D	GbCYP87A96P_D	310	FGSVVRLC	278	EVLRLYSP	384	0	o
GB_A07G0565	A07	6413444	6415872	+	CYP87B28_A	GbCYP87B28_A	483	FGGGNRTC	424	ESLRLANV	352	1	i7-24o
GB_D07G0574	D07	6055157	6067729	+	CYP87B28_D	GbCYP87B28_D	483	FQAGPRIC	498	ESLRLANV	352	1	i7-24o
GB_A01G0518	A01	6411498	6420334	-	CYP87B29_A	GbCYP87B29_A	483	FGGGNRPC	424	ETLRLENL	349	2	o4-23,i277-299o
GB_A01G0516	A01	6394075	6396465	-	CYP87B30_A	GbCYP87B30_A	405	YGGGDRPC	368	DTLTFNPS	344	0	o
GB_D01G0537	D01	6027551	6030606	-	CYP87B30_D	GbCYP87B30_D	435	FGGGNRPC	376	ETLRLENV	304	1	i5-27o
GB_A03G0592	A03	9173723	9195257	-	CYP87B31_A	GbCYP87B31_A	457	FGGGNRAC	400	ETLRLGNF	328	2	o5-24,i256-278o
GB_D03G1382	D03	44966901	44971811	+	CYP87B31_D	GbCYP87B31_D	472	FNAGPRTC	449	ETLRLGNF	343	1	i5-27o
GB_D08G1939	D08	55364536	55366704	-	CYP88A138_D	GbCYP88A138_D	402	FGNGTHSC	407	ESLRRNYF	350	1	i5-24o
GB_A06G1863	A06	109681364	109684890	-	CYP88A77_A	GbCYP88A77_A	494	FGAGSRLC	431	ETLRLITF	361	1	i7-26o
GB_D06G1926	D06	55249810	55253271	-	CYP88A77_D	GbCYP88A77_D	499	FGAGRRIC	444	ETLRLITF	366	1	i5-27o
GB_A08G1946	A08	105869832	105874135	-	CYP88A78_A	GbCYP88A78_A	490	FGSGSKTC	431	ESLRRNYF	360	1	i5-27o
GB_A13G0124	A13	1282752	1286194	-	CYP88A80_A	GbCYP88A80_A	495	FGAGSRLC	429	ETLRLVTF	359	0	o
GB_D13G0120	D13	979625	983319	-	CYP88A80_D	GbCYP88A80_D	440	FGAGSRLC	374	EALRLHPP	357	0	o
GB_A08G1947	A08	105900654	105978632	-	CYP88A81_A	GbCYP88A81_A	945	FGAGSRIC	428	ETLRRASV	358	2	o4-26,i461-483o
GB_D08G1940	D08	55393994	55437723	-	CYP88A81_D	GbCYP88A81_D	945	FSTIRHIE	162	ETLRRASV	358	2	o4-26,i461-483o
GB_D09G2107	D09	49467298	49471227	+	CYP88P1a_D	GbCYP88P1a_D	464	FSTGSSTC	405	ATIHLHNH	304	1	i5-22o
GB_D09G2105	D09	49440997	49445127	+	CYP88P1b_D	GbCYP88P1b_D	481	FSTGSSTC	422	ETLRIRTN	352	1	i5-22o
GB_A09G2262	A09	74369558	74421106	+	CYP88P2_A	GbCYP88P2_A	480	FSTGSSTC	421	ETLRIRTN	351	1	i5-22o
GB_A02G1386	A02	77007757	77009295	+	CYP89A152_A	GbCYP89A152_A	512	FGVGRRIC	446	EGLRRHPP	368	1	i5-27o
GB_D03G0585	D03	10170014	10171552	+	CYP89A152_D	GbCYP89A152_D	512	FGVGRRIC	446	EGLRRHPP	368	1	i5-27o
GB_A08G2623	A08	117520199	117521743	+	CYP89A153_A	GbCYP89A153_A	514	FGVGRRIC	450	EGLRRHPP	368	0	o
GB_D08G2614	D08	64528608	64530152	+	CYP89A153_D	GbCYP89A153_D	514	FQAGPRIC	441	EGLRRHPP	368	0	o
GB_A11G3526	A11	112712995	112714521	+	CYP89A154_A	GbCYP89A154_A	508	FGVGRRIC	445	EGLRRHPP	368	0	o
GB_D11G3500	D11	68361555	68363096	+	CYP89A154_D	GbCYP89A154_D	513	FGVGRRIC	450	ETLRLHTP	76	0	o
GB_A11G3527	A11	112727278	112728807	+	CYP89A155_A	GbCYP89A155_A	509	FGVGRRIC	446	EGLRRHPP	369	1	i5-27o
GB_D11G3501	D11	68367808	68374720	+	CYP89A155_D	GbCYP89A155_D	513	FGVGRRIC	450	EGLRRHPP	369	1	i5-27o
GB_A11G3528	A11	112736646	112738184	+	CYP89A156_A	GbCYP89A156_A	512	FGVGRRIC	449	EGLRRHPP	368	1	i5-24o
GB_A13G1237	A13	63601614	63603167	-	CYP89A157_A	GbCYP89A157_A	517	FGVGRRIC	454	EGLRRHPP	372	1	i5-27o
GB_D13G0992	D13	20008278	20009831	+	CYP89A157_D	GbCYP89A157_D	517	YGPTWRVL	111	EGLRRHPP	372	1	i5-27o
GB_D03G0520	D03	7842512	7843949	-	CYP89A283_D	GbCYP89A283_D	421	FRVGKRMC	381	ESLRRHPP	304	1	i2-24o
GB_A02G1676	A02	96134831	96136204	-	CYP89A294P_A	GbCYP89A294P_A	457	FGVGKRMC	393	ESLRRHPP	316	0	o
GB_D13G0994	D13	20063415	20064152	+	CYP89A295_D	GbCYP89A295_D	245	FGARRRIC	223	EGLRRHPP	142	0	o
GB_A06G1930	A06	111516566	111520884	-	CYP90A46_A	GbCYP90A46_A	472	FGGGPRLC	414	ETLQLISA	43	1	i2-24o
GB_D06G1998	D06	56548677	56552990	-	CYP90A46_D	GbCYP90A46_D	472	FGAGSRLC	436	ESLRKHYV	192	1	i2-24o
GB_A10G2768	A10	110722995	110727608	+	CYP90A47_A	GbCYP90A47_A	470	FGGGPRLC	411	ETLRVANI	338	1	i2-21o
GB_D10G2729	D10	65945377	65949906	+	CYP90A47_D	GbCYP90A47_D	473	FGGGPRLC	411	ETLQLIAA	44	1	i2-21o
GB_A11G1939	A11	25770129	25773474	-	CYP90B35_A	GbCYP90B35_A	485	FGGGPRLC	428	ETLRLGNV	346	1	i7-24o
GB_D11G1986	D11	21566853	21570041	-	CYP90B35_D	GbCYP90B35_D	516	FGGGPRLC	459	ETLRLANI	362	1	i7-24o
GB_A02G1972	A02	101310561	101314246	+	CYP90C25_A	GbCYP90C25_A	324	FGGGQRLC	264	ETLRMANI	192	0	o
GB_D03G0113	D03	808407	815125	-	CYP90C25_D	GbCYP90C25_D	516	FGGGQRLC	456	ETLRMANI	384	1	i17-34o
GB_A11G1893	A11	24788507	24792318	-	CYP90C26_A	GbCYP90C26_A	510	FGGGQRLC	454	ETLRLANI	381	1	i20-42o
GB_D11G1940	D11	20875167	20878864	-	CYP90C26_D	GbCYP90C26_D	491	FGGGQRLC	435	ETLRLHPP	376	1	i2-23o
GB_A05G1372	A05	12814392	12818069	-	CYP90D39_A	GbCYP90D39_A	483	FGGGQRLC	425	ETLRMGNI	354	1	i5-27o
GB_D05G1376	D05	11606208	11609645	-	CYP90D39_D	GbCYP90D39_D	483	FGGGPRMC	418	EALRMGNI	354	1	i7-26o
GB_A10G0550	A10	5543791	5545909	-	CYP92A131_A	GbCYP92A131_A	510	FGAGRRMC	439	EAMRLHPV	364	1	i5-24o
GB_D10G0571	D10	5164517	5166619	-	CYP92A131_D	GbCYP92A131_D	510	FGAGRRMC	439	ETMRLHPV	364	1	i5-24o
GB_A10G0551	A10	5565583	5568230	-	CYP92A132_A	GbCYP92A132_A	510	FGSGRRKC	439	EAMRLHPV	364	1	i7-26o
GB_D10G0572	D10	5170110	5172475	-	CYP92A132_D	GbCYP92A132_D	510	FGSGRRKC	439	EAMRLHPV	364	1	i7-26o
GB_A06G0871	A06	19318722	19320942	-	CYP92A133_A	GbCYP92A133_A	517	FGSGRRMC	445	ETMRKHPV	370	0	o
GB_D06G0866	D06	13701333	13702064	-	CYP92A133_D	GbCYP92A133_D	243	FGLGVRTC	453	EFLKKHDH	89	1	i7-29o
GB_A11G1408	A11	15390441	15392924	+	CYP92A28_A	GbCYP92A28_A	511	FGAGRRMC	439	ETMRLHPV	364	1	i5-24o
GB_D11G1453	D11	13518928	13521405	+	CYP92A28_D	GbCYP92A28_D	511	FGAGRRMC	439	EVLRLHPP	391	1	i5-24o
GB_A09G1543	A09	65774096	65774509	+	CYP93A190P_A	GbCYP93A190P_A	97	KKTGRRKE	2	ENPLEFRP	56	0	i
GB_A01G2223	A01	110557221	110559383	-	CYP93A87_A	GbCYP93A87_A	505	FGSGRRSC	439	ETLRLHPA	362	1	i7-26o
GB_D01G2307	D01	59565818	59567972	-	CYP93A87_D	GbCYP93A87_D	505	FGSGRRSC	439	ETLRLHPA	362	1	i7-26o
GB_A01G2225	A01	110601220	110602843	-	CYP93A88_A	GbCYP93A88_A	515	FGSGRRSC	446	ETLRLHPS	363	1	i7-26o
GB_D01G2308	D01	59572343	59573966	-	CYP93A88_D	GbCYP93A88_D	515	FGSGRRSC	446	ETLRLHPS	363	1	i7-26o
GB_A09G1542	A09	65769407	65771125	+	CYP93A89_A	GbCYP93A89_A	517	FGSGRRSC	447	ETLRLHPG	365	1	i7-26o
GB_D09G1376	D09	41675919	41677653	+	CYP93A89_D	GbCYP93A89_D	517	FGSGRRSC	447	ETLRLHPG	365	1	i7-26o
GB_A13G1532	A13	88025142	88027448	+	CYP93B35_A	GbCYP93B35_A	532	FGTGRRGC	449	ESFRLHPP	365	1	i7-29o
GB_D13G1476	D13	41330321	41331402	-	CYP93B35_D	GbCYP93B35_D	311	FSARKHTA	101	EELRENKK	260	1	i7-29o
GB_D09G2116	D09	49536185	49537734	-	CYP93B85P_D	GbCYP93B85P_D	316	FGTGRRGC	249	ETVNLTQE	115	0	o
GB_A13G1557	A13	90181849	90182971	-	CYP93B86P_A	GbCYP93B86P_A	326	FGCCNGII	316	ETVNLSKS	171	1	i7-29o
GB_A07G2405	A07	90599158	90600192	-	CYP94A131_A	GbCYP94A131_A	344	FQAGPRIC	277	ESMRLYPP	196	0	o
GB_A07G2466	A07	91604931	91606451	+	CYP94A72_A	GbCYP94A72_A	506	FQAGPRVC	441	ECMRLYPP	360	1	i5-22o
GB_D07G2444	D07	53657297	53658817	+	CYP94A72_D	GbCYP94A72_D	506	FGAGRRMC	439	ECMRLYPP	360	1	i5-22o
GB_A07G2467	A07	91649955	91651478	+	CYP94A73_A	GbCYP94A73_A	507	FQAGPRVC	442	ECMRLYPP	361	0	o
GB_D07G2741	scaffold591_obj_D07	5958	7478	+	CYP94A73_D	GbCYP94A73_D	506	FQAGPRLC	441	ECMRLYPP	360	1	i5-22o
GB_A08G2262	A08	113062187	113063707	+	CYP94A74_A	GbCYP94A74_A	506	FQAGPRIC	441	ESMRLYPP	360	1	i2-24o
GB_D08G2260	D08	60562617	60564137	+	CYP94A74_D	GbCYP94A74_D	506	FNAGPRIC	450	ESMRLYPP	360	1	i2-24o
GB_A03G0642	A03	11221596	11222831	+	CYP94B68_A	GbCYP94B68_A	411	FQAGPRVC	349	ESMRLYPP	268	0	o
GB_A05G3627	A05	80205614	80207128	+	CYP94B69_A	GbCYP94B69_A	504	FQAGPRIC	441	ESMSLYPP	360	0	o
GB_D04G0835	D04	15282537	15284063	+	CYP94B69_D	GbCYP94B69_D	508	FGGGPRLC	372	ESMRLYPP	364	1	i7-29o
GB_A11G0396	A11	3486684	3488231	-	CYP94B70_A	GbCYP94B70_A	515	FQAGPRVC	453	ESMRLYPP	372	1	i5-27o
GB_D11G0407	D11	3192408	3193886	-	CYP94B70_D	GbCYP94B70_D	492	FQAGPRVC	430	ETLRLHPV	231	0	o
GB_A09G0536	A09	15749648	15751099	-	CYP94B71_A	GbCYP94B71_A	483	FQAGPRVC	420	ESMRLYPP	338	0	o
GB_D09G0420	D09	13524843	13526375	-	CYP94B71_D	GbCYP94B71_D	510	FGSGPRKC	442	ESMRLYPP	365	1	i7-29o
GB_A04G0780	A04	45449558	45451060	-	CYP94C83_A	GbCYP94C83_A	500	FQGGFRVC	438	ESMRLYPP	361	1	i13-35o
GB_D04G1189	D04	36881773	36883275	+	CYP94C83_D	GbCYP94C83_D	500	FQAGPRIC	445	ESMRLYPP	361	1	i13-35o
GB_A05G0848	A05	7901114	7902628	-	CYP94C84_A	GbCYP94C84_A	504	FQAGQRVC	440	ESLRLFPP	364	1	i13-35o
GB_D05G0829	D05	6992056	6993570	-	CYP94C84_D	GbCYP94C84_D	504	FGTGRRSC	458	ESLRLFPP	364	1	i13-35o
GB_A08G0078	A08	551688	553235	+	CYP94C85_A	GbCYP94C85_A	515	FQAGLRVC	453	ESLRLFPP	377	1	i25-47o
GB_D08G0078	D08	571006	572112	+	CYP94C85_D	GbCYP94C85_D	368	FQAGPRLC	441	ESLRLFPP	230	0	o
GB_A09G1239	A09	60264386	60265888	+	CYP94C86_A	GbCYP94C86_A	500	FQAGKRVC	438	ESLRLFPP	362	1	i7-29o
GB_D09G1083	D09	37675363	37676862	+	CYP94C86_D	GbCYP94C86_D	499	FAPSRKEV	146	ESLRLFPP	361	1	i7-29o
GB_A09G1673	A09	67941545	67943083	-	CYP94C87_A	GbCYP94C87_A	512	FQAGFRVC	446	ESMRLYPP	369	1	i13-35o
GB_D09G1534	D09	43640618	43642198	+	CYP94C87_D	GbCYP94C87_D	526	FQAGFRVC	460	ESMRLYPP	383	1	i31-53o
GB_A01G2354	A01	112955803	112956471	+	CYP94C88_A	GbCYP94C88_A	222	FQAGFRVC	155	ESMRLYLP	78	0	o
GB_D01G2431	D01	61284274	61285743	+	CYP94C88_D	GbCYP94C88_D	489	FQAGFRVC	422	ESMRLYPP	345	1	i7-24o
GB_A10G2282	A10	101805413	101806921	+	CYP94D66_A	GbCYP94D66_A	502	FHGGPRMC	442	ESLRLYPP	365	1	i5-27o
GB_D10G2264	D10	57029646	57031154	+	CYP94D66_D	GbCYP94D66_D	502	FHGGPRMC	442	ESLRLYPP	365	1	i5-27o
GB_D08G0129	D08	985974	987554	-	CYP94F9_D	GbCYP94F9_D	526	FQAGLRVC	306	ESLRLFPP	377	2	o10-32,i316-338o
GB_A11G2105	A11	37377802	37379301	-	CYP96A130_A	GbCYP96A130_A	499	FNAGPRTC	438	EALRLYPP	361	0	o
GB_D11G2458	D11	40440972	40442471	+	CYP96A130_D	GbCYP96A130_D	469	FNAGPRTC	408	ETLRLYPA	356	0	o
GB_A09G0346	A09	8728019	8729461	-	CYP96A131_A	GbCYP96A131_A	480	FGAGPRIC	419	EALRLYPP	342	0	o
GB_D09G0325	D09	10411930	10413441	-	CYP96A131_D	GbCYP96A131_D	503	FGLGVRTC	458	EALRLYPP	365	1	i5-24o
GB_D10G1121	D10	15074978	15076498	-	CYP96A132_D	GbCYP96A132_D	506	FNAGPRIC	445	EALRLYPS	368	0	o
GB_A09G0356	A09	9057072	9058139	-	CYP96A234_A	GbCYP96A234_A	355	FGAGPRIC	294	EALRLYPP	217	0	o
GB_A09G0357	A09	9114687	9115760	-	CYP96A242P_A	GbCYP96A242P_A	357	YSMGRMKS	332	EALRLYPP	294	0	o
GB_A05G4263	A05	104648542	104650074	+	CYP96K3_A	GbCYP96K3_A	510	FLVGPRIC	449	ETLRLYPP	372	1	i5-23o
GB_A05G4266	A05	104764454	104765989	-	CYP96K4_A	GbCYP96K4_A	511	FIAGPRIC	450	ETLRLYPP	373	1	i5-27o
GB_A12G0236	A12	3405362	3406894	-	CYP96K6_A	GbCYP96K6_A	510	FLAGPRIC	449	ETLRLHPP	372	1	i3-25o
GB_D12G0252	D12	3099769	3101304	-	CYP96K6a_D	GbCYP96K6a_D	511	FLAGPRIC	450	ETLRLHPP	251	1	i5-27o
GB_D12G0250	D12	3060000	3061169	-	CYP96K6bP_D	GbCYP96K6bP_D	389	FLAGPRIC	328	ESLRLYPH	389	0	o
GB_A12G0235	A12	3400536	3401828	-	CYP96K8P_A	GbCYP96K8P_A	350	FLAGPRIC	289	EEMKRHLS	200	0	o
GB_D13G0829	D13	13702465	13703961	+	CYP96Z1_D	GbCYP96Z1_D	498	FGGGSRLC	410	ETLRLFPP	360	1	i5-24o
GB_A13G1935	A13	100853204	100858851	-	CYP97A50_A	GbCYP97A50_A	623	FGGGPRKC	516	ESLRLYPQ	440	0	o
GB_D13G1872	D13	50972593	50978031	-	CYP97A50_D	GbCYP97A50_D	618	FGGGPRKC	518	ESLRLYPQ	442	0	o
GB_A07G2117	A07	81541049	81548136	-	CYP97B47_A	GbCYP97B47_A	579	FGGGPRKC	515	ESLRLYPQ	412	0	o
GB_D07G2153	D07	47818974	47826127	-	CYP97B47_D	GbCYP97B47_D	579	FGGGTRQC	408	ESLRLYPQ	412	0	o
GB_A11G3765	A11	115650280	115654530	-	CYP97C38_A	GbCYP97C38_A	548	FSGGPRKC	479	ESLRLYPH	402	0	o
GB_D11G3785	D11	71751967	71756233	-	CYP97C38_D	GbCYP97C38_D	535	FSGGPRKC	466	ETLRLHPP	368	0	o
GB_A01G2245	A01	110980676	110982493	+	CYP98A94_A	GbCYP98A94_A	508	FGAGRRVC	431	EALRLHPP	356	0	o
GB_D01G2331	D01	59895992	59897805	+	CYP98A94_D	GbCYP98A94_D	508	FGAGRRVC	431	EALRLHPP	356	0	o
GB_A13G0010	A13	64620	68585	+	CYP98A95_A	GbCYP98A95_A	509	FGAGRRVC	432	EALRLHPP	357	1	i2-24o
GB_D13G0056	D13	458694	474566	-	CYP98A95_D	GbCYP98A95_D	508	FGAGRRVC	432	ETLRIHPP	378	1	i2-24o
Probable pseudogene

## Sheet: Dataset S6
Supplementary Dataset 6 – Transmembrane helixes predication of identified CYPs in three diploid and allotetraploid cotton.
TM (helices)
	GrCYPs	GheCYPs	GaCYPs	GhCYPs	GbCYPs
0	24.6888	24.6499	19.3452	23.639	29.4032
1	60.9959	65.5462	71.4286	67.6218	62.1543
2	9.54357	8.68347	8.33333	8.16619	7.86026
3	0.414938	1.12045	0.595238	0.573066	0.436681
4			0.297619		0.14556

## Sheet: Dataset S7
Supplementary Dataset 7 – Normalized log2 transformed expression value of each fiber cluster viz., C1 to C6 at different fiber developmental stages namely -3 DPA, -1 DPA, 0 DPA, 1 DPA, 3 DPA , 5 DPA, 10 DPA, 20 DPA and 20 DPA.
C1	Gene_id	CYP	"-3 DPA"	"-1 DPA"	0 DPA	1 DPA	3 DPA	5 DPA	10 DPA	20 DPA	25 DPA
	Gh_D12G223900.1	GhCYP51G1_D	0.824035	0.425777	0.912776	0.636956	0.467022	-0.00884098	0.20488	-1.16305	-2.29956
	Gh_A11G088600.1	GhCYP704A264_A	0.752577	0.893685	0.893685	0.752577	0.47036	0.047036	-0.517396	-1.22294	-2.06959
	Gh_D11G107300.1	GhCYP706Q8_D	-0.114444	0.682652	1.08885	0.780465	1.08885	0.164424	-0.752086	-0.908133	-2.03057
	Gh_D12G284200.1	GhCYP707A142c_D	2.06155	0.799045	0.457364	0.0892701	0.0815976	-0.453752	-0.373314	-1.33088	-1.33088
	Gh_A05G032300.1	GhCYP711A55_A	1.23153	1.04933	0.975175	-0.172349	0.209393	0.529034	-1.21309	-1.6229	-0.986127
	Gh_A01G219900.1	GhCYP712A11_A	1.56976	0.582113	0.240784	0.301399	0.510538	0.582113	-0.857973	-1.00401	-1.92472
	Gh_Contig00374G000400.2	GhCYP716E47a_U	-0.354025	0.567427	1.02747	1.09571	0.8418	0.335346	-0.354025	-1.15669	-2.00302
	Gh_D07G197700.1	GhCYP71AN47_D	1.08069	0.761835	0.87201	0.231995	0.529023	0.140297	-0.141889	-1.94145	-1.5325
	Gh_D10G277900.1	GhCYP71AN49_D	1.32138	1.00983	0.812933	0.364093	0.562034	-0.200978	-1.05904	-1.48923	-1.32102
	Gh_A10G120000.1	GhCYP71AN53_A	1.54919	1.1619	0.774597	0.387298	-7.27342e-16	-0.387298	-0.774597	-1.1619	-1.54919
	Gh_A12G208800.1	GhCYP71AN55_A	0.457366	0.49233	0.725808	0.824285	0.780901	0.554913	-0.512987	-1.095	-2.22761
	Gh_D01G216000.1	GhCYP71BE154_D	1.02484	0.815493	-0.0125022	0.627371	0.305921	0.566474	-0.0730083	-0.860831	-2.39376
	Gh_D02G005900.1	GhCYP71BE175P_D	0.225834	0.431008	0.644518	0.813807	0.546269	0.916054	-0.252743	-0.970591	-2.35416
	Gh_A01G089700.1	GhCYP71BE64_A	-0.242397	0.607981	0.676992	0.874345	0.81274	0.659082	-0.0041046	-1.1795	-2.20514
	Gh_A01G040600.1	GhCYP72A502_A	1.1334	1.01343	1.15325	1.01343	-0.25289	-0.828794	-1.14573	-0.828794	-1.25731
	Gh_D01G085400.1	GhCYP72A848_D	0.781478	1.0365	1.05131	0.816544	-0.487718	0.609457	-1.00968	-1.39111	-1.40678
	Gh_D06G243800.1	GhCYP734A57_D	0.973528	0.587293	0.783999	1.15549	0.146571	-0.0629471	-0.211278	-1.68633	-1.68633
	Gh_D10G153500.1	GhCYP736A194_D	-0.186563	1.30242	0.495256	1.68858	0.495256	-0.77011	-1.42003	-0.68039	-0.924423
	Gh_D01G120300.1	GhCYP736A331_D	0.774014	0.888667	0.901182	0.901182	0.314659	0.0375529	-0.570447	-1.24249	-2.00432
	Gh_A01G064900.1	GhCYP736A332_A	1.20857	0.0351426	0.808496	1.15573	0.388593	0.0832428	-0.601148	-1.15823	-1.9204
	Gh_A13G262900.1	GhCYP73A25_A	0.90958	0.665496	0.90958	0.275665	0.90958	0.0214329	-0.438824	-2.13453	-1.11798
	Gh_D02G033900.1	GhCYP749A210a_D	0.980624	0.980624	1.17766	1.01298	0.122336	-0.998666	-0.980044	-1.31547	-0.980044
	Gh_A13G060600.1	GhCYP749A224_A	0.677835	0.626495	0.655627	0.677835	0.605722	0.351893	-0.171049	-1.0505	-2.37386
	Gh_D02G034000.1	GhCYP749A71_D	1.97352	1.27675	0.575266	0.0186385	-0.380891	-0.875768	-0.858079	-0.866695	-0.862744
	Gh_A11G164200.1	GhCYP74B25_A	1.2682	1.18395	1.02976	0.172788	0.319657	-0.349359	-0.797145	-1.26968	-1.55817
	Gh_A07G130200.1	GhCYP75A20a_A	1.02966	0.483669	1.16194	0.127594	1.02966	-0.128283	-0.607247	-1.77027	-1.32673
	Gh_A07G130000.1	GhCYP75A20b_A	0.473386	0.451696	0.830939	0.300103	0.77057	0.451696	0.400183	-1.65563	-2.02294
	Gh_D12G249000.1	GhCYP75B105_D	0.676828	0.759058	1.00242	-0.116859	0.452544	0.403688	-0.0205961	-0.685388	-2.4717
	Gh_A12G229400.1	GhCYP76Y17_A	0.599753	0.16377	0.982866	0.670636	0.723232	0.2565	0.198682	-1.56774	-2.0277
	Gh_D12G202500.1	GhCYP77A40_D	0.332301	0.291986	0.406148	0.931239	0.668801	0.699505	0.215613	-1.27107	-2.27452
	Gh_A04G163200.1	GhCYP78A190_A	0.3716	0.747921	0.278732	1.23067	0.673048	0.290899	-0.0811464	-1.75586	-1.75586
	Gh_A08G144000.1	GhCYP78A197_A	-0.095308	0.966183	0.686555	1.32738	0.646266	0.0407169	-0.586372	-2.04252	-0.942911
	Gh_A11G107100.1	GhCYP78A198_A	0.287346	1.04657	0.958616	0.819365	0.875087	0.0518373	-1.21604	-1.39495	-1.42783
	Gh_D13G153300.1	GhCYP78A202_D	0.702348	1.05011	0.652016	0.291151	0.202236	0.521211	-0.676061	-0.284672	-2.45834
	Gh_D08G143500.1	GhCYP79D117_D	-0.431486	0.864267	0.500031	1.35977	0.660897	0.448259	-0.479244	-2.10545	-0.817043
	Gh_A07G101700.1	GhCYP82L32_A	0.845515	0.793279	0.73404	0.296349	0.511867	0.660322	-0.310087	-1.76564	-1.76564
	Gh_A10G197300.1	GhCYP83F46_A	1.54919	1.1619	0.774597	0.387298	0	-0.387298	-0.774597	-1.1619	-1.54919
	Gh_A07G087000.1	GhCYP85A1_A	1.0854	0.751459	0.841669	0.735322	0.230737	0.1742	-0.76947	-0.940154	-2.10916
	Gh_A07G199000.1	GhCYP85A41_A	1.2125	0.716132	1.07043	0.272673	0.639775	0.0731403	-1.23372	-1.57074	-1.1802
	Gh_A13G086400.1	GhCYP85A42_A	1.24155	1.18012	1.20818	0.548454	-0.126621	-0.706109	-1.14684	-1.27009	-0.928642
	Gh_D07G128700.1	GhCYP87B28_D	0.510885	0.398989	1.02881	0.273889	1.02881	0.194934	0.0691308	-2.06974	-1.43571
	Gh_A13G013700.1	GhCYP88A80_A	1.11872	1.36025	1.11872	0.567255	-0.121026	-0.772999	-1.21554	-1.27553	-0.779849
	Gh_D13G266900.1	GhCYP89A157_D	1.04697	0.0834045	1.13546	0.35758	1.04697	-0.169607	-0.255798	-1.73321	-1.51176
	Gh_A10G245100.1	GhCYP90A47_A.1	1.04195	0.933142	0.715511	0.843475	0.317846	-0.0240965	-0.625776	-1.28449	-1.91757
	Gh_A10G245100.2	GhCYP90A47_A.2	1.59468	0.949842	0.554993	0.31381	0.129965	-0.0928698	-0.451021	-1.04082	-1.95858
	Gh_A10G043600.1	GhCYP92A132_A	1.54919	1.1619	0.774597	0.387298	0	-0.387298	-0.774597	-1.1619	-1.54919
	Gh_D11G165300.1	GhCYP94B70_D	0.62552	1.44425	0.797494	1.1781	-0.290104	-0.539397	-1.20742	-0.434549	-1.57389
	Gh_D08G180000.1	GhCYP94F9_D	0.931727	0.573817	0.782072	0.678192	0.443312	0.160462	0.0303845	-1.91822	-1.68175
	Gh_D12G054900.1	GhCYP96A130_D	0.899702	1.2891	1.17486	0.717229	0.0764331	-0.587293	-1.11371	-1.3426	-1.11371
C2	Gh_A01G090900.1	GhCYP71BE169P_A	-0.0497899	0.496737	-0.455306	0.308016	-0.125989	1.85562	0.781819	-0.943482	-1.86762
	Gh_A03G020400.1	GhCYP706B2_A	-0.318134	-0.882206	0.416408	0.373052	0.625747	1.34689	1.19571	-1.8093	-0.948161
	Gh_A05G014900.1	GhCYP734A56_A	0.6478	0.240164	-0.194057	-0.012372	0.275148	1.03091	1.34205	-1.69682	-1.63282
	Gh_A05G411700.1	GhCYP714A30_A	-0.730775	0.238793	0.0538993	0.814324	0.407127	1.57209	0.671981	-1.70269	-1.32475
	Gh_A06G013600.1	GhCYP82D148_A	-0.983555	-0.0186294	0.747658	0.585894	0.887186	1.0943	0.647577	-1.06551	-1.89493
	Gh_A06G015200.1	GhCYP701A18_A	0.15509	0.301714	0.229477	0.229477	0.862735	0.862735	0.933584	-1.66542	-1.90939
	Gh_A06G173500.1	GhCYP77B26_A	0.2547	-0.214669	-0.0398985	0.0998784	0.711384	1.2081	1.167	-1.10684	-2.07965
	Gh_A09G034000.1	GhCYP96A131_A	0.449761	0.698257	0.56575	0.346703	0.153843	0.78225	0.682433	-1.86261	-1.81639
	Gh_A09G157900.1	GhCYP94C87_A	0.209411	-0.312023	0.209411	0.312382	0.469433	1.10786	1.23448	-1.10256	-2.12839
	Gh_A10G119600.1	GhCYP749A223P_A	0.350764	0.374648	0.390104	0.568801	0.242692	0.746212	0.627691	-0.700945	-2.59997
	Gh_A12G114000.1	GhCYP714E37_A	1.26033	0.636115	0.483602	-0.431906	-0.180246	0.40708	0.730765	-0.549376	-2.35637
	Gh_A13G152100.1	GhCYP71BE77_A	0.154536	-0.657033	-0.0281443	-0.192877	0.748381	1.55376	1.2409	-1.50318	-1.31635
	Gh_Contig00640G000800.1	GhCYP71BE155_U	0.633764	-0.0600604	0.826259	0.233834	0.0741318	0.233834	1.11941	-0.566559	-2.49462
	Gh_D05G044100.1	GhCYP86B32_D	0.740929	0.0665975	0.713937	-0.363255	0.0018063	0.845805	1.28606	-1.73904	-1.55285
	Gh_D06G175500.1	GhCYP82D323P_D	0.400378	0.0325865	0.523596	0.439583	0.787704	0.72797	0.551467	-1.05358	-2.40971
	Gh_D09G032600.1	GhCYP76F89b_D	-0.0897445	-0.0406598	-0.161258	0.676009	0.349528	1.32427	1.1792	-1.60003	-1.63732
	Gh_D10G108700.1	GhCYP76F174P_A	-0.00219559	0.0980402	0.462479	0.260437	0.243509	0.832981	1.46598	-1.96124	-1.39999
	Gh_D12G101700.1	GhCYP76G21_D	0.309212	0.309212	0.0703149	1.1799	0.355703	0.298539	0.665033	-0.679524	-2.50839
	Gh_D12G202600.1	GhCYP714E37_D	0.30239	-0.301427	0.998365	0.389099	-0.424256	0.783246	1.39322	-1.53004	-1.6106
C3	Gh_A05G025800.1	GhCYP72D17_A	-1.16324	-1.33029	-0.00978262	-0.604107	0.839707	1.84894	1.08122	-0.331225	-0.331225
	Gh_A05G249100.1	GhCYP81B89a_A	-1.30385	-1.42267	0.159139	-0.0297707	1.08757	1.26014	1.36333	-0.556939	-0.556939
	Gh_A06G065400.1	GhCYP734A57_A	-0.740807	-1.04111	-0.845082	0.397257	1.01371	1.24523	1.60479	-0.875363	-0.758625
	Gh_A10G181700.1	GhCYP73A26_A	-0.0673912	-1.83967	-0.185489	-0.904416	0.296056	2.0392	0.667973	-0.185489	0.179233
	Gh_D03G176000.1	GhCYP94B68_D	-1.25839	-1.25839	-0.136778	-0.219871	0.692285	1.00733	1.5136	-1.15049	0.810706
	Gh_D03G176100.1	GhCYP86A128_D	-1.25697	-0.978967	-0.984348	0.00195763	0.807669	1.20748	1.44347	-0.916977	0.676682
	Gh_D04G019000.1	GhCYP87A54_D	-0.431645	-1.63481	-0.815323	-0.26245	0.621561	1.27889	1.77818	-0.0661417	-0.468261
	Gh_D05G264700.1	GhCYP82D113_D	-1.07931	-1.60875	-0.183433	-0.371649	1.10062	0.248549	1.9361	-0.183433	0.141305
	Gh_D09G150600.1	GhCYP96A235_D	-0.547047	-1.015	-0.633349	0.482281	0.438792	1.5413	1.60538	-0.672981	-1.19938
	Gh_D10G202000.1	GhCYP736A195_D	-0.500852	-1.46647	0.0415442	-1.14169	0.79174	0.526053	2.02152	-0.500852	0.229015
	Gh_D13G001000.2	GhCYP706C46_D	-0.0772968	-1.20607	0.165394	-1.16275	0.887242	1.99247	0.613202	-0.223839	-0.988349
C4	Gh_A02G199700.1	GhCYP90C25_A	-0.168363	-1.01011	-1.2084	-0.826845	-0.952339	0.427364	1.04863	1.34503	1.34503
	Gh_A05G404100.1	GhCYP96K3_A	-1.06971	-0.552222	-0.623854	-0.988823	-0.854243	0.0562591	1.47608	1.23222	1.32429
	Gh_A05G404400.1	GhCYP96K5_A	-0.62594	-0.844746	-0.914697	-0.875171	-0.377805	1.04821	2.16727	0.574817	-0.15193
	Gh_A06G206600.1	GhCYP727B4_A	0.133966	-1.02934	-1.61958	-0.563478	-0.599069	1.07612	0.990619	1.57559	0.0351818
	Gh_A08G201000.1	GhCYP76F90_A	-1.34142	-1.32009	-0.997804	-0.216461	0.00982687	0.387206	0.822883	1.50331	1.15255
	Gh_A09G046000.1	GhCYP94B71_A	-0.540851	-0.820215	-0.786525	-0.420432	-0.974687	-0.284736	1.39349	2.02456	0.409401
	Gh_A10G203700.1	GhCYP714E34_A	-1.54919	-1.1619	-0.774597	-0.387298	0	0.387298	0.774597	1.1619	1.54919
	Gh_A11G006600.1	GhCYP706Q4_A	-0.561656	-0.814401	-0.89865	-0.814401	-0.561656	-0.140414	0.449325	1.20756	2.13429
	Gh_A11G088500.1	GhCYP704A129_A	-0.176815	-1.18655	-1.38238	-1.00308	-0.176815	0.321196	1.14849	1.52325	0.932699
	Gh_A11G156600.1	GhCYP724B28_A	0.529862	-1.11039	-1.51848	-1.08504	-0.200735	0.743791	1.35789	1.25091	0.0321972
	Gh_A11G173000.1	GhCYP735A40_A	0.374614	-1.16485	-1.49463	-1.00808	-0.0985825	0.840488	1.41576	1.23386	-0.0985825
	Gh_A11G189600.1	GhCYP84A78_A	-0.333207	-1.16035	-1.30707	-0.966861	-0.333207	0.40041	1.0405	1.39359	1.26619
	Gh_A11G199800.1	GhCYP82C143P_A	-0.752577	-0.893685	-0.893685	-0.752577	-0.47036	-0.047036	0.517396	1.22294	2.06959
	Gh_A11G237400.1	GhCYP81AT2_A	-0.471142	-1.11045	-1.15558	-0.471142	-0.0318787	0.191627	1.41539	1.95958	-0.326412
	Gh_A11G347400.1	GhCYP89A155_A	0.63812	-1.22631	-0.781689	-1.30349	-0.607004	0.223829	0.334194	1.88222	0.840131
	Gh_A11G370500.1	GhCYP76G21_A	-0.785612	-1.21413	-1.16822	-0.785612	-0.204055	0.438718	1.00497	1.35697	1.35697
	Gh_A12G025900.1	GhCYP96K8P_A	-0.768142	-1.32783	-1.24402	-0.768142	-0.00998861	0.717265	1.40551	1.11692	0.878431
	Gh_A12G030200.1	GhCYP82C59c_A	-0.415172	-0.199343	-0.415172	-1.48388	-1.26711	-0.00751123	1.32671	1.13476	1.32671
	Gh_A12G058400.1	GhCYP735A41_A	-0.65524	-1.37419	-1.27687	-0.65524	0.19873	0.99308	1.43585	1.23508	0.0987974
	Gh_A12G159000.1	GhCYP72A507_A	-0.66798	-1.37463	-1.27971	-0.66798	0.175784	0.966813	1.42034	1.25158	0.175784
	Gh_A12G213900.1	GhCYP71BF17P	-0.687984	-1.0686	-0.687984	-1.25527	-0.352751	0.235406	0.825971	1.49561	1.49561
	Gh_A13G019100.1	GhCYP714E79_A-partial	-1.7442	-1.28133	-0.626354	0.0849907	0.716974	1.13387	1.19993	0.779446	-0.263327
	Gh_A13G134100.1	GhCYP716E46_A	-0.0436748	-1.26896	-1.44775	-0.924494	-0.0436748	0.850247	1.41281	1.29953	0.165964
	Gh_Contig00374G000400.1	GhCYP716E47b_U	0.270699	-1.03476	-1.4227	-1.1518	-0.479549	0.270699	1.20375	1.22929	1.11438
	Gh_D01G085300.1	GhCYP72A504_D	-0.196166	-1.24439	-1.41095	-0.970117	-0.196166	0.636635	1.25402	1.3817	0.745431
	Gh_D02G033800.1	GhCYP749A210b_D	-0.487402	-1.22987	-1.22958	-0.487402	-0.718329	1.2759	1.58971	0.61896	0.668002
	Gh_D02G034200.1	GhCYP749A72a_D	-1.13752	-0.955527	-0.713623	-1.13752	0.511876	0.44507	0.528579	0.445813	2.01285
	Gh_D03G027400.1	GhCYP733A1_D	-0.5695	-1.19995	-1.21991	-0.5695	-0.808461	1.06797	1.10918	1.08099	1.10918
	Gh_D04G018800.1	GhCYP87A56_D	-1.42921	-1.05353	-1.06477	-0.361769	0.0870333	0.943011	1.64715	0.943011	0.289078
	Gh_D06G012800.1	GhCYP71BE70b_D	-1.21391	-1.23926	-1.29258	0.153373	-0.0261039	0.378642	0.421377	1.44717	1.37129
	Gh_D06G187300.1	GhCYP82D152b_D	-1.21981	-1.56109	-0.388656	-0.865104	0.0607586	0.594049	1.08335	1.21314	1.08335
	Gh_D09G032400.1	GhCYP76F90_D	-0.783168	-0.94092	-1.22196	-0.810938	-0.0712453	0.952232	1.39358	1.57722	-0.0948042
	Gh_D10G226900.1	GhCYP83F70P_D	-0.914476	-0.982196	-1.2502	-0.124838	-0.74323	0.265825	0.793567	1.47777	1.47777
	Gh_D10G247500.1	GhCYP83F62_D	-0.97772	-1.03247	-1.22626	-0.040026	-0.836643	0.448474	1.08454	1.473	1.1071
	Gh_D11G039300.1	GhCYP706P1_D	-1.05287	-1.28463	-1.43239	-0.235207	0.0262328	0.632472	1.09434	1.12602	1.12602
	Gh_D11G047300.1	GhCYP81AZ1_D	-1.47718	-0.307756	-1.62253	-0.486126	0.0393849	0.672458	1.08969	1.15731	0.934748
	Gh_D11G191800.1	GhCYP704A129_D	-0.694804	-0.873622	-1.09423	-0.847166	-0.429914	-0.00352242	0.754906	1.56695	1.6214
	Gh_D12G025300.1	GhCYP82C96_D	-0.831678	-1.16226	-0.831678	-0.961423	-0.226998	0.0307304	1.33107	1.32116	1.33107
	Gh_D12G058200.1	GhCYP73A286_D	-0.041227	-1.2723	-1.43444	-0.8866	-0.041227	1.02864	1.37194	1.26242	0.0127878
	Gh_D12G096800.1	GhCYP89A156_D	-0.659129	-0.659129	-1.17786	-0.71888	-1.16369	0.884309	1.10628	1.28183	1.10628
	Gh_D12G224000.1	GhCYP71AS19_D	-1.45935	-1.40241	-0.456775	-0.760508	0.285125	0.620551	1.21882	1.33399	0.620551
C5	Gh_A02G027700.1	GhCYP749A208_A	0.0791207	-0.580406	-0.411996	-1.05754	0.111225	-0.849715	-0.266043	2.52141	0.453935
	Gh_A02G027800.1	GhCYP749A209_A	-0.389384	-0.527816	-0.614075	-0.947827	-0.0453127	-0.837263	-0.198499	2.10753	1.45265
	Gh_A02G028100.1	GhCYP749A206_A	-1.24439	0.0814876	0.0261717	-0.800302	-0.252893	-0.252893	-0.928733	1.94027	1.43128
	Gh_A03G020500.1	GhCYP706B28P_A	0.735792	-0.597166	-0.262383	-1.08076	-1.43772	-0.138901	-0.284158	1.53265	1.53265
	Gh_A03G057900.1	GhCYP707A144_A	0.994366	-0.63991	-0.599603	-0.396435	-1.63906	-0.0306221	-0.517713	1.66747	1.16151
	Gh_A03G094200.1	GhCYP71AP34_A	-0.458957	-1.002	-0.318383	-0.0952298	0.0026419	-0.645782	-0.847366	2.3451	1.01998
	Gh_A03G155300.1	GhCYP86C17_A	-0.223445	-0.53682	-0.53682	-1.03275	-0.0822534	-0.53682	-0.468003	2.39966	1.01725
	Gh_A04G056200.1	GhCYP71BE71_A	-0.00649137	-0.29392	-0.334602	-0.78825	-1.40896	-0.29392	-0.336201	1.76079	1.70155
	Gh_A04G129000.1	GhCYP86B32_A	-0.736363	0.155254	-0.843413	-0.178786	-1.22004	-0.0222205	-0.569526	1.85849	1.55661
	Gh_A04G170100.1	GhCYP749A73b_A	-0.310837	-0.507619	-0.48891	-0.755342	-1.05001	-0.514421	0.0304644	1.79834	1.79834
	Gh_A05G076200.1	GhCYP86A129_A	-0.548685	-0.672078	-0.429031	-0.112151	-0.690464	-0.666219	-0.420169	2.35759	1.1812
	Gh_A05G171300.1	GhCYP83F69P_A	-0.335405	-0.544683	-0.414148	0.214384	-0.991897	-0.735108	-0.712579	2.03185	1.48758
	Gh_A06G014000.1	GhCYP82D327P_A	-0.211549	-0.521012	-0.47737	-0.641344	-0.733693	-0.577649	-0.521012	2.08326	1.60037
	Gh_A11G047000.1	GhCYP84A79_A	0.562463	0.0936261	-0.439034	-0.52447	-1.42124	-0.894421	-0.37376	0.883213	2.11362
	Gh_A12G083300.1	GhCYP81BA2_A	-0.848443	-0.317036	-0.373714	-0.00343844	-0.636082	-0.165934	-1.01729	2.35981	1.00212
	Gh_A13G001300.1	GhCYP98A95_A	-0.0861002	-1.20653	-0.569756	-0.787248	-0.198949	0.225062	-0.787248	1.524	1.88678
	Gh_A13G110700.1	GhCYP89A157_A	0.500498	-0.167469	-0.0221209	-0.969836	-1.7776	-0.515761	0.195608	1.88657	0.870117
	Gh_D02G033000.1	GhCYP93A87_D	-0.141097	-0.141097	-0.180998	0.228508	-0.638692	-1.23863	-1.19098	1.82443	1.47854
	Gh_D02G033100.1	GhCYP93A88_D	0.170872	-0.469897	-0.854358	-0.982511	-0.854358	-0.469897	0.170872	1.06795	2.22133
	Gh_D02G035100.1	GhCYP749A66_D	-0.89082	-0.905375	-0.817236	-0.89082	0.187462	-0.0586897	-0.0548861	1.71518	1.71518
	Gh_D02G234400.1	GhCYP749A183P_D	-0.667339	-0.767329	-0.79572	-0.667339	-0.399133	-0.1859	-0.168312	1.82554	1.82554
	Gh_D03G011600.1	GhCYP749A194_D	-0.444246	0.0396868	-0.524269	-0.00341178	-0.833101	-1.12546	-0.622186	1.81909	1.69389
	Gh_D04G169100.1	GhCYP706B3_D	-0.998037	0.0372897	-1.06717	-0.208658	-0.0273939	-0.172408	-0.9749	1.80775	1.60352
	Gh_D05G088100.1	GhCYP82C140P_D	0.897931	-1.08143	0.072659	-0.307468	-0.448824	-1.01497	-0.966516	2.01649	0.832126
	Gh_D05G134100.1	GhCYP749A73_D	0.397719	-0.223901	-0.399857	-0.45839	-0.935564	-0.663947	-0.741261	2.50763	0.517566
	Gh_D05G188400.1	GhCYP711A55_D	-0.328304	-0.415907	-0.440409	-0.764357	-0.957805	-0.3463	-0.415907	1.83449	1.83449
	Gh_D05G198900.1	GhCYP714F8_D	-0.553561	-0.623703	-0.646205	-0.551728	-0.0440562	-0.553881	-0.542119	1.1246	2.39066
	Gh_D05G199000.1	GhCYP79D64_D	-0.757462	-0.759522	0.0877965	-0.159326	-0.125772	-0.757462	-0.809766	0.870423	2.41109
	Gh_D05G378900.1	GhCYP74A1_D	-0.26244	-0.0671947	-0.0776541	-0.542106	-0.737	-0.905492	-0.966215	1.77905	1.77905
	Gh_D06G006300.1	GhCYP81B89_D	-0.37333	-0.376296	-0.40613	-0.43895	-0.149553	-0.902405	-0.827183	2.37201	1.10184
	Gh_D06G012400.1	GhCYP82D109_D	-0.151057	-0.270436	-0.3087	-0.696551	-0.839514	-0.679518	-0.67558	2.07856	1.5428
	Gh_D08G018700.1	GhCYP749A74_D	-0.6157	-0.798915	-0.701689	0.174146	-0.514376	-0.57821	-0.57821	1.80648	1.80648
	Gh_D08G243400.1	GhCYP88A79_D	-0.634893	-0.397369	0.0830317	-0.110456	-0.274408	-0.505872	-1.0764	2.61522	0.301146
	Gh_D09G041700.1	GhCYP76F91_D	-0.0185835	0.0677955	0.0450348	-0.377707	-0.454871	-0.903	-1.34363	2.37784	0.607116
	Gh_D12G131000.1	GhCYP96K7P_D	0.292236	0.292236	-0.336097	-0.962938	-0.929662	-1.06446	-0.58269	1.779	1.51238
	Gh_D12G284300.1	GhCYP707A142a_D	0.842006	0.0812245	-0.790268	-1.08155	-1.02913	-0.930581	-0.0818919	1.28566	1.70454
C6	Gh_D12G220400.1	GhCYP703A26_D	0.0509219	0.0509219	0.389823	-0.0939131	-0.682466	-0.570504	-0.74632	-0.960388	2.56192
	Gh_D03G096600.1	GhCYP71AS20_D	-0.347258	-0.347258	-0.312579	-0.619237	-0.253591	-0.287356	-0.312579	-0.334592	2.81445
	Gh_A01G090400.1	GhCYP71BE67_A	0.484146	-0.270628	-0.222791	-1.18607	-0.245531	-0.542968	-0.161775	-0.435974	2.58159
	Gh_A13G153200.1	GhCYP71BE79_A	0.00581834	0.00581834	-0.575312	-1.25144	-0.566947	-0.102056	0.107525	-0.214435	2.59103
	Gh_A09G061500.1	GhCYP736A196_A	-0.353306	-1.1456	-0.127768	-0.049931	0.495164	0.27856	-0.983713	-0.55234	2.43893
	Gh_A05G282900.1	GhCYP736A343P_A	0.481613	-0.0838423	-0.399227	-0.507659	-1.27744	-0.313899	0.0276096	-0.45764	2.53048
	Gh_A02G116300.1	GhCYP78A194_A	0.513019	-0.294126	-0.100035	-1.12378	-1.05548	-0.196551	0.16081	-0.366495	2.46263
	Gh_D08G196800.1	GhCYP78A197_D	-0.642126	-0.571458	0.107479	-0.188014	-0.120818	-0.558758	-0.211701	-0.558758	2.74415
	Gh_A05G096100.1	GhCYP79D64_A	-0.637292	-0.704962	-0.442876	-0.260273	0.319774	0.427413	-0.661244	-0.631338	2.5908
	Gh_A05G304700.1	GhCYP82D109_A	-0.00279836	-0.230278	-0.400142	-0.423603	-0.813013	-0.338536	-0.129385	-0.425256	2.76301
	Gh_A05G181600.1	GhCYP82D113_A	-0.384563	-0.55994	-0.644384	-0.412831	0.635829	0.602738	-0.608589	-1.02792	2.39966
	Gh_D05G339700.1	GhCYP82D146_D	-0.0322058	0.47869	0.305537	-0.068358	-0.71905	-0.81399	-0.81399	-0.8185	2.48187
	Gh_D06G013700.1	GhCYP82D150_D	0.559344	0.198929	0.143559	-0.378637	-0.893901	-0.739858	-0.739858	-0.636475	2.4869
	Gh_A05G181500.1	GhCYP82D325P_A	0.409777	0.170732	0.000729486	-1.11233	-1.08786	-0.630398	-0.023904	-0.1673	2.44055
	Gh_A06G014600.1	GhCYP82D329P_A	0.221273	-0.269289	-0.185498	-0.471386	-0.844429	-0.374714	-0.641481	-0.143069	2.70859
	Gh_D08G197000.1	GhCYP86A132_D	-0.781267	-0.645864	0.112237	-0.0687912	-0.168582	-0.473178	-0.226725	-0.473178	2.72535
	Gh_D13G039000.1	GhCYP87A96_D	0.100729	-0.185564	-0.589037	-0.883944	-0.181442	-0.53034	-0.151673	-0.299105	2.72038
	Gh_D09G056300.1	GhCYP94A74_D	-0.134375	-0.271746	-0.269163	0.534048	-0.614644	-0.614644	-0.517425	-0.750866	2.63881
